# Supplementary material for: Novel LOTUS-domain proteins are organizational hubs that recruit C. elegans Vasa to germ granules
Source: eLife. 2021 Jul 5;10:e60833. doi: 10.7554/eLife.60833 (PMC8331183; doi:10.7554/eLife.60833)
Supplement: Figure 2—figure supplement 2—source data 1. [file elife-60833-fig2-figsupp2-data1.xlsx]

## Sheet: Figure_2_S2
Figure 2 - figure supplement 2: Brood size and survival in mip-1;mip-2 double null mutants. Brood_Size: total number of progeny per plate. Emb: total number of progeny per plate that were embryonic lethal. NA = not applicable (zero fertile animals).
Plate_Line	Generation	Worms_Shifted	Fertile_Mothers	Brood_Size	Emb	Brood_Size_per_Mother	Percent_Survival
1	2	6	4	367	12	91.75	96.7302
1	3	6	5	213	168	42.6	21.1268
1	4	6	3	53	45	17.6667	15.0943
1	5	5	0	0	NA	NA	NA
2	2	6	4	281	77	70.25	72.5979
2	3	6	1	112	104	112	7.14286
2	4	5	1	1	1	1	0
3	2	6	4	223	110	55.75	50.6726
3	3	5	1	4	4	4	0
4	2	2	2	267	79	133.5	70.412
4	3	6	0	0	NA	NA	NA
5	2	3	2	122	33	61	72.9508
5	3	6	2	86	67	43	22.093
5	4	6	6	374	320	62.3333	14.4385
5	5	6	0	0	NA	NA	NA
6	2	2	2	119	0	59.5	100
6	3	6	2	146	50	73	65.7534
6	4	4	1	56	56	56	0
7	2	3	3	123	101	41	17.8862
7	3	6	0	0	NA	NA	NA
9	2	2	2	48	43	24	10.4167
9	3	2	0	0	NA	NA	NA
10	3	6	4	200	111	50	44.5
10	4	5	0	0	NA	NA	NA
11	3	5	3	81	78	27	3.7037
11	4	8	7	123	63	17.5714	48.7805
11	5	6	1	5	5	5	0
12	3	6	4	67	42	16.75	37.3134
12	4	2	0	0	NA	NA	NA
13	3	6	2	8	7	4	12.5
13	4	6	0	0	NA	NA	NA
14	3	4	3	193	47	64.3333	75.6477
14	4	6	1	1	1	1	0
15	3	4	1	86	2	86	97.6744
15	4	6	1	76	76	76	0
16	3	6	4	82	5	20.5	93.9024
16	4	6	0	0	NA	NA	NA
17	3	5	5	65	12	13	81.5385
17	4	6	0	0	NA	NA	NA
18	3	5	2	64	19	32	70.3125
18	4	6	2	179	145	89.5	18.9944
18	5	6	1	3	0	3	100
18	6	3	0	0	NA	NA	NA
