# Supplementary material for: Novel LOTUS-domain proteins are organizational hubs that recruit C. elegans Vasa to germ granules
Source: eLife. 2021 Jul 5;10:e60833. doi: 10.7554/eLife.60833 (PMC8331183; doi:10.7554/eLife.60833)
Supplement: Figure 2—source data 1. [file elife-60833-fig2-data1.xlsx]

## Sheet: Figure_2A
Figure 2A: Proportion of embryonic lethality (Emb) and sterility (Ste) in animals treated with mip-1(RNAi);mip-2(RNAi) vs. L4440(RNAi) at each generation (P0, F1, F2). SEM: standard error.
RNAi_Treatment	Generation	Phenotype	Percent	SEM
L4440	P0	Emb	0	0
L4440	P0	Ste	3	3.26
L4440	P0	Fertile	97	3.26
L4440	F1	Emb	0	0
L4440	F1	Ste	6	1.65
L4440	F1	Fertile	94	1.65
L4440	F2	Emb	1	0.71
L4440	F2	Ste	3	1.42
L4440	F2	Fertile	96	1.88
mip-1;mip-2	P0	Emb	13	3.33
mip-1;mip-2	P0	Ste	16	1.46
mip-1;mip-2	P0	Fertile	71	1.88
mip-1;mip-2	F1	Emb	30	7.18
mip-1;mip-2	F1	Ste	45	1.65
mip-1;mip-2	F1	Fertile	25	8.35
mip-1;mip-2	F2	Emb	17	5.56
mip-1;mip-2	F2	Ste	79	6.82
mip-1;mip-2	F2	Fertile	4	1.28

## Sheet: Figure_2B
Figure 2B: Proportion of phenotypic classes over three generations (P0, F1, F2) treated with mip-1(RNAi);mip-2(RNAi).
Generation	Strain	Phenotype	Count
P0	OD95	Few_Cells	0
P0	OD95	Pachytene_Arrest	0
P0	OD95	Spermatogenesis_Only	0
P0	OD95	Reduced_Germline	2
P0	OD95	Small_Oocytes	13
P0	OD95	Minor_Defects	14
P0	GKC509	Few_Cells	0
P0	GKC509	Pachytene_Arrest	0
P0	GKC509	Spermatogenesis_Only	0
P0	GKC509	Reduced_Germline	0
P0	GKC509	Small_Oocytes	6
P0	GKC509	Minor_Defects	22
F1	OD95	Few_Cells	0
F1	OD95	Pachytene_Arrest	9
F1	OD95	Spermatogenesis_Only	6
F1	OD95	Reduced_Germline	10
F1	OD95	Small_Oocytes	6
F1	OD95	Minor_Defects	7
F1	GKC509	Few_Cells	0
F1	GKC509	Pachytene_Arrest	8
F1	GKC509	Spermatogenesis_Only	9
F1	GKC509	Reduced_Germline	5
F1	GKC509	Small_Oocytes	4
F1	GKC509	Minor_Defects	12
F2	OD95	Few_Cells	50
F2	OD95	Pachytene_Arrest	3
F2	OD95	Spermatogenesis_Only	4
F2	OD95	Reduced_Germline	9
F2	OD95	Small_Oocytes	0
F2	OD95	Minor_Defects	0
F2	GKC509	Few_Cells	14
F2	GKC509	Pachytene_Arrest	10
F2	GKC509	Spermatogenesis_Only	0
F2	GKC509	Reduced_Germline	3
F2	GKC509	Small_Oocytes	0
F2	GKC509	Minor_Defects	0

## Sheet: Figure_2C
Figure 2C: Diameter of remaining germline nuclei in severely reduced mip-1(RNAi);mip-2(RNAi) adult hermaphrodite germ lines (“few cells” class) compared with nuclei from adult hermaphrodite control germ lines mock-treated with L4440(RNAi) in strain GKC509. Units for Diameter: um.
RNAi_Treatment	Region	Diameter
L4440	Mitotic	3.221
L4440	Mitotic	3.335
L4440	Mitotic	2.76
L4440	Mitotic	3.338
L4440	Mitotic	3.414
L4440	Mitotic	2.697
L4440	Mitotic	2.486
L4440	Mitotic	3.221
L4440	Mitotic	3.287
L4440	Mitotic	4.045
L4440	Mitotic	3.414
L4440	Mitotic	2.637
L4440	Mitotic	2.228
L4440	Mitotic	2.649
L4440	Mitotic	2.689
L4440	Mitotic	3.109
L4440	Mitotic	2.813
L4440	Mitotic	3.157
L4440	Mitotic	2.558
L4440	Mitotic	3.127
L4440	Mitotic	2.637
L4440	Mitotic	3.571
L4440	Mitotic	3.467
L4440	Mitotic	3.247
L4440	Mitotic	3.559
L4440	Mitotic	3.001
L4440	Mitotic	3.164
L4440	Mitotic	3.218
L4440	Mitotic	2.813
L4440	Mitotic	2.685
L4440	Mitotic	2.76
L4440	Mitotic	3.864
L4440	Mitotic	2.194
L4440	Mitotic	3.76
L4440	Mitotic	2.874
L4440	Mitotic	3.522
L4440	Mitotic	2.697
L4440	Mitotic	3.746
L4440	Mitotic	2.885
L4440	Mitotic	2.5
L4440	Mitotic	2.428
L4440	Mitotic	2.615
L4440	Mitotic	2.954
L4440	Mitotic	2.802
L4440	Mitotic	2.922
L4440	Mitotic	2.642
L4440	Mitotic	3.166
L4440	Mitotic	2.738
L4440	Mitotic	2.767
L4440	Mitotic	2.649
L4440	Mitotic	2.783
L4440	Mitotic	2.961
L4440	Mitotic	3.393
L4440	Mitotic	3.132
L4440	Mitotic	2.476
L4440	Mitotic	2.462
L4440	Mitotic	2.711
L4440	Mitotic	3.637
L4440	Mitotic	3.025
L4440	Mitotic	3.129
L4440	Mitotic	2.786
L4440	Mitotic	4.019
L4440	Mitotic	3.839
L4440	Mitotic	4.031
L4440	Mitotic	3.372
L4440	Mitotic	3.714
L4440	Mitotic	3.144
L4440	Mitotic	2.995
L4440	Mitotic	2.686
L4440	Mitotic	2.802
L4440	Mitotic	2.124
L4440	Mitotic	2.306
L4440	Mitotic	3.509
L4440	Mitotic	3.11
L4440	Mitotic	3.545
L4440	Mitotic	2.611
L4440	Pachytene	5.53
L4440	Pachytene	5.84
L4440	Pachytene	5.07
L4440	Pachytene	5.07
L4440	Pachytene	5.79
L4440	Pachytene	5.44
L4440	Pachytene	6.67
L4440	Pachytene	6.08
L4440	Pachytene	6.3
L4440	Pachytene	6.83
L4440	Pachytene	5.69
L4440	Pachytene	6.07
L4440	Pachytene	5.45
L4440	Pachytene	5.44
L4440	Pachytene	6.36
L4440	Pachytene	5.49
L4440	Pachytene	5.15
L4440	Pachytene	5.2
L4440	Pachytene	5.51
L4440	Pachytene	6.59
L4440	Pachytene	6.11
L4440	Pachytene	5.19
L4440	Pachytene	6.23
L4440	Pachytene	6.17
L4440	Pachytene	5.87
L4440	Pachytene	5.18
L4440	Pachytene	5.4
L4440	Pachytene	6.09
L4440	Pachytene	7.17
L4440	Pachytene	6.01
L4440	Pachytene	5.65
L4440	Pachytene	5.63
L4440	Pachytene	6.45
L4440	Pachytene	6.44
L4440	Pachytene	5.65
L4440	Pachytene	5.25
L4440	Pachytene	5.57
L4440	Pachytene	6.17
L4440	Pachytene	6.68
L4440	Pachytene	5.43
L4440	Pachytene	5.72
L4440	Pachytene	5.95
L4440	Pachytene	5.21
L4440	Pachytene	5.15
L4440	Pachytene	5.88
L4440	Pachytene	5.65
L4440	Pachytene	6.69
L4440	Pachytene	6.09
L4440	Pachytene	4.2
L4440	Pachytene	6.1
mip-1;mip-2	Distal	6.415
mip-1;mip-2	Distal	5.691
mip-1;mip-2	Distal	5.589
mip-1;mip-2	Distal	4.999
mip-1;mip-2	Distal	4.906
mip-1;mip-2	Distal	4.934
mip-1;mip-2	Distal	4.939
mip-1;mip-2	Distal	5.188
mip-1;mip-2	Distal	4.458
mip-1;mip-2	Distal	6.013
mip-1;mip-2	Distal	4.949
mip-1;mip-2	Distal	5.644
mip-1;mip-2	Distal	5.284
mip-1;mip-2	Distal	5.85
mip-1;mip-2	Distal	6.93
mip-1;mip-2	Distal	5.171
mip-1;mip-2	Distal	5.697
mip-1;mip-2	Distal	4.975
mip-1;mip-2	Distal	4.689
mip-1;mip-2	Distal	5.382
mip-1;mip-2	Distal	5.364
mip-1;mip-2	Distal	4.791
mip-1;mip-2	Distal	5.077
mip-1;mip-2	Distal	5.6
mip-1;mip-2	Distal	5.237
mip-1;mip-2	Distal	5.441
mip-1;mip-2	Distal	5.975
mip-1;mip-2	Distal	4.868
mip-1;mip-2	Distal	5.697
mip-1;mip-2	Distal	5.324
mip-1;mip-2	Distal	5.712
mip-1;mip-2	Distal	5.318
mip-1;mip-2	Distal	4.762
mip-1;mip-2	Distal	6.159
mip-1;mip-2	Distal	4.422
mip-1;mip-2	Distal	4.775
mip-1;mip-2	Distal	4.331
mip-1;mip-2	Distal	5.823
mip-1;mip-2	Distal	6.728
mip-1;mip-2	Distal	6.173
mip-1;mip-2	Distal	5.964
mip-1;mip-2	Distal	5.997
mip-1;mip-2	Distal	6.785
mip-1;mip-2	Distal	5.701
mip-1;mip-2	Distal	5.632
mip-1;mip-2	Distal	5.701
mip-1;mip-2	Distal	5.928
mip-1;mip-2	Distal	6.985
mip-1;mip-2	Distal	5.975
mip-1;mip-2	Distal	5.295
mip-1;mip-2	Distal	6.253
mip-1;mip-2	Distal	4.763
mip-1;mip-2	Distal	5.393
mip-1;mip-2	Distal	7.384
mip-1;mip-2	Distal	5.997
mip-1;mip-2	Distal	5.813
mip-1;mip-2	Distal	4.962
mip-1;mip-2	Distal	4.671
mip-1;mip-2	Distal	4.914
mip-1;mip-2	Distal	4.098
mip-1;mip-2	Distal	5.052
mip-1;mip-2	Distal	5.021
mip-1;mip-2	Distal	5.331
mip-1;mip-2	Distal	5.289
mip-1;mip-2	Distal	4.477
mip-1;mip-2	Distal	4.389
mip-1;mip-2	Distal	5.03
mip-1;mip-2	Distal	6.747
mip-1;mip-2	Distal	4.671
mip-1;mip-2	Distal	4.763
mip-1;mip-2	Distal	5.068
mip-1;mip-2	Distal	5.126
mip-1;mip-2	Distal	4.192
mip-1;mip-2	Distal	3.984
mip-1;mip-2	Distal	5.964
mip-1;mip-2	Distal	5.738
