# Supplementary material for: Novel LOTUS-domain proteins are organizational hubs that recruit C. elegans Vasa to germ granules
Source: eLife. 2021 Jul 5;10:e60833. doi: 10.7554/eLife.60833 (PMC8331183; doi:10.7554/eLife.60833)
Supplement: Figure 6—source data 1. [file elife-60833-fig6-data1.xlsx]

## Sheet: Figure_6A
Figure 6A. Quantification of the relative number of perinuclear granules over time (in seconds) of dissected MIP-1::GFP, MIP-2::GFP, and GLH-1::GFP adult germ lines treated with 5% 1,6-hexanediol or egg buffer as a control.
Protein	Treatment	Replicate	0	10	20	30	40	50	60	70	80	90	100	110	120	130	140	150	160	170	180	190
MIP-1	eggbuffer	1	112	120	116	117	121	110	118	121	115	130	111	114	115	101	101	121	114	109	103	106
MIP-1	eggbuffer	2	146	143	151	146	147	133	139	136	132	130	129	133	129	119	111	118	105	118	100	110
MIP-1	eggbuffer	3	174	150	139	128	105	111	88	95	77	69	69	64	64	51	50	43	45	33	44	40
MIP-1	eggbuffer	4	154	174	175	164	162	149	159	147	139	149	162	141	151	130	132	122	123	122	112	104
MIP-1	eggbuffer	5	168	171	163	153	164	161	123	132	132	121	119	118	106	101	89	79	87	78	72	65
MIP-1	hexanediol	1	106	113	134	32	19	16	23	21	21	16	12	16	13	16	15	13	17	15	13	14
MIP-1	hexanediol	2	59	58	83	45	34	28	33	33	29	36	30	37	35	32	44	36	46	37	46	40
MIP-1	hexanediol	3	296	304	276	286	273	268	275	268	281	270	247	226	206	221	211	208	202	187	189	183
MIP-1	hexanediol	4	184	193	187	47	27	16	9	6	3	5	4	3	3	2	1	1	2	2	1	1
MIP-1	hexanediol	5	239	231	251	101	100	107	104	80	62	58	53	43	40	34	34	35	26	28	18	30
MIP-1	hexanediol	6	425	459	478	449	411	396	368	368	347	313	278	253	240	204	206	174	170	155	163	134
MIP-2	eggbuffer	1	251	259	237	239	244	238	228	230	210	220	219	224	211	215	216	207	193	185	200	194
MIP-2	eggbuffer	2	92	95	83	88	82	75	71	71	72	61	63	62	63	62	61	55	53	54	52	47
MIP-2	eggbuffer	3	105	102	108	108	102	97	105	98	104	103	102	100	93	103	100	101	102	97	104	94
MIP-2	eggbuffer	4	103	96	97	70	61	44	42	40	41	39	52	75	73	70	73	72	67	62	64	66
MIP-2	eggbuffer	5	45	41	37	35	34	31	26	22	23	19	18	14	16	13	12	15	13	7	10	9
MIP-2	eggbuffer	6	256	251	248	251	255	251	256	239	250	254	243	242	242	245	244	247	238	237	238	228
MIP-2	eggbuffer	7	277	287	273	266	262	280	281	272	258	276	263	270	259	262	254	259	246	242	250	255
MIP-2	eggbuffer	8	232	243	235	253	244	231	241	227	246	233	237	230	228	230	219	222	221	218	211	211
MIP-2	eggbuffer	9	223	231	230	232	221	227	224	229	224	215	228	215	219	231	225	224	222	229	223	229
MIP-2	hexanediol	1	185	186	200	209	204	206	207	205	207	199	199	193	183	182	174	163	166	163	159	159
MIP-2	hexanediol	2	114	121	112	109	110	122	111	108	101	113	103	107	103	107	99	105	101	96	93	100
MIP-2	hexanediol	3	307	302	314	279	271	283	273	257	239	217	192	174	146	131	105	97	72	66	58	41
MIP-2	hexanediol	4	228	227	238	232	225	231	232	220	213	206	196	188	170	159	148	129	122	109	97	87
MIP-2	hexanediol	5	441	447	440	416	423	406	378	396	373	362	350	347	349	337	321	313	299	310	298	290
MIP-2	hexanediol	6	333	334	290	285	300	308	298	304	284	279	270	252	239	230	220	200	196	182	170	162
MIP-2	hexanediol	7	540	552	508	488	482	506	497	488	483	481	462	480	469	444	418	441	429	427	404	401
MIP-2	hexanediol	8	231	245	236	99	58	37	26	17	18	9	9	5	3	2	0	0	0	0	0	0
MIP-2	hexanediol	9	64	61	50	0	0	0	0	0	0	0	0	0	0	0	0	0	0	0	0	0
GLH-1	eggbuffer	1	1512	1497	1484	1447	1438	1368	1423	1374	1361	1367	1310	1318	1303	1246	1171	1177	1141	1178	1158	1143
GLH-1	eggbuffer	2	1180	1149	1260	1226	1290	1260	1276	1254	1179	1258	1215	1225	1225	1232	1253	1257	1193	1108	1237	1183
GLH-1	eggbuffer	3	1310	1276	1279	1280	1262	1295	1278	1268	1257	1248	1298	1292	1259	1252	1246	1266	1261	1235	1250	1246
GLH-1	eggbuffer	4	528	512	507	514	483	482	484	464	467	449	449	434	427	415	409	376	374	355	348	330
GLH-1	eggbuffer	5	264	232	212	205	180	172	153	151	147	145	151	148	137	144	154	149	152	143	141	131
GLH-1	eggbuffer	6	183	185	182	177	187	176	170	177	185	178	176	174	157	156	160	143	145	141	134	120
GLH-1	eggbuffer	7	230	223	225	209	213	195	172	168	159	146	123	113	103	91	86	75	62	60	55	45
GLH-1	eggbuffer	8	676	666	632	663	660	656	644	652	625	626	629	622	613	610	605	603	592	582	568	573
GLH-1	hexanediol	1	566	520	476	426	383	351	313	263	225	191	159	132	115	94	66	47	29	23	5	3
GLH-1	hexanediol	2	612	545	546	500	482	435	406	381	360	330	312	280	246	235	227	176	184	161	163	162
GLH-1	hexanediol	3	79	77	68	15	22	23	15	23	16	12	9	7	9	9	9	5	6	5	5	1
GLH-1	hexanediol	4	515	518	518	510	491	485	474	473	482	477	466	447	444	440	445	418	416	429	423	399
GLH-1	hexanediol	5	354	352	333	295	254	209	192	145	120	81	66	49	44	51	52	51	55	61	70	70
GLH-1	hexanediol	6	128	117	106	101	89	84	72	76	65	61	49	43	17	6	7	4	4	3	2	1
GLH-1	hexanediol	7	307	249	231	191	165	126	112	96	64	47	39	30	16	16	10	5	2	2	0	2
GLH-1	hexanediol	8	55	47	50	46	36	35	30	26	30	24	22	17	13	9	10	5	2	3	1	2

## Sheet: Figure_6B.1
Figure 6B.1. FRAP of individual P granules in P1 cells of 2-cell and P3 cells of 8- to 12-cell embryos carrying individual GFP-tagged P granule proteins. Units for Time: seconds.
Protein	Cell	Replicate	Time	Intensity
GLH-1	P1	1	-1	1
GLH-1	P1	1	0	0.072
GLH-1	P1	1	0.506	0.11
GLH-1	P1	1	1.005	0.144
GLH-1	P1	1	1.505	0.173
GLH-1	P1	1	2.007	0.198
GLH-1	P1	1	2.506	0.212
GLH-1	P1	1	3.006	0.234
GLH-1	P1	1	3.505	0.261
GLH-1	P1	1	4.013	0.283
GLH-1	P1	1	4.505	0.297
GLH-1	P1	1	5.013	0.314
GLH-1	P1	1	5.504	0.342
GLH-1	P1	1	6.012	0.357
GLH-1	P1	1	6.506	0.376
GLH-1	P1	1	7.014	0.393
GLH-1	P1	1	7.506	0.408
GLH-1	P1	1	8.014	0.425
GLH-1	P1	1	8.505	0.444
GLH-1	P1	1	9.013	0.467
GLH-1	P1	1	9.505	0.476
GLH-1	P1	1	10.007	0.498
GLH-1	P1	1	10.506	0.511
GLH-1	P1	1	11.005	0.524
GLH-1	P1	1	11.505	0.532
GLH-1	P1	1	12.013	0.554
GLH-1	P1	1	12.504	0.566
GLH-1	P1	1	13.012	0.572
GLH-1	P1	1	13.506	0.582
GLH-1	P1	1	14.014	0.592
GLH-1	P1	1	14.506	0.589
GLH-1	P1	1	15.014	0.606
GLH-1	P1	1	15.505	0.61
GLH-1	P1	1	16.013	0.623
GLH-1	P1	1	16.505	0.633
GLH-1	P1	1	17.013	0.644
GLH-1	P1	1	17.504	0.659
GLH-1	P1	1	18.006	0.672
GLH-1	P1	1	18.505	0.677
GLH-1	P1	1	19.007	0.703
GLH-1	P1	1	19.504	0.694
GLH-1	P1	1	20.012	0.727
GLH-1	P1	1	20.506	0.713
GLH-1	P1	1	21.006	0.747
GLH-1	P1	1	21.505	0.744
GLH-1	P1	1	22.013	0.769
GLH-1	P1	1	22.505	0.741
GLH-1	P1	1	23.013	0.756
GLH-1	P1	1	23.504	0.768
GLH-1	P1	1	24.012	0.773
GLH-1	P1	1	24.504	0.789
GLH-1	P1	1	25.006	0.794
GLH-1	P1	1	25.505	0.813
GLH-1	P1	1	26.007	0.814
GLH-1	P1	1	26.505	0.816
GLH-1	P1	1	27.005	0.817
GLH-1	P1	1	27.505	0.817
GLH-1	P1	1	28.007	0.823
GLH-1	P1	1	28.506	0.823
GLH-1	P1	1	29.006	0.841
GLH-1	P1	1	29.505	0.844
GLH-1	P1	1	30.013	0.85
GLH-1	P1	1	30.505	0.838
GLH-1	P1	1	31.013	0.858
GLH-1	P1	1	31.504	0.843
GLH-1	P1	1	32.012	0.842
GLH-1	P1	1	32.506	0.849
GLH-1	P1	1	33.014	0.859
GLH-1	P1	1	33.506	0.858
GLH-1	P1	1	34.014	0.868
GLH-1	P1	1	34.505	0.867
GLH-1	P1	1	35.007	0.889
GLH-1	P1	1	35.506	0.892
GLH-1	P1	1	36.006	0.891
GLH-1	P1	1	36.505	0.914
GLH-1	P1	1	37.007	0.897
GLH-1	P1	1	37.504	0.912
GLH-1	P1	1	38.012	0.935
GLH-1	P1	1	38.506	0.942
GLH-1	P1	1	39.014	0.951
GLH-1	P1	1	39.506	0.951
GLH-1	P1	1	40.014	0.972
GLH-1	P1	1	40.505	0.972
GLH-1	P1	1	41.013	0.97
GLH-1	P1	1	41.505	0.961
GLH-1	P1	1	42.013	0.986
GLH-1	P1	1	42.504	0.962
GLH-1	P1	1	43.006	0.95
GLH-1	P1	1	43.505	0.955
GLH-1	P1	1	44.007	0.966
GLH-1	P1	1	44.506	0.967
GLH-1	P1	1	45.006	0.962
GLH-1	P1	1	45.505	0.97
GLH-1	P1	1	46.013	0.98
GLH-1	P1	1	46.505	0.98
GLH-1	P1	1	47.013	0.985
GLH-1	P1	1	47.504	0.984
GLH-1	P1	1	48.012	0.983
GLH-1	P1	1	48.506	0.993
GLH-1	P1	1	49.014	0.984
GLH-1	P1	1	49.506	0.972
GLH-1	P1	1	50.014	0.984
GLH-1	P1	1	50.505	0.99
GLH-1	P1	1	51.013	0.988
GLH-1	P1	1	51.505	0.98
GLH-1	P1	1	52.007	0.964
GLH-1	P1	1	52.505	0.973
GLH-1	P1	1	53.005	0.976
GLH-1	P1	1	53.505	0.967
GLH-1	P1	1	54.013	0.98
GLH-1	P1	1	54.504	0.965
GLH-1	P1	1	55.012	0.967
GLH-1	P1	1	55.506	0.957
GLH-1	P1	1	56.014	0.934
GLH-1	P1	1	56.506	0.956
GLH-1	P1	1	57.014	0.942
GLH-1	P1	2	-1	1
GLH-1	P1	2	0	0.152
GLH-1	P1	2	0.506	0.206
GLH-1	P1	2	1.005	0.239
GLH-1	P1	2	1.505	0.263
GLH-1	P1	2	2.007	0.268
GLH-1	P1	2	2.506	0.293
GLH-1	P1	2	3.006	0.31
GLH-1	P1	2	3.505	0.332
GLH-1	P1	2	4.013	0.347
GLH-1	P1	2	4.505	0.373
GLH-1	P1	2	5.013	0.393
GLH-1	P1	2	5.504	0.409
GLH-1	P1	2	6.012	0.418
GLH-1	P1	2	6.506	0.431
GLH-1	P1	2	7.014	0.439
GLH-1	P1	2	7.506	0.438
GLH-1	P1	2	8.014	0.47
GLH-1	P1	2	8.505	0.474
GLH-1	P1	2	9.013	0.483
GLH-1	P1	2	9.505	0.5
GLH-1	P1	2	10.007	0.492
GLH-1	P1	2	10.504	0.517
GLH-1	P1	2	11.012	0.505
GLH-1	P1	2	11.506	0.52
GLH-1	P1	2	12.005	0.52
GLH-1	P1	2	12.505	0.529
GLH-1	P1	2	13.013	0.531
GLH-1	P1	2	13.504	0.55
GLH-1	P1	2	14.013	0.548
GLH-1	P1	2	14.504	0.561
GLH-1	P1	2	15.012	0.56
GLH-1	P1	2	15.506	0.56
GLH-1	P1	2	16.014	0.572
GLH-1	P1	2	16.505	0.578
GLH-1	P1	2	17.014	0.599
GLH-1	P1	2	17.505	0.603
GLH-1	P1	2	18.007	0.605
GLH-1	P1	2	18.506	0.622
GLH-1	P1	2	19.005	0.625
GLH-1	P1	2	19.505	0.63
GLH-1	P1	2	20.013	0.628
GLH-1	P1	2	20.504	0.606
GLH-1	P1	2	21.012	0.639
GLH-1	P1	2	21.504	0.652
GLH-1	P1	2	22.012	0.645
GLH-1	P1	2	22.506	0.617
GLH-1	P1	2	23.014	0.629
GLH-1	P1	2	23.505	0.654
GLH-1	P1	2	24.014	0.648
GLH-1	P1	2	24.505	0.65
GLH-1	P1	2	25.013	0.684
GLH-1	P1	2	25.504	0.644
GLH-1	P1	2	26.006	0.65
GLH-1	P1	2	26.505	0.642
GLH-1	P1	2	27.007	0.67
GLH-1	P1	2	27.506	0.687
GLH-1	P1	2	28.006	0.67
GLH-1	P1	2	28.505	0.699
GLH-1	P1	2	29.013	0.683
GLH-1	P1	2	29.505	0.692
GLH-1	P1	2	30.013	0.691
GLH-1	P1	2	30.504	0.683
GLH-1	P1	2	31.012	0.694
GLH-1	P1	2	31.504	0.694
GLH-1	P1	2	32.012	0.695
GLH-1	P1	2	32.506	0.724
GLH-1	P1	2	33.014	0.714
GLH-1	P1	2	33.505	0.732
GLH-1	P1	2	34.013	0.754
GLH-1	P1	2	34.505	0.757
GLH-1	P1	2	35.007	0.767
GLH-1	P1	2	35.506	0.761
GLH-1	P1	2	36.005	0.793
GLH-1	P1	2	36.505	0.778
GLH-1	P1	2	37.013	0.808
GLH-1	P1	2	37.504	0.814
GLH-1	P1	2	38.012	0.834
GLH-1	P1	2	38.504	0.808
GLH-1	P1	2	39.012	0.858
GLH-1	P1	2	39.506	0.859
GLH-1	P1	2	40.014	0.851
GLH-1	P1	2	40.505	0.869
GLH-1	P1	2	41.013	0.862
GLH-1	P1	2	41.505	0.851
GLH-1	P1	2	42.013	0.827
GLH-1	P1	2	42.504	0.896
GLH-1	P1	2	43.006	0.887
GLH-1	P1	2	43.505	0.886
GLH-1	P1	2	44.007	0.874
GLH-1	P1	2	44.504	0.921
GLH-1	P1	2	45.012	0.902
GLH-1	P1	2	45.506	0.891
GLH-1	P1	2	46.006	0.916
GLH-1	P1	2	46.505	0.907
GLH-1	P1	2	47.013	0.904
GLH-1	P1	2	47.505	0.903
GLH-1	P1	2	48.013	0.908
GLH-1	P1	2	48.504	0.923
GLH-1	P1	2	49.012	0.957
GLH-1	P1	2	49.504	0.955
GLH-1	P1	2	50.006	0.962
GLH-1	P1	2	50.505	0.972
GLH-1	P1	2	51.007	0.974
GLH-1	P1	2	51.506	0.944
GLH-1	P1	2	52.005	0.939
GLH-1	P1	2	52.505	0.932
GLH-1	P1	2	53.007	0.923
GLH-1	P1	2	53.506	0.936
GLH-1	P1	2	54.006	0.906
GLH-1	P1	2	54.505	0.937
GLH-1	P1	2	55.013	0.974
GLH-1	P1	2	55.505	0.997
GLH-1	P1	2	56.013	0.975
GLH-1	P1	2	56.504	0.925
GLH-1	P1	2	57.012	0.974
GLH-1	P1	3	-1	1
GLH-1	P1	3	0	0.039
GLH-1	P1	3	0.506	0.064
GLH-1	P1	3	1.005	0.083
GLH-1	P1	3	1.506	0.104
GLH-1	P1	3	2.005	0.12
GLH-1	P1	3	2.513	0.136
GLH-1	P1	3	3.005	0.152
GLH-1	P1	3	3.513	0.167
GLH-1	P1	3	4.004	0.176
GLH-1	P1	3	4.506	0.198
GLH-1	P1	3	5.005	0.213
GLH-1	P1	3	5.507	0.227
GLH-1	P1	3	6.004	0.241
GLH-1	P1	3	6.512	0.254
GLH-1	P1	3	7.006	0.264
GLH-1	P1	3	7.506	0.282
GLH-1	P1	3	8.005	0.284
GLH-1	P1	3	8.513	0.301
GLH-1	P1	3	9.005	0.316
GLH-1	P1	3	9.513	0.325
GLH-1	P1	3	10.004	0.33
GLH-1	P1	3	10.512	0.344
GLH-1	P1	3	11.006	0.349
GLH-1	P1	3	11.514	0.36
GLH-1	P1	3	12.006	0.367
GLH-1	P1	3	12.514	0.373
GLH-1	P1	3	13.005	0.393
GLH-1	P1	3	13.507	0.402
GLH-1	P1	3	14.006	0.412
GLH-1	P1	3	14.506	0.422
GLH-1	P1	3	15.005	0.431
GLH-1	P1	3	15.513	0.455
GLH-1	P1	3	16.005	0.458
GLH-1	P1	3	16.513	0.461
GLH-1	P1	3	17.004	0.458
GLH-1	P1	3	17.512	0.479
GLH-1	P1	3	18.006	0.486
GLH-1	P1	3	18.514	0.497
GLH-1	P1	3	19.006	0.509
GLH-1	P1	3	19.514	0.515
GLH-1	P1	3	20.005	0.515
GLH-1	P1	3	20.513	0.542
GLH-1	P1	3	21.005	0.55
GLH-1	P1	3	21.507	0.553
GLH-1	P1	3	22.006	0.572
GLH-1	P1	3	22.505	0.588
GLH-1	P1	3	23.005	0.578
GLH-1	P1	3	23.513	0.603
GLH-1	P1	3	24.004	0.608
GLH-1	P1	3	24.512	0.619
GLH-1	P1	3	25.006	0.629
GLH-1	P1	3	25.514	0.618
GLH-1	P1	3	26.006	0.624
GLH-1	P1	3	26.514	0.642
GLH-1	P1	3	27.005	0.649
GLH-1	P1	3	27.513	0.655
GLH-1	P1	3	28.005	0.662
GLH-1	P1	3	28.513	0.673
GLH-1	P1	3	29.004	0.676
GLH-1	P1	3	29.506	0.686
GLH-1	P1	3	30.005	0.716
GLH-1	P1	3	30.507	0.732
GLH-1	P1	3	31.006	0.742
GLH-1	P1	3	31.505	0.738
GLH-1	P1	3	32.005	0.751
GLH-1	P1	3	32.513	0.76
GLH-1	P1	3	33.005	0.763
GLH-1	P1	3	33.513	0.772
GLH-1	P1	3	34.004	0.764
GLH-1	P1	3	34.512	0.772
GLH-1	P1	3	35.006	0.788
GLH-1	P1	3	35.514	0.793
GLH-1	P1	3	36.006	0.791
GLH-1	P1	3	36.514	0.798
GLH-1	P1	3	37.005	0.798
GLH-1	P1	3	37.513	0.815
GLH-1	P1	3	38.005	0.836
GLH-1	P1	3	38.507	0.839
GLH-1	P1	3	39.005	0.84
GLH-1	P1	3	39.507	0.856
GLH-1	P1	3	40.005	0.849
GLH-1	P1	3	40.513	0.862
GLH-1	P1	3	41.004	0.856
GLH-1	P1	3	41.512	0.844
GLH-1	P1	3	42.006	0.845
GLH-1	P1	3	42.514	0.867
GLH-1	P1	3	43.006	0.873
GLH-1	P1	3	43.514	0.876
GLH-1	P1	3	44.005	0.876
GLH-1	P1	3	44.513	0.869
GLH-1	P1	3	45.005	0.864
GLH-1	P1	3	45.513	0.899
GLH-1	P1	3	46.004	0.906
GLH-1	P1	3	46.506	0.909
GLH-1	P1	3	47.006	0.905
GLH-1	P1	3	47.505	0.89
GLH-1	P1	3	48.005	0.893
GLH-1	P1	3	48.513	0.893
GLH-1	P1	3	49.004	0.909
GLH-1	P1	3	49.512	0.903
GLH-1	P1	3	50.006	0.934
GLH-1	P1	3	50.514	0.913
GLH-1	P1	3	51.006	0.902
GLH-1	P1	3	51.514	0.913
GLH-1	P1	3	52.005	0.888
GLH-1	P1	3	52.513	0.909
GLH-1	P1	3	53.005	0.896
GLH-1	P1	3	53.513	0.899
GLH-1	P1	3	54.004	0.916
GLH-1	P1	3	54.506	0.901
GLH-1	P1	3	55.005	0.888
GLH-1	P1	3	55.507	0.893
GLH-1	P1	3	56.006	0.891
GLH-1	P1	3	56.506	0.889
GLH-1	P1	3	57.005	0.907
GLH-1	P1	4	-1	1
GLH-1	P1	4	0	0.234
GLH-1	P1	4	0.506	0.278
GLH-1	P1	4	1.005	0.304
GLH-1	P1	4	1.507	0.321
GLH-1	P1	4	2.004	0.335
GLH-1	P1	4	2.512	0.34
GLH-1	P1	4	3.006	0.356
GLH-1	P1	4	3.514	0.349
GLH-1	P1	4	4.006	0.373
GLH-1	P1	4	4.514	0.388
GLH-1	P1	4	5.005	0.37
GLH-1	P1	4	5.513	0.343
GLH-1	P1	4	6.005	0.365
GLH-1	P1	4	6.513	0.376
GLH-1	P1	4	7.004	0.382
GLH-1	P1	4	7.506	0.395
GLH-1	P1	4	8.005	0.402
GLH-1	P1	4	8.507	0.403
GLH-1	P1	4	9.006	0.421
GLH-1	P1	4	9.505	0.431
GLH-1	P1	4	10.005	0.444
GLH-1	P1	4	10.513	0.449
GLH-1	P1	4	11.004	0.44
GLH-1	P1	4	11.513	0.453
GLH-1	P1	4	12.004	0.477
GLH-1	P1	4	12.512	0.495
GLH-1	P1	4	13.006	0.503
GLH-1	P1	4	13.514	0.521
GLH-1	P1	4	14.005	0.522
GLH-1	P1	4	14.514	0.522
GLH-1	P1	4	15.005	0.53
GLH-1	P1	4	15.513	0.544
GLH-1	P1	4	16.005	0.53
GLH-1	P1	4	16.507	0.536
GLH-1	P1	4	17.005	0.528
GLH-1	P1	4	17.507	0.537
GLH-1	P1	4	18.006	0.553
GLH-1	P1	4	18.506	0.544
GLH-1	P1	4	19.005	0.577
GLH-1	P1	4	19.513	0.578
GLH-1	P1	4	20.005	0.593
GLH-1	P1	4	20.513	0.611
GLH-1	P1	4	21.004	0.615
GLH-1	P1	4	21.512	0.635
GLH-1	P1	4	22.004	0.641
GLH-1	P1	4	22.512	0.648
GLH-1	P1	4	23.006	0.652
GLH-1	P1	4	23.514	0.669
GLH-1	P1	4	24.005	0.682
GLH-1	P1	4	24.513	0.703
GLH-1	P1	4	25.005	0.719
GLH-1	P1	4	25.507	0.706
GLH-1	P1	4	26.006	0.709
GLH-1	P1	4	26.505	0.703
GLH-1	P1	4	27.005	0.728
GLH-1	P1	4	27.513	0.739
GLH-1	P1	4	28.004	0.744
GLH-1	P1	4	28.512	0.771
GLH-1	P1	4	29.004	0.784
GLH-1	P1	4	29.512	0.785
GLH-1	P1	4	30.006	0.79
GLH-1	P1	4	30.514	0.794
GLH-1	P1	4	31.005	0.782
GLH-1	P1	4	31.513	0.791
GLH-1	P1	4	32.005	0.797
GLH-1	P1	4	32.513	0.793
GLH-1	P1	4	33.004	0.803
GLH-1	P1	4	33.506	0.824
GLH-1	P1	4	34.006	0.818
GLH-1	P1	4	34.505	0.812
GLH-1	P1	4	35.005	0.834
GLH-1	P1	4	35.513	0.853
GLH-1	P1	4	36.005	0.855
GLH-1	P1	4	36.513	0.877
GLH-1	P1	4	37.004	0.882
GLH-1	P1	4	37.512	0.886
GLH-1	P1	4	38.006	0.902
GLH-1	P1	4	38.514	0.89
GLH-1	P1	4	39.006	0.894
GLH-1	P1	4	39.514	0.892
GLH-1	P1	4	40.005	0.884
GLH-1	P1	4	40.513	0.874
GLH-1	P1	4	41.005	0.868
GLH-1	P1	4	41.507	0.858
GLH-1	P1	4	42.005	0.859
GLH-1	P1	4	42.507	0.874
GLH-1	P1	4	43.004	0.868
GLH-1	P1	4	43.512	0.872
GLH-1	P1	4	44.006	0.885
GLH-1	P1	4	44.505	0.891
GLH-1	P1	4	45.005	0.913
GLH-1	P1	4	45.513	0.914
GLH-1	P1	4	46.004	0.909
GLH-1	P1	4	46.512	0.912
GLH-1	P1	4	47.004	0.903
GLH-1	P1	4	47.512	0.899
GLH-1	P1	4	48.006	0.884
GLH-1	P1	4	48.514	0.899
GLH-1	P1	4	49.005	0.892
GLH-1	P1	4	49.513	0.903
GLH-1	P1	4	50.005	0.909
GLH-1	P1	4	50.507	0.909
GLH-1	P1	4	51.006	0.9
GLH-1	P1	4	51.505	0.916
GLH-1	P1	4	52.005	0.922
GLH-1	P1	4	52.513	0.919
GLH-1	P1	4	53.004	0.913
GLH-1	P1	4	53.512	0.906
GLH-1	P1	4	54.004	0.892
GLH-1	P1	4	54.512	0.907
GLH-1	P1	4	55.006	0.91
GLH-1	P1	4	55.514	0.919
GLH-1	P1	4	56.005	0.923
GLH-1	P1	4	56.513	0.925
GLH-1	P1	4	57.005	0.925
GLH-1	P1	5	-1	1
GLH-1	P1	5	0	0.025
GLH-1	P1	5	0.506	0.064
GLH-1	P1	5	1.005	0.089
GLH-1	P1	5	1.505	0.11
GLH-1	P1	5	2.007	0.135
GLH-1	P1	5	2.506	0.15
GLH-1	P1	5	3.006	0.171
GLH-1	P1	5	3.505	0.189
GLH-1	P1	5	4.013	0.208
GLH-1	P1	5	4.505	0.229
GLH-1	P1	5	5.013	0.239
GLH-1	P1	5	5.504	0.25
GLH-1	P1	5	6.012	0.265
GLH-1	P1	5	6.506	0.273
GLH-1	P1	5	7.014	0.283
GLH-1	P1	5	7.506	0.298
GLH-1	P1	5	8.014	0.308
GLH-1	P1	5	8.505	0.319
GLH-1	P1	5	9.013	0.337
GLH-1	P1	5	9.505	0.347
GLH-1	P1	5	10.007	0.348
GLH-1	P1	5	10.506	0.356
GLH-1	P1	5	11.005	0.356
GLH-1	P1	5	11.505	0.357
GLH-1	P1	5	12.013	0.374
GLH-1	P1	5	12.504	0.368
GLH-1	P1	5	13.012	0.372
GLH-1	P1	5	13.506	0.391
GLH-1	P1	5	14.014	0.394
GLH-1	P1	5	14.506	0.417
GLH-1	P1	5	15.014	0.431
GLH-1	P1	5	15.505	0.432
GLH-1	P1	5	16.013	0.434
GLH-1	P1	5	16.505	0.449
GLH-1	P1	5	17.013	0.454
GLH-1	P1	5	17.504	0.472
GLH-1	P1	5	18.006	0.462
GLH-1	P1	5	18.505	0.467
GLH-1	P1	5	19.007	0.478
GLH-1	P1	5	19.506	0.499
GLH-1	P1	5	20.006	0.508
GLH-1	P1	5	20.505	0.51
GLH-1	P1	5	21.013	0.517
GLH-1	P1	5	21.505	0.529
GLH-1	P1	5	22.013	0.566
GLH-1	P1	5	22.504	0.564
GLH-1	P1	5	23.012	0.602
GLH-1	P1	5	23.506	0.625
GLH-1	P1	5	24.014	0.632
GLH-1	P1	5	24.506	0.649
GLH-1	P1	5	25.014	0.679
GLH-1	P1	5	25.505	0.669
GLH-1	P1	5	26.013	0.68
GLH-1	P1	5	26.505	0.677
GLH-1	P1	5	27.007	0.703
GLH-1	P1	5	27.505	0.727
GLH-1	P1	5	28.007	0.733
GLH-1	P1	5	28.504	0.733
GLH-1	P1	5	29.012	0.754
GLH-1	P1	5	29.506	0.745
GLH-1	P1	5	30.014	0.772
GLH-1	P1	5	30.505	0.774
GLH-1	P1	5	31.013	0.778
GLH-1	P1	5	31.505	0.767
GLH-1	P1	5	32.013	0.781
GLH-1	P1	5	32.504	0.772
GLH-1	P1	5	33.012	0.789
GLH-1	P1	5	33.504	0.803
GLH-1	P1	5	34.006	0.824
GLH-1	P1	5	34.505	0.832
GLH-1	P1	5	35.007	0.87
GLH-1	P1	5	35.506	0.899
GLH-1	P1	5	36.005	0.893
GLH-1	P1	5	36.505	0.848
GLH-1	P1	5	37.013	0.821
GLH-1	P1	5	37.504	0.803
GLH-1	P1	5	38.012	0.765
GLH-1	P1	5	38.506	0.764
GLH-1	P1	5	39.014	0.77
GLH-1	P1	5	39.506	0.785
GLH-1	P1	5	40.014	0.79
GLH-1	P1	5	40.505	0.811
GLH-1	P1	5	41.013	0.794
GLH-1	P1	5	41.505	0.811
GLH-1	P1	5	42.013	0.792
GLH-1	P1	5	42.504	0.802
GLH-1	P1	5	43.006	0.766
GLH-1	P1	5	43.505	0.749
GLH-1	P1	5	44.007	0.745
GLH-1	P1	5	44.506	0.699
GLH-1	P1	5	45.005	0.692
GLH-1	P1	5	45.505	0.77
GLH-1	P1	5	46.013	0.79
GLH-1	P1	5	46.505	0.755
GLH-1	P1	5	47.013	0.788
GLH-1	P1	5	47.504	0.803
GLH-1	P1	5	48.012	0.801
GLH-1	P1	5	48.506	0.836
GLH-1	P1	5	49.014	0.832
GLH-1	P1	5	49.506	0.867
GLH-1	P1	5	50.014	0.91
GLH-1	P1	5	50.505	0.939
GLH-1	P1	5	51.013	0.975
GLH-1	P1	5	51.505	0.998
GLH-1	P1	5	52.007	0.983
GLH-1	P1	5	52.505	0.963
GLH-1	P1	5	53.007	0.964
GLH-1	P1	5	53.504	0.969
GLH-1	P1	5	54.012	0.969
GLH-1	P1	5	54.506	0.969
GLH-1	P1	5	55.005	0.989
GLH-1	P1	5	55.505	0.978
GLH-1	P1	5	56.013	0.97
GLH-1	P1	5	56.504	1.002
GLH-1	P1	5	57.012	0.976
GLH-1	P1	6	-1	1
GLH-1	P1	6	0	0.052
GLH-1	P1	6	0.506	0.077
GLH-1	P1	6	1.005	0.097
GLH-1	P1	6	1.505	0.118
GLH-1	P1	6	2.013	0.124
GLH-1	P1	6	2.504	0.149
GLH-1	P1	6	3.012	0.163
GLH-1	P1	6	3.506	0.174
GLH-1	P1	6	4.014	0.185
GLH-1	P1	6	4.506	0.198
GLH-1	P1	6	5.014	0.217
GLH-1	P1	6	5.505	0.233
GLH-1	P1	6	6.013	0.245
GLH-1	P1	6	6.505	0.254
GLH-1	P1	6	7.007	0.265
GLH-1	P1	6	7.505	0.282
GLH-1	P1	6	8.005	0.299
GLH-1	P1	6	8.505	0.304
GLH-1	P1	6	9.013	0.311
GLH-1	P1	6	9.504	0.325
GLH-1	P1	6	10.012	0.333
GLH-1	P1	6	10.506	0.341
GLH-1	P1	6	11.014	0.349
GLH-1	P1	6	11.506	0.359
GLH-1	P1	6	12.014	0.378
GLH-1	P1	6	12.505	0.395
GLH-1	P1	6	13.013	0.4
GLH-1	P1	6	13.505	0.417
GLH-1	P1	6	14.013	0.426
GLH-1	P1	6	14.504	0.445
GLH-1	P1	6	15.006	0.455
GLH-1	P1	6	15.505	0.458
GLH-1	P1	6	16.007	0.473
GLH-1	P1	6	16.506	0.486
GLH-1	P1	6	17.005	0.499
GLH-1	P1	6	17.505	0.51
GLH-1	P1	6	18.013	0.513
GLH-1	P1	6	18.504	0.533
GLH-1	P1	6	19.012	0.547
GLH-1	P1	6	19.504	0.55
GLH-1	P1	6	20.012	0.551
GLH-1	P1	6	20.506	0.56
GLH-1	P1	6	21.014	0.567
GLH-1	P1	6	21.505	0.583
GLH-1	P1	6	22.014	0.587
GLH-1	P1	6	22.505	0.61
GLH-1	P1	6	23.013	0.625
GLH-1	P1	6	23.504	0.627
GLH-1	P1	6	24.006	0.639
GLH-1	P1	6	24.505	0.638
GLH-1	P1	6	25.007	0.649
GLH-1	P1	6	25.504	0.644
GLH-1	P1	6	26.012	0.659
GLH-1	P1	6	26.504	0.655
GLH-1	P1	6	27.012	0.671
GLH-1	P1	6	27.506	0.686
GLH-1	P1	6	28.014	0.692
GLH-1	P1	6	28.505	0.686
GLH-1	P1	6	29.013	0.701
GLH-1	P1	6	29.505	0.715
GLH-1	P1	6	30.013	0.724
GLH-1	P1	6	30.504	0.72
GLH-1	P1	6	31.013	0.732
GLH-1	P1	6	31.504	0.73
GLH-1	P1	6	32.006	0.745
GLH-1	P1	6	32.506	0.745
GLH-1	P1	6	33.005	0.749
GLH-1	P1	6	33.505	0.764
GLH-1	P1	6	34.013	0.764
GLH-1	P1	6	34.504	0.776
GLH-1	P1	6	35.012	0.792
GLH-1	P1	6	35.506	0.786
GLH-1	P1	6	36.014	0.801
GLH-1	P1	6	36.506	0.816
GLH-1	P1	6	37.014	0.819
GLH-1	P1	6	37.505	0.819
GLH-1	P1	6	38.013	0.826
GLH-1	P1	6	38.505	0.83
GLH-1	P1	6	39.013	0.839
GLH-1	P1	6	39.504	0.843
GLH-1	P1	6	40.006	0.842
GLH-1	P1	6	40.505	0.856
GLH-1	P1	6	41.007	0.846
GLH-1	P1	6	41.506	0.86
GLH-1	P1	6	42.005	0.866
GLH-1	P1	6	42.505	0.866
GLH-1	P1	6	43.013	0.868
GLH-1	P1	6	43.504	0.873
GLH-1	P1	6	44.013	0.875
GLH-1	P1	6	44.504	0.887
GLH-1	P1	6	45.012	0.885
GLH-1	P1	6	45.506	0.897
GLH-1	P1	6	46.014	0.899
GLH-1	P1	6	46.505	0.901
GLH-1	P1	6	47.014	0.924
GLH-1	P1	6	47.505	0.897
GLH-1	P1	6	48.013	0.904
GLH-1	P1	6	48.505	0.917
GLH-1	P1	6	49.007	0.905
GLH-1	P1	6	49.505	0.913
GLH-1	P1	6	50.007	0.906
GLH-1	P1	6	50.506	0.898
GLH-1	P1	6	51.006	0.888
GLH-1	P1	6	51.505	0.914
GLH-1	P1	6	52.013	0.898
GLH-1	P1	6	52.505	0.909
GLH-1	P1	6	53.013	0.896
GLH-1	P1	6	53.504	0.905
GLH-1	P1	6	54.012	0.893
GLH-1	P1	6	54.504	0.894
GLH-1	P1	6	55.012	0.894
GLH-1	P1	6	55.506	0.91
GLH-1	P1	6	56.014	0.909
GLH-1	P1	6	56.505	0.919
GLH-1	P1	6	57.013	0.942
GLH-1	P1	7	-1	1
GLH-1	P1	7	0	0.029
GLH-1	P1	7	0.506	0.057
GLH-1	P1	7	1.005	0.073
GLH-1	P1	7	1.504	0.089
GLH-1	P1	7	2.005	0.106
GLH-1	P1	7	2.513	0.118
GLH-1	P1	7	3.007	0.131
GLH-1	P1	7	3.515	0.15
GLH-1	P1	7	4.007	0.164
GLH-1	P1	7	4.515	0.18
GLH-1	P1	7	5.006	0.188
GLH-1	P1	7	5.514	0.202
GLH-1	P1	7	6.006	0.215
GLH-1	P1	7	6.514	0.234
GLH-1	P1	7	7.005	0.243
GLH-1	P1	7	7.505	0.263
GLH-1	P1	7	8.007	0.272
GLH-1	P1	7	8.504	0.274
GLH-1	P1	7	9.006	0.292
GLH-1	P1	7	9.505	0.313
GLH-1	P1	7	10.013	0.313
GLH-1	P1	7	10.504	0.323
GLH-1	P1	7	11.012	0.332
GLH-1	P1	7	11.506	0.347
GLH-1	P1	7	12.014	0.351
GLH-1	P1	7	12.506	0.361
GLH-1	P1	7	13.014	0.372
GLH-1	P1	7	13.505	0.389
GLH-1	P1	7	14.013	0.397
GLH-1	P1	7	14.505	0.406
GLH-1	P1	7	15.007	0.413
GLH-1	P1	7	15.506	0.427
GLH-1	P1	7	16.005	0.449
GLH-1	P1	7	16.505	0.453
GLH-1	P1	7	17.013	0.462
GLH-1	P1	7	17.504	0.478
GLH-1	P1	7	18.012	0.484
GLH-1	P1	7	18.506	0.483
GLH-1	P1	7	19.014	0.494
GLH-1	P1	7	19.506	0.495
GLH-1	P1	7	20.014	0.523
GLH-1	P1	7	20.505	0.536
GLH-1	P1	7	21.013	0.536
GLH-1	P1	7	21.505	0.543
GLH-1	P1	7	22.013	0.54
GLH-1	P1	7	22.504	0.57
GLH-1	P1	7	23.006	0.572
GLH-1	P1	7	23.505	0.583
GLH-1	P1	7	24.007	0.575
GLH-1	P1	7	24.506	0.596
GLH-1	P1	7	25.005	0.608
GLH-1	P1	7	25.505	0.613
GLH-1	P1	7	26.013	0.607
GLH-1	P1	7	26.505	0.621
GLH-1	P1	7	27.013	0.626
GLH-1	P1	7	27.504	0.641
GLH-1	P1	7	28.012	0.645
GLH-1	P1	7	28.506	0.656
GLH-1	P1	7	29.014	0.659
GLH-1	P1	7	29.506	0.653
GLH-1	P1	7	30.014	0.665
GLH-1	P1	7	30.505	0.662
GLH-1	P1	7	31.013	0.667
GLH-1	P1	7	31.505	0.689
GLH-1	P1	7	32.007	0.704
GLH-1	P1	7	32.505	0.701
GLH-1	P1	7	33.007	0.728
GLH-1	P1	7	33.504	0.722
GLH-1	P1	7	34.012	0.729
GLH-1	P1	7	34.506	0.717
GLH-1	P1	7	35.014	0.746
GLH-1	P1	7	35.505	0.759
GLH-1	P1	7	36.013	0.764
GLH-1	P1	7	36.505	0.758
GLH-1	P1	7	37.013	0.747
GLH-1	P1	7	37.504	0.771
GLH-1	P1	7	38.012	0.774
GLH-1	P1	7	38.504	0.788
GLH-1	P1	7	39.006	0.803
GLH-1	P1	7	39.505	0.798
GLH-1	P1	7	40.007	0.818
GLH-1	P1	7	40.506	0.802
GLH-1	P1	7	41.005	0.816
GLH-1	P1	7	41.505	0.805
GLH-1	P1	7	42.013	0.815
GLH-1	P1	7	42.504	0.831
GLH-1	P1	7	43.012	0.826
GLH-1	P1	7	43.506	0.841
GLH-1	P1	7	44.014	0.845
GLH-1	P1	7	44.506	0.852
GLH-1	P1	7	45.014	0.865
GLH-1	P1	7	45.505	0.863
GLH-1	P1	7	46.013	0.861
GLH-1	P1	7	46.505	0.877
GLH-1	P1	7	47.013	0.872
GLH-1	P1	7	47.504	0.876
GLH-1	P1	7	48.006	0.883
GLH-1	P1	7	48.505	0.884
GLH-1	P1	7	49.007	0.889
GLH-1	P1	7	49.506	0.894
GLH-1	P1	7	50.005	0.892
GLH-1	P1	7	50.505	0.911
GLH-1	P1	7	51.013	0.902
GLH-1	P1	7	51.505	0.908
GLH-1	P1	7	52.013	0.908
GLH-1	P1	7	52.504	0.918
GLH-1	P1	7	53.012	0.92
GLH-1	P1	7	53.506	0.91
GLH-1	P1	7	54.014	0.898
GLH-1	P1	7	54.506	0.897
GLH-1	P1	7	55.014	0.918
GLH-1	P1	7	55.505	0.901
GLH-1	P1	7	56.013	0.92
GLH-1	P1	7	56.505	0.931
GLH-1	P1	7	57.007	0.934
GLH-1	P1	8	-1	1
GLH-1	P1	8	0	0.095
GLH-1	P1	8	0.506	0.122
GLH-1	P1	8	1.005	0.146
GLH-1	P1	8	1.506	0.163
GLH-1	P1	8	2.005	0.184
GLH-1	P1	8	2.513	0.201
GLH-1	P1	8	3.005	0.212
GLH-1	P1	8	3.513	0.226
GLH-1	P1	8	4.004	0.24
GLH-1	P1	8	4.506	0.249
GLH-1	P1	8	5.005	0.269
GLH-1	P1	8	5.507	0.283
GLH-1	P1	8	6.006	0.304
GLH-1	P1	8	6.505	0.319
GLH-1	P1	8	7.005	0.332
GLH-1	P1	8	7.507	0.342
GLH-1	P1	8	8.004	0.369
GLH-1	P1	8	8.512	0.379
GLH-1	P1	8	9.006	0.388
GLH-1	P1	8	9.514	0.395
GLH-1	P1	8	10.006	0.408
GLH-1	P1	8	10.514	0.422
GLH-1	P1	8	11.005	0.431
GLH-1	P1	8	11.513	0.439
GLH-1	P1	8	12.005	0.454
GLH-1	P1	8	12.513	0.458
GLH-1	P1	8	13.004	0.467
GLH-1	P1	8	13.506	0.48
GLH-1	P1	8	14.005	0.497
GLH-1	P1	8	14.507	0.501
GLH-1	P1	8	15.006	0.515
GLH-1	P1	8	15.505	0.528
GLH-1	P1	8	16.005	0.53
GLH-1	P1	8	16.513	0.552
GLH-1	P1	8	17.004	0.548
GLH-1	P1	8	17.512	0.559
GLH-1	P1	8	18.004	0.571
GLH-1	P1	8	18.512	0.587
GLH-1	P1	8	19.006	0.594
GLH-1	P1	8	19.514	0.601
GLH-1	P1	8	20.005	0.613
GLH-1	P1	8	20.513	0.623
GLH-1	P1	8	21.005	0.623
GLH-1	P1	8	21.513	0.633
GLH-1	P1	8	22.004	0.639
GLH-1	P1	8	22.506	0.649
GLH-1	P1	8	23.006	0.653
GLH-1	P1	8	23.506	0.658
GLH-1	P1	8	24.005	0.65
GLH-1	P1	8	24.507	0.645
GLH-1	P1	8	25.004	0.652
GLH-1	P1	8	25.512	0.657
GLH-1	P1	8	26.006	0.652
GLH-1	P1	8	26.514	0.646
GLH-1	P1	8	27.006	0.64
GLH-1	P1	8	27.514	0.653
GLH-1	P1	8	28.005	0.661
GLH-1	P1	8	28.513	0.685
GLH-1	P1	8	29.005	0.71
GLH-1	P1	8	29.513	0.719
GLH-1	P1	8	30.004	0.727
GLH-1	P1	8	30.506	0.744
GLH-1	P1	8	31.005	0.753
GLH-1	P1	8	31.507	0.767
GLH-1	P1	8	32.006	0.784
GLH-1	P1	8	32.505	0.78
GLH-1	P1	8	33.005	0.8
GLH-1	P1	8	33.513	0.821
GLH-1	P1	8	34.004	0.822
GLH-1	P1	8	34.513	0.832
GLH-1	P1	8	35.004	0.83
GLH-1	P1	8	35.512	0.842
GLH-1	P1	8	36.006	0.842
GLH-1	P1	8	36.514	0.841
GLH-1	P1	8	37.006	0.855
GLH-1	P1	8	37.514	0.853
GLH-1	P1	8	38.005	0.87
GLH-1	P1	8	38.513	0.845
GLH-1	P1	8	39.005	0.856
GLH-1	P1	8	39.507	0.834
GLH-1	P1	8	40.006	0.865
GLH-1	P1	8	40.506	0.856
GLH-1	P1	8	41.005	0.852
GLH-1	P1	8	41.513	0.864
GLH-1	P1	8	42.005	0.861
GLH-1	P1	8	42.513	0.866
GLH-1	P1	8	43.004	0.866
GLH-1	P1	8	43.512	0.876
GLH-1	P1	8	44.006	0.891
GLH-1	P1	8	44.514	0.882
GLH-1	P1	8	45.006	0.88
GLH-1	P1	8	45.514	0.891
GLH-1	P1	8	46.005	0.899
GLH-1	P1	8	46.513	0.9
GLH-1	P1	8	47.005	0.908
GLH-1	P1	8	47.507	0.899
GLH-1	P1	8	48.006	0.911
GLH-1	P1	8	48.505	0.885
GLH-1	P1	8	49.005	0.874
GLH-1	P1	8	49.513	0.885
GLH-1	P1	8	50.004	0.911
GLH-1	P1	8	50.512	0.917
GLH-1	P1	8	51.006	0.925
GLH-1	P1	8	51.514	0.916
GLH-1	P1	8	52.006	0.954
GLH-1	P1	8	52.514	0.95
GLH-1	P1	8	53.005	0.928
GLH-1	P1	8	53.513	0.94
GLH-1	P1	8	54.005	0.953
GLH-1	P1	8	54.513	0.938
GLH-1	P1	8	55.004	0.956
GLH-1	P1	8	55.506	0.947
GLH-1	P1	8	56.005	0.966
GLH-1	P1	8	56.507	0.937
GLH-1	P1	8	57.006	0.964
GLH-1	P1	9	-1	1
GLH-1	P1	9	0	0.217
GLH-1	P1	9	0.506	0.264
GLH-1	P1	9	1.014	0.29
GLH-1	P1	9	1.506	0.303
GLH-1	P1	9	2.005	0.332
GLH-1	P1	9	2.505	0.351
GLH-1	P1	9	3.013	0.368
GLH-1	P1	9	3.504	0.396
GLH-1	P1	9	4.012	0.403
GLH-1	P1	9	4.504	0.417
GLH-1	P1	9	5.012	0.439
GLH-1	P1	9	5.506	0.458
GLH-1	P1	9	6.014	0.475
GLH-1	P1	9	6.505	0.476
GLH-1	P1	9	7.013	0.471
GLH-1	P1	9	7.505	0.454
GLH-1	P1	9	8.013	0.46
GLH-1	P1	9	8.504	0.459
GLH-1	P1	9	9.006	0.469
GLH-1	P1	9	9.505	0.494
GLH-1	P1	9	10.007	0.52
GLH-1	P1	9	10.504	0.535
GLH-1	P1	9	11.012	0.554
GLH-1	P1	9	11.504	0.572
GLH-1	P1	9	12.012	0.594
GLH-1	P1	9	12.506	0.596
GLH-1	P1	9	13.014	0.616
GLH-1	P1	9	13.505	0.63
GLH-1	P1	9	14.013	0.631
GLH-1	P1	9	14.505	0.637
GLH-1	P1	9	15.013	0.647
GLH-1	P1	9	15.504	0.635
GLH-1	P1	9	16.012	0.666
GLH-1	P1	9	16.504	0.679
GLH-1	P1	9	17.006	0.692
GLH-1	P1	9	17.505	0.699
GLH-1	P1	9	18.007	0.7
GLH-1	P1	9	18.504	0.706
GLH-1	P1	9	19.012	0.717
GLH-1	P1	9	19.506	0.719
GLH-1	P1	9	20.005	0.732
GLH-1	P1	9	20.505	0.742
GLH-1	P1	9	21.013	0.746
GLH-1	P1	9	21.504	0.743
GLH-1	P1	9	22.012	0.763
GLH-1	P1	9	22.504	0.759
GLH-1	P1	9	23.012	0.752
GLH-1	P1	9	23.506	0.767
GLH-1	P1	9	24.014	0.782
GLH-1	P1	9	24.505	0.762
GLH-1	P1	9	25.013	0.781
GLH-1	P1	9	25.505	0.805
GLH-1	P1	9	26.007	0.816
GLH-1	P1	9	26.506	0.82
GLH-1	P1	9	27.005	0.818
GLH-1	P1	9	27.505	0.806
GLH-1	P1	9	28.013	0.833
GLH-1	P1	9	28.504	0.837
GLH-1	P1	9	29.012	0.83
GLH-1	P1	9	29.504	0.826
GLH-1	P1	9	30.012	0.813
GLH-1	P1	9	30.506	0.824
GLH-1	P1	9	31.014	0.838
GLH-1	P1	9	31.505	0.812
GLH-1	P1	9	32.013	0.83
GLH-1	P1	9	32.505	0.846
GLH-1	P1	9	33.013	0.855
GLH-1	P1	9	33.504	0.867
GLH-1	P1	9	34.006	0.847
GLH-1	P1	9	34.505	0.862
GLH-1	P1	9	35.007	0.864
GLH-1	P1	9	35.506	0.87
GLH-1	P1	9	36.006	0.889
GLH-1	P1	9	36.505	0.877
GLH-1	P1	9	37.013	0.888
GLH-1	P1	9	37.505	0.884
GLH-1	P1	9	38.013	0.909
GLH-1	P1	9	38.504	0.926
GLH-1	P1	9	39.012	0.91
GLH-1	P1	9	39.506	0.898
GLH-1	P1	9	40.014	0.899
GLH-1	P1	9	40.506	0.897
GLH-1	P1	9	41.014	0.894
GLH-1	P1	9	41.505	0.906
GLH-1	P1	9	42.013	0.904
GLH-1	P1	9	42.505	0.884
GLH-1	P1	9	43.007	0.894
GLH-1	P1	9	43.506	0.933
GLH-1	P1	9	44.005	0.929
GLH-1	P1	9	44.505	0.937
GLH-1	P1	9	45.013	0.919
GLH-1	P1	9	45.504	0.938
GLH-1	P1	9	46.012	0.941
GLH-1	P1	9	46.506	0.946
GLH-1	P1	9	47.014	0.918
GLH-1	P1	9	47.506	0.904
GLH-1	P1	9	48.014	0.901
GLH-1	P1	9	48.505	0.911
GLH-1	P1	9	49.013	0.899
GLH-1	P1	9	49.505	0.893
GLH-1	P1	9	50.013	0.915
GLH-1	P1	9	50.504	0.909
GLH-1	P1	9	51.006	0.953
GLH-1	P1	9	51.506	0.94
GLH-1	P1	9	52.005	0.955
GLH-1	P1	9	52.505	0.963
GLH-1	P1	9	53.013	0.926
GLH-1	P1	9	53.504	0.936
GLH-1	P1	9	54.012	0.965
GLH-1	P1	9	54.504	0.971
GLH-1	P1	9	55.012	0.99
GLH-1	P1	9	55.506	1.005
GLH-1	P1	9	56.014	1.002
GLH-1	P1	9	56.505	1.006
GLH-1	P1	9	57.013	1.021
GLH-1	P1	10	-1	1
GLH-1	P1	10	0	0.072
GLH-1	P1	10	0.506	0.129
GLH-1	P1	10	1.005	0.156
GLH-1	P1	10	1.506	0.185
GLH-1	P1	10	2.005	0.219
GLH-1	P1	10	2.513	0.233
GLH-1	P1	10	3.005	0.256
GLH-1	P1	10	3.513	0.299
GLH-1	P1	10	4.004	0.318
GLH-1	P1	10	4.512	0.317
GLH-1	P1	10	5.006	0.346
GLH-1	P1	10	5.514	0.366
GLH-1	P1	10	6.006	0.379
GLH-1	P1	10	6.514	0.373
GLH-1	P1	10	7.005	0.402
GLH-1	P1	10	7.507	0.402
GLH-1	P1	10	8.006	0.443
GLH-1	P1	10	8.506	0.438
GLH-1	P1	10	9.005	0.445
GLH-1	P1	10	9.513	0.455
GLH-1	P1	10	10.005	0.484
GLH-1	P1	10	10.513	0.499
GLH-1	P1	10	11.004	0.517
GLH-1	P1	10	11.512	0.53
GLH-1	P1	10	12.006	0.548
GLH-1	P1	10	12.514	0.547
GLH-1	P1	10	13.006	0.567
GLH-1	P1	10	13.514	0.586
GLH-1	P1	10	14.005	0.577
GLH-1	P1	10	14.513	0.609
GLH-1	P1	10	15.005	0.591
GLH-1	P1	10	15.507	0.609
GLH-1	P1	10	16.006	0.647
GLH-1	P1	10	16.505	0.651
GLH-1	P1	10	17.005	0.666
GLH-1	P1	10	17.513	0.705
GLH-1	P1	10	18.004	0.688
GLH-1	P1	10	18.512	0.675
GLH-1	P1	10	19.006	0.697
GLH-1	P1	10	19.514	0.686
GLH-1	P1	10	20.006	0.702
GLH-1	P1	10	20.514	0.72
GLH-1	P1	10	21.005	0.732
GLH-1	P1	10	21.513	0.758
GLH-1	P1	10	22.005	0.742
GLH-1	P1	10	22.513	0.727
GLH-1	P1	10	23.004	0.771
GLH-1	P1	10	23.506	0.762
GLH-1	P1	10	24.006	0.796
GLH-1	P1	10	24.505	0.82
GLH-1	P1	10	25.005	0.786
GLH-1	P1	10	25.513	0.796
GLH-1	P1	10	26.004	0.814
GLH-1	P1	10	26.512	0.847
GLH-1	P1	10	27.004	0.842
GLH-1	P1	10	27.512	0.834
GLH-1	P1	10	28.006	0.839
GLH-1	P1	10	28.514	0.827
GLH-1	P1	10	29.005	0.877
GLH-1	P1	10	29.513	0.864
GLH-1	P1	10	30.005	0.886
GLH-1	P1	10	30.513	0.883
GLH-1	P1	10	31.004	0.877
GLH-1	P1	10	31.506	0.897
GLH-1	P1	10	32.005	0.937
GLH-1	P1	10	32.507	0.926
GLH-1	P1	10	33.006	0.976
GLH-1	P1	10	33.506	0.944
GLH-1	P1	10	34.005	0.929
GLH-1	P1	10	34.513	0.949
GLH-1	P1	10	35.005	0.916
GLH-1	P1	10	35.513	0.934
GLH-1	P1	10	36.004	0.897
GLH-1	P1	10	36.512	0.932
GLH-1	P1	10	37.006	0.93
GLH-1	P1	10	37.514	0.938
GLH-1	P1	10	38.006	0.93
GLH-1	P1	10	38.514	0.914
GLH-1	P1	10	39.005	0.911
GLH-1	P1	10	39.513	0.95
GLH-1	P1	10	40.005	0.946
GLH-1	P1	10	40.507	0.875
GLH-1	P1	10	41.006	0.942
GLH-1	P1	10	41.505	0.967
GLH-1	P1	10	42.005	0.979
GLH-1	P1	10	42.513	0.979
GLH-1	P1	10	43.004	0.963
GLH-1	P1	10	43.512	0.958
GLH-1	P1	10	44.006	0.94
GLH-1	P1	10	44.514	0.959
GLH-1	P1	10	45.006	0.936
GLH-1	P1	10	45.514	0.985
GLH-1	P1	10	46.005	0.911
GLH-1	P1	10	46.513	0.948
GLH-1	P1	10	47.005	0.989
GLH-1	P1	10	47.513	0.954
GLH-1	P1	10	48.004	1.001
GLH-1	P1	10	48.506	1.033
GLH-1	P1	10	49.005	1.021
GLH-1	P1	10	49.507	0.998
GLH-1	P1	10	50.006	0.964
GLH-1	P1	10	50.506	0.976
GLH-1	P1	10	51.005	0.93
GLH-1	P1	10	51.513	0.927
GLH-1	P1	10	52.005	0.98
GLH-1	P1	10	52.513	0.979
GLH-1	P1	10	53.004	0.975
GLH-1	P1	10	53.512	0.932
GLH-1	P1	10	54.006	0.885
GLH-1	P1	10	54.514	0.944
GLH-1	P1	10	55.006	0.916
GLH-1	P1	10	55.514	0.912
GLH-1	P1	10	56.005	0.926
GLH-1	P1	10	56.513	0.921
GLH-1	P1	10	57.005	0.953
GLH-1	P3	1	-1	1
GLH-1	P3	1	0	0.215
GLH-1	P3	1	0.501	0.253
GLH-1	P3	1	1.002	0.292
GLH-1	P3	1	1.501	0.313
GLH-1	P3	1	2.002	0.342
GLH-1	P3	1	2.502	0.361
GLH-1	P3	1	3.002	0.383
GLH-1	P3	1	3.502	0.401
GLH-1	P3	1	4.002	0.425
GLH-1	P3	1	4.502	0.44
GLH-1	P3	1	5.002	0.435
GLH-1	P3	1	5.502	0.452
GLH-1	P3	1	6.002	0.461
GLH-1	P3	1	6.502	0.469
GLH-1	P3	1	7.002	0.489
GLH-1	P3	1	7.502	0.49
GLH-1	P3	1	8.003	0.5
GLH-1	P3	1	8.501	0.501
GLH-1	P3	1	9.002	0.505
GLH-1	P3	1	9.501	0.52
GLH-1	P3	1	10.002	0.522
GLH-1	P3	1	10.501	0.529
GLH-1	P3	1	11.003	0.534
GLH-1	P3	1	11.501	0.547
GLH-1	P3	1	12.002	0.56
GLH-1	P3	1	12.501	0.542
GLH-1	P3	1	13.002	0.556
GLH-1	P3	1	13.502	0.558
GLH-1	P3	1	14.002	0.579
GLH-1	P3	1	14.502	0.597
GLH-1	P3	1	15.002	0.599
GLH-1	P3	1	15.502	0.619
GLH-1	P3	1	16.002	0.618
GLH-1	P3	1	16.501	0.646
GLH-1	P3	1	17.002	0.645
GLH-1	P3	1	17.502	0.667
GLH-1	P3	1	18.002	0.681
GLH-1	P3	1	18.502	0.671
GLH-1	P3	1	19.002	0.688
GLH-1	P3	1	19.501	0.697
GLH-1	P3	1	20.002	0.711
GLH-1	P3	1	20.502	0.717
GLH-1	P3	1	21.002	0.725
GLH-1	P3	1	21.502	0.745
GLH-1	P3	1	22.002	0.743
GLH-1	P3	1	22.502	0.751
GLH-1	P3	1	23.002	0.744
GLH-1	P3	1	23.502	0.735
GLH-1	P3	1	24.002	0.76
GLH-1	P3	1	24.501	0.762
GLH-1	P3	1	25.002	0.764
GLH-1	P3	1	25.501	0.777
GLH-1	P3	1	26.002	0.779
GLH-1	P3	1	26.502	0.776
GLH-1	P3	1	27.002	0.777
GLH-1	P3	1	27.502	0.789
GLH-1	P3	1	28.002	0.786
GLH-1	P3	1	28.501	0.793
GLH-1	P3	1	29.002	0.779
GLH-1	P3	1	29.501	0.795
GLH-1	P3	1	30.002	0.8
GLH-1	P3	1	30.501	0.797
GLH-1	P3	1	31.002	0.793
GLH-1	P3	1	31.501	0.798
GLH-1	P3	1	32.002	0.823
GLH-1	P3	1	32.501	0.813
GLH-1	P3	1	33.002	0.81
GLH-1	P3	1	33.501	0.808
GLH-1	P3	1	34.002	0.823
GLH-1	P3	1	34.502	0.83
GLH-1	P3	1	35.002	0.828
GLH-1	P3	1	35.502	0.831
GLH-1	P3	1	36.002	0.849
GLH-1	P3	1	36.501	0.849
GLH-1	P3	1	37.002	0.851
GLH-1	P3	1	37.502	0.86
GLH-1	P3	1	38.002	0.871
GLH-1	P3	1	38.501	0.854
GLH-1	P3	1	39.002	0.864
GLH-1	P3	1	39.501	0.859
GLH-1	P3	1	40.002	0.866
GLH-1	P3	1	40.502	0.875
GLH-1	P3	1	41.002	0.882
GLH-1	P3	1	41.501	0.898
GLH-1	P3	1	42.002	0.911
GLH-1	P3	1	42.501	0.924
GLH-1	P3	1	43.002	0.938
GLH-1	P3	1	43.501	0.94
GLH-1	P3	1	44.002	0.943
GLH-1	P3	1	44.501	0.97
GLH-1	P3	1	45.002	0.965
GLH-1	P3	1	45.502	0.965
GLH-1	P3	1	46.002	0.963
GLH-1	P3	1	46.502	0.964
GLH-1	P3	1	47.002	0.966
GLH-1	P3	1	47.501	0.961
GLH-1	P3	1	48.002	0.968
GLH-1	P3	1	48.501	0.968
GLH-1	P3	1	49.002	0.99
GLH-1	P3	1	49.502	0.987
GLH-1	P3	1	50.002	0.975
GLH-1	P3	1	50.502	0.97
GLH-1	P3	1	51.002	0.978
GLH-1	P3	1	51.502	0.973
GLH-1	P3	1	52.002	0.969
GLH-1	P3	1	52.502	0.964
GLH-1	P3	1	53.002	0.962
GLH-1	P3	1	53.502	0.972
GLH-1	P3	1	54.002	0.991
GLH-1	P3	1	54.502	0.985
GLH-1	P3	1	55.002	0.998
GLH-1	P3	1	55.501	0.99
GLH-1	P3	1	56.002	0.986
GLH-1	P3	1	56.501	0.99
GLH-1	P3	1	57.002	0.988
GLH-1	P3	2	-1	1
GLH-1	P3	2	0	0.092
GLH-1	P3	2	0.501	0.124
GLH-1	P3	2	1.001	0.145
GLH-1	P3	2	1.502	0.168
GLH-1	P3	2	2.001	0.184
GLH-1	P3	2	2.502	0.206
GLH-1	P3	2	3.001	0.228
GLH-1	P3	2	3.501	0.237
GLH-1	P3	2	4.001	0.257
GLH-1	P3	2	4.502	0.275
GLH-1	P3	2	5.001	0.283
GLH-1	P3	2	5.501	0.29
GLH-1	P3	2	6.001	0.299
GLH-1	P3	2	6.502	0.321
GLH-1	P3	2	7.001	0.312
GLH-1	P3	2	7.502	0.328
GLH-1	P3	2	8.002	0.334
GLH-1	P3	2	8.501	0.341
GLH-1	P3	2	9.001	0.357
GLH-1	P3	2	9.502	0.371
GLH-1	P3	2	10.001	0.375
GLH-1	P3	2	10.502	0.392
GLH-1	P3	2	11.001	0.391
GLH-1	P3	2	11.501	0.408
GLH-1	P3	2	12.001	0.413
GLH-1	P3	2	12.502	0.421
GLH-1	P3	2	13.002	0.451
GLH-1	P3	2	13.501	0.466
GLH-1	P3	2	14.001	0.49
GLH-1	P3	2	14.502	0.485
GLH-1	P3	2	15.001	0.498
GLH-1	P3	2	15.502	0.519
GLH-1	P3	2	16.001	0.505
GLH-1	P3	2	16.501	0.545
GLH-1	P3	2	17.001	0.567
GLH-1	P3	2	17.502	0.566
GLH-1	P3	2	18.002	0.596
GLH-1	P3	2	18.501	0.588
GLH-1	P3	2	19.001	0.599
GLH-1	P3	2	19.502	0.612
GLH-1	P3	2	20.001	0.62
GLH-1	P3	2	20.502	0.648
GLH-1	P3	2	21.001	0.669
GLH-1	P3	2	21.501	0.672
GLH-1	P3	2	22.001	0.669
GLH-1	P3	2	22.502	0.701
GLH-1	P3	2	23.002	0.7
GLH-1	P3	2	23.501	0.709
GLH-1	P3	2	24.001	0.716
GLH-1	P3	2	24.502	0.717
GLH-1	P3	2	25.001	0.722
GLH-1	P3	2	25.502	0.727
GLH-1	P3	2	26.001	0.737
GLH-1	P3	2	26.501	0.745
GLH-1	P3	2	27.001	0.762
GLH-1	P3	2	27.502	0.761
GLH-1	P3	2	28.001	0.75
GLH-1	P3	2	28.501	0.762
GLH-1	P3	2	29.001	0.772
GLH-1	P3	2	29.502	0.763
GLH-1	P3	2	30.001	0.78
GLH-1	P3	2	30.502	0.772
GLH-1	P3	2	31.001	0.796
GLH-1	P3	2	31.501	0.787
GLH-1	P3	2	32.001	0.8
GLH-1	P3	2	32.502	0.821
GLH-1	P3	2	33.001	0.794
GLH-1	P3	2	33.501	0.804
GLH-1	P3	2	34.001	0.811
GLH-1	P3	2	34.502	0.822
GLH-1	P3	2	35.001	0.803
GLH-1	P3	2	35.502	0.801
GLH-1	P3	2	36.001	0.829
GLH-1	P3	2	36.501	0.825
GLH-1	P3	2	37.001	0.838
GLH-1	P3	2	37.502	0.833
GLH-1	P3	2	38.001	0.835
GLH-1	P3	2	38.501	0.835
GLH-1	P3	2	39.001	0.853
GLH-1	P3	2	39.502	0.841
GLH-1	P3	2	40.001	0.847
GLH-1	P3	2	40.502	0.845
GLH-1	P3	2	41.002	0.861
GLH-1	P3	2	41.501	0.873
GLH-1	P3	2	42.001	0.905
GLH-1	P3	2	42.502	0.898
GLH-1	P3	2	43.001	0.893
GLH-1	P3	2	43.502	0.876
GLH-1	P3	2	44.001	0.87
GLH-1	P3	2	44.501	0.863
GLH-1	P3	2	45.001	0.886
GLH-1	P3	2	45.502	0.907
GLH-1	P3	2	46.002	0.899
GLH-1	P3	2	46.501	0.897
GLH-1	P3	2	47.001	0.891
GLH-1	P3	2	47.502	0.896
GLH-1	P3	2	48.001	0.909
GLH-1	P3	2	48.502	0.918
GLH-1	P3	2	49.001	0.906
GLH-1	P3	2	49.501	0.916
GLH-1	P3	2	50.001	0.921
GLH-1	P3	2	50.502	0.889
GLH-1	P3	2	51.002	0.919
GLH-1	P3	2	51.501	0.934
GLH-1	P3	2	52.001	0.95
GLH-1	P3	2	52.502	0.929
GLH-1	P3	2	53.001	0.97
GLH-1	P3	2	53.502	0.973
GLH-1	P3	2	54.001	0.965
GLH-1	P3	2	54.501	0.98
GLH-1	P3	2	55.001	0.978
GLH-1	P3	2	55.502	0.977
GLH-1	P3	2	56.002	1.008
GLH-1	P3	2	56.501	0.99
GLH-1	P3	2	57.001	1.003
GLH-1	P3	3	-1	1
GLH-1	P3	3	0	0.028
GLH-1	P3	3	0.501	0.057
GLH-1	P3	3	1.001	0.077
GLH-1	P3	3	1.501	0.1
GLH-1	P3	3	2.002	0.114
GLH-1	P3	3	2.501	0.125
GLH-1	P3	3	3.001	0.141
GLH-1	P3	3	3.501	0.157
GLH-1	P3	3	4.002	0.172
GLH-1	P3	3	4.501	0.178
GLH-1	P3	3	5.002	0.194
GLH-1	P3	3	5.501	0.204
GLH-1	P3	3	6.001	0.214
GLH-1	P3	3	6.501	0.234
GLH-1	P3	3	7.002	0.249
GLH-1	P3	3	7.501	0.266
GLH-1	P3	3	8.002	0.275
GLH-1	P3	3	8.501	0.304
GLH-1	P3	3	9.002	0.304
GLH-1	P3	3	9.501	0.323
GLH-1	P3	3	10.002	0.335
GLH-1	P3	3	10.502	0.341
GLH-1	P3	3	11.001	0.359
GLH-1	P3	3	11.501	0.371
GLH-1	P3	3	12.002	0.39
GLH-1	P3	3	12.501	0.396
GLH-1	P3	3	13.002	0.406
GLH-1	P3	3	13.501	0.421
GLH-1	P3	3	14.001	0.418
GLH-1	P3	3	14.501	0.435
GLH-1	P3	3	15.002	0.428
GLH-1	P3	3	15.502	0.462
GLH-1	P3	3	16.001	0.462
GLH-1	P3	3	16.501	0.477
GLH-1	P3	3	17.002	0.478
GLH-1	P3	3	17.501	0.482
GLH-1	P3	3	18.002	0.505
GLH-1	P3	3	18.501	0.503
GLH-1	P3	3	19.001	0.517
GLH-1	P3	3	19.501	0.536
GLH-1	P3	3	20.002	0.533
GLH-1	P3	3	20.502	0.557
GLH-1	P3	3	21.001	0.575
GLH-1	P3	3	21.501	0.589
GLH-1	P3	3	22.002	0.601
GLH-1	P3	3	22.501	0.611
GLH-1	P3	3	23.002	0.631
GLH-1	P3	3	23.501	0.628
GLH-1	P3	3	24.001	0.636
GLH-1	P3	3	24.501	0.642
GLH-1	P3	3	25.002	0.64
GLH-1	P3	3	25.502	0.649
GLH-1	P3	3	26.001	0.664
GLH-1	P3	3	26.501	0.684
GLH-1	P3	3	27.002	0.718
GLH-1	P3	3	27.501	0.706
GLH-1	P3	3	28.002	0.719
GLH-1	P3	3	28.501	0.729
GLH-1	P3	3	29.001	0.73
GLH-1	P3	3	29.501	0.755
GLH-1	P3	3	30.002	0.752
GLH-1	P3	3	30.501	0.754
GLH-1	P3	3	31.001	0.759
GLH-1	P3	3	31.501	0.764
GLH-1	P3	3	32.002	0.764
GLH-1	P3	3	32.501	0.769
GLH-1	P3	3	33.002	0.771
GLH-1	P3	3	33.501	0.786
GLH-1	P3	3	34.001	0.8
GLH-1	P3	3	34.501	0.821
GLH-1	P3	3	35.002	0.82
GLH-1	P3	3	35.501	0.829
GLH-1	P3	3	36.001	0.816
GLH-1	P3	3	36.501	0.8
GLH-1	P3	3	37.002	0.844
GLH-1	P3	3	37.501	0.855
GLH-1	P3	3	38.002	0.847
GLH-1	P3	3	38.501	0.856
GLH-1	P3	3	39.001	0.844
GLH-1	P3	3	39.501	0.858
GLH-1	P3	3	40.002	0.839
GLH-1	P3	3	40.501	0.861
GLH-1	P3	3	41.002	0.878
GLH-1	P3	3	41.501	0.881
GLH-1	P3	3	42.002	0.86
GLH-1	P3	3	42.501	0.886
GLH-1	P3	3	43.002	0.887
GLH-1	P3	3	43.502	0.917
GLH-1	P3	3	44.001	0.909
GLH-1	P3	3	44.501	0.919
GLH-1	P3	3	45.002	0.915
GLH-1	P3	3	45.501	0.911
GLH-1	P3	3	46.002	0.915
GLH-1	P3	3	46.501	0.918
GLH-1	P3	3	47.001	0.911
GLH-1	P3	3	47.501	0.918
GLH-1	P3	3	48.002	0.918
GLH-1	P3	3	48.502	0.944
GLH-1	P3	3	49.001	0.928
GLH-1	P3	3	49.501	0.918
GLH-1	P3	3	50.002	0.915
GLH-1	P3	3	50.501	0.891
GLH-1	P3	3	51.002	0.898
GLH-1	P3	3	51.501	0.915
GLH-1	P3	3	52.001	0.909
GLH-1	P3	3	52.501	0.899
GLH-1	P3	3	53.002	0.913
GLH-1	P3	3	53.502	0.91
GLH-1	P3	3	54.001	0.905
GLH-1	P3	3	54.501	0.912
GLH-1	P3	3	55.002	0.92
GLH-1	P3	3	55.501	0.921
GLH-1	P3	3	56.002	0.924
GLH-1	P3	3	56.501	0.94
GLH-1	P3	3	57.001	0.911
GLH-1	P3	4	-1	1
GLH-1	P3	4	0	0.073
GLH-1	P3	4	0.501	0.116
GLH-1	P3	4	1.001	0.141
GLH-1	P3	4	1.501	0.157
GLH-1	P3	4	2.002	0.167
GLH-1	P3	4	2.501	0.187
GLH-1	P3	4	3.001	0.202
GLH-1	P3	4	3.501	0.221
GLH-1	P3	4	4.002	0.246
GLH-1	P3	4	4.501	0.243
GLH-1	P3	4	5.002	0.264
GLH-1	P3	4	5.501	0.279
GLH-1	P3	4	6.001	0.313
GLH-1	P3	4	6.501	0.328
GLH-1	P3	4	7.002	0.337
GLH-1	P3	4	7.501	0.334
GLH-1	P3	4	8.002	0.35
GLH-1	P3	4	8.501	0.361
GLH-1	P3	4	9.002	0.39
GLH-1	P3	4	9.501	0.401
GLH-1	P3	4	10.002	0.416
GLH-1	P3	4	10.502	0.414
GLH-1	P3	4	11.001	0.428
GLH-1	P3	4	11.501	0.464
GLH-1	P3	4	12.002	0.434
GLH-1	P3	4	12.501	0.469
GLH-1	P3	4	13.002	0.48
GLH-1	P3	4	13.501	0.493
GLH-1	P3	4	14.001	0.508
GLH-1	P3	4	14.501	0.498
GLH-1	P3	4	15.002	0.534
GLH-1	P3	4	15.502	0.54
GLH-1	P3	4	16.001	0.535
GLH-1	P3	4	16.501	0.559
GLH-1	P3	4	17.002	0.565
GLH-1	P3	4	17.501	0.566
GLH-1	P3	4	18.002	0.57
GLH-1	P3	4	18.501	0.59
GLH-1	P3	4	19.001	0.591
GLH-1	P3	4	19.501	0.611
GLH-1	P3	4	20.002	0.621
GLH-1	P3	4	20.502	0.625
GLH-1	P3	4	21.001	0.64
GLH-1	P3	4	21.501	0.62
GLH-1	P3	4	22.002	0.633
GLH-1	P3	4	22.501	0.639
GLH-1	P3	4	23.002	0.648
GLH-1	P3	4	23.501	0.667
GLH-1	P3	4	24.001	0.697
GLH-1	P3	4	24.501	0.669
GLH-1	P3	4	25.002	0.675
GLH-1	P3	4	25.502	0.695
GLH-1	P3	4	26.001	0.696
GLH-1	P3	4	26.501	0.729
GLH-1	P3	4	27.002	0.707
GLH-1	P3	4	27.501	0.754
GLH-1	P3	4	28.002	0.717
GLH-1	P3	4	28.501	0.726
GLH-1	P3	4	29.001	0.757
GLH-1	P3	4	29.501	0.748
GLH-1	P3	4	30.002	0.744
GLH-1	P3	4	30.501	0.768
GLH-1	P3	4	31.001	0.776
GLH-1	P3	4	31.501	0.76
GLH-1	P3	4	32.002	0.764
GLH-1	P3	4	32.501	0.771
GLH-1	P3	4	33.002	0.781
GLH-1	P3	4	33.501	0.794
GLH-1	P3	4	34.001	0.774
GLH-1	P3	4	34.501	0.802
GLH-1	P3	4	35.002	0.818
GLH-1	P3	4	35.501	0.794
GLH-1	P3	4	36.001	0.823
GLH-1	P3	4	36.501	0.808
GLH-1	P3	4	37.002	0.834
GLH-1	P3	4	37.501	0.849
GLH-1	P3	4	38.002	0.851
GLH-1	P3	4	38.501	0.822
GLH-1	P3	4	39.001	0.848
GLH-1	P3	4	39.501	0.83
GLH-1	P3	4	40.002	0.853
GLH-1	P3	4	40.501	0.819
GLH-1	P3	4	41.002	0.834
GLH-1	P3	4	41.501	0.838
GLH-1	P3	4	42.002	0.839
GLH-1	P3	4	42.501	0.872
GLH-1	P3	4	43.002	0.824
GLH-1	P3	4	43.502	0.883
GLH-1	P3	4	44.001	0.857
GLH-1	P3	4	44.501	0.866
GLH-1	P3	4	45.002	0.825
GLH-1	P3	4	45.501	0.855
GLH-1	P3	4	46.002	0.857
GLH-1	P3	4	46.501	0.834
GLH-1	P3	4	47.001	0.862
GLH-1	P3	4	47.501	0.885
GLH-1	P3	4	48.002	0.838
GLH-1	P3	4	48.502	0.877
GLH-1	P3	4	49.001	0.9
GLH-1	P3	4	49.501	0.89
GLH-1	P3	4	50.002	0.858
GLH-1	P3	4	50.501	0.919
GLH-1	P3	4	51.002	0.905
GLH-1	P3	4	51.501	0.897
GLH-1	P3	4	52.001	0.913
GLH-1	P3	4	52.501	0.952
GLH-1	P3	4	53.002	0.972
GLH-1	P3	4	53.502	0.943
GLH-1	P3	4	54.001	0.949
GLH-1	P3	4	54.501	0.971
GLH-1	P3	4	55.002	0.936
GLH-1	P3	4	55.501	0.951
GLH-1	P3	4	56.002	0.959
GLH-1	P3	4	56.501	0.998
GLH-1	P3	4	57.001	0.988
GLH-1	P3	5	-1	1
GLH-1	P3	5	0	0.102
GLH-1	P3	5	0.502	0.127
GLH-1	P3	5	1.001	0.139
GLH-1	P3	5	1.502	0.151
GLH-1	P3	5	2.001	0.17
GLH-1	P3	5	2.502	0.185
GLH-1	P3	5	3.001	0.187
GLH-1	P3	5	3.502	0.211
GLH-1	P3	5	4.002	0.217
GLH-1	P3	5	4.502	0.231
GLH-1	P3	5	5.002	0.24
GLH-1	P3	5	5.502	0.243
GLH-1	P3	5	6.002	0.262
GLH-1	P3	5	6.502	0.274
GLH-1	P3	5	7.001	0.272
GLH-1	P3	5	7.502	0.289
GLH-1	P3	5	8.002	0.29
GLH-1	P3	5	8.502	0.32
GLH-1	P3	5	9.002	0.333
GLH-1	P3	5	9.502	0.342
GLH-1	P3	5	10.002	0.352
GLH-1	P3	5	10.502	0.36
GLH-1	P3	5	11.002	0.387
GLH-1	P3	5	11.502	0.414
GLH-1	P3	5	12.002	0.439
GLH-1	P3	5	12.502	0.442
GLH-1	P3	5	13.002	0.451
GLH-1	P3	5	13.502	0.474
GLH-1	P3	5	14.002	0.511
GLH-1	P3	5	14.502	0.533
GLH-1	P3	5	15.002	0.536
GLH-1	P3	5	15.502	0.542
GLH-1	P3	5	16.002	0.554
GLH-1	P3	5	16.502	0.561
GLH-1	P3	5	17.002	0.591
GLH-1	P3	5	17.502	0.573
GLH-1	P3	5	18.002	0.57
GLH-1	P3	5	18.502	0.579
GLH-1	P3	5	19.002	0.574
GLH-1	P3	5	19.502	0.602
GLH-1	P3	5	20.001	0.607
GLH-1	P3	5	20.502	0.623
GLH-1	P3	5	21.001	0.662
GLH-1	P3	5	21.502	0.671
GLH-1	P3	5	22.002	0.654
GLH-1	P3	5	22.502	0.672
GLH-1	P3	5	23.002	0.681
GLH-1	P3	5	23.502	0.682
GLH-1	P3	5	24.002	0.667
GLH-1	P3	5	24.502	0.658
GLH-1	P3	5	25.002	0.667
GLH-1	P3	5	25.502	0.67
GLH-1	P3	5	26.001	0.692
GLH-1	P3	5	26.502	0.712
GLH-1	P3	5	27.001	0.724
GLH-1	P3	5	27.502	0.696
GLH-1	P3	5	28.002	0.721
GLH-1	P3	5	28.502	0.751
GLH-1	P3	5	29.001	0.773
GLH-1	P3	5	29.502	0.767
GLH-1	P3	5	30.001	0.78
GLH-1	P3	5	30.502	0.754
GLH-1	P3	5	31.002	0.763
GLH-1	P3	5	31.502	0.741
GLH-1	P3	5	32.001	0.783
GLH-1	P3	5	32.502	0.767
GLH-1	P3	5	33.001	0.797
GLH-1	P3	5	33.502	0.807
GLH-1	P3	5	34.001	0.817
GLH-1	P3	5	34.502	0.864
GLH-1	P3	5	35.001	0.872
GLH-1	P3	5	35.502	0.833
GLH-1	P3	5	36.002	0.81
GLH-1	P3	5	36.502	0.783
GLH-1	P3	5	37.002	0.791
GLH-1	P3	5	37.502	0.77
GLH-1	P3	5	38.001	0.742
GLH-1	P3	5	38.502	0.738
GLH-1	P3	5	39.001	0.773
GLH-1	P3	5	39.502	0.768
GLH-1	P3	5	40.002	0.839
GLH-1	P3	5	40.502	0.852
GLH-1	P3	5	41.002	0.859
GLH-1	P3	5	41.503	0.87
GLH-1	P3	5	42.002	0.881
GLH-1	P3	5	42.502	0.909
GLH-1	P3	5	43.002	0.916
GLH-1	P3	5	43.503	0.978
GLH-1	P3	5	44.001	0.983
GLH-1	P3	5	44.503	1.01
GLH-1	P3	5	45.001	1.01
GLH-1	P3	5	45.502	0.999
GLH-1	P3	5	46.001	0.982
GLH-1	P3	5	46.502	0.983
GLH-1	P3	5	47.002	0.999
GLH-1	P3	5	47.502	0.982
GLH-1	P3	5	48.002	0.986
GLH-1	P3	5	48.502	0.974
GLH-1	P3	5	49.001	1.001
GLH-1	P3	5	49.502	1.013
GLH-1	P3	5	50.001	0.995
GLH-1	P3	5	50.502	0.957
GLH-1	P3	5	51.002	0.946
GLH-1	P3	5	51.502	0.959
GLH-1	P3	5	52.002	0.93
GLH-1	P3	5	52.502	0.898
GLH-1	P3	5	53.002	0.905
GLH-1	P3	5	53.502	0.869
GLH-1	P3	5	54.002	0.852
GLH-1	P3	5	54.502	0.838
GLH-1	P3	5	55.002	0.841
GLH-1	P3	5	55.502	0.844
GLH-1	P3	5	56.002	0.896
GLH-1	P3	5	56.502	0.915
GLH-1	P3	5	57.001	0.964
GLH-1	P3	6	-1	1
GLH-1	P3	6	0	0.131
GLH-1	P3	6	0.501	0.194
GLH-1	P3	6	1.001	0.221
GLH-1	P3	6	1.502	0.257
GLH-1	P3	6	2.001	0.29
GLH-1	P3	6	2.502	0.319
GLH-1	P3	6	3.001	0.346
GLH-1	P3	6	3.501	0.36
GLH-1	P3	6	4.001	0.372
GLH-1	P3	6	4.502	0.404
GLH-1	P3	6	5.001	0.43
GLH-1	P3	6	5.501	0.439
GLH-1	P3	6	6.001	0.465
GLH-1	P3	6	6.502	0.474
GLH-1	P3	6	7.001	0.478
GLH-1	P3	6	7.502	0.512
GLH-1	P3	6	8.002	0.515
GLH-1	P3	6	8.501	0.545
GLH-1	P3	6	9.001	0.542
GLH-1	P3	6	9.502	0.556
GLH-1	P3	6	10.001	0.578
GLH-1	P3	6	10.502	0.576
GLH-1	P3	6	11.001	0.582
GLH-1	P3	6	11.501	0.588
GLH-1	P3	6	12.001	0.611
GLH-1	P3	6	12.502	0.626
GLH-1	P3	6	13.002	0.634
GLH-1	P3	6	13.501	0.614
GLH-1	P3	6	14.001	0.63
GLH-1	P3	6	14.502	0.641
GLH-1	P3	6	15.001	0.683
GLH-1	P3	6	15.502	0.692
GLH-1	P3	6	16.001	0.714
GLH-1	P3	6	16.501	0.743
GLH-1	P3	6	17.001	0.735
GLH-1	P3	6	17.502	0.741
GLH-1	P3	6	18.002	0.776
GLH-1	P3	6	18.501	0.769
GLH-1	P3	6	19.001	0.768
GLH-1	P3	6	19.502	0.779
GLH-1	P3	6	20.001	0.759
GLH-1	P3	6	20.502	0.768
GLH-1	P3	6	21.001	0.783
GLH-1	P3	6	21.501	0.779
GLH-1	P3	6	22.001	0.793
GLH-1	P3	6	22.502	0.797
GLH-1	P3	6	23.002	0.771
GLH-1	P3	6	23.501	0.82
GLH-1	P3	6	24.001	0.824
GLH-1	P3	6	24.502	0.808
GLH-1	P3	6	25.001	0.815
GLH-1	P3	6	25.502	0.826
GLH-1	P3	6	26.001	0.823
GLH-1	P3	6	26.501	0.81
GLH-1	P3	6	27.001	0.846
GLH-1	P3	6	27.502	0.868
GLH-1	P3	6	28.001	0.845
GLH-1	P3	6	28.501	0.857
GLH-1	P3	6	29.001	0.86
GLH-1	P3	6	29.502	0.848
GLH-1	P3	6	30.001	0.878
GLH-1	P3	6	30.502	0.894
GLH-1	P3	6	31.001	0.899
GLH-1	P3	6	31.501	0.899
GLH-1	P3	6	32.001	0.908
GLH-1	P3	6	32.502	0.908
GLH-1	P3	6	33.001	0.92
GLH-1	P3	6	33.501	0.898
GLH-1	P3	6	34.001	0.914
GLH-1	P3	6	34.502	0.917
GLH-1	P3	6	35.001	0.936
GLH-1	P3	6	35.502	0.946
GLH-1	P3	6	36.001	0.968
GLH-1	P3	6	36.501	0.967
GLH-1	P3	6	37.001	0.951
GLH-1	P3	6	37.502	0.949
GLH-1	P3	6	38.001	0.935
GLH-1	P3	6	38.501	0.984
GLH-1	P3	6	39.001	0.982
GLH-1	P3	6	39.502	0.969
GLH-1	P3	6	40.001	0.939
GLH-1	P3	6	40.502	0.955
GLH-1	P3	6	41.002	0.958
GLH-1	P3	6	41.501	0.955
GLH-1	P3	6	42.001	0.938
GLH-1	P3	6	42.502	0.96
GLH-1	P3	6	43.001	0.955
GLH-1	P3	6	43.502	0.936
GLH-1	P3	6	44.001	0.925
GLH-1	P3	6	44.501	0.903
GLH-1	P3	6	45.001	0.923
GLH-1	P3	6	45.502	0.892
GLH-1	P3	6	46.002	0.899
GLH-1	P3	6	46.501	0.899
GLH-1	P3	6	47.001	0.932
GLH-1	P3	6	47.502	0.941
GLH-1	P3	6	48.001	0.943
GLH-1	P3	6	48.502	0.949
GLH-1	P3	6	49.001	0.971
GLH-1	P3	6	49.501	0.956
GLH-1	P3	6	50.001	0.949
GLH-1	P3	6	50.502	0.938
GLH-1	P3	6	51.002	0.943
GLH-1	P3	6	51.501	0.897
GLH-1	P3	6	52.001	0.891
GLH-1	P3	6	52.502	0.894
GLH-1	P3	6	53.001	0.88
GLH-1	P3	6	53.502	0.887
GLH-1	P3	6	54.001	0.917
GLH-1	P3	6	54.501	0.906
GLH-1	P3	6	55.001	0.942
GLH-1	P3	6	55.502	0.939
GLH-1	P3	6	56.002	0.978
GLH-1	P3	6	56.501	1.015
GLH-1	P3	6	57.001	1.029
GLH-1	P3	7	-1	1
GLH-1	P3	7	0	0.09
GLH-1	P3	7	0.501	0.134
GLH-1	P3	7	1.001	0.158
GLH-1	P3	7	1.502	0.179
GLH-1	P3	7	2.001	0.21
GLH-1	P3	7	2.502	0.215
GLH-1	P3	7	3.001	0.248
GLH-1	P3	7	3.501	0.251
GLH-1	P3	7	4.001	0.264
GLH-1	P3	7	4.502	0.281
GLH-1	P3	7	5.001	0.298
GLH-1	P3	7	5.501	0.309
GLH-1	P3	7	6.001	0.314
GLH-1	P3	7	6.502	0.334
GLH-1	P3	7	7.001	0.347
GLH-1	P3	7	7.502	0.372
GLH-1	P3	7	8.002	0.383
GLH-1	P3	7	8.501	0.402
GLH-1	P3	7	9.001	0.416
GLH-1	P3	7	9.502	0.417
GLH-1	P3	7	10.001	0.432
GLH-1	P3	7	10.502	0.427
GLH-1	P3	7	11.001	0.438
GLH-1	P3	7	11.501	0.463
GLH-1	P3	7	12.001	0.475
GLH-1	P3	7	12.502	0.478
GLH-1	P3	7	13.002	0.479
GLH-1	P3	7	13.501	0.484
GLH-1	P3	7	14.001	0.5
GLH-1	P3	7	14.502	0.517
GLH-1	P3	7	15.001	0.507
GLH-1	P3	7	15.502	0.53
GLH-1	P3	7	16.001	0.536
GLH-1	P3	7	16.501	0.55
GLH-1	P3	7	17.001	0.562
GLH-1	P3	7	17.502	0.561
GLH-1	P3	7	18.002	0.573
GLH-1	P3	7	18.501	0.585
GLH-1	P3	7	19.001	0.591
GLH-1	P3	7	19.502	0.608
GLH-1	P3	7	20.001	0.614
GLH-1	P3	7	20.502	0.615
GLH-1	P3	7	21.001	0.634
GLH-1	P3	7	21.501	0.643
GLH-1	P3	7	22.001	0.637
GLH-1	P3	7	22.502	0.653
GLH-1	P3	7	23.002	0.66
GLH-1	P3	7	23.501	0.65
GLH-1	P3	7	24.001	0.678
GLH-1	P3	7	24.502	0.671
GLH-1	P3	7	25.001	0.688
GLH-1	P3	7	25.502	0.683
GLH-1	P3	7	26.001	0.69
GLH-1	P3	7	26.501	0.701
GLH-1	P3	7	27.001	0.713
GLH-1	P3	7	27.502	0.718
GLH-1	P3	7	28.001	0.714
GLH-1	P3	7	28.501	0.717
GLH-1	P3	7	29.001	0.734
GLH-1	P3	7	29.502	0.746
GLH-1	P3	7	30.001	0.749
GLH-1	P3	7	30.502	0.752
GLH-1	P3	7	31.001	0.782
GLH-1	P3	7	31.501	0.765
GLH-1	P3	7	32.001	0.773
GLH-1	P3	7	32.502	0.771
GLH-1	P3	7	33.001	0.773
GLH-1	P3	7	33.501	0.793
GLH-1	P3	7	34.001	0.772
GLH-1	P3	7	34.502	0.78
GLH-1	P3	7	35.001	0.786
GLH-1	P3	7	35.502	0.809
GLH-1	P3	7	36.001	0.814
GLH-1	P3	7	36.501	0.807
GLH-1	P3	7	37.001	0.833
GLH-1	P3	7	37.502	0.827
GLH-1	P3	7	38.001	0.832
GLH-1	P3	7	38.501	0.842
GLH-1	P3	7	39.001	0.851
GLH-1	P3	7	39.502	0.847
GLH-1	P3	7	40.001	0.852
GLH-1	P3	7	40.502	0.858
GLH-1	P3	7	41.002	0.874
GLH-1	P3	7	41.501	0.863
GLH-1	P3	7	42.001	0.867
GLH-1	P3	7	42.502	0.89
GLH-1	P3	7	43.001	0.899
GLH-1	P3	7	43.502	0.884
GLH-1	P3	7	44.001	0.882
GLH-1	P3	7	44.501	0.888
GLH-1	P3	7	45.001	0.909
GLH-1	P3	7	45.502	0.922
GLH-1	P3	7	46.002	0.907
GLH-1	P3	7	46.501	0.908
GLH-1	P3	7	47.001	0.917
GLH-1	P3	7	47.502	0.911
GLH-1	P3	7	48.001	0.919
GLH-1	P3	7	48.502	0.926
GLH-1	P3	7	49.001	0.919
GLH-1	P3	7	49.501	0.933
GLH-1	P3	7	50.001	0.922
GLH-1	P3	7	50.502	0.944
GLH-1	P3	7	51.002	0.957
GLH-1	P3	7	51.501	0.964
GLH-1	P3	7	52.001	0.932
GLH-1	P3	7	52.502	0.935
GLH-1	P3	7	53.001	0.955
GLH-1	P3	7	53.502	0.938
GLH-1	P3	7	54.001	0.929
GLH-1	P3	7	54.501	0.935
GLH-1	P3	7	55.001	0.94
GLH-1	P3	7	55.502	0.942
GLH-1	P3	7	56.002	0.953
GLH-1	P3	7	56.501	0.966
GLH-1	P3	7	57.001	0.969
GLH-1	P3	8	-1	1
GLH-1	P3	8	0	0.082
GLH-1	P3	8	0.501	0.113
GLH-1	P3	8	1.001	0.144
GLH-1	P3	8	1.502	0.157
GLH-1	P3	8	2.001	0.166
GLH-1	P3	8	2.502	0.18
GLH-1	P3	8	3.001	0.193
GLH-1	P3	8	3.501	0.212
GLH-1	P3	8	4.001	0.232
GLH-1	P3	8	4.502	0.231
GLH-1	P3	8	5.001	0.26
GLH-1	P3	8	5.501	0.27
GLH-1	P3	8	6.001	0.277
GLH-1	P3	8	6.502	0.289
GLH-1	P3	8	7.001	0.294
GLH-1	P3	8	7.502	0.308
GLH-1	P3	8	8.002	0.327
GLH-1	P3	8	8.501	0.346
GLH-1	P3	8	9.001	0.36
GLH-1	P3	8	9.502	0.371
GLH-1	P3	8	10.001	0.389
GLH-1	P3	8	10.502	0.404
GLH-1	P3	8	11.001	0.409
GLH-1	P3	8	11.501	0.428
GLH-1	P3	8	12.001	0.429
[truncated: 12,038 more rows]

## Sheet: Figure_6B.2
Figure 6B.2. Quantification of recovery rates from FRAP of individual P granules in P1 cells of 2-cell and P3 cells of 8- to 12-cell embryos carrying individual GFP-tagged P granule proteins. Units: 1/sec.
Protein	Strain	Replicate	Stage	K1
MEG-3	JH3016	1	2	0.0413
MEG-3	JH3016	2	2	0.0389
MEG-3	JH3016	3	2	0.0341
MEG-3	JH3016	4	2	0.0482
MEG-3	JH3016	5	2	0.0336
MEG-3	JH3016	6	2	0.0308
MEG-3	JH3016	7	2	0.0313
MEG-3	JH3016	8	2	0.0346
MEG-3	JH3016	9	2	0.0339
MEG-3	JH3016	10	2	0.0266
MEG-3	JH3016	1	8	0.0401
MEG-3	JH3016	2	8	0.0529
MEG-3	JH3016	3	8	0.0505
MEG-3	JH3016	4	8	0.0414
MEG-3	JH3016	5	8	0.0432
MEG-3	JH3016	6	8	0.0858
MEG-3	JH3016	7	8	0.0533
MEG-3	JH3016	8	8	0.0657
MEG-3	JH3016	9	8	0.039
MEG-3	JH3016	10	8	0.0426
MIP-1	GKC564	1	2	0.0417
MIP-1	GKC564	2	2	0.0467
MIP-1	GKC564	3	2	0.0427
MIP-1	GKC564	4	2	0.0393
MIP-1	GKC564	5	2	0.0372
MIP-1	GKC564	6	2	0.0304
MIP-1	GKC564	7	2	0.0716
MIP-1	GKC564	8	2	0.0346
MIP-1	GKC564	9	2	0.0371
MIP-1	GKC564	10	2	0.0431
MIP-1	GKC564	1	8	0.0257
MIP-1	GKC564	2	8	0.0327
MIP-1	GKC564	3	8	0.0385
MIP-1	GKC564	4	8	0.0515
MIP-1	GKC564	5	8	0.0401
MIP-1	GKC564	6	8	0.0378
MIP-1	GKC564	7	8	0.034
MIP-1	GKC564	8	8	0.034
MIP-1	GKC564	9	8	0.0359
MIP-1	GKC564	10	8	0.0436
MIP-2	GKC511	1	2	0.0402
MIP-2	GKC511	2	2	0.0702
MIP-2	GKC511	3	2	0.0378
MIP-2	GKC511	4	2	0.0259
MIP-2	GKC511	5	2	0.042
MIP-2	GKC511	6	2	0.0415
MIP-2	GKC511	7	2	0.0395
MIP-2	GKC511	8	2	0.0374
MIP-2	GKC511	9	2	0.045
MIP-2	GKC511	10	2	0.0468
MIP-2	GKC511	1	8	0.0501
MIP-2	GKC511	2	8	0.0401
MIP-2	GKC511	3	8	0.0354
MIP-2	GKC511	4	8	0.0477
MIP-2	GKC511	5	8	0.0378
MIP-2	GKC511	6	8	0.0263
MIP-2	GKC511	7	8	0.0502
MIP-2	GKC511	8	8	0.034
MIP-2	GKC511	9	8	0.0445
MIP-2	GKC511	10	8	0.0503
PGL-3	JH2017	1	2	0.0755
PGL-3	JH2017	2	2	0.2204
PGL-3	JH2017	3	2	0.0421
PGL-3	JH2017	4	2	0.0652
PGL-3	JH2017	5	2	0.065
PGL-3	JH2017	6	2	0.0417
PGL-3	JH2017	7	2	0.295
PGL-3	JH2017	8	2	0.0489
PGL-3	JH2017	9	2	0.061
PGL-3	JH2017	10	2	0.0921
PGL-3	JH2017	1	8	0.0358
PGL-3	JH2017	2	8	0.0135
PGL-3	JH2017	3	8	0.0735
PGL-3	JH2017	4	8	0.0616
PGL-3	JH2017	5	8	0.0556
PGL-3	JH2017	6	8	0.0379
PGL-3	JH2017	7	8	0.0441
PGL-3	JH2017	8	8	0.0484
PGL-3	JH2017	9	8	0.0446
PGL-3	JH2017	10	8	0.0421
MEG-3	JH3503	1	2	0.052
MEG-3	JH3503	2	2	0.05
MEG-3	JH3503	3	2	0.0504
MEG-3	JH3503	4	2	0.0472
MEG-3	JH3503	5	2	0.0466
MEG-3	JH3503	6	2	0.0465
MEG-3	JH3503	7	2	0.0481
MEG-3	JH3503	8	2	0.0469
MEG-3	JH3503	9	2	0.0466
MEG-3	JH3503	10	2	0.0463
MEG-3	JH3503	1	8	0.0456
MEG-3	JH3503	2	8	0.045
MEG-3	JH3503	3	8	0.0497
MEG-3	JH3503	4	8	0.0496
MEG-3	JH3503	5	8	0.0451
MEG-3	JH3503	6	8	0.0482
MEG-3	JH3503	7	8	0.042
MEG-3	JH3503	8	8	0.0438
MEG-3	JH3503	9	8	0.0474
MEG-3	JH3503	10	8	0.0455
GLH-1	DUP64	1	2	0.064
GLH-1	DUP64	2	2	0.0426
GLH-1	DUP64	3	2	0.0417
GLH-1	DUP64	4	2	0.0419
GLH-1	DUP64	5	2	0.0436
GLH-1	DUP64	6	2	0.0402
GLH-1	DUP64	7	2	0.0445
GLH-1	DUP64	8	2	0.0506
GLH-1	DUP64	9	2	0.0642
GLH-1	DUP64	10	2	0.0402
GLH-1	DUP64	1	8	0.0513
GLH-1	DUP64	2	8	0.0478
GLH-1	DUP64	3	8	0.0571
GLH-1	DUP64	4	8	0.0447
GLH-1	DUP64	5	8	0.045
GLH-1	DUP64	6	8	0.0486
GLH-1	DUP64	7	8	0.0441
GLH-1	DUP64	8	8	0.0467
GLH-1	DUP64	9	8	0.0505
GLH-1	DUP64	10	8	0.0481
GLH-1	DUP64	11	8	0.0469
GLH-1	DUP64	12	8	0.0444
