# Supplementary material for: Novel LOTUS-domain proteins are organizational hubs that recruit C. elegans Vasa to germ granules
Source: eLife. 2021 Jul 5;10:e60833. doi: 10.7554/eLife.60833 (PMC8331183; doi:10.7554/eLife.60833)
Supplement: Figure 8—source data 1. [file elife-60833-fig8-data1.xlsx]

## Sheet: Figure_8E.1
Figure 8E.1. FRAP data of GFP::GLH-1 in P3 cells of WT and mip-1(uae1) null embryos (n=10 replicates each). Units for Time: seconds.
Genetic_Background	Replicate	Time	Intensity
mip-1(uae1)	1	-1	1
mip-1(uae1)	1	0	0.098
mip-1(uae1)	1	0.501	0.196
mip-1(uae1)	1	1.001	0.26
mip-1(uae1)	1	1.501	0.315
mip-1(uae1)	1	2.002	0.345
mip-1(uae1)	1	2.501	0.382
mip-1(uae1)	1	3.001	0.412
mip-1(uae1)	1	3.501	0.431
mip-1(uae1)	1	4.002	0.469
mip-1(uae1)	1	4.501	0.49
mip-1(uae1)	1	5.002	0.51
mip-1(uae1)	1	5.501	0.555
mip-1(uae1)	1	6.001	0.561
mip-1(uae1)	1	6.501	0.593
mip-1(uae1)	1	7.002	0.606
mip-1(uae1)	1	7.501	0.649
mip-1(uae1)	1	8.002	0.653
mip-1(uae1)	1	8.501	0.698
mip-1(uae1)	1	9.002	0.689
mip-1(uae1)	1	9.501	0.717
mip-1(uae1)	1	10.002	0.712
mip-1(uae1)	1	10.502	0.713
mip-1(uae1)	1	11.001	0.738
mip-1(uae1)	1	11.501	0.728
mip-1(uae1)	1	12.002	0.705
mip-1(uae1)	1	12.501	0.688
mip-1(uae1)	1	13.002	0.69
mip-1(uae1)	1	13.501	0.687
mip-1(uae1)	1	14.001	0.674
mip-1(uae1)	1	14.501	0.663
mip-1(uae1)	1	15.002	0.671
mip-1(uae1)	1	15.502	0.67
mip-1(uae1)	1	16.001	0.691
mip-1(uae1)	1	16.501	0.713
mip-1(uae1)	1	17.002	0.72
mip-1(uae1)	1	17.501	0.719
mip-1(uae1)	1	18.002	0.73
mip-1(uae1)	1	18.501	0.74
mip-1(uae1)	1	19.001	0.744
mip-1(uae1)	1	19.501	0.752
mip-1(uae1)	1	20.002	0.771
mip-1(uae1)	1	20.502	0.788
mip-1(uae1)	1	21.001	0.806
mip-1(uae1)	1	21.501	0.818
mip-1(uae1)	1	22.002	0.844
mip-1(uae1)	1	22.501	0.859
mip-1(uae1)	1	23.002	0.859
mip-1(uae1)	1	23.501	0.868
mip-1(uae1)	1	24.001	0.901
mip-1(uae1)	1	24.501	0.891
mip-1(uae1)	1	25.002	0.909
mip-1(uae1)	1	25.502	0.914
mip-1(uae1)	1	26.001	0.917
mip-1(uae1)	1	26.501	0.929
mip-1(uae1)	1	27.002	0.935
mip-1(uae1)	1	27.501	0.943
mip-1(uae1)	1	28.002	0.949
mip-1(uae1)	1	28.501	0.94
mip-1(uae1)	1	29.001	0.943
mip-1(uae1)	1	29.501	0.96
mip-1(uae1)	1	30.002	0.951
mip-1(uae1)	1	30.501	0.96
mip-1(uae1)	1	31.001	0.969
mip-1(uae1)	1	31.501	0.968
mip-1(uae1)	1	32.002	0.962
mip-1(uae1)	1	32.501	0.963
mip-1(uae1)	1	33.002	0.976
mip-1(uae1)	1	33.501	0.969
mip-1(uae1)	1	34.001	0.967
mip-1(uae1)	1	34.501	0.956
mip-1(uae1)	1	35.002	0.972
mip-1(uae1)	1	35.501	0.972
mip-1(uae1)	1	36.001	0.972
mip-1(uae1)	1	36.501	0.974
mip-1(uae1)	1	37.002	0.965
mip-1(uae1)	1	37.501	0.964
mip-1(uae1)	1	38.002	0.97
mip-1(uae1)	1	38.501	0.972
mip-1(uae1)	1	39.001	0.986
mip-1(uae1)	1	39.501	0.994
mip-1(uae1)	1	40.002	1.004
mip-1(uae1)	1	40.501	0.993
mip-1(uae1)	1	41.002	1.007
mip-1(uae1)	1	41.501	1.009
mip-1(uae1)	1	42.002	1.016
mip-1(uae1)	1	42.501	1.018
mip-1(uae1)	1	43.002	1.02
mip-1(uae1)	1	43.502	1.015
mip-1(uae1)	1	44.001	1.034
mip-1(uae1)	1	44.501	1.03
mip-1(uae1)	1	45.002	1.037
mip-1(uae1)	1	45.501	1.032
mip-1(uae1)	1	46.002	1.037
mip-1(uae1)	1	46.501	1.044
mip-1(uae1)	1	47.001	1.04
mip-1(uae1)	1	47.501	1.042
mip-1(uae1)	1	48.002	1.037
mip-1(uae1)	1	48.502	1.033
mip-1(uae1)	1	49.001	1.042
mip-1(uae1)	1	49.501	1.049
mip-1(uae1)	1	50.002	1.059
mip-1(uae1)	1	50.501	1.047
mip-1(uae1)	1	51.002	1.035
mip-1(uae1)	1	51.501	1.036
mip-1(uae1)	1	52.001	1.055
mip-1(uae1)	1	52.501	1.052
mip-1(uae1)	1	53.002	1.057
mip-1(uae1)	1	53.502	1.036
mip-1(uae1)	1	54.001	1.016
mip-1(uae1)	1	54.501	1.015
mip-1(uae1)	1	55.002	1.022
mip-1(uae1)	1	55.501	1.011
mip-1(uae1)	1	56.002	1.003
mip-1(uae1)	1	56.501	1.008
mip-1(uae1)	1	57.001	1
WT	1	-1	1
WT	1	0	0.215
WT	1	0.501	0.253
WT	1	1.002	0.292
WT	1	1.501	0.313
WT	1	2.002	0.342
WT	1	2.502	0.361
WT	1	3.002	0.383
WT	1	3.502	0.401
WT	1	4.002	0.425
WT	1	4.502	0.44
WT	1	5.002	0.435
WT	1	5.502	0.452
WT	1	6.002	0.461
WT	1	6.502	0.469
WT	1	7.002	0.489
WT	1	7.502	0.49
WT	1	8.003	0.5
WT	1	8.501	0.501
WT	1	9.002	0.505
WT	1	9.501	0.52
WT	1	10.002	0.522
WT	1	10.501	0.529
WT	1	11.003	0.534
WT	1	11.501	0.547
WT	1	12.002	0.56
WT	1	12.501	0.542
WT	1	13.002	0.556
WT	1	13.502	0.558
WT	1	14.002	0.579
WT	1	14.502	0.597
WT	1	15.002	0.599
WT	1	15.502	0.619
WT	1	16.002	0.618
WT	1	16.501	0.646
WT	1	17.002	0.645
WT	1	17.502	0.667
WT	1	18.002	0.681
WT	1	18.502	0.671
WT	1	19.002	0.688
WT	1	19.501	0.697
WT	1	20.002	0.711
WT	1	20.502	0.717
WT	1	21.002	0.725
WT	1	21.502	0.745
WT	1	22.002	0.743
WT	1	22.502	0.751
WT	1	23.002	0.744
WT	1	23.502	0.735
WT	1	24.002	0.76
WT	1	24.501	0.762
WT	1	25.002	0.764
WT	1	25.501	0.777
WT	1	26.002	0.779
WT	1	26.502	0.776
WT	1	27.002	0.777
WT	1	27.502	0.789
WT	1	28.002	0.786
WT	1	28.501	0.793
WT	1	29.002	0.779
WT	1	29.501	0.795
WT	1	30.002	0.8
WT	1	30.501	0.797
WT	1	31.002	0.793
WT	1	31.501	0.798
WT	1	32.002	0.823
WT	1	32.501	0.813
WT	1	33.002	0.81
WT	1	33.501	0.808
WT	1	34.002	0.823
WT	1	34.502	0.83
WT	1	35.002	0.828
WT	1	35.502	0.831
WT	1	36.002	0.849
WT	1	36.501	0.849
WT	1	37.002	0.851
WT	1	37.502	0.86
WT	1	38.002	0.871
WT	1	38.501	0.854
WT	1	39.002	0.864
WT	1	39.501	0.859
WT	1	40.002	0.866
WT	1	40.502	0.875
WT	1	41.002	0.882
WT	1	41.501	0.898
WT	1	42.002	0.911
WT	1	42.501	0.924
WT	1	43.002	0.938
WT	1	43.501	0.94
WT	1	44.002	0.943
WT	1	44.501	0.97
WT	1	45.002	0.965
WT	1	45.502	0.965
WT	1	46.002	0.963
WT	1	46.502	0.964
WT	1	47.002	0.966
WT	1	47.501	0.961
WT	1	48.002	0.968
WT	1	48.501	0.968
WT	1	49.002	0.99
WT	1	49.502	0.987
WT	1	50.002	0.975
WT	1	50.502	0.97
WT	1	51.002	0.978
WT	1	51.502	0.973
WT	1	52.002	0.969
WT	1	52.502	0.964
WT	1	53.002	0.962
WT	1	53.502	0.972
WT	1	54.002	0.991
WT	1	54.502	0.985
WT	1	55.002	0.998
WT	1	55.501	0.99
WT	1	56.002	0.986
WT	1	56.501	0.99
WT	1	57.002	0.988
mip-1(uae1)	2	-1	1
mip-1(uae1)	2	0	0.183
mip-1(uae1)	2	0.501	0.326
mip-1(uae1)	2	1.001	0.419
mip-1(uae1)	2	1.502	0.472
mip-1(uae1)	2	2.001	0.521
mip-1(uae1)	2	2.502	0.546
mip-1(uae1)	2	3.001	0.578
mip-1(uae1)	2	3.501	0.593
mip-1(uae1)	2	4.001	0.615
mip-1(uae1)	2	4.502	0.627
mip-1(uae1)	2	5.001	0.652
mip-1(uae1)	2	5.501	0.658
mip-1(uae1)	2	6.001	0.677
mip-1(uae1)	2	6.502	0.698
mip-1(uae1)	2	7.001	0.711
mip-1(uae1)	2	7.502	0.72
mip-1(uae1)	2	8.002	0.73
mip-1(uae1)	2	8.501	0.735
mip-1(uae1)	2	9.001	0.758
mip-1(uae1)	2	9.502	0.77
mip-1(uae1)	2	10.001	0.768
mip-1(uae1)	2	10.502	0.789
mip-1(uae1)	2	11.001	0.812
mip-1(uae1)	2	11.501	0.816
mip-1(uae1)	2	12.001	0.822
mip-1(uae1)	2	12.502	0.829
mip-1(uae1)	2	13.002	0.836
mip-1(uae1)	2	13.501	0.852
mip-1(uae1)	2	14.001	0.847
mip-1(uae1)	2	14.502	0.837
mip-1(uae1)	2	15.001	0.862
mip-1(uae1)	2	15.502	0.866
mip-1(uae1)	2	16.001	0.863
mip-1(uae1)	2	16.501	0.871
mip-1(uae1)	2	17.001	0.895
mip-1(uae1)	2	17.502	0.89
mip-1(uae1)	2	18.002	0.896
mip-1(uae1)	2	18.501	0.911
mip-1(uae1)	2	19.001	0.9
mip-1(uae1)	2	19.502	0.911
mip-1(uae1)	2	20.001	0.904
mip-1(uae1)	2	20.502	0.927
mip-1(uae1)	2	21.001	0.939
mip-1(uae1)	2	21.501	0.941
mip-1(uae1)	2	22.001	0.94
mip-1(uae1)	2	22.502	0.94
mip-1(uae1)	2	23.002	0.958
mip-1(uae1)	2	23.501	0.96
mip-1(uae1)	2	24.001	0.97
mip-1(uae1)	2	24.502	0.96
mip-1(uae1)	2	25.001	0.976
mip-1(uae1)	2	25.502	0.975
mip-1(uae1)	2	26.001	0.969
mip-1(uae1)	2	26.501	0.97
mip-1(uae1)	2	27.001	0.976
mip-1(uae1)	2	27.502	0.972
mip-1(uae1)	2	28.001	0.986
mip-1(uae1)	2	28.501	0.997
mip-1(uae1)	2	29.001	0.986
mip-1(uae1)	2	29.502	1.006
mip-1(uae1)	2	30.001	0.997
mip-1(uae1)	2	30.502	0.995
mip-1(uae1)	2	31.001	0.995
mip-1(uae1)	2	31.501	0.999
mip-1(uae1)	2	32.001	0.996
mip-1(uae1)	2	32.502	1.001
mip-1(uae1)	2	33.001	1.005
mip-1(uae1)	2	33.501	1
mip-1(uae1)	2	34.001	0.998
mip-1(uae1)	2	34.502	0.982
mip-1(uae1)	2	35.001	0.984
mip-1(uae1)	2	35.502	1.005
mip-1(uae1)	2	36.001	1.005
mip-1(uae1)	2	36.501	1.007
mip-1(uae1)	2	37.001	1.015
mip-1(uae1)	2	37.502	1.003
mip-1(uae1)	2	38.001	0.998
mip-1(uae1)	2	38.501	0.988
mip-1(uae1)	2	39.001	0.99
mip-1(uae1)	2	39.502	0.979
mip-1(uae1)	2	40.001	0.976
mip-1(uae1)	2	40.502	0.968
mip-1(uae1)	2	41.002	0.99
mip-1(uae1)	2	41.501	0.974
mip-1(uae1)	2	42.001	0.981
mip-1(uae1)	2	42.502	0.984
mip-1(uae1)	2	43.001	0.991
mip-1(uae1)	2	43.502	0.986
mip-1(uae1)	2	44.001	0.975
mip-1(uae1)	2	44.501	0.989
mip-1(uae1)	2	45.001	0.989
mip-1(uae1)	2	45.502	0.996
mip-1(uae1)	2	46.002	0.992
mip-1(uae1)	2	46.501	1.002
mip-1(uae1)	2	47.001	1.003
mip-1(uae1)	2	47.502	1.007
mip-1(uae1)	2	48.001	0.992
mip-1(uae1)	2	48.502	1.001
mip-1(uae1)	2	49.001	0.993
mip-1(uae1)	2	49.501	0.999
mip-1(uae1)	2	50.001	0.99
mip-1(uae1)	2	50.502	1.005
mip-1(uae1)	2	51.002	0.988
mip-1(uae1)	2	51.501	0.997
mip-1(uae1)	2	52.001	0.992
mip-1(uae1)	2	52.502	1.004
mip-1(uae1)	2	53.001	1.014
mip-1(uae1)	2	53.502	1.006
mip-1(uae1)	2	54.001	1.025
mip-1(uae1)	2	54.501	1.039
mip-1(uae1)	2	55.001	1.039
mip-1(uae1)	2	55.502	1.035
mip-1(uae1)	2	56.002	1.039
mip-1(uae1)	2	56.501	1.025
mip-1(uae1)	2	57.001	1.051
WT	2	-1	1
WT	2	0	0.092
WT	2	0.501	0.124
WT	2	1.001	0.145
WT	2	1.502	0.168
WT	2	2.001	0.184
WT	2	2.502	0.206
WT	2	3.001	0.228
WT	2	3.501	0.237
WT	2	4.001	0.257
WT	2	4.502	0.275
WT	2	5.001	0.283
WT	2	5.501	0.29
WT	2	6.001	0.299
WT	2	6.502	0.321
WT	2	7.001	0.312
WT	2	7.502	0.328
WT	2	8.002	0.334
WT	2	8.501	0.341
WT	2	9.001	0.357
WT	2	9.502	0.371
WT	2	10.001	0.375
WT	2	10.502	0.392
WT	2	11.001	0.391
WT	2	11.501	0.408
WT	2	12.001	0.413
WT	2	12.502	0.421
WT	2	13.002	0.451
WT	2	13.501	0.466
WT	2	14.001	0.49
WT	2	14.502	0.485
WT	2	15.001	0.498
WT	2	15.502	0.519
WT	2	16.001	0.505
WT	2	16.501	0.545
WT	2	17.001	0.567
WT	2	17.502	0.566
WT	2	18.002	0.596
WT	2	18.501	0.588
WT	2	19.001	0.599
WT	2	19.502	0.612
WT	2	20.001	0.62
WT	2	20.502	0.648
WT	2	21.001	0.669
WT	2	21.501	0.672
WT	2	22.001	0.669
WT	2	22.502	0.701
WT	2	23.002	0.7
WT	2	23.501	0.709
WT	2	24.001	0.716
WT	2	24.502	0.717
WT	2	25.001	0.722
WT	2	25.502	0.727
WT	2	26.001	0.737
WT	2	26.501	0.745
WT	2	27.001	0.762
WT	2	27.502	0.761
WT	2	28.001	0.75
WT	2	28.501	0.762
WT	2	29.001	0.772
WT	2	29.502	0.763
WT	2	30.001	0.78
WT	2	30.502	0.772
WT	2	31.001	0.796
WT	2	31.501	0.787
WT	2	32.001	0.8
WT	2	32.502	0.821
WT	2	33.001	0.794
WT	2	33.501	0.804
WT	2	34.001	0.811
WT	2	34.502	0.822
WT	2	35.001	0.803
WT	2	35.502	0.801
WT	2	36.001	0.829
WT	2	36.501	0.825
WT	2	37.001	0.838
WT	2	37.502	0.833
WT	2	38.001	0.835
WT	2	38.501	0.835
WT	2	39.001	0.853
WT	2	39.502	0.841
WT	2	40.001	0.847
WT	2	40.502	0.845
WT	2	41.002	0.861
WT	2	41.501	0.873
WT	2	42.001	0.905
WT	2	42.502	0.898
WT	2	43.001	0.893
WT	2	43.502	0.876
WT	2	44.001	0.87
WT	2	44.501	0.863
WT	2	45.001	0.886
WT	2	45.502	0.907
WT	2	46.002	0.899
WT	2	46.501	0.897
WT	2	47.001	0.891
WT	2	47.502	0.896
WT	2	48.001	0.909
WT	2	48.502	0.918
WT	2	49.001	0.906
WT	2	49.501	0.916
WT	2	50.001	0.921
WT	2	50.502	0.889
WT	2	51.002	0.919
WT	2	51.501	0.934
WT	2	52.001	0.95
WT	2	52.502	0.929
WT	2	53.001	0.97
WT	2	53.502	0.973
WT	2	54.001	0.965
WT	2	54.501	0.98
WT	2	55.001	0.978
WT	2	55.502	0.977
WT	2	56.002	1.008
WT	2	56.501	0.99
WT	2	57.001	1.003
mip-1(uae1)	3	-1	1
mip-1(uae1)	3	0	0.107
mip-1(uae1)	3	0.501	0.25
mip-1(uae1)	3	1.001	0.326
mip-1(uae1)	3	1.502	0.375
mip-1(uae1)	3	2.001	0.402
mip-1(uae1)	3	2.502	0.44
mip-1(uae1)	3	3.001	0.452
mip-1(uae1)	3	3.501	0.486
mip-1(uae1)	3	4.001	0.491
mip-1(uae1)	3	4.502	0.522
mip-1(uae1)	3	5.001	0.539
mip-1(uae1)	3	5.501	0.554
mip-1(uae1)	3	6.001	0.543
mip-1(uae1)	3	6.502	0.57
mip-1(uae1)	3	7.001	0.589
mip-1(uae1)	3	7.502	0.604
mip-1(uae1)	3	8.002	0.607
mip-1(uae1)	3	8.501	0.61
mip-1(uae1)	3	9.001	0.622
mip-1(uae1)	3	9.502	0.645
mip-1(uae1)	3	10.001	0.657
mip-1(uae1)	3	10.502	0.651
mip-1(uae1)	3	11.001	0.695
mip-1(uae1)	3	11.501	0.672
mip-1(uae1)	3	12.001	0.676
mip-1(uae1)	3	12.502	0.715
mip-1(uae1)	3	13.002	0.711
mip-1(uae1)	3	13.501	0.735
mip-1(uae1)	3	14.001	0.758
mip-1(uae1)	3	14.502	0.754
mip-1(uae1)	3	15.001	0.764
mip-1(uae1)	3	15.502	0.765
mip-1(uae1)	3	16.001	0.787
mip-1(uae1)	3	16.501	0.794
mip-1(uae1)	3	17.001	0.811
mip-1(uae1)	3	17.502	0.832
mip-1(uae1)	3	18.002	0.852
mip-1(uae1)	3	18.501	0.857
mip-1(uae1)	3	19.001	0.878
mip-1(uae1)	3	19.502	0.892
mip-1(uae1)	3	20.001	0.888
mip-1(uae1)	3	20.502	0.921
mip-1(uae1)	3	21.001	0.917
mip-1(uae1)	3	21.501	0.942
mip-1(uae1)	3	22.001	0.943
mip-1(uae1)	3	22.502	0.979
mip-1(uae1)	3	23.002	0.942
mip-1(uae1)	3	23.501	0.944
mip-1(uae1)	3	24.001	0.927
mip-1(uae1)	3	24.502	0.922
mip-1(uae1)	3	25.001	0.944
mip-1(uae1)	3	25.502	0.928
mip-1(uae1)	3	26.001	0.979
mip-1(uae1)	3	26.501	0.946
mip-1(uae1)	3	27.001	0.935
mip-1(uae1)	3	27.502	0.936
mip-1(uae1)	3	28.001	0.943
mip-1(uae1)	3	28.501	0.944
mip-1(uae1)	3	29.001	0.963
mip-1(uae1)	3	29.502	0.975
mip-1(uae1)	3	30.001	0.971
mip-1(uae1)	3	30.502	0.999
mip-1(uae1)	3	31.001	0.989
mip-1(uae1)	3	31.501	1.006
mip-1(uae1)	3	32.001	1.001
mip-1(uae1)	3	32.502	0.982
mip-1(uae1)	3	33.001	0.983
mip-1(uae1)	3	33.501	0.973
mip-1(uae1)	3	34.001	0.972
mip-1(uae1)	3	34.502	0.955
mip-1(uae1)	3	35.001	0.972
mip-1(uae1)	3	35.502	0.982
mip-1(uae1)	3	36.001	1.005
mip-1(uae1)	3	36.501	0.992
mip-1(uae1)	3	37.001	0.98
mip-1(uae1)	3	37.502	1.002
mip-1(uae1)	3	38.001	1.024
mip-1(uae1)	3	38.501	0.998
mip-1(uae1)	3	39.001	1.016
mip-1(uae1)	3	39.502	1.031
mip-1(uae1)	3	40.001	1.041
mip-1(uae1)	3	40.502	1.054
mip-1(uae1)	3	41.002	1.048
mip-1(uae1)	3	41.501	1.019
mip-1(uae1)	3	42.001	1.04
mip-1(uae1)	3	42.502	1.036
mip-1(uae1)	3	43.001	1.061
mip-1(uae1)	3	43.502	1.066
mip-1(uae1)	3	44.001	1.055
mip-1(uae1)	3	44.501	1.069
mip-1(uae1)	3	45.001	1.054
mip-1(uae1)	3	45.502	1.037
mip-1(uae1)	3	46.002	1.033
mip-1(uae1)	3	46.501	1.037
mip-1(uae1)	3	47.001	1.049
mip-1(uae1)	3	47.502	1.045
mip-1(uae1)	3	48.001	1.068
mip-1(uae1)	3	48.502	1.044
mip-1(uae1)	3	49.001	1.065
mip-1(uae1)	3	49.501	1.059
mip-1(uae1)	3	50.001	1.058
mip-1(uae1)	3	50.502	1.024
mip-1(uae1)	3	51.002	1.05
mip-1(uae1)	3	51.501	1.054
mip-1(uae1)	3	52.001	1.031
mip-1(uae1)	3	52.502	1.032
mip-1(uae1)	3	53.001	1.012
mip-1(uae1)	3	53.502	0.99
mip-1(uae1)	3	54.001	0.996
mip-1(uae1)	3	54.501	0.972
mip-1(uae1)	3	55.001	0.962
mip-1(uae1)	3	55.502	0.946
mip-1(uae1)	3	56.002	0.933
mip-1(uae1)	3	56.501	0.951
WT	3	-1	1
WT	3	0	0.028
WT	3	0.501	0.057
WT	3	1.001	0.077
WT	3	1.501	0.1
WT	3	2.002	0.114
WT	3	2.501	0.125
WT	3	3.001	0.141
WT	3	3.501	0.157
WT	3	4.002	0.172
WT	3	4.501	0.178
WT	3	5.002	0.194
WT	3	5.501	0.204
WT	3	6.001	0.214
WT	3	6.501	0.234
WT	3	7.002	0.249
WT	3	7.501	0.266
WT	3	8.002	0.275
WT	3	8.501	0.304
WT	3	9.002	0.304
WT	3	9.501	0.323
WT	3	10.002	0.335
WT	3	10.502	0.341
WT	3	11.001	0.359
WT	3	11.501	0.371
WT	3	12.002	0.39
WT	3	12.501	0.396
WT	3	13.002	0.406
WT	3	13.501	0.421
WT	3	14.001	0.418
WT	3	14.501	0.435
WT	3	15.002	0.428
WT	3	15.502	0.462
WT	3	16.001	0.462
WT	3	16.501	0.477
WT	3	17.002	0.478
WT	3	17.501	0.482
WT	3	18.002	0.505
WT	3	18.501	0.503
WT	3	19.001	0.517
WT	3	19.501	0.536
WT	3	20.002	0.533
WT	3	20.502	0.557
WT	3	21.001	0.575
WT	3	21.501	0.589
WT	3	22.002	0.601
WT	3	22.501	0.611
WT	3	23.002	0.631
WT	3	23.501	0.628
WT	3	24.001	0.636
WT	3	24.501	0.642
WT	3	25.002	0.64
WT	3	25.502	0.649
WT	3	26.001	0.664
WT	3	26.501	0.684
WT	3	27.002	0.718
WT	3	27.501	0.706
WT	3	28.002	0.719
WT	3	28.501	0.729
WT	3	29.001	0.73
WT	3	29.501	0.755
WT	3	30.002	0.752
WT	3	30.501	0.754
WT	3	31.001	0.759
WT	3	31.501	0.764
WT	3	32.002	0.764
WT	3	32.501	0.769
WT	3	33.002	0.771
WT	3	33.501	0.786
WT	3	34.001	0.8
WT	3	34.501	0.821
WT	3	35.002	0.82
WT	3	35.501	0.829
WT	3	36.001	0.816
WT	3	36.501	0.8
WT	3	37.002	0.844
WT	3	37.501	0.855
WT	3	38.002	0.847
WT	3	38.501	0.856
WT	3	39.001	0.844
WT	3	39.501	0.858
WT	3	40.002	0.839
WT	3	40.501	0.861
WT	3	41.002	0.878
WT	3	41.501	0.881
WT	3	42.002	0.86
WT	3	42.501	0.886
WT	3	43.002	0.887
WT	3	43.502	0.917
WT	3	44.001	0.909
WT	3	44.501	0.919
WT	3	45.002	0.915
WT	3	45.501	0.911
WT	3	46.002	0.915
WT	3	46.501	0.918
WT	3	47.001	0.911
WT	3	47.501	0.918
WT	3	48.002	0.918
WT	3	48.502	0.944
WT	3	49.001	0.928
WT	3	49.501	0.918
WT	3	50.002	0.915
WT	3	50.501	0.891
WT	3	51.002	0.898
WT	3	51.501	0.915
WT	3	52.001	0.909
WT	3	52.501	0.899
WT	3	53.002	0.913
WT	3	53.502	0.91
WT	3	54.001	0.905
WT	3	54.501	0.912
WT	3	55.002	0.92
WT	3	55.501	0.921
WT	3	56.002	0.924
WT	3	56.501	0.94
WT	3	57.001	0.911
mip-1(uae1)	4	-1	1
mip-1(uae1)	4	0	0.345
mip-1(uae1)	4	0.501	0.372
mip-1(uae1)	4	1.001	0.402
mip-1(uae1)	4	1.501	0.429
mip-1(uae1)	4	2.002	0.467
mip-1(uae1)	4	2.501	0.502
mip-1(uae1)	4	3.001	0.527
mip-1(uae1)	4	3.501	0.547
mip-1(uae1)	4	4.002	0.574
mip-1(uae1)	4	4.501	0.61
mip-1(uae1)	4	5.002	0.616
mip-1(uae1)	4	5.501	0.641
mip-1(uae1)	4	6.001	0.678
mip-1(uae1)	4	6.501	0.688
mip-1(uae1)	4	7.002	0.714
mip-1(uae1)	4	7.501	0.745
mip-1(uae1)	4	8.002	0.769
mip-1(uae1)	4	8.501	0.786
mip-1(uae1)	4	9.002	0.8
mip-1(uae1)	4	9.501	0.827
mip-1(uae1)	4	10.002	0.834
mip-1(uae1)	4	10.502	0.835
mip-1(uae1)	4	11.001	0.858
mip-1(uae1)	4	11.501	0.871
mip-1(uae1)	4	12.002	0.883
mip-1(uae1)	4	12.501	0.896
mip-1(uae1)	4	13.002	0.902
mip-1(uae1)	4	13.501	0.908
mip-1(uae1)	4	14.001	0.908
mip-1(uae1)	4	14.501	0.905
mip-1(uae1)	4	15.002	0.906
mip-1(uae1)	4	15.502	0.876
mip-1(uae1)	4	16.001	0.86
mip-1(uae1)	4	16.501	0.844
mip-1(uae1)	4	17.002	0.875
mip-1(uae1)	4	17.501	0.868
mip-1(uae1)	4	18.002	0.885
mip-1(uae1)	4	18.501	0.878
mip-1(uae1)	4	19.001	0.902
mip-1(uae1)	4	19.501	0.903
mip-1(uae1)	4	20.002	0.909
mip-1(uae1)	4	20.502	0.921
mip-1(uae1)	4	21.001	0.921
mip-1(uae1)	4	21.501	0.913
mip-1(uae1)	4	22.002	0.93
mip-1(uae1)	4	22.501	0.924
mip-1(uae1)	4	23.002	0.919
mip-1(uae1)	4	23.501	0.898
mip-1(uae1)	4	24.001	0.898
mip-1(uae1)	4	24.501	0.904
mip-1(uae1)	4	25.002	0.908
mip-1(uae1)	4	25.502	0.909
mip-1(uae1)	4	26.001	0.914
mip-1(uae1)	4	26.501	0.918
mip-1(uae1)	4	27.002	0.919
mip-1(uae1)	4	27.501	0.916
mip-1(uae1)	4	28.002	0.933
mip-1(uae1)	4	28.501	0.948
mip-1(uae1)	4	29.001	0.943
mip-1(uae1)	4	29.501	0.943
mip-1(uae1)	4	30.002	0.926
mip-1(uae1)	4	30.501	0.903
mip-1(uae1)	4	31.001	0.889
mip-1(uae1)	4	31.501	0.911
mip-1(uae1)	4	32.002	0.945
mip-1(uae1)	4	32.501	0.977
mip-1(uae1)	4	33.002	0.997
mip-1(uae1)	4	33.501	1.006
mip-1(uae1)	4	34.001	1.009
mip-1(uae1)	4	34.501	1.017
mip-1(uae1)	4	35.002	1.012
mip-1(uae1)	4	35.501	1.004
mip-1(uae1)	4	36.001	0.999
mip-1(uae1)	4	36.501	0.992
mip-1(uae1)	4	37.002	0.999
mip-1(uae1)	4	37.501	1.022
mip-1(uae1)	4	38.002	1.026
mip-1(uae1)	4	38.501	1.034
mip-1(uae1)	4	39.001	1.038
mip-1(uae1)	4	39.501	1.023
mip-1(uae1)	4	40.002	1.025
mip-1(uae1)	4	40.501	1.033
mip-1(uae1)	4	41.002	1.044
mip-1(uae1)	4	41.501	1.049
mip-1(uae1)	4	42.002	1.038
mip-1(uae1)	4	42.501	1.033
mip-1(uae1)	4	43.002	1.04
mip-1(uae1)	4	43.502	1.041
mip-1(uae1)	4	44.001	1.037
mip-1(uae1)	4	44.501	1.048
mip-1(uae1)	4	45.002	1.057
mip-1(uae1)	4	45.501	1.052
mip-1(uae1)	4	46.002	1.051
mip-1(uae1)	4	46.501	1.041
mip-1(uae1)	4	47.001	1.034
mip-1(uae1)	4	47.501	1.035
mip-1(uae1)	4	48.002	1.041
mip-1(uae1)	4	48.502	1.043
mip-1(uae1)	4	49.001	1.031
mip-1(uae1)	4	49.501	1.032
mip-1(uae1)	4	50.002	1.033
mip-1(uae1)	4	50.501	1.026
mip-1(uae1)	4	51.002	1.038
mip-1(uae1)	4	51.501	1.046
mip-1(uae1)	4	52.001	1.049
mip-1(uae1)	4	52.501	1.042
mip-1(uae1)	4	53.002	1.031
mip-1(uae1)	4	53.502	1.031
mip-1(uae1)	4	54.001	1.009
mip-1(uae1)	4	54.501	1.015
mip-1(uae1)	4	55.002	1.017
mip-1(uae1)	4	55.501	1.014
mip-1(uae1)	4	56.002	1.004
mip-1(uae1)	4	56.501	1.01
mip-1(uae1)	4	57.001	0.999
WT	4	-1	1
WT	4	0	0.073
WT	4	0.501	0.116
WT	4	1.001	0.141
WT	4	1.501	0.157
WT	4	2.002	0.167
WT	4	2.501	0.187
WT	4	3.001	0.202
WT	4	3.501	0.221
WT	4	4.002	0.246
WT	4	4.501	0.243
WT	4	5.002	0.264
WT	4	5.501	0.279
WT	4	6.001	0.313
WT	4	6.501	0.328
WT	4	7.002	0.337
WT	4	7.501	0.334
WT	4	8.002	0.35
WT	4	8.501	0.361
WT	4	9.002	0.39
WT	4	9.501	0.401
WT	4	10.002	0.416
WT	4	10.502	0.414
WT	4	11.001	0.428
WT	4	11.501	0.464
WT	4	12.002	0.434
WT	4	12.501	0.469
WT	4	13.002	0.48
WT	4	13.501	0.493
WT	4	14.001	0.508
WT	4	14.501	0.498
WT	4	15.002	0.534
WT	4	15.502	0.54
WT	4	16.001	0.535
WT	4	16.501	0.559
WT	4	17.002	0.565
WT	4	17.501	0.566
WT	4	18.002	0.57
WT	4	18.501	0.59
WT	4	19.001	0.591
WT	4	19.501	0.611
WT	4	20.002	0.621
WT	4	20.502	0.625
WT	4	21.001	0.64
WT	4	21.501	0.62
WT	4	22.002	0.633
WT	4	22.501	0.639
WT	4	23.002	0.648
WT	4	23.501	0.667
WT	4	24.001	0.697
WT	4	24.501	0.669
WT	4	25.002	0.675
WT	4	25.502	0.695
WT	4	26.001	0.696
WT	4	26.501	0.729
WT	4	27.002	0.707
WT	4	27.501	0.754
WT	4	28.002	0.717
WT	4	28.501	0.726
WT	4	29.001	0.757
WT	4	29.501	0.748
WT	4	30.002	0.744
WT	4	30.501	0.768
WT	4	31.001	0.776
WT	4	31.501	0.76
WT	4	32.002	0.764
WT	4	32.501	0.771
WT	4	33.002	0.781
WT	4	33.501	0.794
WT	4	34.001	0.774
WT	4	34.501	0.802
WT	4	35.002	0.818
WT	4	35.501	0.794
WT	4	36.001	0.823
WT	4	36.501	0.808
WT	4	37.002	0.834
WT	4	37.501	0.849
WT	4	38.002	0.851
WT	4	38.501	0.822
WT	4	39.001	0.848
WT	4	39.501	0.83
WT	4	40.002	0.853
WT	4	40.501	0.819
WT	4	41.002	0.834
WT	4	41.501	0.838
WT	4	42.002	0.839
WT	4	42.501	0.872
WT	4	43.002	0.824
WT	4	43.502	0.883
WT	4	44.001	0.857
WT	4	44.501	0.866
WT	4	45.002	0.825
WT	4	45.501	0.855
WT	4	46.002	0.857
WT	4	46.501	0.834
WT	4	47.001	0.862
WT	4	47.501	0.885
WT	4	48.002	0.838
WT	4	48.502	0.877
WT	4	49.001	0.9
WT	4	49.501	0.89
WT	4	50.002	0.858
WT	4	50.501	0.919
WT	4	51.002	0.905
WT	4	51.501	0.897
WT	4	52.001	0.913
WT	4	52.501	0.952
WT	4	53.002	0.972
WT	4	53.502	0.943
WT	4	54.001	0.949
WT	4	54.501	0.971
WT	4	55.002	0.936
WT	4	55.501	0.951
WT	4	56.002	0.959
WT	4	56.501	0.998
WT	4	57.001	0.988
mip-1(uae1)	5	-1	1
mip-1(uae1)	5	0	0.177
mip-1(uae1)	5	0.501	0.332
mip-1(uae1)	5	1.001	0.393
mip-1(uae1)	5	1.501	0.442
mip-1(uae1)	5	2.002	0.472
mip-1(uae1)	5	2.501	0.502
mip-1(uae1)	5	3.001	0.549
mip-1(uae1)	5	3.501	0.584
mip-1(uae1)	5	4.002	0.603
mip-1(uae1)	5	4.501	0.601
mip-1(uae1)	5	5.002	0.62
mip-1(uae1)	5	5.501	0.649
mip-1(uae1)	5	6.001	0.681
mip-1(uae1)	5	6.501	0.679
mip-1(uae1)	5	7.002	0.732
mip-1(uae1)	5	7.501	0.731
mip-1(uae1)	5	8.002	0.744
mip-1(uae1)	5	8.501	0.753
mip-1(uae1)	5	9.002	0.741
mip-1(uae1)	5	9.501	0.783
mip-1(uae1)	5	10.002	0.79
mip-1(uae1)	5	10.502	0.781
mip-1(uae1)	5	11.001	0.778
mip-1(uae1)	5	11.501	0.8
mip-1(uae1)	5	12.002	0.773
mip-1(uae1)	5	12.501	0.829
mip-1(uae1)	5	13.002	0.815
mip-1(uae1)	5	13.501	0.812
mip-1(uae1)	5	14.001	0.849
mip-1(uae1)	5	14.501	0.839
mip-1(uae1)	5	15.002	0.85
mip-1(uae1)	5	15.502	0.839
mip-1(uae1)	5	16.001	0.871
mip-1(uae1)	5	16.501	0.865
mip-1(uae1)	5	17.002	0.86
mip-1(uae1)	5	17.501	0.868
mip-1(uae1)	5	18.002	0.877
mip-1(uae1)	5	18.501	0.875
mip-1(uae1)	5	19.001	0.885
mip-1(uae1)	5	19.501	0.89
mip-1(uae1)	5	20.002	0.902
mip-1(uae1)	5	20.502	0.892
mip-1(uae1)	5	21.001	0.901
mip-1(uae1)	5	21.501	0.896
mip-1(uae1)	5	22.002	0.908
mip-1(uae1)	5	22.501	0.902
mip-1(uae1)	5	23.002	0.931
mip-1(uae1)	5	23.501	0.941
mip-1(uae1)	5	24.001	0.9
mip-1(uae1)	5	24.501	0.921
mip-1(uae1)	5	25.002	0.914
mip-1(uae1)	5	25.502	0.929
mip-1(uae1)	5	26.001	0.926
mip-1(uae1)	5	26.501	0.942
mip-1(uae1)	5	27.002	0.93
mip-1(uae1)	5	27.501	0.925
mip-1(uae1)	5	28.002	0.944
mip-1(uae1)	5	28.501	0.936
mip-1(uae1)	5	29.001	0.953
mip-1(uae1)	5	29.501	0.952
mip-1(uae1)	5	30.002	0.937
mip-1(uae1)	5	30.501	0.967
mip-1(uae1)	5	31.001	0.938
mip-1(uae1)	5	31.501	0.967
mip-1(uae1)	5	32.002	0.954
mip-1(uae1)	5	32.501	0.958
mip-1(uae1)	5	33.002	0.975
mip-1(uae1)	5	33.501	0.953
mip-1(uae1)	5	34.001	0.941
mip-1(uae1)	5	34.501	0.975
mip-1(uae1)	5	35.002	0.972
mip-1(uae1)	5	35.501	0.94
mip-1(uae1)	5	36.001	0.954
mip-1(uae1)	5	36.501	0.949
mip-1(uae1)	5	37.002	1.002
mip-1(uae1)	5	37.501	0.952
mip-1(uae1)	5	38.002	0.97
mip-1(uae1)	5	38.501	0.975
mip-1(uae1)	5	39.001	0.962
mip-1(uae1)	5	39.501	0.989
mip-1(uae1)	5	40.002	0.986
mip-1(uae1)	5	40.501	0.985
mip-1(uae1)	5	41.002	0.976
mip-1(uae1)	5	41.501	1
mip-1(uae1)	5	42.002	1.006
mip-1(uae1)	5	42.501	0.985
mip-1(uae1)	5	43.002	0.983
mip-1(uae1)	5	43.502	1.004
mip-1(uae1)	5	44.001	1.047
mip-1(uae1)	5	44.501	0.995
mip-1(uae1)	5	45.002	1.029
mip-1(uae1)	5	45.501	1.031
mip-1(uae1)	5	46.002	1.044
mip-1(uae1)	5	46.501	1.056
mip-1(uae1)	5	47.001	1.054
mip-1(uae1)	5	47.501	1.024
mip-1(uae1)	5	48.002	1.075
mip-1(uae1)	5	48.502	1.078
mip-1(uae1)	5	49.001	1.044
mip-1(uae1)	5	49.501	1.077
mip-1(uae1)	5	50.002	1.057
mip-1(uae1)	5	50.501	1.077
mip-1(uae1)	5	51.002	1.09
mip-1(uae1)	5	51.501	1.074
mip-1(uae1)	5	52.001	1.087
mip-1(uae1)	5	52.501	1.116
mip-1(uae1)	5	53.002	1.069
mip-1(uae1)	5	53.502	1.083
mip-1(uae1)	5	54.001	1.072
mip-1(uae1)	5	54.501	1.105
mip-1(uae1)	5	55.002	1.101
mip-1(uae1)	5	55.501	1.091
mip-1(uae1)	5	56.002	1.104
mip-1(uae1)	5	56.501	1.076
WT	5	-1	1
WT	5	0	0.102
WT	5	0.502	0.127
WT	5	1.001	0.139
WT	5	1.502	0.151
WT	5	2.001	0.17
WT	5	2.502	0.185
WT	5	3.001	0.187
WT	5	3.502	0.211
WT	5	4.002	0.217
WT	5	4.502	0.231
WT	5	5.002	0.24
WT	5	5.502	0.243
WT	5	6.002	0.262
WT	5	6.502	0.274
WT	5	7.001	0.272
WT	5	7.502	0.289
WT	5	8.002	0.29
WT	5	8.502	0.32
WT	5	9.002	0.333
WT	5	9.502	0.342
WT	5	10.002	0.352
WT	5	10.502	0.36
WT	5	11.002	0.387
WT	5	11.502	0.414
WT	5	12.002	0.439
WT	5	12.502	0.442
WT	5	13.002	0.451
WT	5	13.502	0.474
WT	5	14.002	0.511
WT	5	14.502	0.533
WT	5	15.002	0.536
WT	5	15.502	0.542
WT	5	16.002	0.554
WT	5	16.502	0.561
WT	5	17.002	0.591
WT	5	17.502	0.573
WT	5	18.002	0.57
WT	5	18.502	0.579
WT	5	19.002	0.574
WT	5	19.502	0.602
WT	5	20.001	0.607
WT	5	20.502	0.623
WT	5	21.001	0.662
WT	5	21.502	0.671
WT	5	22.002	0.654
WT	5	22.502	0.672
WT	5	23.002	0.681
WT	5	23.502	0.682
WT	5	24.002	0.667
WT	5	24.502	0.658
WT	5	25.002	0.667
WT	5	25.502	0.67
WT	5	26.001	0.692
WT	5	26.502	0.712
WT	5	27.001	0.724
WT	5	27.502	0.696
WT	5	28.002	0.721
WT	5	28.502	0.751
WT	5	29.001	0.773
WT	5	29.502	0.767
WT	5	30.001	0.78
WT	5	30.502	0.754
WT	5	31.002	0.763
WT	5	31.502	0.741
WT	5	32.001	0.783
WT	5	32.502	0.767
WT	5	33.001	0.797
WT	5	33.502	0.807
WT	5	34.001	0.817
WT	5	34.502	0.864
WT	5	35.001	0.872
WT	5	35.502	0.833
WT	5	36.002	0.81
WT	5	36.502	0.783
WT	5	37.002	0.791
WT	5	37.502	0.77
WT	5	38.001	0.742
WT	5	38.502	0.738
WT	5	39.001	0.773
WT	5	39.502	0.768
WT	5	40.002	0.839
WT	5	40.502	0.852
WT	5	41.002	0.859
WT	5	41.503	0.87
WT	5	42.002	0.881
WT	5	42.502	0.909
WT	5	43.002	0.916
WT	5	43.503	0.978
WT	5	44.001	0.983
WT	5	44.503	1.01
WT	5	45.001	1.01
WT	5	45.502	0.999
WT	5	46.001	0.982
WT	5	46.502	0.983
WT	5	47.002	0.999
WT	5	47.502	0.982
WT	5	48.002	0.986
WT	5	48.502	0.974
WT	5	49.001	1.001
WT	5	49.502	1.013
WT	5	50.001	0.995
WT	5	50.502	0.957
WT	5	51.002	0.946
WT	5	51.502	0.959
WT	5	52.002	0.93
WT	5	52.502	0.898
WT	5	53.002	0.905
WT	5	53.502	0.869
WT	5	54.002	0.852
WT	5	54.502	0.838
WT	5	55.002	0.841
WT	5	55.502	0.844
WT	5	56.002	0.896
WT	5	56.502	0.915
WT	5	57.001	0.964
mip-1(uae1)	6	-1	1
mip-1(uae1)	6	0	0.169
mip-1(uae1)	6	0.501	0.327
mip-1(uae1)	6	1.001	0.411
mip-1(uae1)	6	1.501	0.466
mip-1(uae1)	6	2.002	0.514
mip-1(uae1)	6	2.501	0.553
mip-1(uae1)	6	3.001	0.58
mip-1(uae1)	6	3.501	0.598
mip-1(uae1)	6	4.002	0.61
mip-1(uae1)	6	4.501	0.653
mip-1(uae1)	6	5.002	0.649
mip-1(uae1)	6	5.501	0.658
mip-1(uae1)	6	6.001	0.677
mip-1(uae1)	6	6.501	0.694
mip-1(uae1)	6	7.002	0.715
mip-1(uae1)	6	7.501	0.716
mip-1(uae1)	6	8.002	0.718
mip-1(uae1)	6	8.501	0.723
mip-1(uae1)	6	9.002	0.74
mip-1(uae1)	6	9.501	0.747
mip-1(uae1)	6	10.002	0.758
mip-1(uae1)	6	10.502	0.773
mip-1(uae1)	6	11.001	0.769
mip-1(uae1)	6	11.501	0.792
mip-1(uae1)	6	12.002	0.784
mip-1(uae1)	6	12.501	0.789
mip-1(uae1)	6	13.002	0.803
mip-1(uae1)	6	13.501	0.8
mip-1(uae1)	6	14.001	0.812
mip-1(uae1)	6	14.501	0.822
mip-1(uae1)	6	15.002	0.836
mip-1(uae1)	6	15.502	0.84
mip-1(uae1)	6	16.001	0.835
mip-1(uae1)	6	16.501	0.846
mip-1(uae1)	6	17.002	0.863
mip-1(uae1)	6	17.501	0.861
mip-1(uae1)	6	18.002	0.858
mip-1(uae1)	6	18.501	0.863
mip-1(uae1)	6	19.001	0.885
mip-1(uae1)	6	19.501	0.891
mip-1(uae1)	6	20.002	0.898
mip-1(uae1)	6	20.502	0.891
mip-1(uae1)	6	21.001	0.904
mip-1(uae1)	6	21.501	0.915
mip-1(uae1)	6	22.002	0.911
mip-1(uae1)	6	22.501	0.928
mip-1(uae1)	6	23.002	0.934
mip-1(uae1)	6	23.501	0.928
mip-1(uae1)	6	24.001	0.928
mip-1(uae1)	6	24.501	0.927
mip-1(uae1)	6	25.002	0.938
mip-1(uae1)	6	25.502	0.946
mip-1(uae1)	6	26.001	0.964
mip-1(uae1)	6	26.501	0.949
mip-1(uae1)	6	27.002	0.966
mip-1(uae1)	6	27.501	0.952
mip-1(uae1)	6	28.002	0.986
mip-1(uae1)	6	28.501	0.961
mip-1(uae1)	6	29.001	1.001
mip-1(uae1)	6	29.501	0.995
mip-1(uae1)	6	30.002	0.998
mip-1(uae1)	6	30.501	0.996
mip-1(uae1)	6	31.001	0.994
mip-1(uae1)	6	31.501	0.994
mip-1(uae1)	6	32.002	1.008
mip-1(uae1)	6	32.501	1.003
mip-1(uae1)	6	33.002	0.996
mip-1(uae1)	6	33.501	1.027
mip-1(uae1)	6	34.001	1.002
mip-1(uae1)	6	34.501	1.014
mip-1(uae1)	6	35.002	1.014
mip-1(uae1)	6	35.501	0.999
mip-1(uae1)	6	36.001	1.007
mip-1(uae1)	6	36.501	1.009
mip-1(uae1)	6	37.002	0.972
mip-1(uae1)	6	37.501	0.986
mip-1(uae1)	6	38.002	0.982
mip-1(uae1)	6	38.501	1.001
mip-1(uae1)	6	39.001	1.016
mip-1(uae1)	6	39.501	0.988
mip-1(uae1)	6	40.002	1.007
mip-1(uae1)	6	40.501	1.004
mip-1(uae1)	6	41.002	1.019
mip-1(uae1)	6	41.501	1.023
mip-1(uae1)	6	42.002	1.014
mip-1(uae1)	6	42.501	0.997
mip-1(uae1)	6	43.002	0.981
mip-1(uae1)	6	43.502	0.993
mip-1(uae1)	6	44.001	0.999
mip-1(uae1)	6	44.501	1.004
mip-1(uae1)	6	45.002	1.01
mip-1(uae1)	6	45.501	1.025
mip-1(uae1)	6	46.002	1.024
mip-1(uae1)	6	46.501	1.023
mip-1(uae1)	6	47.001	1.016
mip-1(uae1)	6	47.501	1.03
mip-1(uae1)	6	48.002	1.048
mip-1(uae1)	6	48.502	1.043
mip-1(uae1)	6	49.001	1.065
mip-1(uae1)	6	49.501	1.027
mip-1(uae1)	6	50.002	1.031
mip-1(uae1)	6	50.501	1.024
mip-1(uae1)	6	51.002	1.025
mip-1(uae1)	6	51.501	1.014
mip-1(uae1)	6	52.001	1.026
mip-1(uae1)	6	52.501	1.028
mip-1(uae1)	6	53.002	1.022
mip-1(uae1)	6	53.502	1.044
mip-1(uae1)	6	54.001	1.038
mip-1(uae1)	6	54.501	1.049
mip-1(uae1)	6	55.002	1.029
mip-1(uae1)	6	55.501	1.053
mip-1(uae1)	6	56.002	1.043
mip-1(uae1)	6	56.501	1.036
mip-1(uae1)	6	57.001	1.044
WT	6	-1	1
WT	6	0	0.131
WT	6	0.501	0.194
WT	6	1.001	0.221
WT	6	1.502	0.257
WT	6	2.001	0.29
WT	6	2.502	0.319
WT	6	3.001	0.346
WT	6	3.501	0.36
WT	6	4.001	0.372
WT	6	4.502	0.404
WT	6	5.001	0.43
WT	6	5.501	0.439
WT	6	6.001	0.465
WT	6	6.502	0.474
WT	6	7.001	0.478
WT	6	7.502	0.512
WT	6	8.002	0.515
WT	6	8.501	0.545
WT	6	9.001	0.542
WT	6	9.502	0.556
WT	6	10.001	0.578
WT	6	10.502	0.576
WT	6	11.001	0.582
WT	6	11.501	0.588
WT	6	12.001	0.611
WT	6	12.502	0.626
WT	6	13.002	0.634
WT	6	13.501	0.614
WT	6	14.001	0.63
WT	6	14.502	0.641
WT	6	15.001	0.683
WT	6	15.502	0.692
WT	6	16.001	0.714
WT	6	16.501	0.743
WT	6	17.001	0.735
WT	6	17.502	0.741
WT	6	18.002	0.776
WT	6	18.501	0.769
WT	6	19.001	0.768
WT	6	19.502	0.779
WT	6	20.001	0.759
WT	6	20.502	0.768
WT	6	21.001	0.783
WT	6	21.501	0.779
WT	6	22.001	0.793
WT	6	22.502	0.797
WT	6	23.002	0.771
WT	6	23.501	0.82
WT	6	24.001	0.824
WT	6	24.502	0.808
WT	6	25.001	0.815
WT	6	25.502	0.826
WT	6	26.001	0.823
WT	6	26.501	0.81
WT	6	27.001	0.846
WT	6	27.502	0.868
WT	6	28.001	0.845
WT	6	28.501	0.857
WT	6	29.001	0.86
WT	6	29.502	0.848
WT	6	30.001	0.878
WT	6	30.502	0.894
WT	6	31.001	0.899
WT	6	31.501	0.899
WT	6	32.001	0.908
WT	6	32.502	0.908
WT	6	33.001	0.92
WT	6	33.501	0.898
WT	6	34.001	0.914
WT	6	34.502	0.917
WT	6	35.001	0.936
WT	6	35.502	0.946
WT	6	36.001	0.968
WT	6	36.501	0.967
WT	6	37.001	0.951
WT	6	37.502	0.949
WT	6	38.001	0.935
WT	6	38.501	0.984
WT	6	39.001	0.982
WT	6	39.502	0.969
WT	6	40.001	0.939
WT	6	40.502	0.955
WT	6	41.002	0.958
WT	6	41.501	0.955
WT	6	42.001	0.938
WT	6	42.502	0.96
WT	6	43.001	0.955
WT	6	43.502	0.936
WT	6	44.001	0.925
WT	6	44.501	0.903
WT	6	45.001	0.923
WT	6	45.502	0.892
WT	6	46.002	0.899
WT	6	46.501	0.899
WT	6	47.001	0.932
WT	6	47.502	0.941
WT	6	48.001	0.943
WT	6	48.502	0.949
WT	6	49.001	0.971
WT	6	49.501	0.956
WT	6	50.001	0.949
WT	6	50.502	0.938
WT	6	51.002	0.943
WT	6	51.501	0.897
WT	6	52.001	0.891
WT	6	52.502	0.894
WT	6	53.001	0.88
WT	6	53.502	0.887
WT	6	54.001	0.917
WT	6	54.501	0.906
WT	6	55.001	0.942
WT	6	55.502	0.939
WT	6	56.002	0.978
WT	6	56.501	1.015
WT	6	57.001	1.029
mip-1(uae1)	7	-1	1
mip-1(uae1)	7	0	0.16
mip-1(uae1)	7	0.501	0.268
mip-1(uae1)	7	1.001	0.352
mip-1(uae1)	7	1.501	0.4
mip-1(uae1)	7	2.002	0.453
mip-1(uae1)	7	2.501	0.482
mip-1(uae1)	7	3.001	0.506
mip-1(uae1)	7	3.501	0.559
mip-1(uae1)	7	4.002	0.58
mip-1(uae1)	7	4.501	0.601
mip-1(uae1)	7	5.002	0.605
mip-1(uae1)	7	5.501	0.617
mip-1(uae1)	7	6.001	0.652
mip-1(uae1)	7	6.501	0.674
mip-1(uae1)	7	7.002	0.702
mip-1(uae1)	7	7.501	0.686
mip-1(uae1)	7	8.002	0.688
mip-1(uae1)	7	8.501	0.71
mip-1(uae1)	7	9.002	0.717
mip-1(uae1)	7	9.501	0.714
mip-1(uae1)	7	10.002	0.726
mip-1(uae1)	7	10.502	0.711
mip-1(uae1)	7	11.001	0.721
mip-1(uae1)	7	11.501	0.739
mip-1(uae1)	7	12.002	0.751
mip-1(uae1)	7	12.501	0.751
mip-1(uae1)	7	13.002	0.772
mip-1(uae1)	7	13.501	0.781
mip-1(uae1)	7	14.001	0.796
mip-1(uae1)	7	14.501	0.83
mip-1(uae1)	7	15.002	0.845
mip-1(uae1)	7	15.502	0.859
mip-1(uae1)	7	16.001	0.888
mip-1(uae1)	7	16.501	0.896
mip-1(uae1)	7	17.002	0.886
mip-1(uae1)	7	17.501	0.91
mip-1(uae1)	7	18.002	0.876
mip-1(uae1)	7	18.501	0.871
mip-1(uae1)	7	19.001	0.906
mip-1(uae1)	7	19.501	0.906
mip-1(uae1)	7	20.002	0.912
mip-1(uae1)	7	20.502	0.932
mip-1(uae1)	7	21.001	0.943
mip-1(uae1)	7	21.501	0.945
mip-1(uae1)	7	22.002	0.938
mip-1(uae1)	7	22.501	0.937
mip-1(uae1)	7	23.002	0.951
mip-1(uae1)	7	23.501	0.931
mip-1(uae1)	7	24.001	0.956
mip-1(uae1)	7	24.501	0.932
mip-1(uae1)	7	25.002	0.935
mip-1(uae1)	7	25.502	0.933
mip-1(uae1)	7	26.001	0.953
mip-1(uae1)	7	26.501	1.008
mip-1(uae1)	7	27.002	0.978
mip-1(uae1)	7	27.501	1.001
mip-1(uae1)	7	28.002	0.988
mip-1(uae1)	7	28.501	0.99
mip-1(uae1)	7	29.001	0.974
mip-1(uae1)	7	29.501	0.988
mip-1(uae1)	7	30.002	0.979
mip-1(uae1)	7	30.501	0.977
mip-1(uae1)	7	31.001	0.964
mip-1(uae1)	7	31.501	0.962
mip-1(uae1)	7	32.002	0.958
mip-1(uae1)	7	32.501	0.954
mip-1(uae1)	7	33.002	0.968
mip-1(uae1)	7	33.501	0.964
mip-1(uae1)	7	34.001	0.946
mip-1(uae1)	7	34.501	0.956
mip-1(uae1)	7	35.002	0.97
mip-1(uae1)	7	35.501	0.974
mip-1(uae1)	7	36.001	1
mip-1(uae1)	7	36.501	0.999
mip-1(uae1)	7	37.002	1.004
mip-1(uae1)	7	37.501	1.011
mip-1(uae1)	7	38.002	1.043
mip-1(uae1)	7	38.501	1.028
mip-1(uae1)	7	39.001	1.025
mip-1(uae1)	7	39.501	1.029
mip-1(uae1)	7	40.002	1.039
mip-1(uae1)	7	40.501	1.048
mip-1(uae1)	7	41.002	1.04
mip-1(uae1)	7	41.501	1.054
mip-1(uae1)	7	42.002	1.031
mip-1(uae1)	7	42.501	1.008
mip-1(uae1)	7	43.002	1.03
mip-1(uae1)	7	43.502	1.005
mip-1(uae1)	7	44.001	1
mip-1(uae1)	7	44.501	1.013
mip-1(uae1)	7	45.002	1.004
mip-1(uae1)	7	45.501	1.016
mip-1(uae1)	7	46.002	0.99
mip-1(uae1)	7	46.501	0.978
mip-1(uae1)	7	47.001	0.986
mip-1(uae1)	7	47.501	0.997
mip-1(uae1)	7	48.002	1.005
mip-1(uae1)	7	48.502	1.004
mip-1(uae1)	7	49.001	0.977
mip-1(uae1)	7	49.501	0.998
mip-1(uae1)	7	50.002	1.008
mip-1(uae1)	7	50.501	0.98
mip-1(uae1)	7	51.002	0.996
mip-1(uae1)	7	51.501	0.991
mip-1(uae1)	7	52.001	1.006
mip-1(uae1)	7	52.501	1.026
mip-1(uae1)	7	53.002	1.021
mip-1(uae1)	7	53.502	1.026
mip-1(uae1)	7	54.001	1.02
mip-1(uae1)	7	54.501	1.022
mip-1(uae1)	7	55.002	1.043
mip-1(uae1)	7	55.501	1.047
mip-1(uae1)	7	56.002	1.042
mip-1(uae1)	7	56.501	1.03
mip-1(uae1)	7	57.001	1.023
WT	7	-1	1
WT	7	0	0.09
WT	7	0.501	0.134
WT	7	1.001	0.158
WT	7	1.502	0.179
WT	7	2.001	0.21
WT	7	2.502	0.215
WT	7	3.001	0.248
WT	7	3.501	0.251
WT	7	4.001	0.264
WT	7	4.502	0.281
WT	7	5.001	0.298
WT	7	5.501	0.309
WT	7	6.001	0.314
WT	7	6.502	0.334
WT	7	7.001	0.347
WT	7	7.502	0.372
WT	7	8.002	0.383
WT	7	8.501	0.402
WT	7	9.001	0.416
WT	7	9.502	0.417
WT	7	10.001	0.432
WT	7	10.502	0.427
WT	7	11.001	0.438
WT	7	11.501	0.463
WT	7	12.001	0.475
WT	7	12.502	0.478
WT	7	13.002	0.479
WT	7	13.501	0.484
WT	7	14.001	0.5
WT	7	14.502	0.517
WT	7	15.001	0.507
WT	7	15.502	0.53
WT	7	16.001	0.536
WT	7	16.501	0.55
WT	7	17.001	0.562
WT	7	17.502	0.561
WT	7	18.002	0.573
WT	7	18.501	0.585
WT	7	19.001	0.591
WT	7	19.502	0.608
WT	7	20.001	0.614
WT	7	20.502	0.615
WT	7	21.001	0.634
WT	7	21.501	0.643
WT	7	22.001	0.637
WT	7	22.502	0.653
WT	7	23.002	0.66
WT	7	23.501	0.65
WT	7	24.001	0.678
WT	7	24.502	0.671
WT	7	25.001	0.688
WT	7	25.502	0.683
WT	7	26.001	0.69
WT	7	26.501	0.701
WT	7	27.001	0.713
WT	7	27.502	0.718
WT	7	28.001	0.714
WT	7	28.501	0.717
WT	7	29.001	0.734
WT	7	29.502	0.746
WT	7	30.001	0.749
WT	7	30.502	0.752
WT	7	31.001	0.782
WT	7	31.501	0.765
WT	7	32.001	0.773
WT	7	32.502	0.771
WT	7	33.001	0.773
WT	7	33.501	0.793
WT	7	34.001	0.772
WT	7	34.502	0.78
WT	7	35.001	0.786
WT	7	35.502	0.809
WT	7	36.001	0.814
WT	7	36.501	0.807
WT	7	37.001	0.833
WT	7	37.502	0.827
WT	7	38.001	0.832
WT	7	38.501	0.842
WT	7	39.001	0.851
WT	7	39.502	0.847
WT	7	40.001	0.852
WT	7	40.502	0.858
WT	7	41.002	0.874
WT	7	41.501	0.863
WT	7	42.001	0.867
WT	7	42.502	0.89
WT	7	43.001	0.899
WT	7	43.502	0.884
WT	7	44.001	0.882
WT	7	44.501	0.888
WT	7	45.001	0.909
WT	7	45.502	0.922
WT	7	46.002	0.907
WT	7	46.501	0.908
WT	7	47.001	0.917
WT	7	47.502	0.911
WT	7	48.001	0.919
WT	7	48.502	0.926
WT	7	49.001	0.919
WT	7	49.501	0.933
WT	7	50.001	0.922
WT	7	50.502	0.944
WT	7	51.002	0.957
WT	7	51.501	0.964
WT	7	52.001	0.932
WT	7	52.502	0.935
WT	7	53.001	0.955
WT	7	53.502	0.938
WT	7	54.001	0.929
WT	7	54.501	0.935
WT	7	55.001	0.94
WT	7	55.502	0.942
WT	7	56.002	0.953
WT	7	56.501	0.966
WT	7	57.001	0.969
mip-1(uae1)	8	-1	1
mip-1(uae1)	8	0	0.376
mip-1(uae1)	8	0.501	0.477
mip-1(uae1)	8	1.001	0.514
mip-1(uae1)	8	1.501	0.553
mip-1(uae1)	8	2.002	0.585
mip-1(uae1)	8	2.501	0.604
mip-1(uae1)	8	3.001	0.614
mip-1(uae1)	8	3.501	0.64
mip-1(uae1)	8	4.002	0.664
mip-1(uae1)	8	4.501	0.692
mip-1(uae1)	8	5.002	0.713
mip-1(uae1)	8	5.501	0.72
mip-1(uae1)	8	6.001	0.738
mip-1(uae1)	8	6.501	0.735
mip-1(uae1)	8	7.002	0.749
mip-1(uae1)	8	7.501	0.767
mip-1(uae1)	8	8.002	0.775
mip-1(uae1)	8	8.501	0.778
mip-1(uae1)	8	9.002	0.795
mip-1(uae1)	8	9.501	0.812
mip-1(uae1)	8	10.002	0.808
mip-1(uae1)	8	10.502	0.828
mip-1(uae1)	8	11.001	0.852
mip-1(uae1)	8	11.501	0.868
mip-1(uae1)	8	12.002	0.884
mip-1(uae1)	8	12.501	0.906
mip-1(uae1)	8	13.002	0.917
mip-1(uae1)	8	13.501	0.917
mip-1(uae1)	8	14.001	0.919
mip-1(uae1)	8	14.501	0.909
mip-1(uae1)	8	15.002	0.892
mip-1(uae1)	8	15.502	0.901
mip-1(uae1)	8	16.001	0.913
mip-1(uae1)	8	16.501	0.913
mip-1(uae1)	8	17.002	0.911
mip-1(uae1)	8	17.501	0.921
mip-1(uae1)	8	18.002	0.925
mip-1(uae1)	8	18.501	0.951
mip-1(uae1)	8	19.001	0.961
mip-1(uae1)	8	19.501	0.956
mip-1(uae1)	8	20.002	0.948
mip-1(uae1)	8	20.502	0.962
mip-1(uae1)	8	21.001	0.954
mip-1(uae1)	8	21.501	0.963
mip-1(uae1)	8	22.002	0.959
mip-1(uae1)	8	22.501	0.981
mip-1(uae1)	8	23.002	0.969
mip-1(uae1)	8	23.501	0.96
mip-1(uae1)	8	24.001	0.977
mip-1(uae1)	8	24.501	0.981
mip-1(uae1)	8	25.002	0.985
mip-1(uae1)	8	25.502	0.975
mip-1(uae1)	8	26.001	1.002
mip-1(uae1)	8	26.501	1.015
mip-1(uae1)	8	27.002	0.994
mip-1(uae1)	8	27.501	1.027
mip-1(uae1)	8	28.002	1.016
mip-1(uae1)	8	28.501	1.04
mip-1(uae1)	8	29.001	1.031
mip-1(uae1)	8	29.501	1.014
mip-1(uae1)	8	30.002	1.019
mip-1(uae1)	8	30.501	1.034
mip-1(uae1)	8	31.001	1.046
mip-1(uae1)	8	31.501	1.055
mip-1(uae1)	8	32.002	1.063
mip-1(uae1)	8	32.501	1.067
mip-1(uae1)	8	33.002	1.07
mip-1(uae1)	8	33.501	1.071
mip-1(uae1)	8	34.001	1.056
mip-1(uae1)	8	34.501	1.037
mip-1(uae1)	8	35.002	1.055
mip-1(uae1)	8	35.501	1.038
mip-1(uae1)	8	36.001	1.032
mip-1(uae1)	8	36.501	1.028
mip-1(uae1)	8	37.002	1.009
mip-1(uae1)	8	37.501	1.015
mip-1(uae1)	8	38.002	0.985
mip-1(uae1)	8	38.501	0.978
mip-1(uae1)	8	39.001	0.968
mip-1(uae1)	8	39.501	0.983
mip-1(uae1)	8	40.002	1.004
mip-1(uae1)	8	40.501	0.977
mip-1(uae1)	8	41.002	0.987
mip-1(uae1)	8	41.501	0.979
mip-1(uae1)	8	42.002	0.985
mip-1(uae1)	8	42.501	0.99
mip-1(uae1)	8	43.002	1.022
mip-1(uae1)	8	43.502	1.016
mip-1(uae1)	8	44.001	1.013
mip-1(uae1)	8	44.501	1.02
mip-1(uae1)	8	45.002	0.993
mip-1(uae1)	8	45.501	1.016
mip-1(uae1)	8	46.002	0.996
mip-1(uae1)	8	46.501	0.991
mip-1(uae1)	8	47.001	0.976
mip-1(uae1)	8	47.501	0.959
mip-1(uae1)	8	48.002	0.95
mip-1(uae1)	8	48.502	0.959
mip-1(uae1)	8	49.001	0.962
mip-1(uae1)	8	49.501	0.966
mip-1(uae1)	8	50.002	0.975
mip-1(uae1)	8	50.501	0.964
mip-1(uae1)	8	51.002	0.943
mip-1(uae1)	8	51.501	0.93
mip-1(uae1)	8	52.001	0.953
mip-1(uae1)	8	52.501	0.95
mip-1(uae1)	8	53.002	0.971
mip-1(uae1)	8	53.502	0.986
mip-1(uae1)	8	54.001	0.986
mip-1(uae1)	8	54.501	0.979
mip-1(uae1)	8	55.002	0.969
mip-1(uae1)	8	55.501	0.977
mip-1(uae1)	8	56.002	0.987
mip-1(uae1)	8	56.501	0.969
mip-1(uae1)	8	57.001	0.967
WT	8	-1	1
WT	8	0	0.082
WT	8	0.501	0.113
WT	8	1.001	0.144
WT	8	1.502	0.157
WT	8	2.001	0.166
WT	8	2.502	0.18
WT	8	3.001	0.193
WT	8	3.501	0.212
WT	8	4.001	0.232
WT	8	4.502	0.231
WT	8	5.001	0.26
WT	8	5.501	0.27
WT	8	6.001	0.277
WT	8	6.502	0.289
WT	8	7.001	0.294
WT	8	7.502	0.308
WT	8	8.002	0.327
WT	8	8.501	0.346
WT	8	9.001	0.36
WT	8	9.502	0.371
WT	8	10.001	0.389
WT	8	10.502	0.404
WT	8	11.001	0.409
WT	8	11.501	0.428
WT	8	12.001	0.429
WT	8	12.502	0.437
WT	8	13.002	0.45
WT	8	13.501	0.457
WT	8	14.001	0.471
WT	8	14.502	0.478
WT	8	15.001	0.501
WT	8	15.502	0.511
WT	8	16.001	0.519
WT	8	16.501	0.529
WT	8	17.001	0.521
WT	8	17.502	0.53
WT	8	18.002	0.535
WT	8	18.501	0.547
WT	8	19.001	0.558
WT	8	19.502	0.579
WT	8	20.001	0.586
WT	8	20.502	0.592
WT	8	21.001	0.601
WT	8	21.501	0.611
WT	8	22.001	0.612
WT	8	22.502	0.635
WT	8	23.002	0.625
WT	8	23.501	0.641
WT	8	24.001	0.651
WT	8	24.502	0.658
WT	8	25.001	0.67
WT	8	25.502	0.681
WT	8	26.001	0.691
WT	8	26.501	0.692
WT	8	27.001	0.704
WT	8	27.502	0.717
WT	8	28.001	0.714
WT	8	28.501	0.725
WT	8	29.001	0.737
WT	8	29.502	0.749
WT	8	30.001	0.752
WT	8	30.502	0.769
WT	8	31.001	0.777
WT	8	31.501	0.792
WT	8	32.001	0.796
WT	8	32.502	0.806
WT	8	33.001	0.798
WT	8	33.501	0.809
WT	8	34.001	0.813
WT	8	34.502	0.806
WT	8	35.001	0.803
WT	8	35.502	0.797
WT	8	36.001	0.799
WT	8	36.501	0.787
WT	8	37.001	0.785
WT	8	37.502	0.798
WT	8	38.001	0.797
WT	8	38.501	0.798
WT	8	39.001	0.81
WT	8	39.502	0.835
WT	8	40.001	0.837
WT	8	40.502	0.856
WT	8	41.002	0.865
WT	8	41.501	0.867
WT	8	42.001	0.86
WT	8	42.502	0.865
WT	8	43.001	0.866
WT	8	43.502	0.906
WT	8	44.001	0.876
WT	8	44.501	0.904
WT	8	45.001	0.901
WT	8	45.502	0.922
WT	8	46.002	0.92
WT	8	46.501	0.907
WT	8	47.001	0.906
WT	8	47.502	0.902
WT	8	48.001	0.901
WT	8	48.502	0.907
WT	8	49.001	0.909
WT	8	49.501	0.912
WT	8	50.001	0.911
WT	8	50.502	0.911
WT	8	51.002	0.911
WT	8	51.501	0.928
WT	8	52.001	0.912
WT	8	52.502	0.93
WT	8	53.001	0.904
WT	8	53.502	0.897
WT	8	54.001	0.915
WT	8	54.501	0.94
WT	8	55.001	0.919
WT	8	55.502	0.953
WT	8	56.002	0.946
WT	8	56.501	0.945
WT	8	57.001	0.947
mip-1(uae1)	9	-1	1
mip-1(uae1)	9	0	0.496
mip-1(uae1)	9	0.501	0.56
mip-1(uae1)	9	1.001	0.601
mip-1(uae1)	9	1.502	0.635
mip-1(uae1)	9	2.001	0.645
mip-1(uae1)	9	2.502	0.683
mip-1(uae1)	9	3.001	0.69
mip-1(uae1)	9	3.501	0.733
mip-1(uae1)	9	4.001	0.738
mip-1(uae1)	9	4.502	0.767
mip-1(uae1)	9	5.001	0.785
mip-1(uae1)	9	5.501	0.794
mip-1(uae1)	9	6.001	0.801
mip-1(uae1)	9	6.502	0.825
mip-1(uae1)	9	7.001	0.844
mip-1(uae1)	9	7.502	0.861
mip-1(uae1)	9	8.002	0.877
mip-1(uae1)	9	8.501	0.888
mip-1(uae1)	9	9.001	0.89
mip-1(uae1)	9	9.502	0.894
mip-1(uae1)	9	10.001	0.897
mip-1(uae1)	9	10.502	0.909
mip-1(uae1)	9	11.001	0.902
mip-1(uae1)	9	11.501	0.907
mip-1(uae1)	9	12.001	0.915
mip-1(uae1)	9	12.502	0.927
mip-1(uae1)	9	13.002	0.94
mip-1(uae1)	9	13.501	0.941
mip-1(uae1)	9	14.001	0.936
mip-1(uae1)	9	14.502	0.939
mip-1(uae1)	9	15.001	0.946
mip-1(uae1)	9	15.502	0.95
mip-1(uae1)	9	16.001	0.95
mip-1(uae1)	9	16.501	0.952
mip-1(uae1)	9	17.001	0.952
mip-1(uae1)	9	17.502	0.957
mip-1(uae1)	9	18.002	0.954
mip-1(uae1)	9	18.501	0.964
mip-1(uae1)	9	19.001	0.971
mip-1(uae1)	9	19.502	0.963
mip-1(uae1)	9	20.001	0.971
mip-1(uae1)	9	20.502	0.959
mip-1(uae1)	9	21.001	0.954
mip-1(uae1)	9	21.501	0.963
mip-1(uae1)	9	22.001	0.974
mip-1(uae1)	9	22.502	0.973
mip-1(uae1)	9	23.002	0.975
mip-1(uae1)	9	23.501	0.963
mip-1(uae1)	9	24.001	0.961
mip-1(uae1)	9	24.502	0.967
mip-1(uae1)	9	25.001	0.961
mip-1(uae1)	9	25.502	0.962
mip-1(uae1)	9	26.001	0.96
mip-1(uae1)	9	26.501	0.967
mip-1(uae1)	9	27.001	0.974
mip-1(uae1)	9	27.502	0.974
mip-1(uae1)	9	28.001	0.974
mip-1(uae1)	9	28.501	0.975
mip-1(uae1)	9	29.001	0.971
mip-1(uae1)	9	29.502	0.974
mip-1(uae1)	9	30.001	0.969
mip-1(uae1)	9	30.502	0.973
mip-1(uae1)	9	31.001	0.976
mip-1(uae1)	9	31.501	0.975
mip-1(uae1)	9	32.001	0.978
mip-1(uae1)	9	32.502	0.973
mip-1(uae1)	9	33.001	0.979
mip-1(uae1)	9	33.501	0.978
mip-1(uae1)	9	34.001	0.979
mip-1(uae1)	9	34.502	0.98
mip-1(uae1)	9	35.001	0.98
mip-1(uae1)	9	35.502	0.973
mip-1(uae1)	9	36.001	0.983
mip-1(uae1)	9	36.501	0.975
mip-1(uae1)	9	37.001	0.99
mip-1(uae1)	9	37.502	0.982
mip-1(uae1)	9	38.001	0.989
mip-1(uae1)	9	38.501	0.989
mip-1(uae1)	9	39.001	0.996
mip-1(uae1)	9	39.502	0.998
mip-1(uae1)	9	40.001	0.999
mip-1(uae1)	9	40.502	1
mip-1(uae1)	9	41.002	1.006
mip-1(uae1)	9	41.501	1.006
mip-1(uae1)	9	42.001	1.003
mip-1(uae1)	9	42.502	1.011
mip-1(uae1)	9	43.001	1.012
mip-1(uae1)	9	43.502	1.015
mip-1(uae1)	9	44.001	1.008
mip-1(uae1)	9	44.501	1.002
mip-1(uae1)	9	45.001	1.01
mip-1(uae1)	9	45.502	1
mip-1(uae1)	9	46.002	1.003
mip-1(uae1)	9	46.501	1.002
mip-1(uae1)	9	47.001	0.998
mip-1(uae1)	9	47.502	1.01
mip-1(uae1)	9	48.001	1.006
mip-1(uae1)	9	48.502	1.008
mip-1(uae1)	9	49.001	1.007
mip-1(uae1)	9	49.501	1.015
mip-1(uae1)	9	50.001	1.019
mip-1(uae1)	9	50.502	1.025
mip-1(uae1)	9	51.002	1.026
mip-1(uae1)	9	51.501	1.027
mip-1(uae1)	9	52.001	1.026
mip-1(uae1)	9	52.502	1.035
mip-1(uae1)	9	53.001	1.031
mip-1(uae1)	9	53.502	1.03
mip-1(uae1)	9	54.001	1.032
mip-1(uae1)	9	54.501	1.037
mip-1(uae1)	9	55.001	1.033
mip-1(uae1)	9	55.502	1.035
mip-1(uae1)	9	56.002	1.027
mip-1(uae1)	9	56.501	1.028
mip-1(uae1)	9	57.001	1.03
WT	9	-1	1
WT	9	0	0.074
WT	9	0.501	0.119
WT	9	1.001	0.131
WT	9	1.502	0.159
WT	9	2.001	0.171
WT	9	2.502	0.21
WT	9	3.001	0.212
WT	9	3.501	0.227
WT	9	4.001	0.242
WT	9	4.502	0.261
WT	9	5.001	0.281
WT	9	5.501	0.291
WT	9	6.001	0.323
WT	9	6.502	0.322
WT	9	7.001	0.354
WT	9	7.502	0.353
WT	9	8.002	0.362
WT	9	8.501	0.366
WT	9	9.001	0.382
WT	9	9.502	0.378
WT	9	10.001	0.411
WT	9	10.502	0.422
WT	9	11.001	0.433
WT	9	11.501	0.468
WT	9	12.001	0.467
WT	9	12.502	0.48
WT	9	13.002	0.489
[truncated: 552 more rows]

## Sheet: Figure_8E.2
Figure 8E.2. Quantification of recovery rates from FRAP data of GFP::GLH-1 in P3 cells of WT and mip-1(uae1) null embryos (n=10 replicates each). Units: 1/sec.
Genetic_Background	Replicate	K1
WT	1	0.0513
WT	2	0.0478
WT	3	0.0571
WT	4	0.0447
WT	5	0.045
WT	6	0.0486
WT	7	0.0441
WT	8	0.0467
WT	9	0.0505
WT	10	0.0481
WT	11	0.0469
WT	12	0.0444
mip-1(uae1)	1	0.1176
mip-1(uae1)	2	0.1324
mip-1(uae1)	3	0.1267
mip-1(uae1)	4	0.1241
mip-1(uae1)	5	0.1252
mip-1(uae1)	6	0.1211
mip-1(uae1)	7	0.1367
mip-1(uae1)	8	0.1412
mip-1(uae1)	9	0.1276
mip-1(uae1)	10	0.1226
