# Supplementary material for: Novel LOTUS-domain proteins are organizational hubs that recruit C. elegans Vasa to germ granules
Source: eLife. 2021 Jul 5;10:e60833. doi: 10.7554/eLife.60833 (PMC8331183; doi:10.7554/eLife.60833)
Supplement: Figure 9—figure supplement 1—source data 1. [file elife-60833-fig9-figsupp1-data1.xlsx]

## Sheet: Figure_9_S1
Figure 9 - Figure supplement 1: Quantification of MIP-1::GFP and MIP-2::mCherry granule volume in WT and mip-1(uae1) null or mip-2(uae2) null embryos. Units for Volume: u^3.
Protein	Strain	Volume
MIP-2	WT	3.546
MIP-2	WT	6.14
MIP-2	WT	7.666
MIP-2	WT	3.063
MIP-2	WT	3.018
MIP-2	WT	1.581
MIP-2	WT	2.773
MIP-2	WT	2.335
MIP-2	WT	1.175
MIP-2	WT	10.094
MIP-2	WT	2.607
MIP-2	WT	9.008
MIP-2	WT	5.282
MIP-2	WT	9.348
MIP-2	WT	1.898
MIP-2	WT	3.616
MIP-2	WT	1.344
MIP-2	WT	8.047
MIP-2	WT	1.031
MIP-2	WT	6.261
MIP-2	WT	3.785
MIP-2	WT	2.233
MIP-2	WT	1.153
MIP-2	WT	8.685
MIP-2	WT	1.828
MIP-2	WT	1.424
MIP-2	WT	1.149
MIP-2	WT	2.538
MIP-2	WT	1.724
MIP-2	WT	1.298
MIP-2	WT	1.09
MIP-2	WT	4.852
MIP-2	WT	2.345
MIP-2	WT	6.089
MIP-2	WT	4.695
MIP-2	WT	3.034
MIP-2	WT	1.368
MIP-2	WT	2.653
MIP-2	WT	4.564
MIP-2	WT	6.233
MIP-2	WT	2.657
MIP-2	WT	2.175
MIP-2	WT	2.142
MIP-2	WT	1.226
MIP-2	WT	5.355
MIP-2	WT	4.245
MIP-2	WT	1.179
MIP-2	WT	1.455
MIP-2	WT	3.643
MIP-2	WT	5.432
MIP-2	WT	12.29
MIP-2	WT	2.856
MIP-2	WT	2.462
MIP-2	WT	1.147
MIP-2	WT	7.506
MIP-2	WT	4.937
MIP-2	WT	1.563
MIP-2	WT	4.644
MIP-2	WT	3.742
MIP-2	WT	5.906
MIP-2	WT	2.206
MIP-2	WT	1.683
MIP-2	WT	2.163
MIP-2	WT	4.291
MIP-2	WT	12.894
MIP-2	WT	1.911
MIP-2	WT	2.141
MIP-2	WT	4.917
MIP-2	WT	3.287
MIP-2	WT	5.109
MIP-2	WT	1.185
MIP-2	WT	9.232
MIP-2	WT	1.082
MIP-2	WT	1.83
MIP-2	WT	11.623
MIP-2	WT	3.746
MIP-2	WT	2.471
MIP-2	WT	13.563
MIP-2	WT	2.175
MIP-2	WT	1.037
MIP-2	WT	9.599
MIP-2	WT	1.57
MIP-2	WT	3.496
MIP-2	WT	4.802
MIP-2	WT	1.676
MIP-2	WT	12.757
MIP-2	WT	1.795
MIP-2	WT	2.189
MIP-2	WT	12.524
MIP-2	WT	4.478
MIP-2	WT	1.371
MIP-2	WT	4.574
MIP-2	WT	1.621
MIP-2	WT	3.842
MIP-2	WT	1.191
MIP-2	WT	6.836
MIP-2	WT	2.893
MIP-2	WT	3.481
MIP-2	WT	1.479
MIP-2	WT	2.345
MIP-2	WT	6.209
MIP-2	WT	1.735
MIP-2	WT	9.482
MIP-2	WT	1.179
MIP-2	WT	1.691
MIP-2	WT	1.099
MIP-2	WT	4.102
MIP-2	WT	6.107
MIP-2	WT	2.39
MIP-2	WT	1.662
MIP-2	WT	3.324
MIP-2	WT	2.497
MIP-2	WT	1.573
MIP-2	WT	3.866
MIP-2	WT	3.839
MIP-2	WT	2.348
MIP-2	WT	2.742
MIP-2	WT	5.974
MIP-2	WT	1.831
MIP-2	WT	1.007
MIP-2	WT	1.517
MIP-2	WT	8.475
MIP-2	WT	1.433
MIP-2	mip-1(uae1)	2.517
MIP-2	mip-1(uae1)	2.791
MIP-2	mip-1(uae1)	1.152
MIP-2	mip-1(uae1)	4.603
MIP-2	mip-1(uae1)	2.48
MIP-2	mip-1(uae1)	6.131
MIP-2	mip-1(uae1)	3.634
MIP-2	mip-1(uae1)	6.913
MIP-2	mip-1(uae1)	2.598
MIP-2	mip-1(uae1)	9.858
MIP-2	mip-1(uae1)	5.847
MIP-2	mip-1(uae1)	2.266
MIP-2	mip-1(uae1)	1.997
MIP-2	mip-1(uae1)	2.269
MIP-2	mip-1(uae1)	1.748
MIP-2	mip-1(uae1)	2.992
MIP-2	mip-1(uae1)	1.534
MIP-2	mip-1(uae1)	1.774
MIP-2	mip-1(uae1)	3.638
MIP-2	mip-1(uae1)	9.531
MIP-2	mip-1(uae1)	4.298
MIP-2	mip-1(uae1)	2.582
MIP-2	mip-1(uae1)	11.384
MIP-2	mip-1(uae1)	1.874
MIP-2	mip-1(uae1)	1.464
MIP-2	mip-1(uae1)	4.849
MIP-2	mip-1(uae1)	1.316
MIP-2	mip-1(uae1)	4.543
MIP-2	mip-1(uae1)	3.835
MIP-2	mip-1(uae1)	1.315
MIP-2	mip-1(uae1)	12.426
MIP-2	mip-1(uae1)	1.576
MIP-2	mip-1(uae1)	2.855
MIP-2	mip-1(uae1)	2.24
MIP-2	mip-1(uae1)	1.138
MIP-2	mip-1(uae1)	3.41
MIP-2	mip-1(uae1)	1.848
MIP-2	mip-1(uae1)	10.628
MIP-2	mip-1(uae1)	8.83
MIP-2	mip-1(uae1)	4.742
MIP-2	mip-1(uae1)	2.986
MIP-2	mip-1(uae1)	1.412
MIP-2	mip-1(uae1)	1.605
MIP-2	mip-1(uae1)	3.258
MIP-2	mip-1(uae1)	1.741
MIP-2	mip-1(uae1)	1.259
MIP-2	mip-1(uae1)	2.775
MIP-2	mip-1(uae1)	12.961
MIP-2	mip-1(uae1)	4.73
MIP-2	mip-1(uae1)	10.295
MIP-2	mip-1(uae1)	8.14
MIP-2	mip-1(uae1)	2.204
MIP-2	mip-1(uae1)	13.808
MIP-2	mip-1(uae1)	14.639
MIP-2	mip-1(uae1)	4.993
MIP-2	mip-1(uae1)	14.867
MIP-2	mip-1(uae1)	1.046
MIP-2	mip-1(uae1)	1.027
MIP-2	mip-1(uae1)	2.24
MIP-2	mip-1(uae1)	1.123
MIP-2	mip-1(uae1)	12.189
MIP-2	mip-1(uae1)	13.471
MIP-2	mip-1(uae1)	2.887
MIP-2	mip-1(uae1)	1.733
MIP-2	mip-1(uae1)	2.295
MIP-2	mip-1(uae1)	5.604
MIP-2	mip-1(uae1)	12.725
MIP-2	mip-1(uae1)	4.473
MIP-2	mip-1(uae1)	9.727
MIP-2	mip-1(uae1)	2.135
MIP-2	mip-1(uae1)	10.021
MIP-2	mip-1(uae1)	10.115
MIP-2	mip-1(uae1)	9.68
MIP-2	mip-1(uae1)	1.096
MIP-2	mip-1(uae1)	3.996
MIP-2	mip-1(uae1)	1.588
MIP-2	mip-1(uae1)	1.723
MIP-2	mip-1(uae1)	9.357
MIP-2	mip-1(uae1)	4.879
MIP-2	mip-1(uae1)	5.249
MIP-2	mip-1(uae1)	3.121
MIP-2	mip-1(uae1)	4.724
MIP-2	mip-1(uae1)	1.292
MIP-2	mip-1(uae1)	7.891
MIP-2	mip-1(uae1)	2.846
MIP-2	mip-1(uae1)	2.215
MIP-2	mip-1(uae1)	10.335
MIP-2	mip-1(uae1)	7.527
MIP-2	mip-1(uae1)	6.727
MIP-2	mip-1(uae1)	2.343
MIP-2	mip-1(uae1)	2.092
MIP-2	mip-1(uae1)	8.572
MIP-2	mip-1(uae1)	14.084
MIP-2	mip-1(uae1)	13.276
MIP-2	mip-1(uae1)	3.572
MIP-2	mip-1(uae1)	8.216
MIP-2	mip-1(uae1)	2.542
MIP-2	mip-1(uae1)	7.423
MIP-2	mip-1(uae1)	1.483
MIP-2	mip-1(uae1)	5.743
MIP-2	mip-1(uae1)	2.034
MIP-1	WT	7.281
MIP-1	WT	3.859
MIP-1	WT	1.578
MIP-1	WT	2.784
MIP-1	WT	3.32
MIP-1	WT	2.114
MIP-1	WT	6.692
MIP-1	WT	1.525
MIP-1	WT	7.586
MIP-1	WT	4.088
MIP-1	WT	2.325
MIP-1	WT	4.912
MIP-1	WT	5.741
MIP-1	WT	11.223
MIP-1	WT	8.29
MIP-1	WT	7.998
MIP-1	WT	4.304
MIP-1	WT	3.792
MIP-1	WT	1.963
MIP-1	WT	2.351
MIP-1	WT	3.092
MIP-1	WT	3.223
MIP-1	WT	3.166
MIP-1	WT	6.786
MIP-1	WT	1.627
MIP-1	WT	3.486
MIP-1	WT	11.751
MIP-1	WT	1.28
MIP-1	WT	4.307
MIP-1	WT	3.906
MIP-1	WT	1.214
MIP-1	WT	8.136
MIP-1	WT	7.08
MIP-1	WT	1.105
MIP-1	WT	1.087
MIP-1	WT	6.729
MIP-1	WT	3.65
MIP-1	WT	1.842
MIP-1	WT	1.087
MIP-1	WT	6.418
MIP-1	WT	1.599
MIP-1	WT	1.156
MIP-1	WT	7.219
MIP-1	WT	4.485
MIP-1	WT	1.421
MIP-1	WT	4.804
MIP-1	WT	2.052
MIP-1	WT	3.081
MIP-1	WT	2.104
MIP-1	WT	1.902
MIP-1	WT	1.793
MIP-1	WT	1.075
MIP-1	WT	8.25
MIP-1	WT	3.111
MIP-1	WT	2.403
MIP-1	WT	1.647
MIP-1	WT	1.502
MIP-1	WT	1.561
MIP-1	WT	1.318
MIP-1	WT	1.312
MIP-1	WT	1.17
MIP-1	WT	1.572
MIP-1	WT	3.598
MIP-1	WT	6.236
MIP-1	WT	4.896
MIP-1	WT	2.651
MIP-1	WT	1.469
MIP-1	WT	1.458
MIP-1	WT	4.194
MIP-1	WT	5.601
MIP-1	WT	2.357
MIP-1	WT	1.932
MIP-1	WT	1.135
MIP-1	WT	2.334
MIP-1	WT	4.404
MIP-1	WT	13.427
MIP-1	WT	1.253
MIP-1	WT	1.096
MIP-1	WT	2.745
MIP-1	WT	2.699
MIP-1	WT	1.52
MIP-1	WT	2.364
MIP-1	WT	2.625
MIP-1	WT	1.165
MIP-1	WT	2.171
MIP-1	WT	7.21
MIP-1	WT	3.012
MIP-1	WT	10.122
MIP-1	WT	1.437
MIP-1	WT	5.592
MIP-1	WT	4.038
MIP-1	WT	2.358
MIP-1	WT	8.321
MIP-1	WT	1.01
MIP-1	WT	5.168
MIP-1	WT	1.218
MIP-1	WT	1.741
MIP-1	WT	5.387
MIP-1	WT	4.063
MIP-1	WT	2.215
MIP-1	WT	2.085
MIP-1	WT	6.336
MIP-1	WT	3.958
MIP-1	WT	4.09
MIP-1	WT	1.804
MIP-1	WT	3.009
MIP-1	WT	4.541
MIP-1	WT	12.133
MIP-1	WT	2.023
MIP-1	WT	3.474
MIP-1	WT	1.294
MIP-1	WT	1.566
MIP-1	WT	1.887
MIP-1	WT	3.862
MIP-1	WT	4.241
MIP-1	WT	1.368
MIP-1	WT	6.082
MIP-1	WT	3.806
MIP-1	WT	2.754
MIP-1	WT	4.863
MIP-1	WT	2.278
MIP-1	WT	3.321
MIP-1	WT	4.605
MIP-1	WT	3.21
MIP-1	WT	3.896
MIP-1	WT	4.204
MIP-1	WT	12.514
MIP-1	WT	2.346
MIP-1	WT	4.804
MIP-1	WT	4.345
MIP-1	WT	3.406
MIP-1	WT	2.346
MIP-1	WT	3.099
MIP-1	WT	4.044
MIP-1	WT	1.875
MIP-1	WT	3.388
MIP-1	WT	3.211
MIP-1	WT	2.483
MIP-1	WT	3.185
MIP-1	WT	5.397
MIP-1	WT	3.463
MIP-1	WT	14.7
MIP-1	WT	1.644
MIP-1	WT	9.879
MIP-1	WT	1.517
MIP-1	WT	1.153
MIP-1	WT	3.581
MIP-1	WT	1.14
MIP-1	WT	1.321
MIP-1	WT	10.719
MIP-1	WT	1.8
MIP-1	WT	1.484
MIP-1	WT	1.09
MIP-1	WT	12.022
MIP-1	WT	1.575
MIP-1	WT	6.531
MIP-1	WT	4.111
MIP-1	WT	2.876
MIP-1	WT	9.677
MIP-1	WT	1.904
MIP-1	WT	2.36
MIP-1	WT	2.755
MIP-1	WT	4.751
MIP-1	WT	1.39
MIP-1	WT	2.067
MIP-1	WT	5.648
MIP-1	WT	11.323
MIP-1	WT	1.339
MIP-1	WT	1.861
MIP-1	WT	4.281
MIP-1	WT	1.079
MIP-1	WT	11.049
MIP-1	WT	6.735
MIP-1	WT	2.2
MIP-1	WT	1.034
MIP-1	WT	6.508
MIP-1	WT	6.357
MIP-1	WT	1.072
MIP-1	WT	1.623
MIP-1	WT	3.904
MIP-1	WT	7.834
MIP-1	WT	6.022
MIP-1	WT	9.547
MIP-1	WT	2.708
MIP-1	WT	3.314
MIP-1	WT	3.432
MIP-1	WT	5.077
MIP-1	WT	1.244
MIP-1	WT	4.084
MIP-1	WT	2.308
MIP-1	WT	2.627
MIP-1	WT	1.27
MIP-1	WT	3.127
MIP-1	WT	1.3
MIP-1	WT	11.419
MIP-1	WT	3.288
MIP-1	WT	6.04
MIP-1	WT	4.854
MIP-1	WT	8.057
MIP-1	WT	1.389
MIP-1	WT	14.981
MIP-1	WT	1.472
MIP-1	WT	6.718
MIP-1	WT	3.918
MIP-1	WT	5.151
MIP-1	WT	7.144
MIP-1	WT	2.829
MIP-1	WT	11.785
MIP-1	WT	8.954
MIP-1	WT	3.478
MIP-1	WT	1.119
MIP-1	WT	7.13
MIP-1	WT	1.652
MIP-1	WT	6.159
MIP-1	WT	1.815
MIP-1	WT	1.421
MIP-1	WT	2.606
MIP-1	WT	1.191
MIP-1	WT	1.475
MIP-1	WT	1.386
MIP-1	WT	1.831
MIP-1	WT	5.31
MIP-1	WT	4.34
MIP-1	WT	4.828
MIP-1	WT	9.673
MIP-1	WT	4.067
MIP-1	WT	8.299
MIP-1	WT	3.714
MIP-1	WT	1.742
MIP-1	WT	1.846
MIP-1	WT	1.561
MIP-1	WT	2.53
MIP-1	WT	4.532
MIP-1	WT	2.429
MIP-1	WT	2.559
MIP-1	WT	1.611
MIP-1	WT	1.869
MIP-1	WT	6.022
MIP-1	WT	3.373
MIP-1	WT	1.351
MIP-1	WT	1.599
MIP-1	WT	4.908
MIP-1	WT	1.322
MIP-1	mip-2(uae2)	12.894
MIP-1	mip-2(uae2)	1.259
MIP-1	mip-2(uae2)	4.74
MIP-1	mip-2(uae2)	2.357
MIP-1	mip-2(uae2)	7.628
MIP-1	mip-2(uae2)	2.649
MIP-1	mip-2(uae2)	2.186
MIP-1	mip-2(uae2)	1.685
MIP-1	mip-2(uae2)	1.027
MIP-1	mip-2(uae2)	3.949
MIP-1	mip-2(uae2)	1.319
MIP-1	mip-2(uae2)	1.544
MIP-1	mip-2(uae2)	1.999
MIP-1	mip-2(uae2)	5.661
MIP-1	mip-2(uae2)	1.409
MIP-1	mip-2(uae2)	1.617
MIP-1	mip-2(uae2)	2.6
MIP-1	mip-2(uae2)	2.218
MIP-1	mip-2(uae2)	6.23
MIP-1	mip-2(uae2)	1.185
MIP-1	mip-2(uae2)	6.39
MIP-1	mip-2(uae2)	1.073
MIP-1	mip-2(uae2)	2.077
MIP-1	mip-2(uae2)	4.836
MIP-1	mip-2(uae2)	7.733
MIP-1	mip-2(uae2)	1.226
MIP-1	mip-2(uae2)	4.398
MIP-1	mip-2(uae2)	2.702
MIP-1	mip-2(uae2)	1.031
MIP-1	mip-2(uae2)	1.2
MIP-1	mip-2(uae2)	2.308
MIP-1	mip-2(uae2)	10.654
MIP-1	mip-2(uae2)	1.614
MIP-1	mip-2(uae2)	1.537
MIP-1	mip-2(uae2)	1.249
MIP-1	mip-2(uae2)	1.102
MIP-1	mip-2(uae2)	2.628
MIP-1	mip-2(uae2)	1.863
MIP-1	mip-2(uae2)	5.266
MIP-1	mip-2(uae2)	1.878
MIP-1	mip-2(uae2)	7.589
MIP-1	mip-2(uae2)	2.939
MIP-1	mip-2(uae2)	1.833
MIP-1	mip-2(uae2)	1.338
MIP-1	mip-2(uae2)	1.985
MIP-1	mip-2(uae2)	1.457
MIP-1	mip-2(uae2)	2.693
MIP-1	mip-2(uae2)	1.504
MIP-1	mip-2(uae2)	6.191
MIP-1	mip-2(uae2)	2.2
MIP-1	mip-2(uae2)	1.088
MIP-1	mip-2(uae2)	1.12
MIP-1	mip-2(uae2)	1.214
MIP-1	mip-2(uae2)	4.073
MIP-1	mip-2(uae2)	2.547
MIP-1	mip-2(uae2)	2.354
MIP-1	mip-2(uae2)	5.704
MIP-1	mip-2(uae2)	5.171
MIP-1	mip-2(uae2)	1.369
MIP-1	mip-2(uae2)	1.486
MIP-1	mip-2(uae2)	1.981
MIP-1	mip-2(uae2)	1.144
MIP-1	mip-2(uae2)	1.087
MIP-1	mip-2(uae2)	1.375
MIP-1	mip-2(uae2)	6.615
MIP-1	mip-2(uae2)	3.863
MIP-1	mip-2(uae2)	1.996
MIP-1	mip-2(uae2)	14.168
MIP-1	mip-2(uae2)	2.204
MIP-1	mip-2(uae2)	2.726
MIP-1	mip-2(uae2)	3.515
MIP-1	mip-2(uae2)	2.343
MIP-1	mip-2(uae2)	1.072
MIP-1	mip-2(uae2)	2.405
MIP-1	mip-2(uae2)	13.67
MIP-1	mip-2(uae2)	1.614
MIP-1	mip-2(uae2)	2.77
MIP-1	mip-2(uae2)	1.618
MIP-1	mip-2(uae2)	2.711
MIP-1	mip-2(uae2)	1.421
MIP-1	mip-2(uae2)	3.896
MIP-1	mip-2(uae2)	1.395
MIP-1	mip-2(uae2)	8.696
MIP-1	mip-2(uae2)	1.36
MIP-1	mip-2(uae2)	1.14
MIP-1	mip-2(uae2)	2.372
MIP-1	mip-2(uae2)	1.695
MIP-1	mip-2(uae2)	1.045
MIP-1	mip-2(uae2)	3.957
MIP-1	mip-2(uae2)	2.15
MIP-1	mip-2(uae2)	1.019
MIP-1	mip-2(uae2)	5.631
MIP-1	mip-2(uae2)	5.858
MIP-1	mip-2(uae2)	1.242
MIP-1	mip-2(uae2)	2.186
MIP-1	mip-2(uae2)	1.095
MIP-1	mip-2(uae2)	1.018
MIP-1	mip-2(uae2)	2.358
MIP-1	mip-2(uae2)	2.248
MIP-1	mip-2(uae2)	1.49
MIP-1	mip-2(uae2)	1.883
MIP-1	mip-2(uae2)	1.694
MIP-1	mip-2(uae2)	2.612
MIP-1	mip-2(uae2)	1.117
MIP-1	mip-2(uae2)	4.546
MIP-1	mip-2(uae2)	4.307
MIP-1	mip-2(uae2)	11.625
MIP-1	mip-2(uae2)	2.935
MIP-1	mip-2(uae2)	1.016
MIP-1	mip-2(uae2)	2.376
MIP-1	mip-2(uae2)	1.818
MIP-1	mip-2(uae2)	2.227
MIP-1	mip-2(uae2)	2.046
MIP-1	mip-2(uae2)	1.04
MIP-1	mip-2(uae2)	1.273
MIP-1	mip-2(uae2)	3.598
MIP-1	mip-2(uae2)	3.178
MIP-1	mip-2(uae2)	2.346
MIP-1	mip-2(uae2)	2.246
MIP-1	mip-2(uae2)	4.023
MIP-1	mip-2(uae2)	1.23
MIP-1	mip-2(uae2)	2.592
MIP-1	mip-2(uae2)	2.168
MIP-1	mip-2(uae2)	1.792
MIP-1	mip-2(uae2)	4.5
MIP-1	mip-2(uae2)	5.814
MIP-1	mip-2(uae2)	2.074
MIP-1	mip-2(uae2)	9.398
MIP-1	mip-2(uae2)	2.357
MIP-1	mip-2(uae2)	3.761
MIP-1	mip-2(uae2)	2.914
MIP-1	mip-2(uae2)	1.624
MIP-1	mip-2(uae2)	1.762
MIP-1	mip-2(uae2)	2.206
MIP-1	mip-2(uae2)	5.936
MIP-1	mip-2(uae2)	1.167
MIP-1	mip-2(uae2)	4.38
MIP-1	mip-2(uae2)	1.572
MIP-1	mip-2(uae2)	2.425
MIP-1	mip-2(uae2)	1.498
MIP-1	mip-2(uae2)	3.669
MIP-1	mip-2(uae2)	4.247
MIP-1	mip-2(uae2)	6.791
MIP-1	mip-2(uae2)	4.085
MIP-1	mip-2(uae2)	3.646
MIP-1	mip-2(uae2)	5.627
MIP-1	mip-2(uae2)	1.362
MIP-1	mip-2(uae2)	1.529
MIP-1	mip-2(uae2)	1.685
MIP-1	mip-2(uae2)	3.231
MIP-1	mip-2(uae2)	2.663
MIP-1	mip-2(uae2)	9.475
MIP-1	mip-2(uae2)	1.335
MIP-1	mip-2(uae2)	1.082
MIP-1	mip-2(uae2)	1.996
MIP-1	mip-2(uae2)	2.429
MIP-1	mip-2(uae2)	1.605
MIP-1	mip-2(uae2)	1.048
MIP-1	mip-2(uae2)	1.238
