# Supplementary material for: Novel LOTUS-domain proteins are organizational hubs that recruit C. elegans Vasa to germ granules
Source: eLife. 2021 Jul 5;10:e60833. doi: 10.7554/eLife.60833 (PMC8331183; doi:10.7554/eLife.60833)
Supplement: Figure 9—source data 1. [file elife-60833-fig9-data1.xlsx]

## Sheet: Figure_9B
Figure 9B. Quantification of MIP-1::GFP and MIP-2::mCherry granule area and distance from nuclei in -3, -4 and -5 oocytes (10 gonads per genotype). Units: Area, um^2; Distance, um.
Strain	Protein	Genetic_Background	Germline	Oocyte	Area	Distance
GKC564	MIP-1	WT	1	minus3	0.785398	14.4396
GKC564	MIP-1	WT	1	minus3	0.567179	10.1334
GKC564	MIP-1	WT	1	minus3	0.813018	7.99045
GKC564	MIP-1	WT	1	minus3	2.72427	6.36055
GKC564	MIP-1	WT	1	minus3	0.376364	7.29803
GKC564	MIP-1	WT	1	minus3	0.45403	6.7291
GKC564	MIP-1	WT	1	minus3	0.317548	7.53218
GKC564	MIP-1	WT	1	minus3	3.2882	4.06969
GKC564	MIP-1	WT	1	minus3	1.51483	3.61799
GKC564	MIP-1	WT	1	minus3	1.14407	5.28173
GKC564	MIP-1	WT	1	minus3	0.430888	3.38815
GKC564	MIP-1	WT	1	minus3	0.459723	2.81167
GKC564	MIP-1	WT	1	minus3	3.04822	0.520938
GKC564	MIP-1	WT	1	minus3	0.729761	1.22716
GKC564	MIP-1	WT	1	minus3	1.01822	0.032947
GKC564	MIP-1	WT	1	minus3	1.96444	-0.648402
GKC564	MIP-1	WT	1	minus3	0.357302	0.197682
GKC564	MIP-1	WT	1	minus3	0.74767	-0.575395
GKC564	MIP-1	WT	1	minus3	0.641444	0.656465
GKC564	MIP-1	WT	1	minus3	3.04381	0.819916
GKC564	MIP-1	WT	1	minus3	0.765367	-0.944786
GKC564	MIP-1	WT	1	minus3	0.331063	4.94534
GKC564	MIP-1	WT	1	minus3	4.39636	10.9134
GKC564	MIP-1	WT	1	minus3	1.85868	7.42467
GKC564	MIP-1	WT	1	minus3	1.43241	8.73477
GKC564	MIP-1	WT	1	minus3	1.15842	4.40977
GKC564	MIP-1	WT	1	minus3	1.01058	6.72226
GKC564	MIP-1	WT	1	minus3	0.504074	2.84478
GKC564	MIP-1	WT	1	minus3	1.11146	0.91127
GKC564	MIP-1	WT	1	minus3	1.74107	-0.164735
GKC564	MIP-1	WT	1	minus3	0.577353	0.78106
GKC564	MIP-1	WT	1	minus3	1.10781	1.89667
GKC564	MIP-1	WT	1	minus3	2.20177	2.0586
GKC564	MIP-1	WT	1	minus3	1.58897	1.44404
GKC564	MIP-1	WT	1	minus3	1.73231	0.927797
GKC564	MIP-1	WT	1	minus3	0.842625	1.41019
GKC564	MIP-1	WT	1	minus3	0.413117	0.385635
GKC564	MIP-1	WT	1	minus3	0.607354	-0.868145
GKC564	MIP-1	WT	1	minus3	2.33715	2.08227
GKC564	MIP-1	WT	1	minus3	0.785398	1.42017
GKC564	MIP-1	WT	1	minus3	0.964109	-0.294687
GKC564	MIP-1	WT	1	minus3	1.28719	0.032947
GKC564	MIP-1	WT	1	minus3	0.388807	11.2888
GKC564	MIP-1	WT	1	minus3	2.33211	4.9739
GKC564	MIP-1	WT	1	minus3	2.20695	4.22914
GKC564	MIP-1	WT	1	minus3	0.729761	6.7088
GKC564	MIP-1	WT	1	minus3	0.363711	1.43848
GKC564	MIP-1	WT	1	minus3	1.10415	0.443257
GKC564	MIP-1	WT	1	minus3	0.442535	-0.118792
GKC564	MIP-1	WT	1	minus3	0.394954	0.980863
GKC564	MIP-1	WT	1	minus3	2.34721	0.400818
GKC564	MIP-1	WT	1	minus3	1.51483	-0.135844
GKC564	MIP-1	WT	1	minus3	0.968024	-0.439568
GKC564	MIP-1	WT	1	minus3	1.89239	-0.239858
GKC564	MIP-1	WT	1	minus3	0.582407	0.118792
GKC564	MIP-1	WT	1	minus3	0.674651	0.343977
GKC564	MIP-1	WT	1	minus3	1.16199	1.29474
GKC564	MIP-1	WT	1	minus3	1.1939	0.903078
GKC564	MIP-1	WT	1	minus3	0.520206	2.78909
GKC564	MIP-1	WT	1	minus3	0.425006	11.5638
GKC564	MIP-1	WT	1	minus3	1.87557	5.46475
GKC564	MIP-1	WT	1	minus3	0.577353	1.23901
GKC564	MIP-1	WT	1	minus3	0.81728	2.96279
GKC564	MIP-1	WT	1	minus3	1.42597	1.18391
GKC564	MIP-1	WT	1	minus3	0.756545	4.1993
GKC564	MIP-1	WT	1	minus3	0.21275	3.83363
GKC564	MIP-1	WT	1	minus3	0.607354	3.20784
GKC564	MIP-1	WT	1	minus3	1.34754	3.11827
GKC564	MIP-1	WT	1	minus3	2.10739	2.53023
GKC564	MIP-1	WT	1	minus3	0.546552	3.86323
GKC564	MIP-1	WT	2	minus3	1.2358	7.09263
GKC564	MIP-1	WT	2	minus3	5.0207	2.92426
GKC564	MIP-1	WT	2	minus3	3.26908	4.83627
GKC564	MIP-1	WT	2	minus3	2.52231	3.59816
GKC564	MIP-1	WT	2	minus3	2.43185	3.60057
GKC564	MIP-1	WT	2	minus3	1.76432	1.28714
GKC564	MIP-1	WT	2	minus3	2.8647	6.58996
GKC564	MIP-1	WT	2	minus3	13.0665	2.93486
GKC564	MIP-1	WT	2	minus3	5.91612	0.795729
GKC564	MIP-1	WT	2	minus3	1.81038	0.513918
GKC564	MIP-1	WT	2	minus3	3.35786	1.83419
GKC564	MIP-1	WT	2	minus3	2.48095	-0.772892
GKC564	MIP-1	WT	2	minus3	3.53816	-0.542684
GKC564	MIP-1	WT	2	minus3	2.19398	0.613122
GKC564	MIP-1	WT	2	minus3	4.17328	-1.06569
GKC564	MIP-1	WT	2	minus3	3.86226	0.940756
GKC564	MIP-1	WT	2	minus3	2.03519	6.11305
GKC564	MIP-1	WT	2	minus3	6.61716	-0.283421
GKC564	MIP-1	WT	2	minus3	2.49072	0.283421
GKC564	MIP-1	WT	2	minus3	3.26695	0.931883
GKC564	MIP-1	WT	2	minus3	6.61866	-0.147344
GKC564	MIP-1	WT	2	minus3	2.47607	1.11826
GKC564	MIP-1	WT	2	minus3	1.30746	1.85939
GKC564	MIP-1	WT	2	minus3	2.09677	4.87074
GKC564	MIP-1	WT	2	minus3	1.67928	0.0988411
GKC564	MIP-1	WT	2	minus3	1.30409	0.81039
GKC564	MIP-1	WT	2	minus3	2.75682	4.24352
GKC564	MIP-1	WT	2	minus3	0.90843	1.78675
GKC564	MIP-1	WT	2	minus3	0.879943	1.77914
GKC564	MIP-1	WT	2	minus3	2.17315	0.210964
GKC564	MIP-1	WT	2	minus3	1.03342	0.457715
GKC564	MIP-1	WT	2	minus3	0.765367	0.326159
GKC564	MIP-1	WT	2	minus3	1.36077	0.586605
GKC564	MIP-1	WT	2	minus3	1.51483	0
GKC564	MIP-1	WT	3	minus3	0.448301	5.31521
GKC564	MIP-1	WT	3	minus3	0.430889	5.0625
GKC564	MIP-1	WT	3	minus3	0.337718	4.10651
GKC564	MIP-1	WT	3	minus3	0.382611	6.3182
GKC564	MIP-1	WT	3	minus3	0.310682	4.78176
GKC564	MIP-1	WT	3	minus3	0.514857	3.1279
GKC564	MIP-1	WT	3	minus3	0.357303	5.44385
GKC564	MIP-1	WT	3	minus3	0.73426	10.551
GKC564	MIP-1	WT	3	minus3	1.57367	11.3167
GKC564	MIP-1	WT	3	minus3	1.05226	4.16361
GKC564	MIP-1	WT	3	minus3	1.09681	5.4879
GKC564	MIP-1	WT	3	minus3	0.370065	3.76881
GKC564	MIP-1	WT	3	minus3	0.688635	4.05651
GKC564	MIP-1	WT	3	minus3	0.61719	7.75164
GKC564	MIP-1	WT	3	minus3	0.419083	2.93999
GKC564	MIP-1	WT	3	minus3	0.546553	4.95095
GKC564	MIP-1	WT	3	minus3	0.324341	6.28426
GKC564	MIP-1	WT	3	minus3	0.436731	1.07985
GKC564	MIP-1	WT	3	minus3	0.317548	6.35435
GKC564	MIP-1	WT	3	minus3	0.363712	4.01071
GKC564	MIP-1	WT	3	minus3	0.237096	1.40604
GKC564	MIP-1	WT	3	minus3	1.33758	1.26116
GKC564	MIP-1	WT	3	minus3	0.425006	4.30973
GKC564	MIP-1	WT	3	minus3	0.282413	3.07288
GKC564	MIP-1	WT	3	minus3	1.72646	6.08243
GKC564	MIP-1	WT	3	minus3	2.97058	0.513918
GKC564	MIP-1	WT	3	minus3	4.9535	-0.475169
GKC564	MIP-1	WT	3	minus3	0.357303	0.769157
GKC564	MIP-1	WT	3	minus3	0.646241	5.13316
GKC564	MIP-1	WT	3	minus3	1.11511	-0.936709
GKC564	MIP-1	WT	3	minus3	3.23921	-1.43054
GKC564	MIP-1	WT	3	minus3	3.23921	3.39294
GKC564	MIP-1	WT	3	minus3	0.370065	4.31728
GKC564	MIP-1	WT	3	minus3	0.602406	3.5364
GKC564	MIP-1	WT	3	minus3	0.817281	-0.167998
GKC564	MIP-1	WT	3	minus3	0.83422	-0.678421
GKC564	MIP-1	WT	3	minus3	0.289609	0.177425
GKC564	MIP-1	WT	3	minus3	0.303739	1.86618
GKC564	MIP-1	WT	3	minus3	1.31754	0.468266
GKC564	MIP-1	WT	3	minus3	0.72525	0.131788
GKC564	MIP-1	WT	3	minus3	6.66495	0
GKC564	MIP-1	WT	3	minus3	4.30041	-0.629453
GKC564	MIP-1	WT	3	minus3	4.58702	-0.200409
GKC564	MIP-1	WT	3	minus3	2.95493	-1.28126
GKC564	MIP-1	WT	3	minus3	1.6644	1.32527
GKC564	MIP-1	WT	3	minus3	0.800165	-0.0329471
GKC564	MIP-1	WT	3	minus3	5.88603	1.94499
GKC564	MIP-1	WT	3	minus3	1.11875	1.25025
GKC564	MIP-1	WT	3	minus3	0.520206	-0.303757
GKC564	MIP-1	WT	3	minus3	0.592449	-0.647307
GKC564	MIP-1	WT	3	minus3	0.607354	-0.566843
GKC564	MIP-1	WT	3	minus3	0.612282	-0.991869
GKC564	MIP-1	WT	3	minus3	0.655779	-0.718296
GKC564	MIP-1	WT	3	minus3	0.337718	6.71449
GKC564	MIP-1	WT	3	minus3	0.459723	0.729314
GKC564	MIP-1	WT	3	minus3	0.908431	-0.512536
GKC564	MIP-1	WT	3	minus3	1.2838	0
GKC564	MIP-1	WT	3	minus3	1.35416	-0.940756
GKC564	MIP-1	WT	3	minus3	0.697878	-1.17843
GKC564	MIP-1	WT	3	minus3	2.56574	-0.601227
GKC564	MIP-1	WT	3	minus3	1.62237	-0.232971
GKC564	MIP-1	WT	3	minus3	0.716184	-0.809256
GKC564	MIP-1	WT	3	minus3	1.41952	6.4816
GKC564	MIP-1	WT	3	minus3	1.15484	-0.375654
GKC564	MIP-1	WT	3	minus3	1.20444	-0.955465
GKC564	MIP-1	WT	4	minus3	0.73426	17.8985
GKC564	MIP-1	WT	4	minus3	2.66332	10.9021
GKC564	MIP-1	WT	4	minus3	0.602406	15.387
GKC564	MIP-1	WT	4	minus3	0.296716	0.598791
GKC564	MIP-1	WT	4	minus3	3.43512	0.803872
GKC564	MIP-1	WT	4	minus3	4.89106	-1.08925
GKC564	MIP-1	WT	4	minus3	0.92451	-0.705098
GKC564	MIP-1	WT	4	minus3	0.382611	9.57698
GKC564	MIP-1	WT	4	minus3	1.96719	9.32648
GKC564	MIP-1	WT	4	minus3	0.229125	12.2737
GKC564	MIP-1	WT	4	minus3	1.59811	12.1395
GKC564	MIP-1	WT	4	minus3	0.536092	6.05315
GKC564	MIP-1	WT	4	minus3	0.303739	1.65426
GKC564	MIP-1	WT	4	minus3	0.525528	1.00205
GKC564	MIP-1	WT	4	minus3	0.357303	1.02946
GKC564	MIP-1	WT	4	minus3	0.382611	0.762286
GKC564	MIP-1	WT	4	minus3	0.337718	4.94974
GKC564	MIP-1	WT	4	minus3	0.331064	0.760642
GKC564	MIP-1	WT	4	minus3	0.77414	7.91897
GKC564	MIP-1	WT	4	minus3	0.419083	5.12758
GKC564	MIP-1	WT	4	minus3	1.25648	5.17783
GKC564	MIP-1	WT	4	minus3	0.317548	-0.530547
GKC564	MIP-1	WT	4	minus3	0.476596	-0.776396
GKC564	MIP-1	WT	4	minus3	0.310682	-0.648402
GKC564	MIP-1	WT	4	minus3	2.29924	0.486458
GKC564	MIP-1	WT	4	minus3	1.21494	4.23908
GKC564	MIP-1	WT	4	minus3	0.88813	-1.26888
GKC564	MIP-1	WT	4	minus3	1.17623	0.551612
GKC564	MIP-1	WT	4	minus3	0.310682	1.00799
GKC564	MIP-1	WT	4	minus3	2.0271	8.25192
GKC564	MIP-1	WT	4	minus3	1.37065	8.61395
GKC564	MIP-1	WT	4	minus3	1.34422	8.94475
GKC564	MIP-1	WT	4	minus3	1.01441	8.62696
GKC564	MIP-1	WT	4	minus3	2.55612	4.50134
GKC564	MIP-1	WT	4	minus3	0.221013	3.82062
GKC564	MIP-1	WT	4	minus3	2.20436	4.78757
GKC564	MIP-1	WT	4	minus3	0.168665	7.41794
GKC564	MIP-1	WT	4	minus3	2.28399	1.63356
GKC564	MIP-1	WT	4	minus3	1.64945	1.57262
GKC564	MIP-1	WT	4	minus3	1.16199	16.4818
GKC564	MIP-1	WT	4	minus3	0.56718	13.9022
GKC564	MIP-1	WT	4	minus3	0.747671	10.1525
GKC564	MIP-1	WT	4	minus3	0.787206	3.36646
GKC564	MIP-1	WT	4	minus3	0.778508	2.81718
GKC564	MIP-1	WT	4	minus3	0.344308	1.81008
GKC564	MIP-1	WT	4	minus3	0.357303	2.57814
GKC564	MIP-1	WT	4	minus3	0.275125	1.43045
GKC564	MIP-1	WT	4	minus3	0.21275	2.77715
GKC564	MIP-1	WT	4	minus3	0.482154	3.03959
GKC564	MIP-1	WT	4	minus3	0.442535	2.13402
GKC564	MIP-1	WT	4	minus3	0.296716	1.38036
GKC564	MIP-1	WT	4	minus3	0.665249	5.44985
GKC564	MIP-1	WT	4	minus3	0.968025	3.728
GKC564	MIP-1	WT	5	minus3	0.430888	13.1953
GKC564	MIP-1	WT	5	minus3	0.267738	12.2099
GKC564	MIP-1	WT	5	minus3	0.324341	8.59439
GKC564	MIP-1	WT	5	minus3	0.729761	8.00808
GKC564	MIP-1	WT	5	minus3	1.53042	7.29297
GKC564	MIP-1	WT	5	minus3	2.30178	4.77576
GKC564	MIP-1	WT	5	minus3	0.514857	1.91723
GKC564	MIP-1	WT	5	minus3	1.77878	1.50273
GKC564	MIP-1	WT	5	minus3	0.651018	2.92288
GKC564	MIP-1	WT	5	minus3	0.520206	0.67143
GKC564	MIP-1	WT	5	minus3	1.34422	7.49364
GKC564	MIP-1	WT	5	minus3	0.760963	6.46125
GKC564	MIP-1	WT	5	minus3	1.4834	7.66879
GKC564	MIP-1	WT	5	minus3	0.413117	3.74652
GKC564	MIP-1	WT	5	minus3	0.442535	8.80141
GKC564	MIP-1	WT	5	minus3	0.791537	5.42104
GKC564	MIP-1	WT	5	minus3	1.20795	5.23036
GKC564	MIP-1	WT	5	minus3	0.734259	6.11838
GKC564	MIP-1	WT	5	minus3	1.01441	7.39174
GKC564	MIP-1	WT	5	minus3	5.42979	2.19421
GKC564	MIP-1	WT	5	minus3	4.69774	-0.50861
GKC564	MIP-1	WT	5	minus3	7.13088	-1.56292
GKC564	MIP-1	WT	5	minus3	3.71996	6.69338
GKC564	MIP-1	WT	5	minus3	1.7903	0.668189
GKC564	MIP-1	WT	5	minus3	1.18331	-0.429577
GKC564	MIP-1	WT	5	minus3	3.52997	0.647307
GKC564	MIP-1	WT	5	minus3	5.35522	1.06353
GKC564	MIP-1	WT	5	minus3	2.46872	-0.208375
GKC564	MIP-1	WT	5	minus3	3.72794	-0.752973
GKC564	MIP-1	WT	5	minus3	1.33091	0.428311
GKC564	MIP-1	WT	5	minus3	2.99064	10.0154
GKC564	MIP-1	WT	5	minus3	1.42919	3.56808
GKC564	MIP-1	WT	5	minus3	2.93025	7.60185
GKC564	MIP-1	WT	5	minus3	1.40981	5.05695
GKC564	MIP-1	WT	5	minus3	1.3903	5.21282
GKC564	MIP-1	WT	5	minus3	1.04851	4.79377
GKC564	MIP-1	WT	5	minus3	4.42385	1.8824
GKC564	MIP-1	WT	5	minus3	2.46382	5.07805
GKC564	MIP-1	WT	5	minus3	2.48095	0.331114
GKC564	MIP-1	WT	5	minus3	1.02963	0.692912
GKC564	MIP-1	WT	5	minus3	1.23233	2.50924
GKC564	MIP-1	WT	5	minus3	1.65244	7.4517
GKC564	MIP-1	WT	5	minus3	2.57294	-0.498579
GKC564	MIP-1	WT	5	minus3	2.02439	3.18673
GKC564	MIP-1	WT	5	minus3	1.37721	2.48882
GKC564	MIP-1	WT	5	minus3	1.11875	2.12305
GKC564	MIP-1	WT	5	minus3	5.68122	3.63484
GKC564	MIP-1	WT	5	minus3	2.80527	13.3812
GKC564	MIP-1	WT	5	minus3	1.31418	3.29459
GKC564	MIP-1	WT	5	minus3	1.01822	-0.384225
GKC564	MIP-1	WT	5	minus3	0.729761	8.26384
GKC564	MIP-1	WT	5	minus3	0.760963	3.48457
GKC564	MIP-1	WT	5	minus3	0.459723	-0.335995
GKC564	MIP-1	WT	5	minus3	1.13097	8.34112
GKC564	MIP-1	WT	5	minus3	0.401054	9.20903
GKC564	MIP-1	WT	5	minus3	0.924509	-0.589374
GKC564	MIP-1	WT	5	minus3	1.13097	1.74937
GKC564	MIP-1	WT	6	minus3	1.13097	9.65915
GKC564	MIP-1	WT	6	minus3	1.13097	9.4381
GKC564	MIP-1	WT	6	minus3	1.13097	9.4373
GKC564	MIP-1	WT	6	minus3	1.13097	9.33454
GKC564	MIP-1	WT	6	minus3	1.13097	9.33454
GKC564	MIP-1	WT	6	minus3	1.13097	4.32232
GKC564	MIP-1	WT	6	minus3	0.18692	2.47299
GKC564	MIP-1	WT	6	minus3	0.394954	2.03173
GKC564	MIP-1	WT	6	minus3	0.572278	4.01318
GKC564	MIP-1	WT	6	minus3	3.65383	3.36806
GKC564	MIP-1	WT	6	minus3	4.5474	6.58519
GKC564	MIP-1	WT	6	minus3	2.25589	8.83854
GKC564	MIP-1	WT	6	minus3	3.25629	0.296523
GKC564	MIP-1	WT	6	minus3	2.19138	6.50746
GKC564	MIP-1	WT	6	minus3	1.47073	0.593961
GKC564	MIP-1	WT	6	minus3	1.0372	0.135844
GKC564	MIP-1	WT	6	minus3	1.01441	-0.164735
GKC564	MIP-1	WT	6	minus3	1.99998	-0.50861
GKC564	MIP-1	WT	6	minus3	0.765367	0.118792
GKC564	MIP-1	WT	6	minus3	1.65544	0.575395
GKC564	MIP-1	WT	6	minus3	2.14171	0.97197
GKC564	MIP-1	WT	6	minus3	1.83887	-0.139782
GKC564	MIP-1	WT	6	minus3	2.21471	1.13608
GKC564	MIP-1	WT	6	minus3	1.17977	0.783142
GKC564	MIP-1	WT	6	minus3	0.90843	0.502915
GKC564	MIP-1	WT	6	minus3	2.88285	1.0171
GKC564	MIP-1	WT	6	minus3	1.38703	-0.368359
GKC564	MIP-1	WT	6	minus3	1.77589	0.983626
GKC564	MIP-1	WT	6	minus3	2.76839	0.489793
GKC564	MIP-1	WT	6	minus3	1.76722	-0.0988411
GKC564	MIP-1	WT	6	minus3	2.28908	1.20575
GKC564	MIP-1	WT	6	minus3	1.50857	-0.412825
GKC564	MIP-1	WT	6	minus3	2.86697	3.17393
GKC564	MIP-1	WT	6	minus3	3.75976	1.25459
GKC564	MIP-1	WT	6	minus3	1.53353	3.2571
GKC564	MIP-1	WT	6	minus3	1.36077	1.48846
GKC564	MIP-1	WT	6	minus3	1.91471	1.28493
GKC564	MIP-1	WT	6	minus3	1.00675	1.77914
GKC564	MIP-1	WT	6	minus3	1.99725	0.131788
GKC564	MIP-1	WT	6	minus3	2.34972	1.21145
GKC564	MIP-1	WT	6	minus3	1.55521	0.692672
GKC564	MIP-1	WT	6	minus3	0.971932	3.66483
GKC564	MIP-1	WT	6	minus3	1.7059	1.26763
GKC564	MIP-1	WT	6	minus3	2.17576	0.210964
GKC564	MIP-1	WT	6	minus3	1.87276	0.687954
GKC564	MIP-1	WT	6	minus3	1.51795	9.47268
GKC564	MIP-1	WT	6	minus3	0.948368	2.29575
GKC564	MIP-1	WT	6	minus3	5.71185	2.3407
GKC564	MIP-1	WT	6	minus3	2.34721	1.07838
GKC564	MIP-1	WT	6	minus3	1.37721	0.731543
GKC564	MIP-1	WT	6	minus3	1.40981	0.965808
GKC564	MIP-1	WT	6	minus3	1.69409	1.14147
GKC564	MIP-1	WT	6	minus3	2.40215	2.56041
GKC564	MIP-1	WT	6	minus3	0.765367	1.35055
GKC564	MIP-1	WT	6	minus3	1.02963	4.13735
GKC564	MIP-1	WT	6	minus3	1.02963	0.221015
GKC564	MIP-1	WT	6	minus3	1.36406	0.916797
GKC564	MIP-1	WT	6	minus3	2.41207	1.23202
GKC564	MIP-1	WT	6	minus3	2.09943	6.12507
GKC564	MIP-1	WT	6	minus3	2.11268	8.35585
GKC564	MIP-1	WT	6	minus3	3.34104	6.84115
GKC564	MIP-1	WT	6	minus3	2.82133	0.878709
GKC564	MIP-1	WT	6	minus3	1.61632	0.565219
GKC564	MIP-1	WT	6	minus3	1.80465	0.67143
GKC564	MIP-1	WT	6	minus3	2.22762	0.621038
GKC564	MIP-1	WT	6	minus3	1.69705	0.83044
GKC564	MIP-1	WT	6	minus3	2.88739	6.47267
GKC564	MIP-1	WT	6	minus3	4.4092	1.31801
GKC564	MIP-1	WT	6	minus3	1.90357	1.73395
GKC564	MIP-1	WT	6	minus3	1.35416	9.12252
GKC564	MIP-1	WT	6	minus3	1.38049	9.53286
GKC564	MIP-1	WT	6	minus3	1.98908	9.27575
GKC564	MIP-1	WT	6	minus3	0.743213	9.83208
GKC564	MIP-1	WT	6	minus3	1.04475	1.21647
GKC564	MIP-1	WT	6	minus3	1.19038	0.640824
GKC564	MIP-1	WT	6	minus3	1.05601	0.505398
GKC564	MIP-1	WT	6	minus3	0.884041	-0.0736718
GKC564	MIP-1	WT	6	minus3	1.04851	0.118792
GKC564	MIP-1	WT	6	minus3	1.36736	0.596066
GKC564	MIP-1	WT	6	minus3	1.80752	0.72656
GKC564	MIP-1	WT	6	minus3	2.85332	1.00217
GKC564	MIP-1	WT	6	minus3	0.76976	8.66562
GKC564	MIP-1	WT	6	minus3	5.33025	4.74869
GKC564	MIP-1	WT	6	minus3	0.944413	1.25472
GKC564	MIP-1	WT	6	minus3	4.95868	2.6711
GKC564	MIP-1	WT	6	minus3	1.04475	1.15372
GKC564	MIP-1	WT	6	minus3	1.30746	0.559428
GKC564	MIP-1	WT	6	minus3	2.32202	2.67465
GKC564	MIP-1	WT	6	minus3	1.87557	1.04719
GKC564	MIP-1	WT	6	minus3	0.991351	1.16868
GKC564	MIP-1	WT	6	minus3	4.38167	2.09801
GKC564	MIP-1	WT	6	minus3	3.12706	7.05582
GKC564	MIP-1	WT	6	minus3	3.30516	7.20343
GKC564	MIP-1	WT	7	minus3	0.337718	2.48007
GKC564	MIP-1	WT	7	minus3	0.310682	9.19136
GKC564	MIP-1	WT	7	minus3	2.38723	0.907873
GKC564	MIP-1	WT	7	minus3	1.29058	0.494206
GKC564	MIP-1	WT	7	minus3	1.77301	-0.937867
GKC564	MIP-1	WT	7	minus3	2.00541	-0.84341
GKC564	MIP-1	WT	7	minus3	5.05841	-0.568754
GKC564	MIP-1	WT	7	minus3	0.791537	-0.407532
GKC564	MIP-1	WT	7	minus3	4.70307	1.3315
GKC564	MIP-1	WT	7	minus3	1.90636	-0.505398
GKC564	MIP-1	WT	7	minus3	2.01627	-0.559428
GKC564	MIP-1	WT	7	minus3	1.26676	-1.14668
GKC564	MIP-1	WT	7	minus3	0.674651	-0.77127
GKC564	MIP-1	WT	7	minus3	0.504074	-0.692672
GKC564	MIP-1	WT	7	minus3	1.63744	-0.428311
GKC564	MIP-1	WT	7	minus3	2.05403	-0.0658941
GKC564	MIP-1	WT	7	minus3	2.05672	1.62757
GKC564	MIP-1	WT	7	minus3	0.476596	0.709936
GKC564	MIP-1	WT	7	minus3	2.60165	-1.15748
GKC564	MIP-1	WT	7	minus3	1.69409	-1.0108
GKC564	MIP-1	WT	7	minus3	1.83319	-0.518125
GKC564	MIP-1	WT	7	minus3	4.26321	-0.767961
GKC564	MIP-1	WT	7	minus3	2.19917	-1.02258
GKC564	MIP-1	WT	7	minus3	2.79608	-0.439568
GKC564	MIP-1	WT	7	minus3	3.74188	0.47173
GKC564	MIP-1	WT	7	minus3	0.932496	-0.730286
GKC564	MIP-1	WT	7	minus3	1.98362	-0.742082
GKC564	MIP-1	WT	7	minus3	1.24961	-1.50145
GKC564	MIP-1	WT	7	minus3	1.09681	-0.312563
GKC564	MIP-1	WT	7	minus3	1.55521	-1.01833
GKC564	MIP-1	WT	7	minus3	0.859311	-0.0658941
GKC564	MIP-1	WT	7	minus3	0.716184	2.00171
GKC564	MIP-1	WT	7	minus3	0.493175	9.0644
GKC564	MIP-1	WT	7	minus3	2.38972	9.76483
GKC564	MIP-1	WT	7	minus3	1.65842	9.57441
GKC564	MIP-1	WT	7	minus3	2.86924	0.375654
GKC564	MIP-1	WT	7	minus3	2.28399	-0.271688
GKC564	MIP-1	WT	7	minus3	3.2135	-0.698912
GKC564	MIP-1	WT	7	minus3	0.683989	-1.03367
GKC564	MIP-1	WT	7	minus3	1.32423	-0.817928
GKC564	MIP-1	WT	7	minus3	0.752114	0.271688
GKC564	MIP-1	WT	7	minus3	1.45163	-0.0658941
GKC564	MIP-1	WT	7	minus3	2.81216	-1.09235
GKC564	MIP-1	WT	7	minus3	1.16912	-0.829786
GKC564	MIP-1	WT	7	minus3	3.17691	-1.11204
GKC564	MIP-1	WT	7	minus3	2.51747	-1.28334
GKC564	MIP-1	WT	7	minus3	2.15221	-1.29931
GKC564	MIP-1	WT	7	minus3	2.81216	0.719574
GKC564	MIP-1	WT	7	minus3	3.9808	-0.79094
GKC564	MIP-1	WT	7	minus3	3.55859	-0.104188
GKC564	MIP-1	WT	7	minus3	1.55521	-0.568754
GKC564	MIP-1	WT	7	minus3	1.13687	-1.09334
GKC564	MIP-1	WT	7	minus3	2.95717	-1.02625
GKC564	MIP-1	WT	7	minus3	3.89548	0.715267
GKC564	MIP-1	WT	7	minus3	2.03789	1.13861
GKC564	MIP-1	WT	7	minus3	1.24271	-0.135844
GKC564	MIP-1	WT	7	minus3	2.50289	-1.1218
GKC564	MIP-1	WT	7	minus3	3.67795	0.683448
GKC564	MIP-1	WT	7	minus3	2.00541	0.842766
GKC564	MIP-1	WT	7	minus3	2.21213	0.501084
GKC564	MIP-1	WT	7	minus3	1.75853	0.996781
GKC564	MIP-1	WT	7	minus3	3.34104	1.45983
GKC564	MIP-1	WT	7	minus3	0.756545	-0.407532
GKC564	MIP-1	WT	7	minus3	0.442535	0.239858
GKC564	MIP-1	WT	7	minus3	0.63663	0.428311
GKC564	MIP-1	WT	7	minus3	0.850988	-0.998957
GKC564	MIP-1	WT	7	minus3	0.498639	-1.39043
GKC564	MIP-1	WT	7	minus3	1.03342	-1.03367
GKC564	MIP-1	WT	7	minus3	0.920502	-0.0658941
GKC564	MIP-1	WT	7	minus3	1.57367	-0.542684
GKC564	MIP-1	WT	7	minus3	0.407108	-0.505398
GKC564	MIP-1	WT	7	minus3	2.31191	-0.515703
GKC564	MIP-1	WT	7	minus3	0.551745	2.48718
GKC564	MIP-1	WT	8	minus3	3.91106	9.61106
GKC564	MIP-1	WT	8	minus3	6.15422	9.98964
GKC564	MIP-1	WT	8	minus3	7.26998	8.50734
GKC564	MIP-1	WT	8	minus3	7.54848	7.74351
GKC564	MIP-1	WT	8	minus3	3.79342	9.85699
GKC564	MIP-1	WT	8	minus3	5.32858	8.06245
GKC564	MIP-1	WT	8	minus3	7.48392	9.35108
GKC564	MIP-1	WT	8	minus3	2.95941	8.26292
GKC564	MIP-1	WT	8	minus3	0.752114	6.33663
GKC564	MIP-1	WT	8	minus3	2.56814	9.28889
GKC564	MIP-1	WT	8	minus3	11.0283	7.44382
GKC564	MIP-1	WT	8	minus3	5.92403	9.537
GKC564	MIP-1	WT	8	minus3	1.13097	9.20348
GKC564	MIP-1	WT	8	minus3	7.07891	7.42076
GKC564	MIP-1	WT	8	minus3	0.979723	9.11191
GKC564	MIP-1	WT	8	minus3	7.28425	5.41074
GKC564	MIP-1	WT	8	minus3	3.39973	5.94965
GKC564	MIP-1	WT	8	minus3	3.27971	4.07891
GKC564	MIP-1	WT	8	minus3	3.59318	13.3779
GKC564	MIP-1	WT	8	minus3	2.54407	12.8085
GKC564	MIP-1	WT	8	minus3	4.10709	12.2559
GKC564	MIP-1	WT	8	minus3	0.562058	13.5441
GKC564	MIP-1	WT	8	minus3	4.75085	11.7886
GKC564	MIP-1	WT	8	minus3	1.69705	13.6361
GKC564	MIP-1	WT	8	minus3	5.68283	11.0313
GKC564	MIP-1	WT	8	minus3	2.77302	10.2137
GKC564	MIP-1	WT	8	minus3	1.85303	13.7187
GKC564	MIP-1	WT	8	minus3	2.25846	12.6898
GKC564	MIP-1	WT	8	minus3	5.57742	11.3716
GKC564	MIP-1	WT	8	minus3	3.23065	9.55526
GKC564	MIP-1	WT	8	minus3	2.89644	9.59652
GKC564	MIP-1	WT	8	minus3	5.00007	9.2284
GKC564	MIP-1	WT	8	minus3	8.70942	10.1895
GKC564	MIP-1	WT	8	minus3	0.587438	13.5896
GKC564	MIP-1	WT	8	minus3	5.27176	11.5269
GKC564	MIP-1	WT	8	minus3	6.6977	9.24995
GKC564	MIP-1	WT	8	minus3	4.07475	8.67965
GKC564	MIP-1	WT	8	minus3	2.3922	10.948
GKC564	MIP-1	WT	8	minus3	0.382611	14.0207
GKC564	MIP-1	WT	8	minus3	0.442535	14.4218
GKC564	MIP-1	WT	8	minus3	2.35223	13.1654
GKC564	MIP-1	WT	8	minus3	0.582407	14.5013
GKC564	MIP-1	WT	8	minus3	3.29669	11.6935
GKC564	MIP-1	WT	8	minus3	4.43299	7.30317
GKC564	MIP-1	WT	8	minus3	1.83887	11.1608
GKC564	MIP-1	WT	8	minus3	2.82591	6.02903
GKC564	MIP-1	WT	8	minus3	1.13097	4.44296
GKC564	MIP-1	WT	8	minus3	0.884041	3.53636
GKC564	MIP-1	WT	8	minus3	0.64624	2.86275
GKC564	MIP-1	WT	8	minus3	0.936476	9.84614
GKC564	MIP-1	WT	8	minus3	1.13097	9.27153
GKC564	MIP-1	WT	8	minus3	0.13923	8.91264
GKC564	MIP-1	WT	8	minus3	3.11617	8.79661
GKC564	MIP-1	WT	8	minus3	0.252649	5.49917
GKC564	MIP-1	WT	8	minus3	0.430888	5.34136
GKC564	MIP-1	WT	8	minus3	0.13923	7.0813
GKC564	MIP-1	WT	8	minus3	3.62155	6.43395
GKC564	MIP-1	WT	8	minus3	2.34972	4.07811
GKC564	MIP-1	WT	8	minus3	1.79605	3.64162
GKC564	MIP-1	WT	8	minus3	2.33967	4.03662
GKC564	MIP-1	WT	8	minus3	4.80016	4.16578
GKC564	MIP-1	WT	8	minus3	0.734259	2.08447
GKC564	MIP-1	WT	8	minus3	0.436731	1.81591
GKC564	MIP-1	WT	8	minus3	0.430888	1.75171
GKC564	MIP-1	WT	8	minus3	1.71178	1.49037
GKC564	MIP-1	WT	8	minus3	0.324341	1.00541
GKC564	MIP-1	WT	8	minus3	0.289609	1.01722
GKC564	MIP-1	WT	8	minus3	1.53353	1.71933
GKC564	MIP-1	WT	8	minus3	2.06476	1.00918
GKC564	MIP-1	WT	8	minus3	0.924509	1.71237
GKC564	MIP-1	WT	8	minus3	3.89352	0.51074
GKC564	MIP-1	WT	8	minus3	0.357302	1.30223
GKC564	MIP-1	WT	8	minus3	0.964109	0.559428
GKC564	MIP-1	WT	8	minus3	2.38474	0.979202
GKC564	MIP-1	WT	8	minus3	1.13097	2.17431
GKC564	MIP-1	WT	8	minus3	1.13097	3.69268
GKC564	MIP-1	WT	8	minus3	0.607354	1.60436
GKC564	MIP-1	WT	8	minus3	2.61118	-0.840832
GKC564	MIP-1	WT	8	minus3	3.66791	-0.95507
GKC564	MIP-1	WT	8	minus3	2.68215	-0.294687
GKC564	MIP-1	WT	8	minus3	1.45163	12.3237
GKC564	MIP-1	WT	8	minus3	4.00583	11.3156
GKC564	MIP-1	WT	8	minus3	1.98635	14.2946
GKC564	MIP-1	WT	8	minus3	1.70884	10.4873
GKC564	MIP-1	WT	8	minus3	2.44171	2.8512
GKC564	MIP-1	WT	8	minus3	0.651018	7.52182
GKC564	MIP-1	WT	8	minus3	2.36476	1.83382
GKC564	MIP-1	WT	8	minus3	1.12964	1.7088
GKC564	MIP-1	WT	8	minus3	1.57367	0.695018
GKC564	MIP-1	WT	8	minus3	1.65244	1.73569
GKC564	MIP-1	WT	8	minus3	1.19742	0.33921
GKC564	MIP-1	WT	8	minus3	1.2358	-0.796201
GKC564	MIP-1	WT	8	minus3	4.00198	-0.363912
GKC564	MIP-1	WT	8	minus3	2.74754	1.42589
GKC564	MIP-1	WT	8	minus3	1.24271	0.552293
GKC564	MIP-1	WT	8	minus3	1.5706	0.862306
GKC564	MIP-1	WT	8	minus3	2.32202	-0.740392
GKC564	MIP-1	WT	8	minus3	2.09145	0.601227
GKC564	MIP-1	WT	8	minus3	2.78225	-0.691887
GKC564	MIP-1	WT	8	minus3	1.83319	0.303757
GKC564	MIP-1	WT	8	minus3	1.43241	0.667126
GKC564	MIP-1	WT	8	minus3	2.90999	0.104188
GKC564	MIP-1	WT	8	minus3	1.29735	4.57517
GKC564	MIP-1	WT	8	minus3	1.20093	6.2675
GKC564	MIP-1	WT	8	minus3	0.551745	7.28959
GKC564	MIP-1	WT	8	minus3	1.33091	4.66876
GKC564	MIP-1	WT	8	minus3	1.41952	2.66429
GKC564	MIP-1	WT	8	minus3	0.597437	2.14011
GKC564	MIP-1	WT	8	minus3	0.979723	1.84041
GKC564	MIP-1	WT	8	minus3	0.602406	2.20137
GKC564	MIP-1	WT	8	minus3	0.936476	1.62155
GKC564	MIP-1	WT	8	minus3	0.813018	6.942
GKC564	MIP-1	WT	8	minus3	1.66141	2.18007
GKC564	MIP-1	WT	8	minus3	0.76976	0.807241
GKC564	MIP-1	WT	8	minus3	0.928507	0.85428
GKC564	MIP-1	WT	8	minus3	0.983606	1.05446
GKC564	MIP-1	WT	8	minus3	1.77878	0.164735
GKC564	MIP-1	WT	8	minus3	0.821531	0.032947
GKC564	MIP-1	WT	8	minus3	0.587438	-0.118792
GKC564	MIP-1	WT	8	minus3	0.76976	-0.513918
GKC564	MIP-1	WT	8	minus3	0.626948	1.50237
GKC564	MIP-1	WT	8	minus3	2.24307	0.560099
GKC564	MIP-1	WT	8	minus3	0.948368	-0.536339
GKC564	MIP-1	WT	8	minus3	0.70706	-0.250917
GKC564	MIP-1	WT	9	minus3	3.35366	4.35207
GKC564	MIP-1	WT	9	minus3	0.987483	4.59314
GKC564	MIP-1	WT	9	minus3	0.587438	10.159
GKC564	MIP-1	WT	9	minus3	1.50857	7.7094
GKC564	MIP-1	WT	9	minus3	1.06722	11.161
GKC564	MIP-1	WT	9	minus3	2.21988	6.36244
GKC564	MIP-1	WT	9	minus3	3.35366	8.67131
GKC564	MIP-1	WT	9	minus3	1.32423	5.38365
GKC564	MIP-1	WT	9	minus3	0.916487	7.2904
GKC564	MIP-1	WT	9	minus3	1.90078	8.84211
GKC564	MIP-1	WT	9	minus3	1.77301	7.69837
GKC564	MIP-1	WT	9	minus3	3.23279	2.47284
GKC564	MIP-1	WT	9	minus3	4.75791	3.61568
GKC564	MIP-1	WT	9	minus3	2.47851	13.7103
GKC564	MIP-1	WT	9	minus3	2.65624	10.1931
GKC564	MIP-1	WT	9	minus3	1.58591	7.29132
GKC564	MIP-1	WT	9	minus3	4.92926	3.82949
GKC564	MIP-1	WT	9	minus3	1.32423	13.9005
GKC564	MIP-1	WT	9	minus3	2.91224	2.49621
GKC564	MIP-1	WT	9	minus3	1.43562	-0.91042
GKC564	MIP-1	WT	9	minus3	1.53664	-0.736383
GKC564	MIP-1	WT	9	minus3	9.94687	2.42244
GKC564	MIP-1	WT	9	minus3	1.63443	1.62667
GKC564	MIP-1	WT	9	minus3	1.91749	4.56649
GKC564	MIP-1	WT	9	minus3	2.99509	5.44947
GKC564	MIP-1	WT	9	minus3	4.02119	-0.769558
GKC564	MIP-1	WT	9	minus3	1.10781	11.4531
GKC564	MIP-1	WT	9	minus3	4.50217	2.24581
GKC564	MIP-1	WT	9	minus3	3.44964	3.30076
GKC564	MIP-1	WT	9	minus3	3.08557	5.30605
GKC564	MIP-1	WT	9	minus3	2.37725	14.7
GKC564	MIP-1	WT	9	minus3	0.948368	5.11094
GKC564	MIP-1	WT	9	minus3	1.46438	3.31298
GKC564	MIP-1	WT	9	minus3	1.20795	3.97012
GKC564	MIP-1	WT	9	minus3	2.53683	5.0594
GKC564	MIP-1	WT	9	minus3	1.79605	3.79444
GKC564	MIP-1	WT	9	minus3	6.8176	3.91909
GKC564	MIP-1	WT	9	minus3	2.41702	2.91644
GKC564	MIP-1	WT	9	minus3	3.72993	7.8116
GKC564	MIP-1	WT	9	minus3	1.33425	3.46232
GKC564	MIP-1	WT	9	minus3	1.08576	4.14438
GKC564	MIP-1	WT	9	minus3	2.56334	2.50221
GKC564	MIP-1	WT	9	minus3	2.32959	5.5312
GKC564	MIP-1	WT	9	minus3	0.830001	6.63924
GKC564	MIP-1	WT	9	minus3	1.74399	5.56076
GKC564	MIP-1	WT	9	minus3	1.82465	7.44539
GKC564	MIP-1	WT	9	minus3	1.24271	7.36107
GKC564	MIP-1	WT	9	minus3	1.00675	1.94043
GKC564	MIP-1	WT	9	minus3	0.875836	7.56912
GKC564	MIP-1	WT	9	minus3	2.48095	1.92439
GKC564	MIP-1	WT	9	minus3	0.948368	2.71158
GKC564	MIP-1	WT	9	minus3	1.27359	2.73658
GKC564	MIP-1	WT	9	minus3	1.48971	6.19358
GKC564	MIP-1	WT	10	minus3	3.07241	2.52992
GKC564	MIP-1	WT	10	minus3	1.68521	5.61167
GKC564	MIP-1	WT	10	minus3	7.9521	0.118792
GKC564	MIP-1	WT	10	minus3	5.90663	-0.996781
GKC564	MIP-1	WT	10	minus3	1.98088	-0.786812
GKC564	MIP-1	WT	10	minus3	4.14687	1.0671
GKC564	MIP-1	WT	10	minus3	5.66183	-1.38507
GKC564	MIP-1	WT	10	minus3	1.6644	-1.00217
GKC564	MIP-1	WT	10	minus3	1.57979	0.294687
GKC564	MIP-1	WT	10	minus3	2.90547	0.629452
GKC564	MIP-1	WT	10	minus3	3.43304	0.899279
GKC564	MIP-1	WT	10	minus3	6.26232	1.11486
GKC564	MIP-1	WT	10	minus3	10.0054	-0.200409
GKC564	MIP-1	WT	10	minus3	6.33897	-0.5601
GKC564	MIP-1	WT	10	minus3	1.5023	-1.63437
GKC564	MIP-1	WT	10	minus3	4.57083	-1.08641
GKC564	MIP-1	WT	10	minus3	4.97595	0.0465941
GKC564	MIP-1	WT	10	minus3	1.29058	0.362417
GKC564	MIP-1	WT	10	minus3	3.95568	0.913649
GKC564	MIP-1	WT	10	minus3	3.72595	4.77732
GKC564	MIP-1	WT	10	minus3	0.74767	2.72929
GKC564	MIP-1	WT	10	minus3	6.47125	-0.936709
GKC564	MIP-1	WT	10	minus3	1.40657	-1.80678
GKC564	MIP-1	WT	10	minus3	2.81446	3.36983
GKC564	MIP-1	WT	10	minus3	1.43562	-1.2757
GKC564	MIP-1	WT	10	minus3	1.53353	-0.85428
GKC564	MIP-1	WT	10	minus3	3.12706	-1.56948
GKC564	MIP-1	WT	10	minus3	2.83049	-1.44491
GKC564	MIP-1	WT	10	minus3	3.33051	-0.375654
GKC564	MIP-1	WT	10	minus3	2.20177	-0.61285
GKC564	MIP-1	WT	10	minus3	3.1118	-1.09833
GKC564	MIP-1	WT	10	minus3	1.92859	-1.06267
GKC564	MIP-1	WT	10	minus3	1.22191	-1.76375
GKC564	MIP-1	WT	10	minus3	2.95941	-0.736207
GKC564	MIP-1	WT	10	minus3	1.26334	-0.757285
GKC564	MIP-1	WT	10	minus3	5.26002	1.18027
GKC564	MIP-1	WT	10	minus3	6.66793	0.0931883
GKC564	MIP-1	WT	10	minus3	1.81609	8.84128
GKC564	MIP-1	WT	10	minus3	0.838427	5.26856
GKC564	MIP-1	WT	10	minus3	1.26334	0.489793
GKC564	MIP-1	WT	10	minus3	2.29162	0.823676
GKC564	MIP-1	WT	10	minus3	7.34685	0.604827
GKC564	MIP-1	WT	10	minus3	4.72434	4.63961
GKC564	MIP-1	WT	10	minus3	10.3168	2.67081
GKC564	MIP-1	WT	10	minus3	2.81216	1.92967
GKC564	MIP-1	WT	10	minus3	8.89102	7.01584
GKC564	MIP-1	WT	10	minus3	0.660522	3.00077
GKC564	MIP-1	WT	10	minus3	7.77646	6.14745
GKC564	MIP-1	WT	10	minus3	7.79852	2.90275
GKC564	MIP-1	WT	10	minus3	2.36976	-0.279565
GKC564	MIP-1	WT	10	minus3	1.8218	5.02194
GKC564	MIP-1	WT	10	minus3	6.91159	1.13861
GKC564	MIP-1	WT	10	minus3	4.99663	1.35055
GKC564	MIP-1	WT	10	minus3	3.35156	0.589657
GKC564	MIP-1	WT	10	minus3	0.572278	5.84509
GKC564	MIP-1	WT	10	minus3	2.25333	0.0931883
GKC564	MIP-1	WT	10	minus3	5.46112	0.303757
GKC564	MIP-1	WT	10	minus3	2.20695	2.98681
GKC564	MIP-1	WT	10	minus3	2.83735	-0.572849
GKC564	MIP-1	WT	10	minus3	4.31709	-0.177425
GKC564	MIP-1	WT	10	minus3	6.91452	-0.465941
GKC564	MIP-1	WT	10	minus3	3.77364	-0.676017
GKC564	MIP-1	WT	10	minus3	4.80192	-0.576338
GKC564	MIP-1	WT	10	minus3	4.34667	3.30063
GKC564	MIP-1	WT	10	minus3	5.92877	0.0465941
GKC564	MIP-1	WT	10	minus3	1.44524	0.501834
GKC564	MIP-1	WT	10	minus3	0.556913	8.25657
GKC564	MIP-1	WT	10	minus3	4.85969	-0.200409
GKC564	MIP-1	WT	10	minus3	3.68196	0.969561
GKC564	MIP-1	WT	10	minus3	2.78917	0.208375
GKC564	MIP-1	WT	10	minus3	1.07836	0.356377
GKC564	MIP-1	WT	10	minus3	3.17475	0.55913
GKC564	MIP-1	WT	10	minus3	4.25949	0.977538
GKC564	MIP-1	WT	10	minus3	0.504074	5.71849
GKC564	MIP-1	WT	10	minus3	3.05923	0.613122
GKC564	MIP-1	WT	10	minus3	6.22228	0.553576
GKC564	MIP-1	WT	10	minus3	4.5474	0.605724
GKC564	MIP-1	WT	10	minus3	5.59045	-1.20651
GKC564	MIP-1	WT	10	minus3	2.45892	-0.51074
GKC564	MIP-1	WT	10	minus3	2.94821	0.501834
GKC564	MIP-1	WT	10	minus3	3.51767	-0.598791
GKC564	MIP-1	WT	10	minus3	4.95868	0.998957
GKC564	MIP-1	WT	10	minus3	1.80752	-0.177425
GKC564	MIP-1	WT	10	minus3	1.89519	-0.526439
GKC564	MIP-1	WT	10	minus3	1.11875	-0.368359
GKC564	MIP-1	WT	10	minus3	2.45646	1.80468
GKC564	MIP-1	WT	10	minus3	1.75853	1.0829
GKC564	MIP-1	WT	10	minus3	4.29855	0.428311
GKC564	MIP-1	WT	10	minus3	5.57579	0.667376
GKC564	MIP-1	WT	10	minus3	1.18685	0.521258
GKC564	MIP-1	WT	10	minus3	1.27699	-0.350232
GKC564	MIP-1	WT	10	minus3	4.61034	0.596066
GKC564	MIP-1	WT	10	minus3	7.15536	6.18843
GKC564	MIP-1	WT	10	minus3	3.56063	6.61951
GKC564	MIP-1	WT	10	minus3	5.76326	6.91686
GKC564	MIP-1	WT	10	minus3	2.51018	4.92899
GKC564	MIP-1	WT	10	minus3	1.14767	1.34488
GKC564	MIP-1	WT	10	minus3	4.00006	1.13236
GKC564	MIP-1	WT	10	minus3	0.991351	2.94443
GKC564	MIP-1	WT	10	minus3	1.98088	1.26288
GKC564	MIP-1	WT	10	minus3	2.57054	0.843856
GKC564	MIP-1	WT	10	minus3	2.81446	0.864385
GKC564	MIP-1	WT	10	minus3	1.63443	0.890367
GKC564	MIP-1	WT	10	minus3	3.64577	0.566178
GKC564	MIP-1	WT	10	minus3	0.743213	2.18079
GKC564	MIP-1	WT	10	minus3	1.97267	2.59127
GKC564	MIP-1	WT	10	minus3	1.06722	6.31774
GKC564	MIP-1	WT	10	minus3	1.13097	4.48888
GKC564	MIP-1	WT	10	minus3	0.791537	10.0226
GKC564	MIP-1	WT	1	minus4	2.24307	15.9329
GKC564	MIP-1	WT	1	minus4	2.73126	12.6279
GKC564	MIP-1	WT	1	minus4	0.401054	11.6426
GKC564	MIP-1	WT	1	minus4	4.02311	11.3949
GKC564	MIP-1	WT	1	minus4	0.407108	4.77376
GKC564	MIP-1	WT	1	minus4	0.394954	7.86164
GKC564	MIP-1	WT	1	minus4	2.28908	6.69733
GKC564	MIP-1	WT	1	minus4	0.582407	-1.58804
GKC564	MIP-1	WT	1	minus4	0.622078	-0.683448
GKC564	MIP-1	WT	1	minus4	0.702477	-1.19395
GKC564	MIP-1	WT	1	minus4	0.357302	2.09861
GKC564	MIP-1	WT	1	minus4	1.08576	4.27372
GKC564	MIP-1	WT	1	minus4	0.204323	11.8511
GKC564	MIP-1	WT	1	minus4	2.12062	7.71874
GKC564	MIP-1	WT	1	minus4	3.69998	8.16809
GKC564	MIP-1	WT	1	minus4	0.77414	3.1959
GKC564	MIP-1	WT	1	minus4	3.67995	8.46182
GKC564	MIP-1	WT	1	minus4	0.729761	3.6929
GKC564	MIP-1	WT	1	minus4	1.25991	3.54027
GKC564	MIP-1	WT	1	minus4	1.00291	2.61266
GKC564	MIP-1	WT	1	minus4	2.27634	8.59469
GKC564	MIP-1	WT	1	minus4	2.57294	4.52563
GKC564	MIP-1	WT	1	minus4	3.33051	3.65772
GKC564	MIP-1	WT	1	minus4	0.482154	1.67457
GKC564	MIP-1	WT	1	minus4	1.83319	2.3534
GKC564	MIP-1	WT	1	minus4	2.04328	2.03346
GKC564	MIP-1	WT	1	minus4	0.493175	0.294687
GKC564	MIP-1	WT	1	minus4	0.471005	0.200409
GKC564	MIP-1	WT	1	minus4	2.0325	0.586605
GKC564	MIP-1	WT	1	minus4	0.81728	-1.06267
GKC564	MIP-1	WT	1	minus4	0.363711	-0.54667
GKC564	MIP-1	WT	1	minus4	2.74289	0.257325
GKC564	MIP-1	WT	1	minus4	0.607354	-0.751308
GKC564	MIP-1	WT	1	minus4	0.830001	1.13765
GKC564	MIP-1	WT	1	minus4	0.541334	0.0736718
GKC564	MIP-1	WT	1	minus4	0.626948	-0.294687
GKC564	MIP-1	WT	1	minus4	0.562058	-0.250917
GKC564	MIP-1	WT	1	minus4	0.702477	-0.2815
GKC564	MIP-1	WT	1	minus4	1.15126	2.8994
GKC564	MIP-1	WT	1	minus4	1.53664	0.032947
GKC564	MIP-1	WT	1	minus4	4.5221	1.89447
GKC564	MIP-1	WT	1	minus4	1.77301	0.396735
GKC564	MIP-1	WT	1	minus4	0.4483	1.95898
GKC564	MIP-1	WT	1	minus4	0.631798	1.86094
GKC564	MIP-1	WT	1	minus4	1.02203	0.0465941
GKC564	MIP-1	WT	1	minus4	1.93966	0.575395
GKC564	MIP-1	WT	1	minus4	1.83034	1.37037
GKC564	MIP-1	WT	1	minus4	1.12238	1.08775
GKC564	MIP-1	WT	1	minus4	0.875836	1.43132
GKC564	MIP-1	WT	1	minus4	0.626948	1.13908
GKC564	MIP-1	WT	1	minus4	0.795856	0.250917
GKC564	MIP-1	WT	1	minus4	0.77414	0.343977
GKC564	MIP-1	WT	1	minus4	0.760963	1.57054
GKC564	MIP-1	WT	1	minus4	0.525528	-0.33921
GKC564	MIP-1	WT	1	minus4	0.530823	-0.589374
GKC564	MIP-1	WT	1	minus4	0.425006	-0.296523
GKC564	MIP-1	WT	1	minus4	0.738743	1.28197
GKC564	MIP-1	WT	1	minus4	1.14047	-0.740393
GKC564	MIP-1	WT	1	minus4	1.02584	-0.32947
GKC564	MIP-1	WT	1	minus4	0.498639	0.294687
GKC564	MIP-1	WT	1	minus4	0.556913	-0.396735
GKC564	MIP-1	WT	1	minus4	1.28719	6.36526
GKC564	MIP-1	WT	1	minus4	2.25589	2.11255
GKC564	MIP-1	WT	1	minus4	0.920502	10.5048
GKC564	MIP-1	WT	1	minus4	1.17623	0.167998
GKC564	MIP-1	WT	1	minus4	0.471005	-0.0931883
GKC564	MIP-1	WT	1	minus4	0.813018	0.0658941
GKC564	MIP-1	WT	1	minus4	0.924509	0.0736718
GKC564	MIP-1	WT	1	minus4	1.08945	1.74598
GKC564	MIP-1	WT	1	minus4	0.734259	-0.530547
GKC564	MIP-1	WT	1	minus4	0.551745	-0.572849
GKC564	MIP-1	WT	1	minus4	0.442535	0.232971
GKC564	MIP-1	WT	1	minus4	0.688634	0.0736718
GKC564	MIP-1	WT	1	minus4	1.72939	4.14324
GKC564	MIP-1	WT	1	minus4	0.932496	0.863757
GKC564	MIP-1	WT	1	minus4	0.363711	0.505398
GKC564	MIP-1	WT	1	minus4	1.01441	1.6674
GKC564	MIP-1	WT	1	minus4	1.91749	3.89539
GKC564	MIP-1	WT	1	minus4	0.442535	0.177425
GKC564	MIP-1	WT	1	minus4	1.51483	1.42486
GKC564	MIP-1	WT	1	minus4	0.971932	-0.164735
GKC564	MIP-1	WT	1	minus4	0.476596	-1.52298
GKC564	MIP-1	WT	1	minus4	1.02584	0.583823
GKC564	MIP-1	WT	1	minus4	0.631798	-0.819254
GKC564	MIP-1	WT	1	minus4	0.382611	0.32947
GKC564	MIP-1	WT	1	minus4	0.617189	-0.703793
GKC564	MIP-1	WT	1	minus4	1.19038	-0.032947
GKC564	MIP-1	WT	1	minus4	0.430888	-0.803872
GKC564	MIP-1	WT	1	minus4	1.37065	1.42131
GKC564	MIP-1	WT	1	minus4	1.38049	0.652318
GKC564	MIP-1	WT	1	minus4	1.18685	1.67739
GKC564	MIP-1	WT	1	minus4	3.079	2.44608
GKC564	MIP-1	WT	1	minus4	1.29735	2.45213
GKC564	MIP-1	WT	1	minus4	0.13923	1.53893
GKC564	MIP-1	WT	1	minus4	0.785398	1.68184
GKC564	MIP-1	WT	1	minus4	0.221013	3.25174
GKC564	MIP-1	WT	1	minus4	2.37226	1.33234
GKC564	MIP-1	WT	1	minus4	0.641444	2.34416
GKC564	MIP-1	WT	1	minus4	0.76976	4.09416
GKC564	MIP-1	WT	1	minus4	0.592448	5.22715
GKC564	MIP-1	WT	1	minus4	0.631798	3.3988
GKC564	MIP-1	WT	1	minus4	1.71766	7.036
GKC564	MIP-1	WT	2	minus4	2.09411	6.41885
GKC564	MIP-1	WT	2	minus4	7.60021	5.59932
GKC564	MIP-1	WT	2	minus4	1.59507	8.94074
GKC564	MIP-1	WT	2	minus4	1.49286	7.61719
GKC564	MIP-1	WT	2	minus4	0.743213	9.70695
GKC564	MIP-1	WT	2	minus4	2.90322	4.53269
GKC564	MIP-1	WT	2	minus4	3.09214	4.54236
GKC564	MIP-1	WT	2	minus4	6.07953	1.50902
GKC564	MIP-1	WT	2	minus4	4.50943	3.28446
GKC564	MIP-1	WT	2	minus4	4.67819	1.47977
GKC564	MIP-1	WT	2	minus4	0.879943	0.755851
GKC564	MIP-1	WT	2	minus4	8.80694	2.26779
GKC564	MIP-1	WT	2	minus4	5.45454	1.68682
GKC564	MIP-1	WT	2	minus4	5.80006	3.88806
GKC564	MIP-1	WT	2	minus4	1.47391	6.69027
GKC564	MIP-1	WT	2	minus4	2.50776	2.0697
GKC564	MIP-1	WT	2	minus4	3.31996	-0.135844
GKC564	MIP-1	WT	2	minus4	2.20954	-0.58038
GKC564	MIP-1	WT	2	minus4	4.19398	0.654235
GKC564	MIP-1	WT	2	minus4	4.13741	-0.520938
GKC564	MIP-1	WT	2	minus4	1.52107	-0.521258
GKC564	MIP-1	WT	2	minus4	1.21145	-1.02629
GKC564	MIP-1	WT	2	minus4	1.60723	-1.50578
GKC564	MIP-1	WT	2	minus4	3.63972	-0.230629
GKC564	MIP-1	WT	2	minus4	3.59927	3.7878
GKC564	MIP-1	WT	2	minus4	5.22809	0.032947
GKC564	MIP-1	WT	2	minus4	3.98272	2.4645
GKC564	MIP-1	WT	2	minus4	1.69113	-0.294687
GKC564	MIP-1	WT	2	minus4	2.92126	2.84001
GKC564	MIP-1	WT	2	minus4	3.02835	3.69173
GKC564	MIP-1	WT	2	minus4	2.36476	-1.22185
GKC564	MIP-1	WT	2	minus4	3.62761	0.85472
GKC564	MIP-1	WT	2	minus4	1.80752	-0.976426
GKC564	MIP-1	WT	2	minus4	2.27634	1.75395
GKC564	MIP-1	WT	2	minus4	1.92304	-2.17206
GKC564	MIP-1	WT	2	minus4	5.31023	-0.303757
GKC564	MIP-1	WT	2	minus4	0.979723	-0.604827
GKC564	MIP-1	WT	2	minus4	3.5033	0.33921
GKC564	MIP-1	WT	2	minus4	1.10048	1.8717
GKC564	MIP-1	WT	2	minus4	0.964109	10.0768
GKC564	MIP-1	WT	2	minus4	2.52958	-1.6494
GKC564	MIP-1	WT	2	minus4	4.07856	-0.987312
GKC564	MIP-1	WT	2	minus4	2.21471	0.0736718
GKC564	MIP-1	WT	2	minus4	3.71996	-0.0465941
GKC564	MIP-1	WT	2	minus4	1.20093	-0.716026
GKC564	MIP-1	WT	2	minus4	1.44204	-0.639716
GKC564	MIP-1	WT	2	minus4	2.64915	-0.658941
GKC564	MIP-1	WT	2	minus4	2.93699	-1.06913
GKC564	MIP-1	WT	2	minus4	8.52327	0.303757
GKC564	MIP-1	WT	2	minus4	4.01736	2.08774
GKC564	MIP-1	WT	2	minus4	2.63968	-0.239858
GKC564	MIP-1	WT	2	minus4	2.33715	-0.574741
GKC564	MIP-1	WT	2	minus4	1.69409	-0.562999
GKC564	MIP-1	WT	2	minus4	2.89644	-0.032947
GKC564	MIP-1	WT	2	minus4	2.67744	0.527153
GKC564	MIP-1	WT	2	minus4	4.63897	0.797772
GKC564	MIP-1	WT	2	minus4	4.11278	0.890367
GKC564	MIP-1	WT	2	minus4	4.29112	0.303757
GKC564	MIP-1	WT	2	minus4	1.81895	-0.636313
GKC564	MIP-1	WT	2	minus4	2.8987	2.65041
GKC564	MIP-1	WT	2	minus4	1.67928	0.998957
GKC564	MIP-1	WT	2	minus4	2.46627	4.91997
GKC564	MIP-1	WT	2	minus4	5.48251	1.2876
GKC564	MIP-1	WT	2	minus4	1.98908	0.298348
GKC564	MIP-1	WT	2	minus4	1.68224	1.67033
GKC564	MIP-1	WT	2	minus4	5.51369	0.448128
GKC564	MIP-1	WT	2	minus4	2.07813	1.60943
GKC564	MIP-1	WT	2	minus4	1.19742	-0.638278
GKC564	MIP-1	WT	2	minus4	1.90078	0.032947
GKC564	MIP-1	WT	2	minus4	2.47362	-0.167998
GKC564	MIP-1	WT	2	minus4	1.03342	0.457715
GKC564	MIP-1	WT	2	minus4	0.863457	0.494206
GKC564	MIP-1	WT	2	minus4	2.23278	2.27388
GKC564	MIP-1	WT	2	minus4	4.07856	0.863757
GKC564	MIP-1	WT	2	minus4	2.1259	0.78106
GKC564	MIP-1	WT	2	minus4	1.27018	1.28925
GKC564	MIP-1	WT	3	minus4	0.317548	6.48964
GKC564	MIP-1	WT	3	minus4	0.376364	5.02687
GKC564	MIP-1	WT	3	minus4	5.49894	2.10843
GKC564	MIP-1	WT	3	minus4	2.44663	1.19988
GKC564	MIP-1	WT	3	minus4	0.626948	1.37603
GKC564	MIP-1	WT	3	minus4	0.536092	2.72393
GKC564	MIP-1	WT	3	minus4	3.18554	-1.16065
GKC564	MIP-1	WT	3	minus4	0.651019	-1.84041
GKC564	MIP-1	WT	3	minus4	0.952317	-1.82353
GKC564	MIP-1	WT	3	minus4	1.3409	-0.977538
GKC564	MIP-1	WT	3	minus4	1.43883	-1.29809
GKC564	MIP-1	WT	3	minus4	1.02963	-2.18079
GKC564	MIP-1	WT	3	minus4	1.51795	-2.15627
GKC564	MIP-1	WT	3	minus4	2.9145	-1.19395
GKC564	MIP-1	WT	3	minus4	0.72525	-0.85046
GKC564	MIP-1	WT	3	minus4	3.69999	-0.221016
GKC564	MIP-1	WT	3	minus4	2.88059	-0.781061
GKC564	MIP-1	WT	3	minus4	5.65213	-1.3121
GKC564	MIP-1	WT	3	minus4	1.24961	-1.95285
GKC564	MIP-1	WT	3	minus4	0.350835	0.964511
GKC564	MIP-1	WT	3	minus4	0.646241	-1.29555
GKC564	MIP-1	WT	3	minus4	1.06722	-1.4294
GKC564	MIP-1	WT	3	minus4	1.63443	-1.53831
GKC564	MIP-1	WT	3	minus4	4.69952	-1.11986
GKC564	MIP-1	WT	3	minus4	2.52474	-0.343977
GKC564	MIP-1	WT	3	minus4	1.08945	1.35456
GKC564	MIP-1	WT	3	minus4	1.99726	-0.691888
GKC564	MIP-1	WT	3	minus4	4.78962	-0.0329471
GKC564	MIP-1	WT	3	minus4	1.04098	-0.803872
GKC564	MIP-1	WT	3	minus4	0.932497	-0.79347
GKC564	MIP-1	WT	3	minus4	0.21275	2.60267
GKC564	MIP-1	WT	3	minus4	0.813019	1.76576
GKC564	MIP-1	WT	3	minus4	0.49864	7.59401
GKC564	MIP-1	WT	3	minus4	4.94313	-1.1218
GKC564	MIP-1	WT	3	minus4	1.44204	-2.00348
GKC564	MIP-1	WT	3	minus4	1.29735	-0.263576
GKC564	MIP-1	WT	3	minus4	1.12238	-1.25079
GKC564	MIP-1	WT	3	minus4	1.0372	-0.667377
GKC564	MIP-1	WT	3	minus4	7.95211	-1.47171
GKC564	MIP-1	WT	3	minus4	1.40981	-0.329471
GKC564	MIP-1	WT	3	minus4	3.96149	-1.6259
GKC564	MIP-1	WT	3	minus4	2.57534	-0.944786
GKC564	MIP-1	WT	3	minus4	5.87969	-1.98866
GKC564	MIP-1	WT	3	minus4	4.69064	-1.86442
GKC564	MIP-1	WT	3	minus4	0.612282	-1.19021
GKC564	MIP-1	WT	3	minus4	2.19138	-1.7838
GKC564	MIP-1	WT	3	minus4	0.975832	-1.82947
GKC564	MIP-1	WT	3	minus4	0.636631	-2.51366
GKC564	MIP-1	WT	3	minus4	2.69388	-1.09089
GKC564	MIP-1	WT	3	minus4	6.86175	-1.23992
GKC564	MIP-1	WT	3	minus4	6.39693	-1.41914
GKC564	MIP-1	WT	3	minus4	1.32424	-1.89988
GKC564	MIP-1	WT	3	minus4	1.60115	-0.582893
GKC564	MIP-1	WT	3	minus4	2.01898	-1.07838
GKC564	MIP-1	WT	3	minus4	1.64645	-1.8711
GKC564	MIP-1	WT	3	minus4	0.572278	-0.691888
GKC564	MIP-1	WT	3	minus4	1.27359	-1.19929
GKC564	MIP-1	WT	3	minus4	1.17977	-0.177425
GKC564	MIP-1	WT	3	minus4	0.631799	-1.0493
GKC564	MIP-1	WT	3	minus4	5.90822	-0.283421
GKC564	MIP-1	WT	3	minus4	2.22762	-0.815731
GKC564	MIP-1	WT	3	minus4	0.821532	-1.35055
GKC564	MIP-1	WT	3	minus4	0.800165	-0.751309
GKC564	MIP-1	WT	3	minus4	0.908431	-1.02136
GKC564	MIP-1	WT	3	minus4	1.09681	-1.48992
GKC564	MIP-1	WT	3	minus4	3.54225	6.07021
GKC564	MIP-1	WT	3	minus4	2.28144	5.26637
GKC564	MIP-1	WT	3	minus4	0.622079	1.50273
GKC564	MIP-1	WT	3	minus4	0.459723	-2.21536
GKC564	MIP-1	WT	3	minus4	2.71027	-1.34814
GKC564	MIP-1	WT	3	minus4	1.54284	-2.60629
GKC564	MIP-1	WT	3	minus4	0.679329	-2.15553
GKC564	MIP-1	WT	3	minus4	0.738744	-1.51532
GKC564	MIP-1	WT	3	minus4	1.76143	-0.667377
GKC564	MIP-1	WT	3	minus4	4.54379	-1.56151
GKC564	MIP-1	WT	3	minus4	0.952317	-0.237585
GKC564	MIP-1	WT	3	minus4	0.607354	-1.88641
GKC564	MIP-1	WT	3	minus4	0.968025	-1.79923
GKC564	MIP-1	WT	3	minus4	1.83603	-0.833702
GKC564	MIP-1	WT	3	minus4	2.64205	-0.526439
GKC564	MIP-1	WT	3	minus4	0.244934	6.45289
GKC564	MIP-1	WT	3	minus4	1.99726	1.48745
GKC564	MIP-1	WT	3	minus4	1.1939	1.5135
GKC564	MIP-1	WT	3	minus4	2.95941	1.19395
GKC564	MIP-1	WT	3	minus4	0.920503	3.05996
GKC564	MIP-1	WT	3	minus4	2.72195	1.86078
GKC564	MIP-1	WT	3	minus4	2.28654	4.41622
GKC564	MIP-1	WT	3	minus4	0.493175	3.0009
GKC564	MIP-1	WT	3	minus4	0.520206	2.36782
GKC564	MIP-1	WT	3	minus4	1.07836	3.25444
GKC564	MIP-1	WT	4	minus4	1.08576	6.22958
GKC564	MIP-1	WT	4	minus4	1.22887	2.00348
GKC564	MIP-1	WT	4	minus4	1.43241	2.38559
GKC564	MIP-1	WT	4	minus4	1.61632	2.20838
GKC564	MIP-1	WT	4	minus4	2.11533	0.613122
GKC564	MIP-1	WT	4	minus4	0.195718	8.65611
GKC564	MIP-1	WT	4	minus4	1.07836	2.53119
GKC564	MIP-1	WT	4	minus4	1.05226	11.9489
GKC564	MIP-1	WT	4	minus4	0.221013	-1.11545
GKC564	MIP-1	WT	4	minus4	1.04098	0.40217
GKC564	MIP-1	WT	4	minus4	0.546553	-1.43132
GKC564	MIP-1	WT	4	minus4	1.52419	0.89341
GKC564	MIP-1	WT	4	minus4	0.821532	-0.661659
GKC564	MIP-1	WT	4	minus4	0.859312	0.583823
GKC564	MIP-1	WT	4	minus4	0.382611	0.887127
GKC564	MIP-1	WT	4	minus4	0.49864	6.51571
GKC564	MIP-1	WT	4	minus4	1.86995	4.30665
GKC564	MIP-1	WT	4	minus4	3.80724	2.11638
GKC564	MIP-1	WT	4	minus4	1.09681	0.940756
GKC564	MIP-1	WT	4	minus4	2.09411	3.09076
GKC564	MIP-1	WT	4	minus4	3.28396	3.97559
GKC564	MIP-1	WT	4	minus4	0.0940923	2.69643
GKC564	MIP-1	WT	4	minus4	0.195718	7.5317
GKC564	MIP-1	WT	4	minus4	1.00675	6.42468
GKC564	MIP-1	WT	4	minus4	0.787206	6.84871
GKC564	MIP-1	WT	4	minus4	0.229125	5.15347
GKC564	MIP-1	WT	4	minus4	0.128716	2.57957
GKC564	MIP-1	WT	4	minus4	0.787206	1.89668
GKC564	MIP-1	WT	4	minus4	0.204323	3.164
GKC564	MIP-1	WT	4	minus4	0.168665	1.16173
GKC564	MIP-1	WT	4	minus4	0.785398	3.1616
GKC564	MIP-1	WT	4	minus4	0.357303	0.131788
GKC564	MIP-1	WT	4	minus4	0.514857	0.164735
GKC564	MIP-1	WT	4	minus4	0.791537	-0.0931883
GKC564	MIP-1	WT	4	minus4	0.785398	1.13608
GKC564	MIP-1	WT	4	minus4	0.702477	0.722585
GKC564	MIP-1	WT	4	minus4	1.19742	0.85046
GKC564	MIP-1	WT	4	minus4	0.551745	-0.504323
GKC564	MIP-1	WT	4	minus4	0.317548	2.36008
GKC564	MIP-1	WT	4	minus4	0.49864	0.652574
GKC564	MIP-1	WT	4	minus4	0.282413	0.486457
GKC564	MIP-1	WT	4	minus4	0.425006	0.709936
GKC564	MIP-1	WT	4	minus4	0.556914	1.09833
GKC564	MIP-1	WT	5	minus4	2.15221	12.1403
GKC564	MIP-1	WT	5	minus4	0.541334	1.63353
GKC564	MIP-1	WT	5	minus4	2.68684	2.09538
GKC564	MIP-1	WT	5	minus4	1.41628	2.89764
GKC564	MIP-1	WT	5	minus4	2.04058	4.07075
GKC564	MIP-1	WT	5	minus4	1.8502	5.38008
GKC564	MIP-1	WT	5	minus4	10.7273	4.65035
GKC564	MIP-1	WT	5	minus4	4.92233	3.41939
GKC564	MIP-1	WT	5	minus4	3.24776	2.63129
GKC564	MIP-1	WT	5	minus4	8.12852	14.0276
GKC564	MIP-1	WT	5	minus4	1.96719	7.28338
GKC564	MIP-1	WT	5	minus4	1.55521	-0.439568
GKC564	MIP-1	WT	5	minus4	1.24961	0.442031
GKC564	MIP-1	WT	5	minus4	1.97815	0.428311
GKC564	MIP-1	WT	5	minus4	4.4092	12.4361
GKC564	MIP-1	WT	5	minus4	6.47277	11.9351
GKC564	MIP-1	WT	5	minus4	3.42681	0.363912
GKC564	MIP-1	WT	5	minus4	2.87378	7.23338
GKC564	MIP-1	WT	5	minus4	1.81038	-0.76845
GKC564	MIP-1	WT	5	minus4	1.01822	4.22574
GKC564	MIP-1	WT	5	minus4	0.900337	-0.807241
GKC564	MIP-1	WT	5	minus4	2.92576	0.177425
GKC564	MIP-1	WT	5	minus4	1.13687	0.303757
GKC564	MIP-1	WT	5	minus4	2.41207	0.164735
GKC564	MIP-1	WT	5	minus4	1.16556	0.923105
GKC564	MIP-1	WT	5	minus4	0.952316	0.933047
GKC564	MIP-1	WT	5	minus4	5.26169	9.67436
GKC564	MIP-1	WT	5	minus4	1.38703	5.69014
GKC564	MIP-1	WT	5	minus4	0.363711	2.54466
GKC564	MIP-1	WT	5	minus4	0.252649	2.9035
GKC564	MIP-1	WT	5	minus4	2.01627	3.97968
GKC564	MIP-1	WT	5	minus4	0.260248	1.20886
GKC564	MIP-1	WT	5	minus4	1.77011	0.513918
GKC564	MIP-1	WT	5	minus4	1.64645	1.10964
GKC564	MIP-1	WT	5	minus4	0.465381	0.956774
GKC564	MIP-1	WT	5	minus4	1.26676	1.41914
GKC564	MIP-1	WT	6	minus4	0.436731	3.18987
GKC564	MIP-1	WT	6	minus4	0.734259	2.93409
GKC564	MIP-1	WT	6	minus4	0.683989	1.21379
GKC564	MIP-1	WT	6	minus4	0.425006	2.85442
GKC564	MIP-1	WT	6	minus4	0.0510814	2.26088
GKC564	MIP-1	WT	6	minus4	0.244934	8.72903
GKC564	MIP-1	WT	6	minus4	0.572278	5.06976
GKC564	MIP-1	WT	6	minus4	0.289609	4.94007
GKC564	MIP-1	WT	6	minus4	4.09189	3.91311
GKC564	MIP-1	WT	6	minus4	3.38929	-0.279565
GKC564	MIP-1	WT	6	minus4	4.92753	-0.551612
GKC564	MIP-1	WT	6	minus4	1.30409	5.75563
GKC564	MIP-1	WT	6	minus4	2.74754	0.192113
GKC564	MIP-1	WT	6	minus4	1.75853	-0.232971
GKC564	MIP-1	WT	6	minus4	8.16761	0.0931883
GKC564	MIP-1	WT	6	minus4	2.8987	0.823676
GKC564	MIP-1	WT	6	minus4	5.79847	0.296523
GKC564	MIP-1	WT	6	minus4	0.80446	-0.239858
GKC564	MIP-1	WT	6	minus4	2.23278	0.350232
GKC564	MIP-1	WT	6	minus4	3.6094	0.5
GKC564	MIP-1	WT	6	minus4	1.31082	0.596066
GKC564	MIP-1	WT	6	minus4	3.38929	3.21166
GKC564	MIP-1	WT	6	minus4	8.24686	0
GKC564	MIP-1	WT	6	minus4	1.53664	-0.565219
GKC564	MIP-1	WT	6	minus4	3.76769	0.613122
GKC564	MIP-1	WT	6	minus4	1.29058	-0.527469
GKC564	MIP-1	WT	6	minus4	3.20061	1.05395
GKC564	MIP-1	WT	6	minus4	2.09145	1.04655
GKC564	MIP-1	WT	6	minus4	3.26269	0.593961
GKC564	MIP-1	WT	6	minus4	4.33005	0.368359
GKC564	MIP-1	WT	6	minus4	4.93966	-0.729542
GKC564	MIP-1	WT	6	minus4	1.11511	-0.572849
GKC564	MIP-1	WT	6	minus4	3.48271	0.489793
GKC564	MIP-1	WT	6	minus4	3.37674	-0.104188
GKC564	MIP-1	WT	6	minus4	3.56674	-0.164735
GKC564	MIP-1	WT	6	minus4	5.24491	-0.032947
GKC564	MIP-1	WT	6	minus4	2.87378	0.032947
GKC564	MIP-1	WT	6	minus4	6.54516	0.363912
GKC564	MIP-1	WT	6	minus4	1.58591	0.990605
GKC564	MIP-1	WT	6	minus4	3.21565	0.362417
GKC564	MIP-1	WT	6	minus4	3.23493	-0.237584
GKC564	MIP-1	WT	6	minus4	1.64645	0.104188
GKC564	MIP-1	WT	6	minus4	2.11533	0.0658941
GKC564	MIP-1	WT	6	minus4	5.28348	4.26648
GKC564	MIP-1	WT	6	minus4	1.66141	1.35724
GKC564	MIP-1	WT	6	minus4	4.42751	0.210964
GKC564	MIP-1	WT	6	minus4	6.41364	1.04982
GKC564	MIP-1	WT	6	minus4	3.01728	0.85428
GKC564	MIP-1	WT	6	minus4	3.64174	-0.177425
GKC564	MIP-1	WT	6	minus4	1.25991	0.104188
GKC564	MIP-1	WT	6	minus4	2.9145	-0.131788
GKC564	MIP-1	WT	6	minus4	4.46583	4.3727
GKC564	MIP-1	WT	6	minus4	4.90497	0.589374
GKC564	MIP-1	WT	6	minus4	1.06349	4.11063
GKC564	MIP-1	WT	6	minus4	1.37065	0.618411
GKC564	MIP-1	WT	6	minus4	1.70884	-0.135844
GKC564	MIP-1	WT	6	minus4	2.52474	0.501084
GKC564	MIP-1	WT	6	minus4	2.69388	-0.428311
GKC564	MIP-1	WT	6	minus4	0.765367	3.92199
GKC564	MIP-1	WT	6	minus4	2.06476	0.652573
GKC564	MIP-1	WT	6	minus4	1.51795	0.535637
GKC564	MIP-1	WT	6	minus4	0.63663	5.03161
GKC564	MIP-1	WT	6	minus4	3.67594	0.727307
GKC564	MIP-1	WT	6	minus4	1.45483	0.903078
GKC564	MIP-1	WT	6	minus4	1.04098	-0.479716
GKC564	MIP-1	WT	6	minus4	3.36416	-0.294687
GKC564	MIP-1	WT	6	minus4	4.59599	1.14617
GKC564	MIP-1	WT	6	minus4	1.7206	1.01935
GKC564	MIP-1	WT	6	minus4	3.44342	0.803872
GKC564	MIP-1	WT	6	minus4	6.87642	0.898861
GKC564	MIP-1	WT	6	minus4	1.44204	1.53521
GKC564	MIP-1	WT	6	minus4	0.541334	1.9274
GKC564	MIP-1	WT	6	minus4	2.0298	1.56134
GKC564	MIP-1	WT	6	minus4	0.592448	1.70491
GKC564	MIP-1	WT	6	minus4	0.493175	1.51333
GKC564	MIP-1	WT	6	minus4	1.40332	1.7187
GKC564	MIP-1	WT	6	minus4	1.08206	1.27868
GKC564	MIP-1	WT	6	minus4	1.01058	0.50861
GKC564	MIP-1	WT	6	minus4	3.1118	0.65837
GKC564	MIP-1	WT	6	minus4	2.75682	0.621038
GKC564	MIP-1	WT	6	minus4	1.13097	2.80916
GKC564	MIP-1	WT	6	minus4	7.15967	4.99209
GKC564	MIP-1	WT	7	minus4	2.15483	-0.917388
GKC564	MIP-1	WT	7	minus4	2.15746	-0.335995
GKC564	MIP-1	WT	7	minus4	1.37721	-1.13908
GKC564	MIP-1	WT	7	minus4	1.22539	-0.792996
GKC564	MIP-1	WT	7	minus4	0.70706	-0.509676
GKC564	MIP-1	WT	7	minus4	4.32079	-0.457715
GKC564	MIP-1	WT	7	minus4	4.82472	0.532276
GKC564	MIP-1	WT	7	minus4	1.80752	-0.47173
GKC564	MIP-1	WT	7	minus4	0.660522	0.505398
GKC564	MIP-1	WT	7	minus4	0.991351	0.596066
GKC564	MIP-1	WT	7	minus4	4.05184	0.296523
GKC564	MIP-1	WT	7	minus4	0.493175	2.36697
GKC564	MIP-1	WT	7	minus4	0.842625	0.192113
GKC564	MIP-1	WT	7	minus4	1.27699	-0.294687
GKC564	MIP-1	WT	7	minus4	0.960186	-0.689772
GKC564	MIP-1	WT	7	minus4	0.932496	-0.0465941
GKC564	MIP-1	WT	7	minus4	3.31362	-0.139782
GKC564	MIP-1	WT	7	minus4	5.35689	-0.501834
GKC564	MIP-1	WT	7	minus4	5.46935	0.0931883
GKC564	MIP-1	WT	7	minus4	5.04643	-0.614007
GKC564	MIP-1	WT	7	minus4	2.28144	-1.02893
GKC564	MIP-1	WT	7	minus4	1.52107	-0.559428
GKC564	MIP-1	WT	7	minus4	1.06722	-0.0658941
GKC564	MIP-1	WT	7	minus4	2.30938	-0.55913
GKC564	MIP-1	WT	7	minus4	2.41454	-0.585037
GKC564	MIP-1	WT	7	minus4	2.74986	-1.00054
GKC564	MIP-1	WT	7	minus4	2.08613	-1.38661
GKC564	MIP-1	WT	7	minus4	2.58253	-1.3669
GKC564	MIP-1	WT	7	minus4	2.4834	-0.755851
GKC564	MIP-1	WT	7	minus4	1.73815	-1.14238
GKC564	MIP-1	WT	7	minus4	1.80179	-1.2377
GKC564	MIP-1	WT	7	minus4	3.47032	-1.33881
GKC564	MIP-1	WT	7	minus4	2.09677	-0.514649
GKC564	MIP-1	WT	7	minus4	2.14696	9.52565
GKC564	MIP-1	WT	7	minus4	5.77287	-0.632892
GKC564	MIP-1	WT	7	minus4	7.07168	-0.745506
GKC564	MIP-1	WT	7	minus4	2.38224	-0.792996
GKC564	MIP-1	WT	7	minus4	5.60021	-1.0493
GKC564	MIP-1	WT	7	minus4	2.61595	-0.486457
GKC564	MIP-1	WT	7	minus4	4.14309	1.11841
GKC564	MIP-1	WT	7	minus4	1.10048	0.47173
GKC564	MIP-1	WT	7	minus4	1.98635	0.250917
GKC564	MIP-1	WT	7	minus4	1.8896	-0.527469
GKC564	MIP-1	WT	7	minus4	1.24271	2.08642
GKC564	MIP-1	WT	7	minus4	8.89231	3.78891
GKC564	MIP-1	WT	7	minus4	1.13097	3.08389
GKC564	MIP-1	WT	7	minus4	1.02584	2.58655
GKC564	MIP-1	WT	7	minus4	2.09943	-1.12466
GKC564	MIP-1	WT	7	minus4	2.45155	-0.257325
GKC564	MIP-1	WT	7	minus4	1.60115	-0.531255
GKC564	MIP-1	WT	7	minus4	2.55371	-1.33678
GKC564	MIP-1	WT	7	minus4	4.36327	2.01651
GKC564	MIP-1	WT	7	minus4	1.22886	-1.00703
GKC564	MIP-1	WT	7	minus4	2.2302	-1
GKC564	MIP-1	WT	7	minus4	2.15746	-1.10421
GKC564	MIP-1	WT	7	minus4	1.32089	-1.06674
GKC564	MIP-1	WT	7	minus4	2.15221	-0.729542
GKC564	MIP-1	WT	7	minus4	0.916487	-0.970293
GKC564	MIP-1	WT	7	minus4	1.53974	-0.50861
GKC564	MIP-1	WT	7	minus4	1.02963	-0.716026
GKC564	MIP-1	WT	7	minus4	3.38092	1.03943
GKC564	MIP-1	WT	7	minus4	2.00541	0.32947
GKC564	MIP-1	WT	7	minus4	3.22208	-0.442031
GKC564	MIP-1	WT	7	minus4	1.48024	-0.0736718
GKC564	MIP-1	WT	7	minus4	1.15484	-0.923105
GKC564	MIP-1	WT	7	minus4	1.18685	0.35485
GKC564	MIP-1	WT	7	minus4	1.62237	0.257325
GKC564	MIP-1	WT	7	minus4	1.63142	0.50861
GKC564	MIP-1	WT	8	minus4	5.37848	9.22297
GKC564	MIP-1	WT	8	minus4	0.498639	7.87606
GKC564	MIP-1	WT	8	minus4	5.93509	5.54861
GKC564	MIP-1	WT	8	minus4	7.15536	6.70194
GKC564	MIP-1	WT	8	minus4	4.1714	6.62309
GKC564	MIP-1	WT	8	minus4	0.800164	6.10489
GKC564	MIP-1	WT	8	minus4	2.72194	6.02038
GKC564	MIP-1	WT	8	minus4	0.995212	5.94134
GKC564	MIP-1	WT	8	minus4	1.25305	4.38554
GKC564	MIP-1	WT	8	minus4	0.498639	5.32856
GKC564	MIP-1	WT	8	minus4	2.74522	2.96482
GKC564	MIP-1	WT	8	minus4	1.2838	0.83305
GKC564	MIP-1	WT	8	minus4	0.45403	4.34661
GKC564	MIP-1	WT	8	minus4	0.597437	3.53913
GKC564	MIP-1	WT	8	minus4	0.244934	3.20617
GKC564	MIP-1	WT	8	minus4	11.4632	8.61613
GKC564	MIP-1	WT	8	minus4	0.821531	9.28083
GKC564	MIP-1	WT	8	minus4	0.394954	8.70967
GKC564	MIP-1	WT	8	minus4	1.87838	0.559428
GKC564	MIP-1	WT	8	minus4	0.821531	5.9623
GKC564	MIP-1	WT	8	minus4	0.688634	6.03882
GKC564	MIP-1	WT	8	minus4	0.482154	9.28348
GKC564	MIP-1	WT	8	minus4	8.4029	3.23273
GKC564	MIP-1	WT	8	minus4	5.191	6.72074
GKC564	MIP-1	WT	8	minus4	3.32629	-0.104188
GKC564	MIP-1	WT	8	minus4	1.87276	0.265627
GKC564	MIP-1	WT	8	minus4	1.88399	-0.303757
GKC564	MIP-1	WT	8	minus4	0.4483	6.79971
GKC564	MIP-1	WT	8	minus4	1.2838	3.46402
GKC564	MIP-1	WT	8	minus4	2.64205	11.2257
GKC564	MIP-1	WT	8	minus4	1.4612	8.52204
GKC564	MIP-1	WT	8	minus4	1.16199	3.99583
GKC564	MIP-1	WT	8	minus4	1.13097	8.65008
GKC564	MIP-1	WT	8	minus4	1.13097	11.3153
GKC564	MIP-1	WT	8	minus4	1.13097	13.1102
GKC564	MIP-1	WT	8	minus4	1.13097	14.8064
GKC564	MIP-1	WT	8	minus4	2.69622	4.1076
GKC564	MIP-1	WT	8	minus4	5.54315	3.09322
GKC564	MIP-1	WT	8	minus4	3.62155	1.62279
GKC564	MIP-1	WT	8	minus4	4.00967	-0.792996
GKC564	MIP-1	WT	8	minus4	4.94658	-0.2815
GKC564	MIP-1	WT	8	minus4	7.88373	0.978477
GKC564	MIP-1	WT	8	minus4	5.50221	-0.232971
GKC564	MIP-1	WT	8	minus4	2.29416	-0.960563
GKC564	MIP-1	WT	8	minus4	5.57416	3.19586
GKC564	MIP-1	WT	8	minus4	5.81603	3.73974
GKC564	MIP-1	WT	8	minus4	3.30304	8.18739
GKC564	MIP-1	WT	8	minus4	7.18123	0.118792
GKC564	MIP-1	WT	8	minus4	2.45892	3.40823
GKC564	MIP-1	WT	8	minus4	2.2967	5.67286
GKC564	MIP-1	WT	8	minus4	2.97058	1.63678
GKC564	MIP-1	WT	8	minus4	5.82879	1.77282
GKC564	MIP-1	WT	8	minus4	1.58897	0.164735
GKC564	MIP-1	WT	8	minus4	2.28653	6.05037
GKC564	MIP-1	WT	8	minus4	2.89418	0.81573
GKC564	MIP-1	WT	8	minus4	5.84631	-0.398101
GKC564	MIP-1	WT	8	minus4	3.26695	0.776395
GKC564	MIP-1	WT	8	minus4	1.79318	5.68766
GKC564	MIP-1	WT	8	minus4	3.70998	0.613122
GKC564	MIP-1	WT	8	minus4	3.99236	1.7244
GKC564	MIP-1	WT	8	minus4	3.11399	0.265627
GKC564	MIP-1	WT	8	minus4	1.68817	2.88589
GKC564	MIP-1	WT	8	minus4	1.53042	1.23905
GKC564	MIP-1	WT	8	minus4	2.45401	1.68234
GKC564	MIP-1	WT	8	minus4	7.48814	1.75735
GKC564	MIP-1	WT	8	minus4	2.97504	0.760642
GKC564	MIP-1	WT	8	minus4	1.64345	-0.33921
GKC564	MIP-1	WT	8	minus4	3.07461	1.09387
GKC564	MIP-1	WT	8	minus4	4.12984	1.7831
GKC564	MIP-1	WT	8	minus4	1.98908	3.82526
GKC564	MIP-1	WT	8	minus4	2.25333	2.22491
GKC564	MIP-1	WT	8	minus4	2.33967	3.99058
GKC564	MIP-1	WT	8	minus4	2.44171	2.17832
GKC564	MIP-1	WT	8	minus4	2.17576	0.566178
GKC564	MIP-1	WT	8	minus4	6.6351	0.708405
GKC564	MIP-1	WT	8	minus4	3.89548	0.310822
GKC564	MIP-1	WT	8	minus4	2.53683	0.505398
GKC564	MIP-1	WT	8	minus4	2.8987	-0.419347
GKC564	MIP-1	WT	8	minus4	1.54593	-0.751308
GKC564	MIP-1	WT	8	minus4	1.48024	-0.625126
GKC564	MIP-1	WT	8	minus4	1.14047	-0.0988411
GKC564	MIP-1	WT	8	minus4	1.77878	0.687407
GKC564	MIP-1	WT	8	minus4	2.64442	0.5
GKC564	MIP-1	WT	8	minus4	1.36736	0.542684
GKC564	MIP-1	WT	8	minus4	4.51305	1.05755
GKC564	MIP-1	WT	8	minus4	3.13141	0.551612
GKC564	MIP-1	WT	8	minus4	2.96164	1.52851
GKC564	MIP-1	WT	8	minus4	5.73758	0.495303
GKC564	MIP-1	WT	8	minus4	1.38703	1.55387
GKC564	MIP-1	WT	8	minus4	1.5706	1.94059
GKC564	MIP-1	WT	8	minus4	4.46765	0.326159
GKC564	MIP-1	WT	8	minus4	1.7059	3.42431
GKC564	MIP-1	WT	8	minus4	0.859311	2.40994
GKC564	MIP-1	WT	8	minus4	1.05226	3.03009
GKC564	MIP-1	WT	8	minus4	2.00541	5.20044
GKC564	MIP-1	WT	9	minus4	2.93475	4.40031
GKC564	MIP-1	WT	9	minus4	8.65588	2.94835
GKC564	MIP-1	WT	9	minus4	0.631798	13.2587
GKC564	MIP-1	WT	9	minus4	3.13793	-2.67756
GKC564	MIP-1	WT	9	minus4	6.42276	-3.5179
GKC564	MIP-1	WT	9	minus4	1.87276	2.23047
GKC564	MIP-1	WT	9	minus4	4.53476	-2.79818
GKC564	MIP-1	WT	9	minus4	1.99725	2.55598
GKC564	MIP-1	WT	9	minus4	2.04597	2.65495
GKC564	MIP-1	WT	9	minus4	1.60723	-3.92408
GKC564	MIP-1	WT	9	minus4	0.607354	4.15315
GKC564	MIP-1	WT	9	minus4	0.912463	9.79053
GKC564	MIP-1	WT	9	minus4	1.32423	11.6958
GKC564	MIP-1	WT	9	minus4	5.62781	-4.847
GKC564	MIP-1	WT	9	minus4	1.02963	12.1675
GKC564	MIP-1	WT	9	minus4	1.18685	9.44411
GKC564	MIP-1	WT	9	minus4	2.14434	3.35465
GKC564	MIP-1	WT	9	minus4	3.26482	3.71175
GKC564	MIP-1	WT	9	minus4	3.78947	4.78256
GKC564	MIP-1	WT	9	minus4	4.2688	3.73467
GKC564	MIP-1	WT	9	minus4	3.06363	3.63837
GKC564	MIP-1	WT	9	minus4	3.90327	-4.56292
GKC564	MIP-1	WT	9	minus4	3.48065	-2.95658
GKC564	MIP-1	WT	9	minus4	1.02963	12.1638
GKC564	MIP-1	WT	9	minus4	13.4145	-2.98554
GKC564	MIP-1	WT	9	minus4	3.32629	-2.34017
GKC564	MIP-1	WT	9	minus4	2.93699	-3.78697
GKC564	MIP-1	WT	9	minus4	1.27699	-1.7305
GKC564	MIP-1	WT	9	minus4	1.59811	-1.70444
GKC564	MIP-1	WT	9	minus4	3.39973	4.13367
GKC564	MIP-1	WT	9	minus4	1.27699	7.67033
GKC564	MIP-1	WT	9	minus4	1.7	8.96112
GKC564	MIP-1	WT	9	minus4	5.1419	-2.21694
GKC564	MIP-1	WT	9	minus4	1.7903	-3.95864
GKC564	MIP-1	WT	9	minus4	3.38511	-4.17163
GKC564	MIP-1	WT	9	minus4	2.90096	-4.33003
GKC564	MIP-1	WT	9	minus4	6.77627	-5.32725
GKC564	MIP-1	WT	9	minus4	2.68919	-4.05905
GKC564	MIP-1	WT	9	minus4	4.43482	-4.23457
GKC564	MIP-1	WT	9	minus4	3.45585	-4.58729
GKC564	MIP-1	WT	9	minus4	1.17268	8.79587
GKC564	MIP-1	WT	9	minus4	2.69622	-3.25922
GKC564	MIP-1	WT	9	minus4	3.28608	-2.49873
GKC564	MIP-1	WT	9	minus4	1.93413	-2.79615
GKC564	MIP-1	WT	9	minus4	1.59811	5.07035
GKC564	MIP-1	WT	9	minus4	3.48271	-3.48742
GKC564	MIP-1	WT	9	minus4	2.88512	-2.51232
GKC564	MIP-1	WT	9	minus4	2.05403	4.0769
GKC564	MIP-1	WT	9	minus4	3.16827	-2.38887
GKC564	MIP-1	WT	9	minus4	2.0298	-2.5359
GKC564	MIP-1	WT	9	minus4	2.40711	3.61258
GKC564	MIP-1	WT	9	minus4	2.05135	-2.53107
GKC564	MIP-1	WT	9	minus4	5.02757	-4.50791
GKC564	MIP-1	WT	9	minus4	8.32573	3.68491
GKC564	MIP-1	WT	9	minus4	6.01852	3.95002
GKC564	MIP-1	WT	9	minus4	4.43117	3.45256
GKC564	MIP-1	WT	9	minus4	1.27699	8.78342
GKC564	MIP-1	WT	9	minus4	1.29735	2.51232
GKC564	MIP-1	WT	9	minus4	2.58253	5.47709
GKC564	MIP-1	WT	9	minus4	1.66738	2.55765
GKC564	MIP-1	WT	9	minus4	2.60642	4.61269
GKC564	MIP-1	WT	9	minus4	3.15961	-3.95663
GKC564	MIP-1	WT	9	minus4	5.59695	-4.33272
GKC564	MIP-1	WT	9	minus4	1.4834	7.56165
GKC564	MIP-1	WT	9	minus4	3.3872	5.24109
GKC564	MIP-1	WT	9	minus4	1.46438	-2.91347
GKC564	MIP-1	WT	9	minus4	1.59507	7.55232
GKC564	MIP-1	WT	9	minus4	2.12326	2.6297
GKC564	MIP-1	WT	9	minus4	4.84921	5.11226
GKC564	MIP-1	WT	9	minus4	1.78455	-2.45276
GKC564	MIP-1	WT	9	minus4	1.38703	-2.34903
GKC564	MIP-1	WT	9	minus4	1.27359	4.82133
GKC564	MIP-1	WT	9	minus4	0.956255	5.19983
GKC564	MIP-1	WT	9	minus4	2.36226	4.98689
GKC564	MIP-1	WT	9	minus4	2.12854	3.73846
GKC564	MIP-1	WT	9	minus4	2.5921	3.83634
GKC564	MIP-1	WT	9	minus4	1.64645	3.40568
GKC564	MIP-1	WT	9	minus4	1.27699	4.26963
GKC564	MIP-1	WT	10	minus4	2.37226	2.25977
GKC564	MIP-1	WT	10	minus4	0.734259	2.60532
GKC564	MIP-1	WT	10	minus4	0.850988	7.65558
GKC564	MIP-1	WT	10	minus4	1.49601	7.67647
GKC564	MIP-1	WT	10	minus4	1.36077	5.01112
GKC564	MIP-1	WT	10	minus4	2.81904	8.31531
GKC564	MIP-1	WT	10	minus4	4.92233	0.819916
GKC564	MIP-1	WT	10	minus4	6.794	-0.792996
GKC564	MIP-1	WT	10	minus4	4.33559	-1.43508
GKC564	MIP-1	WT	10	minus4	1.86713	0.952225
GKC564	MIP-1	WT	10	minus4	1.04851	5.54845
GKC564	MIP-1	WT	10	minus4	0.800164	5.57509
GKC564	MIP-1	WT	10	minus4	3.3284	-0.827821
GKC564	MIP-1	WT	10	minus4	0.983606	-0.941333
GKC564	MIP-1	WT	10	minus4	1.03342	-1.52635
GKC564	MIP-1	WT	10	minus4	4.76673	-0.5
GKC564	MIP-1	WT	10	minus4	2.28144	-0.965808
GKC564	MIP-1	WT	10	minus4	2.89418	-1.54395
GKC564	MIP-1	WT	10	minus4	2.10208	-1.36212
GKC564	MIP-1	WT	10	minus4	3.32629	-1.43091
GKC564	MIP-1	WT	10	minus4	5.42814	-0.652573
GKC564	MIP-1	WT	10	minus4	4.0327	-1.18711
GKC564	MIP-1	WT	10	minus4	1.12964	7.61
GKC564	MIP-1	WT	10	minus4	2.02168	-0.239858
GKC564	MIP-1	WT	10	minus4	3.0768	5.54248
GKC564	MIP-1	WT	10	minus4	4.69242	4.85869
GKC564	MIP-1	WT	10	minus4	2.70559	0.621038
GKC564	MIP-1	WT	10	minus4	0.711629	7.7563
GKC564	MIP-1	WT	10	minus4	4.9863	7.17844
GKC564	MIP-1	WT	10	minus4	7.41483	0.362417
GKC564	MIP-1	WT	10	minus4	1.93136	1.32537
GKC564	MIP-1	WT	10	minus4	6.68133	-0.531255
GKC564	MIP-1	WT	10	minus4	3.06143	-1.29934
GKC564	MIP-1	WT	10	minus4	2.46627	-2.04331
GKC564	MIP-1	WT	10	minus4	2.07011	-0.86482
GKC564	MIP-1	WT	10	minus4	6.77923	-1.10753
GKC564	MIP-1	WT	10	minus4	1.83887	-1.71602
GKC564	MIP-1	WT	10	minus4	1.74399	-1.24647
GKC564	MIP-1	WT	10	minus4	4.08046	0.265627
GKC564	MIP-1	WT	10	minus4	2.83049	0.0465941
GKC564	MIP-1	WT	10	minus4	1.89799	-0.164735
GKC564	MIP-1	WT	10	minus4	4.91018	1.7266
GKC564	MIP-1	WT	10	minus4	4.38535	1.07318
GKC564	MIP-1	WT	10	minus4	3.43927	-0.237584
GKC564	MIP-1	WT	10	minus4	4.06903	-0.0736718
GKC564	MIP-1	WT	10	minus4	1.77011	0.512536
GKC564	MIP-1	WT	10	minus4	5.80486	-1.03468
GKC564	MIP-1	WT	10	minus4	2.13381	-1.02523
GKC564	MIP-1	WT	10	minus4	5.5186	0.104188
GKC564	MIP-1	WT	10	minus4	3.28396	-0.623654
GKC564	MIP-1	WT	10	minus4	1.41952	-0.2815
GKC564	MIP-1	WT	10	minus4	3.95955	-0.745002
GKC564	MIP-1	WT	10	minus4	1.8417	-0.51074
GKC564	MIP-1	WT	10	minus4	0.995212	3.40196
GKC564	MIP-1	WT	10	minus4	3.41641	0.652573
GKC564	MIP-1	WT	10	minus4	12.9331	-0.613122
GKC564	MIP-1	WT	10	minus4	2.38224	-0.372753
GKC564	MIP-1	WT	10	minus4	1.94242	0.384225
GKC564	MIP-1	WT	10	minus4	7.80955	1.13751
GKC564	MIP-1	WT	10	minus4	4.21649	0.692672
GKC564	MIP-1	WT	10	minus4	2.60642	2.31834
GKC564	MIP-1	WT	10	minus4	3.20921	-0.265627
GKC564	MIP-1	WT	10	minus4	0.912463	2.30684
GKC564	MIP-1	WT	10	minus4	2.05672	4.66035
GKC564	MIP-1	WT	10	minus4	5.40003	0.032947
GKC564	MIP-1	WT	10	minus4	1.83319	-1.6803
GKC564	MIP-1	WT	10	minus4	2.35975	-1.28662
GKC564	MIP-1	WT	10	minus4	5.92561	-1.19716
GKC564	MIP-1	WT	10	minus4	3.40808	-1.0804
GKC564	MIP-1	WT	10	minus4	1.27359	4.44308
GKC564	MIP-1	WT	10	minus4	1.21843	7.15231
GKC564	MIP-1	WT	10	minus4	2.14171	-0.767961
GKC564	MIP-1	WT	10	minus4	1.02584	-1.06216
GKC564	MIP-1	WT	10	minus4	3.68998	-0.515703
GKC564	MIP-1	WT	10	minus4	2.49803	-0.785431
GKC564	MIP-1	WT	10	minus4	3.76373	0.164735
GKC564	MIP-1	WT	10	minus4	5.88603	-0.356377
GKC564	MIP-1	WT	10	minus4	2.86015	-0.303757
GKC564	MIP-1	WT	10	minus4	2.57294	-0.375654
GKC564	MIP-1	WT	10	minus4	6.3817	-0.54537
GKC564	MIP-1	WT	10	minus4	7.97392	3.37446
GKC564	MIP-1	WT	10	minus4	1.92582	3.38602
GKC564	MIP-1	WT	10	minus4	9.30816	4.6329
GKC564	MIP-1	WT	10	minus4	1.49601	-0.283421
GKC564	MIP-1	WT	10	minus4	6.10292	0.032947
GKC564	MIP-1	WT	10	minus4	0.892208	-0.50861
GKC564	MIP-1	WT	10	minus4	1.78166	-0.859348
GKC564	MIP-1	WT	10	minus4	2.50046	-0.526439
GKC564	MIP-1	WT	10	minus4	2.24307	0.582893
GKC564	MIP-1	WT	10	minus4	8.57065	-0.232971
GKC564	MIP-1	WT	10	minus4	4.74026	-0.164735
GKC564	MIP-1	WT	10	minus4	4.23895	1.32814
GKC564	MIP-1	WT	10	minus4	3.10962	0.9757
GKC564	MIP-1	WT	10	minus4	1.41952	0.565219
GKC564	MIP-1	WT	10	minus4	1.07094	0.0931883
GKC564	MIP-1	WT	10	minus4	3.38511	-0.139782
GKC564	MIP-1	WT	10	minus4	4.24829	0.54667
GKC564	MIP-1	WT	10	minus4	1.97541	-0.931883
GKC564	MIP-1	WT	10	minus4	5.93035	0.239858
GKC564	MIP-1	WT	10	minus4	1.9617	0.623654
GKC564	MIP-1	WT	10	minus4	2.55853	-0.486457
GKC564	MIP-1	WT	10	minus4	1.56445	-0.50861
GKC564	MIP-1	WT	10	minus4	1.64045	0.797772
GKC564	MIP-1	WT	10	minus4	4.14876	0.164735
GKC564	MIP-1	WT	10	minus4	2.10208	0.400818
GKC564	MIP-1	WT	10	minus4	8.1999	1.34975
GKC564	MIP-1	WT	10	minus4	1.9617	3.31479
GKC564	MIP-1	WT	10	minus4	0.760963	2.17706
GKC564	MIP-1	WT	10	minus4	1.52419	3.74058
GKC564	MIP-1	WT	10	minus4	2.04058	3.03582
GKC564	MIP-1	WT	10	minus4	0.607354	1.68199
GKC564	MIP-1	WT	10	minus4	1.88399	1.06776
GKC564	MIP-1	WT	10	minus4	0.401054	0.47173
GKC564	MIP-1	WT	10	minus4	2.59688	0.32947
GKC564	MIP-1	WT	10	minus4	3.94213	-0.656465
GKC564	MIP-1	WT	10	minus4	3.85638	-0.67199
GKC564	MIP-1	WT	10	minus4	1.7469	0.879326
GKC564	MIP-1	WT	10	minus4	2.49315	2.73008
GKC564	MIP-1	WT	10	minus4	2.5921	0.709171
GKC564	MIP-1	WT	10	minus4	1.14407	2.53205
GKC564	MIP-1	WT	1	minus5	0.612281	7.89401
GKC564	MIP-1	WT	1	minus5	0.324341	4.71671
GKC564	MIP-1	WT	1	minus5	3.88182	5.46571
GKC564	MIP-1	WT	1	minus5	2.04866	4.67534
GKC564	MIP-1	WT	1	minus5	1.92027	1.52635
GKC564	MIP-1	WT	1	minus5	0.344308	3.21681
GKC564	MIP-1	WT	1	minus5	0.370065	1.38308
GKC564	MIP-1	WT	1	minus5	0.117753	6.89429
GKC564	MIP-1	WT	1	minus5	0.117753	8.6644
GKC564	MIP-1	WT	1	minus5	0.465381	7.57318
GKC564	MIP-1	WT	1	minus5	0.879943	3.79152
GKC564	MIP-1	WT	1	minus5	1.7059	-0.164735
GKC564	MIP-1	WT	1	minus5	3.65987	3.09743
GKC564	MIP-1	WT	1	minus5	0.617189	0.2815
GKC564	MIP-1	WT	1	minus5	3.65584	6.32723
GKC564	MIP-1	WT	1	minus5	0.370065	4.53932
GKC564	MIP-1	WT	1	minus5	0.948368	2.8602
GKC564	MIP-1	WT	1	minus5	1.32758	-0.197682
GKC564	MIP-1	WT	1	minus5	0.572278	0.461258
GKC564	MIP-1	WT	1	minus5	0.825772	-0.257325
GKC564	MIP-1	WT	1	minus5	0.64624	0.363912
GKC564	MIP-1	WT	1	minus5	0.413117	4.1138
GKC564	MIP-1	WT	1	minus5	1.62237	1.68546
GKC564	MIP-1	WT	1	minus5	0.344308	1.2672
GKC564	MIP-1	WT	1	minus5	0.413117	-0.610461
GKC564	MIP-1	WT	1	minus5	0.782862	-1.41454
GKC564	MIP-1	WT	1	minus5	0.546552	-0.200409
GKC564	MIP-1	WT	1	minus5	1.27359	-0.783142
GKC564	MIP-1	WT	1	minus5	1.63744	-0.977922
GKC564	MIP-1	WT	1	minus5	0.752114	0.0931883
GKC564	MIP-1	WT	1	minus5	1.87276	2.41039
GKC564	MIP-1	WT	1	minus5	0.716184	-0.164735
GKC564	MIP-1	WT	1	minus5	0.971932	-0.2815
GKC564	MIP-1	WT	1	minus5	0.612281	-0.896256
GKC564	MIP-1	WT	1	minus5	0.401054	1.77649
GKC564	MIP-1	WT	1	minus5	1.54903	0.703021
GKC564	MIP-1	WT	1	minus5	2.72894	0.468265
GKC564	MIP-1	WT	1	minus5	0.388807	-0.279565
GKC564	MIP-1	WT	1	minus5	0.577353	-0.770783
GKC564	MIP-1	WT	1	minus5	1.10048	-0.769156
GKC564	MIP-1	WT	1	minus5	0.337718	-1.16732
GKC564	MIP-1	WT	1	minus5	0.795856	0.232971
GKC564	MIP-1	WT	1	minus5	0.838427	7.45579
GKC564	MIP-1	WT	1	minus5	0.665248	8.08917
GKC564	MIP-1	WT	1	minus5	0.785398	5.01382
GKC564	MIP-1	WT	1	minus5	0.971932	0.625126
GKC564	MIP-1	WT	1	minus5	1.14767	3.36501
GKC564	MIP-1	WT	1	minus5	0.48768	0.568754
GKC564	MIP-1	WT	1	minus5	0.641444	1.19929
GKC564	MIP-1	WT	1	minus5	1.35085	4.01768
GKC564	MIP-1	WT	1	minus5	0.413117	-0.395364
GKC564	MIP-1	WT	1	minus5	1.72646	0.887126
GKC564	MIP-1	WT	1	minus5	1.29058	6.34928
GKC564	MIP-1	WT	1	minus5	3.04381	3.7835
GKC564	MIP-1	WT	1	minus5	1.10415	3.83012
GKC564	MIP-1	WT	1	minus5	1.02963	3.7434
GKC564	MIP-1	WT	1	minus5	2.50532	0.899279
GKC564	MIP-1	WT	1	minus5	0.631798	0.937689
GKC564	MIP-1	WT	1	minus5	1.54593	0.712753
GKC564	MIP-1	WT	1	minus5	1.45163	-0.428311
GKC564	MIP-1	WT	1	minus5	0.536091	-1.5
GKC564	MIP-1	WT	1	minus5	2.26357	0.601227
GKC564	MIP-1	WT	1	minus5	3.29457	3.63826
GKC564	MIP-1	WT	1	minus5	0.660522	1.22495
GKC564	MIP-1	WT	1	minus5	0.720724	2.68459
GKC564	MIP-1	WT	1	minus5	0.106253	-1.0108
GKC564	MIP-1	WT	1	minus5	0.493175	1.16033
GKC564	MIP-1	WT	1	minus5	0.916487	6.36137
GKC564	MIP-1	WT	1	minus5	2.64442	1.06353
GKC564	MIP-1	WT	1	minus5	0.765367	0.652318
GKC564	MIP-1	WT	1	minus5	0.357302	-0.585037
GKC564	MIP-1	WT	1	minus5	0.310682	0.032947
GKC564	MIP-1	WT	1	minus5	0.562058	0.751308
GKC564	MIP-1	WT	1	minus5	0.4483	0.032947
GKC564	MIP-1	WT	1	minus5	0.363711	0.398101
GKC564	MIP-1	WT	1	minus5	0.756545	-0.164735
GKC564	MIP-1	WT	1	minus5	0.331063	0.663046
GKC564	MIP-1	WT	1	minus5	0.651018	-0.0658941
GKC564	MIP-1	WT	1	minus5	0.465381	0.350232
GKC564	MIP-1	WT	1	minus5	0.419082	-0.0988411
GKC564	MIP-1	WT	1	minus5	0.541334	-0.494206
GKC564	MIP-1	WT	1	minus5	0.370065	0.755851
GKC564	MIP-1	WT	1	minus5	0.791537	-0.55913
GKC564	MIP-1	WT	1	minus5	1.04098	-0.513918
GKC564	MIP-1	WT	1	minus5	0.296716	0.809255
GKC564	MIP-1	WT	1	minus5	0.18692	-0.598791
GKC564	MIP-1	WT	1	minus5	1.81609	6.54107
GKC564	MIP-1	WT	1	minus5	1.92304	7.62893
GKC564	MIP-1	WT	1	minus5	5.12492	2.48368
GKC564	MIP-1	WT	1	minus5	1.97815	2.24179
GKC564	MIP-1	WT	1	minus5	0.296716	4.6015
GKC564	MIP-1	WT	1	minus5	0.536091	2.49241
GKC564	MIP-1	WT	1	minus5	0.655779	1.65221
GKC564	MIP-1	WT	1	minus5	0.702477	3.4387
GKC564	MIP-1	WT	1	minus5	0.525528	4.02807
GKC564	MIP-1	WT	1	minus5	2.88965	4.33461
GKC564	MIP-1	WT	1	minus5	0.863457	3.86576
GKC564	MIP-1	WT	1	minus5	1.16199	0.296523
GKC564	MIP-1	WT	1	minus5	2.28399	1.02201
GKC564	MIP-1	WT	1	minus5	0.289609	3.57817
GKC564	MIP-1	WT	1	minus5	0.21275	1.00703
GKC564	MIP-1	WT	2	minus5	1.83603	1.71049
GKC564	MIP-1	WT	2	minus5	2.88512	0.118792
GKC564	MIP-1	WT	2	minus5	5.58556	0.468265
GKC564	MIP-1	WT	2	minus5	2.71494	0.0736718
GKC564	MIP-1	WT	2	minus5	1.40981	-0.526439
GKC564	MIP-1	WT	2	minus5	6.45157	-0.164735
GKC564	MIP-1	WT	2	minus5	0.530823	-0.931479
GKC564	MIP-1	WT	2	minus5	0.683989	-1.33112
GKC564	MIP-1	WT	2	minus5	1.33425	-1.02523
GKC564	MIP-1	WT	2	minus5	6.50902	-0.617532
GKC564	MIP-1	WT	2	minus5	1.08206	-0.542684
GKC564	MIP-1	WT	2	minus5	2.35223	-0.538669
GKC564	MIP-1	WT	2	minus5	2.02168	-0.439568
GKC564	MIP-1	WT	2	minus5	3.93437	0.551612
GKC564	MIP-1	WT	2	minus5	0.641444	4.62883
GKC564	MIP-1	WT	2	minus5	1.77301	0.298348
GKC564	MIP-1	WT	2	minus5	2.79377	-0.0736718
GKC564	MIP-1	WT	2	minus5	5.02928	0.582893
GKC564	MIP-1	WT	2	minus5	2.12854	0.0931883
GKC564	MIP-1	WT	2	minus5	1.14047	-1.10322
GKC564	MIP-1	WT	2	minus5	1.33091	-0.517076
GKC564	MIP-1	WT	2	minus5	0.838427	0.494206
GKC564	MIP-1	WT	2	minus5	2.07278	1.32785
GKC564	MIP-1	WT	2	minus5	2.27889	1.94368
GKC564	MIP-1	WT	2	minus5	3.89352	-0.722585
GKC564	MIP-1	WT	2	minus5	3.1227	-0.296523
GKC564	MIP-1	WT	2	minus5	2.74986	-0.804339
GKC564	MIP-1	WT	2	minus5	4.60676	-0.625126
GKC564	MIP-1	WT	2	minus5	1.64645	-0.398101
GKC564	MIP-1	WT	2	minus5	1.46438	0.164735
GKC564	MIP-1	WT	2	minus5	5.31357	0.575395
GKC564	MIP-1	WT	2	minus5	1.32423	0.826307
GKC564	MIP-1	WT	2	minus5	2.55612	1.75032
GKC564	MIP-1	WT	2	minus5	5.42979	5.71123
GKC564	MIP-1	WT	2	minus5	7.55968	4.82213
GKC564	MIP-1	WT	2	minus5	11.9635	5.65571
GKC564	MIP-1	WT	2	minus5	4.88932	-0.566842
GKC564	MIP-1	WT	2	minus5	1.01058	-1.03943
GKC564	MIP-1	WT	2	minus5	2.81675	-0.604827
GKC564	MIP-1	WT	2	minus5	3.00398	-0.442031
GKC564	MIP-1	WT	2	minus5	2.19917	-0.192113
GKC564	MIP-1	WT	2	minus5	9.42259	0.515703
GKC564	MIP-1	WT	2	minus5	2.67744	2.56987
GKC564	MIP-1	WT	2	minus5	3.08776	-1.25122
GKC564	MIP-1	WT	2	minus5	1.84737	-0.615501
GKC564	MIP-1	WT	2	minus5	1.00675	-1.31261
GKC564	MIP-1	WT	2	minus5	2.40463	-0.531255
GKC564	MIP-1	WT	2	minus5	6.3573	-0.265627
GKC564	MIP-1	WT	2	minus5	3.10089	-0.0465941
GKC564	MIP-1	WT	2	minus5	2.09943	1.09521
GKC564	MIP-1	WT	2	minus5	2.07546	-1.02148
GKC564	MIP-1	WT	2	minus5	5.88127	-0.186377
GKC564	MIP-1	WT	2	minus5	2.6586	0.738416
GKC564	MIP-1	WT	2	minus5	5.82719	-0.596066
GKC564	MIP-1	WT	2	minus5	2.919	-0.681062
GKC564	MIP-1	WT	2	minus5	5.20113	2.065
GKC564	MIP-1	WT	2	minus5	1.30072	-1.07985
GKC564	MIP-1	WT	2	minus5	3.71397	-0.200409
GKC564	MIP-1	WT	2	minus5	3.29245	0.638278
GKC564	MIP-1	WT	2	minus5	1.33091	1.5702
GKC564	MIP-1	WT	2	minus5	2.98841	0.118792
GKC564	MIP-1	WT	2	minus5	9.61714	9.01456
GKC564	MIP-1	WT	2	minus5	1.66141	-0.0658941
GKC564	MIP-1	WT	2	minus5	1.26334	-0.680264
GKC564	MIP-1	WT	2	minus5	1.90636	-0.638278
GKC564	MIP-1	WT	2	minus5	6.61417	1.54368
GKC564	MIP-1	WT	2	minus5	5.96034	10.1681
GKC564	MIP-1	WT	2	minus5	3.3872	5.76552
GKC564	MIP-1	WT	3	minus5	3.44757	4.12018
GKC564	MIP-1	WT	3	minus5	0.562059	3.39893
GKC564	MIP-1	WT	3	minus5	0.350835	2.57802
GKC564	MIP-1	WT	3	minus5	0.252649	4.02901
GKC564	MIP-1	WT	3	minus5	0.96411	1.23375
GKC564	MIP-1	WT	3	minus5	0.541335	0.465942
GKC564	MIP-1	WT	3	minus5	0.317548	3.39344
GKC564	MIP-1	WT	3	minus5	0.855155	-0.0931883
GKC564	MIP-1	WT	3	minus5	0.401054	-0.776396
GKC564	MIP-1	WT	3	minus5	1.31083	-0.716026
GKC564	MIP-1	WT	3	minus5	0.582407	-0.0465942
GKC564	MIP-1	WT	3	minus5	0.50948	-0.164735
GKC564	MIP-1	WT	3	minus5	0.530823	-0.536339
GKC564	MIP-1	WT	3	minus5	1.98635	-0.232971
GKC564	MIP-1	WT	3	minus5	1.23926	0.541683
GKC564	MIP-1	WT	3	minus5	1.30746	-0.395365
GKC564	MIP-1	WT	3	minus5	2.2738	-1.73441
GKC564	MIP-1	WT	3	minus5	0.636631	-0.772892
GKC564	MIP-1	WT	3	minus5	0.968025	0.398101
GKC564	MIP-1	WT	3	minus5	0.514857	0.118792
GKC564	MIP-1	WT	3	minus5	1.08206	0.563
GKC564	MIP-1	WT	3	minus5	0.401054	2.2117
GKC564	MIP-1	WT	3	minus5	1.23233	-0.752973
GKC564	MIP-1	WT	3	minus5	2.42197	2.13402
GKC564	MIP-1	WT	3	minus5	3.67996	2.97808
GKC564	MIP-1	WT	3	minus5	0.344308	-0.177425
GKC564	MIP-1	WT	3	minus5	4.30227	0.419348
GKC564	MIP-1	WT	3	minus5	0.729762	0.739885
GKC564	MIP-1	WT	3	minus5	0.631799	-0.0329471
GKC564	MIP-1	WT	3	minus5	0.948369	-0.164735
GKC564	MIP-1	WT	3	minus5	1.32089	2.00526
GKC564	MIP-1	WT	3	minus5	0.425006	-1.62554
GKC564	MIP-1	WT	3	minus5	1.00291	-1.09089
GKC564	MIP-1	WT	3	minus5	4.03462	0.697596
GKC564	MIP-1	WT	3	minus5	1.37721	-0.917389
GKC564	MIP-1	WT	3	minus5	0.388807	1.53241
GKC564	MIP-1	WT	3	minus5	1.10048	3.27988
GKC564	MIP-1	WT	3	minus5	0.912464	5.81268
GKC564	MIP-1	WT	3	minus5	0.476596	-0.757286
GKC564	MIP-1	WT	4	minus5	0.413117	3.58047
GKC564	MIP-1	WT	4	minus5	1.9562	0.65837
GKC564	MIP-1	WT	4	minus5	1.7059	0.530547
GKC564	MIP-1	WT	4	minus5	2.26613	1.59897
GKC564	MIP-1	WT	4	minus5	2.94149	0.521258
GKC564	MIP-1	WT	4	minus5	1.74107	2.80095
GKC564	MIP-1	WT	4	minus5	2.79147	2.45344
GKC564	MIP-1	WT	4	minus5	3.68397	0.47173
GKC564	MIP-1	WT	4	minus5	1.01441	-0.200409
GKC564	MIP-1	WT	4	minus5	0.56718	0.817928
GKC564	MIP-1	WT	4	minus5	1.16199	1.93414
GKC564	MIP-1	WT	4	minus5	1.15842	-0.350232
GKC564	MIP-1	WT	4	minus5	2.82821	-0.797773
GKC564	MIP-1	WT	4	minus5	3.58912	0.0736719
GKC564	MIP-1	WT	4	minus5	0.71163	-0.343977
GKC564	MIP-1	WT	4	minus5	0.587439	6.33815
GKC564	MIP-1	WT	4	minus5	2.73127	3.85828
GKC564	MIP-1	WT	4	minus5	1.24961	5.00545
GKC564	MIP-1	WT	4	minus5	0.394954	0.677867
GKC564	MIP-1	WT	4	minus5	0.602406	4.85539
GKC564	MIP-1	WT	4	minus5	1.02963	3.29421
GKC564	MIP-1	WT	4	minus5	2.02169	0.615502
GKC564	MIP-1	WT	4	minus5	0.702477	0.879137
GKC564	MIP-1	WT	4	minus5	1.60419	0.458899
GKC564	MIP-1	WT	4	minus5	0.482154	0.554556
GKC564	MIP-1	WT	4	minus5	1.94242	0.559428
GKC564	MIP-1	WT	4	minus5	2.05135	-0.468266
GKC564	MIP-1	WT	4	minus5	2.532	-0.786812
GKC564	MIP-1	WT	4	minus5	0.76976	-1.31592
GKC564	MIP-1	WT	4	minus5	1.01441	-0.468266
GKC564	MIP-1	WT	4	minus5	1.00675	-1.00054
GKC564	MIP-1	WT	4	minus5	0.778508	-1.16868
GKC564	MIP-1	WT	4	minus5	5.03787	-1.14905
GKC564	MIP-1	WT	4	minus5	2.00813	-1.31054
GKC564	MIP-1	WT	4	minus5	1.66141	-0.186377
GKC564	MIP-1	WT	4	minus5	2.14434	0
GKC564	MIP-1	WT	4	minus5	1.21494	-1.62839
GKC564	MIP-1	WT	4	minus5	0.693264	-1.18943
GKC564	MIP-1	WT	4	minus5	1.49286	-0.104188
GKC564	MIP-1	WT	4	minus5	0.551745	0.250917
GKC564	MIP-1	WT	4	minus5	0.382611	0.0465942
GKC564	MIP-1	WT	4	minus5	0.442535	-1.57966
GKC564	MIP-1	WT	4	minus5	1.00675	-1.08986
GKC564	MIP-1	WT	4	minus5	1.08206	-0.501084
GKC564	MIP-1	WT	4	minus5	1.66141	-1.25641
GKC564	MIP-1	WT	4	minus5	1.93689	-0.633749
GKC564	MIP-1	WT	4	minus5	1.45163	-1.63637
GKC564	MIP-1	WT	4	minus5	0.195718	-1.01566
GKC564	MIP-1	WT	4	minus5	0.607354	-1.62037
GKC564	MIP-1	WT	4	minus5	1.03342	-0.303757
GKC564	MIP-1	WT	4	minus5	1.24271	0.329471
GKC564	MIP-1	WT	4	minus5	2.77302	-0.271688
GKC564	MIP-1	WT	4	minus5	0.641445	0.0329471
GKC564	MIP-1	WT	4	minus5	0.407108	7.0264
GKC564	MIP-1	WT	4	minus5	0.846812	4.08879
GKC564	MIP-1	WT	4	minus5	1.24616	-0.310822
GKC564	MIP-1	WT	4	minus5	2.90548	0.633749
GKC564	MIP-1	WT	4	minus5	0.0810864	11.3028
GKC564	MIP-1	WT	4	minus5	3.02171	7.72019
GKC564	MIP-1	WT	4	minus5	4.15065	2.90275
GKC564	MIP-1	WT	4	minus5	1.84737	1.8589
GKC564	MIP-1	WT	4	minus5	0.983608	5.33968
GKC564	MIP-1	WT	4	minus5	2.10474	5.9943
GKC564	MIP-1	WT	4	minus5	1.8417	-0.0931883
GKC564	MIP-1	WT	4	minus5	2.19398	0.343977
GKC564	MIP-1	WT	4	minus5	1.27359	7.32517
GKC564	MIP-1	WT	4	minus5	1.48024	9.34386
GKC564	MIP-1	WT	4	minus5	0.388807	4.96127
GKC564	MIP-1	WT	4	minus5	0.18692	9.67908
GKC564	MIP-1	WT	4	minus5	0.587439	14.2685
GKC564	MIP-1	WT	4	minus5	0.674652	9.91056
GKC564	MIP-1	WT	4	minus5	0.430889	-0.569047
GKC564	MIP-1	WT	4	minus5	0.530823	-0.501835
GKC564	MIP-1	WT	4	minus5	1.63142	-0.489793
GKC564	MIP-1	WT	4	minus5	0.808746	0.663047
GKC564	MIP-1	WT	4	minus5	1.11511	-0.294687
GKC564	MIP-1	WT	4	minus5	0.260249	0.232971
GKC564	MIP-1	WT	4	minus5	1.77878	-0.677867
GKC564	MIP-1	WT	4	minus5	1.25991	0.639716
GKC564	MIP-1	WT	4	minus5	0.536092	-0.419348
GKC564	MIP-1	WT	4	minus5	0.679329	-0.354851
GKC564	MIP-1	WT	4	minus5	1.35085	0.531255
GKC564	MIP-1	WT	4	minus5	0.407108	-0.363912
GKC564	MIP-1	WT	4	minus5	0.846812	4.53486
GKC564	MIP-1	WT	4	minus5	1.51483	4.11838
GKC564	MIP-1	WT	4	minus5	0.979724	0
GKC564	MIP-1	WT	4	minus5	1.48971	0.412825
GKC564	MIP-1	WT	4	minus5	1.14047	2.42155
GKC564	MIP-1	WT	4	minus5	1.69113	0.752752
GKC564	MIP-1	WT	4	minus5	0.879944	0.980864
GKC564	MIP-1	WT	4	minus5	3.61143	1.68491
GKC564	MIP-1	WT	4	minus5	1.14767	1.76145
GKC564	MIP-1	WT	4	minus5	0.795857	1.64085
GKC564	MIP-1	WT	4	minus5	1.00291	0.811934
GKC564	MIP-1	WT	4	minus5	0.83422	7.20014
GKC564	MIP-1	WT	4	minus5	1.8615	3.89403
GKC564	MIP-1	WT	4	minus5	2.56574	3.58503
GKC564	MIP-1	WT	4	minus5	2.26613	6.02474
GKC564	MIP-1	WT	5	minus5	2.13118	1.9799
GKC564	MIP-1	WT	5	minus5	0.370065	2.69023
GKC564	MIP-1	WT	5	minus5	0.752114	0.678667
GKC564	MIP-1	WT	5	minus5	0.888129	0.825195
GKC564	MIP-1	WT	5	minus5	4.74556	0.419347
GKC564	MIP-1	WT	5	minus5	1.13097	4.81007
GKC564	MIP-1	WT	5	minus5	6.19139	6.29667
GKC564	MIP-1	WT	5	minus5	3.70998	10.1699
GKC564	MIP-1	WT	5	minus5	2.89191	7.35592
GKC564	MIP-1	WT	5	minus5	2.42444	-0.65398
GKC564	MIP-1	WT	5	minus5	7.24713	0.513918
GKC564	MIP-1	WT	5	minus5	4.65325	-0.604827
GKC564	MIP-1	WT	5	minus5	2.93025	-0.792996
GKC564	MIP-1	WT	5	minus5	0.884041	-0.606894
GKC564	MIP-1	WT	5	minus5	8.91166	-0.530547
GKC564	MIP-1	WT	5	minus5	3.89157	-0.736718
GKC564	MIP-1	WT	5	minus5	5.82082	2.00146
GKC564	MIP-1	WT	5	minus5	1.2358	5.59317
GKC564	MIP-1	WT	5	minus5	3.77562	5.5505
GKC564	MIP-1	WT	5	minus5	2.72194	-0.877282
GKC564	MIP-1	WT	5	minus5	2.71027	-1.11208
GKC564	MIP-1	WT	5	minus5	2.7126	-1.09521
GKC564	MIP-1	WT	5	minus5	1.76722	-0.636313
GKC564	MIP-1	WT	5	minus5	4.25762	-1.02348
GKC564	MIP-1	WT	5	minus5	7.73778	-0.719574
GKC564	MIP-1	WT	5	minus5	3.86618	-1.03141
GKC564	MIP-1	WT	5	minus5	1.55521	-0.396735
GKC564	MIP-1	WT	5	minus5	4.06521	-0.0465941
GKC564	MIP-1	WT	5	minus5	2.37226	0.658941
GKC564	MIP-1	WT	5	minus5	7.36529	2.23125
GKC564	MIP-1	WT	5	minus5	1.7903	2.01874
GKC564	MIP-1	WT	5	minus5	2.3447	-0.232971
GKC564	MIP-1	WT	5	minus5	1.94242	0.298348
GKC564	MIP-1	WT	5	minus5	2.0027	4.44538
GKC564	MIP-1	WT	5	minus5	2.91675	1.90732
GKC564	MIP-1	WT	5	minus5	1.29058	4.75465
GKC564	MIP-1	WT	5	minus5	2.10208	0
GKC564	MIP-1	WT	5	minus5	2.14171	-0.520938
GKC564	MIP-1	WT	5	minus5	1.27699	1.39004
GKC564	MIP-1	WT	5	minus5	5.08916	1.75364
GKC564	MIP-1	WT	5	minus5	0.916487	-0.561068
GKC564	MIP-1	WT	5	minus5	1.02203	-0.200409
GKC564	MIP-1	WT	5	minus5	4.28741	0.809255
GKC564	MIP-1	WT	5	minus5	2.80068	0.866702
GKC564	MIP-1	WT	5	minus5	4.56363	-0.263576
GKC564	MIP-1	WT	5	minus5	1.61329	-0.589657
GKC564	MIP-1	WT	5	minus5	2.20954	-0.221015
GKC564	MIP-1	WT	5	minus5	2.15483	2.7904
GKC564	MIP-1	WT	5	minus5	1.38703	-0.412825
GKC564	MIP-1	WT	5	minus5	0.825772	-0.135844
GKC564	MIP-1	WT	5	minus5	0.337718	2.33465
GKC564	MIP-1	WT	5	minus5	0.244934	3.34356
GKC564	MIP-1	WT	5	minus5	2.83278	1.03415
GKC564	MIP-1	WT	5	minus5	1.11511	0.687407
GKC564	MIP-1	WT	6	minus5	0.734259	3.06208
GKC564	MIP-1	WT	6	minus5	0.471005	7.65123
GKC564	MIP-1	WT	6	minus5	0.834219	2.80306
GKC564	MIP-1	WT	6	minus5	3.81315	0.708405
GKC564	MIP-1	WT	6	minus5	0.282413	4.39555
GKC564	MIP-1	WT	6	minus5	0.875836	6.44734
GKC564	MIP-1	WT	6	minus5	1.02963	4.69299
GKC564	MIP-1	WT	6	minus5	3.35576	-0.0931883
GKC564	MIP-1	WT	6	minus5	2.3195	0.565219
GKC564	MIP-1	WT	6	minus5	0.582407	3.80053
GKC564	MIP-1	WT	6	minus5	2.64442	-0.164735
GKC564	MIP-1	WT	6	minus5	2.81446	0.368359
GKC564	MIP-1	WT	6	minus5	4.5492	-0.312563
GKC564	MIP-1	WT	6	minus5	2.96611	0.526439
GKC564	MIP-1	WT	6	minus5	3.81512	-0.33921
GKC564	MIP-1	WT	6	minus5	3.92078	0.186377
GKC564	MIP-1	WT	6	minus5	7.97801	0.479716
GKC564	MIP-1	WT	6	minus5	3.22208	-0.562331
GKC564	MIP-1	WT	6	minus5	1.14047	-0.738416
GKC564	MIP-1	WT	6	minus5	1.99725	-0.135844
GKC564	MIP-1	WT	6	minus5	2.69388	-0.428311
GKC564	MIP-1	WT	6	minus5	5.56111	4.04408
GKC564	MIP-1	WT	6	minus5	2.66567	-0.164735
GKC564	MIP-1	WT	6	minus5	8.02154	0.520938
GKC564	MIP-1	WT	6	minus5	2.18878	1.03141
GKC564	MIP-1	WT	6	minus5	3.48889	0.232971
GKC564	MIP-1	WT	6	minus5	1.74399	-0.512536
GKC564	MIP-1	WT	6	minus5	2.83049	0.35485
GKC564	MIP-1	WT	6	minus5	6.14491	-0.208375
GKC564	MIP-1	WT	6	minus5	2.94597	0.232971
GKC564	MIP-1	WT	6	minus5	1.79605	-0.428311
GKC564	MIP-1	WT	6	minus5	4.83522	-0.475169
GKC564	MIP-1	WT	6	minus5	3.06143	0.0465941
GKC564	MIP-1	WT	6	minus5	3.67995	0
GKC564	MIP-1	WT	6	minus5	3.18122	0.783142
GKC564	MIP-1	WT	6	minus5	3.84854	-0.118792
GKC564	MIP-1	WT	6	minus5	2.99064	1.05482
GKC564	MIP-1	WT	6	minus5	0.944413	0.164735
GKC564	MIP-1	WT	6	minus5	2.81446	-0.250917
GKC564	MIP-1	WT	6	minus5	3.60333	0.164735
GKC564	MIP-1	WT	6	minus5	2.86924	0.615501
GKC564	MIP-1	WT	6	minus5	1.22539	0.899279
GKC564	MIP-1	WT	6	minus5	1.74107	-0.0465941
GKC564	MIP-1	WT	6	minus5	1.37393	0.118792
GKC564	MIP-1	WT	6	minus5	1.52107	0.396735
GKC564	MIP-1	WT	6	minus5	0.999066	0.739884
GKC564	MIP-1	WT	6	minus5	2.50046	0.5601
GKC564	MIP-1	WT	6	minus5	3.45171	0.65837
GKC564	MIP-1	WT	6	minus5	5.76646	0.208375
GKC564	MIP-1	WT	6	minus5	2.61357	0.55913
GKC564	MIP-1	WT	6	minus5	2.02709	1.28126
GKC564	MIP-1	WT	6	minus5	3.0394	4.62191
GKC564	MIP-1	WT	6	minus5	5.09257	0.475169
GKC564	MIP-1	WT	6	minus5	4.01928	0.489793
GKC564	MIP-1	WT	6	minus5	0.795856	1.38233
GKC564	MIP-1	WT	6	minus5	2.09145	0.385635
GKC564	MIP-1	WT	6	minus5	1.80179	0.303757
GKC564	MIP-1	WT	6	minus5	5.50877	0.032947
GKC564	MIP-1	WT	6	minus5	4.73141	0.32947
GKC564	MIP-1	WT	6	minus5	1.2358	0.032947
GKC564	MIP-1	WT	6	minus5	2.48828	0.589657
GKC564	MIP-1	WT	6	minus5	1.50857	0.177425
GKC564	MIP-1	WT	6	minus5	2.43432	0.479716
GKC564	MIP-1	WT	6	minus5	1.07465	1.2672
GKC564	MIP-1	WT	6	minus5	3.26695	1.30809
GKC564	MIP-1	WT	6	minus5	3.90327	0.517076
GKC564	MIP-1	WT	6	minus5	5.06183	3.01447
GKC564	MIP-1	WT	6	minus5	6.73778	4.6838
GKC564	MIP-1	WT	6	minus5	2.02168	0.613122
GKC564	MIP-1	WT	6	minus5	1.94518	0.699926
GKC564	MIP-1	WT	6	minus5	2.03519	0.878709
GKC564	MIP-1	WT	6	minus5	0.791537	0.699926
GKC564	MIP-1	WT	6	minus5	1.30409	0.566178
GKC564	MIP-1	WT	6	minus5	3.90716	1.01722
GKC564	MIP-1	WT	6	minus5	4.71902	2.07625
GKC564	MIP-1	WT	6	minus5	1.85585	3.41471
GKC564	MIP-1	WT	6	minus5	1.13097	3.38729
GKC564	MIP-1	WT	6	minus5	3.61952	2.28686
GKC564	MIP-1	WT	6	minus5	1.5117	1.66497
GKC564	MIP-1	WT	7	minus5	3.23707	1.6392
GKC564	MIP-1	WT	7	minus5	5.39506	-0.75153
GKC564	MIP-1	WT	7	minus5	1.31754	-0.335995
GKC564	MIP-1	WT	7	minus5	4.33189	-0.566178
GKC564	MIP-1	WT	7	minus5	2.26357	-0.752973
GKC564	MIP-1	WT	7	minus5	0.760963	-0.640824
GKC564	MIP-1	WT	7	minus5	1.82465	0.232971
GKC564	MIP-1	WT	7	minus5	2.88965	-0.772892
GKC564	MIP-1	WT	7	minus5	2.44909	-0.689772
GKC564	MIP-1	WT	7	minus5	2.35223	-0.895837
GKC564	MIP-1	WT	7	minus5	1.13097	-1.22185
GKC564	MIP-1	WT	7	minus5	1.64045	-0.513918
GKC564	MIP-1	WT	7	minus5	0.842625	-0.917388
GKC564	MIP-1	WT	7	minus5	1.35747	-1.19385
GKC564	MIP-1	WT	7	minus5	1.40007	-0.396735
GKC564	MIP-1	WT	7	minus5	1.53042	-0.936709
GKC564	MIP-1	WT	7	minus5	3.18985	-0.501084
GKC564	MIP-1	WT	7	minus5	0.944413	-0.385635
GKC564	MIP-1	WT	7	minus5	3.58099	-0.513918
GKC564	MIP-1	WT	7	minus5	0.48768	-0.197682
GKC564	MIP-1	WT	7	minus5	4.23521	0.032947
GKC564	MIP-1	WT	7	minus5	5.8892	-0.541683
GKC564	MIP-1	WT	7	minus5	7.06734	-0.842766
GKC564	MIP-1	WT	7	minus5	2.40711	-1.2672
GKC564	MIP-1	WT	7	minus5	2.05403	-0.692912
GKC564	MIP-1	WT	7	minus5	1.98088	-0.032947
GKC564	MIP-1	WT	7	minus5	3.03498	0.104188
GKC564	MIP-1	WT	7	minus5	1.57673	0.324491
GKC564	MIP-1	WT	7	minus5	5.29185	-0.850459
GKC564	MIP-1	WT	7	minus5	4.70129	-0.929145
GKC564	MIP-1	WT	7	minus5	5.13511	-0.619018
GKC564	MIP-1	WT	7	minus5	4.22773	-0.980863
GKC564	MIP-1	WT	7	minus5	3.69998	-0.981417
GKC564	MIP-1	WT	7	minus5	2.37476	0
GKC564	MIP-1	WT	7	minus5	3.05262	0.303757
GKC564	MIP-1	WT	7	minus5	1.1939	0.186377
GKC564	MIP-1	WT	7	minus5	2.34972	-0.65837
GKC564	MIP-1	WT	7	minus5	1.36406	1.88526
[truncated: 4,693 more rows]
