# Supplementary material for: Novel LOTUS-domain proteins are organizational hubs that recruit C. elegans Vasa to germ granules
Source: eLife. 2021 Jul 5;10:e60833. doi: 10.7554/eLife.60833 (PMC8331183; doi:10.7554/eLife.60833)
Supplement: Figure 10—source data 1. [file elife-60833-fig10-data1.xlsx]

## Sheet: Figure_10C
Figure 10C: Quantification of GLH-1::GFP granule area and number, combining data from the -2, -3, and -4 oocytes. Units for Area: um^2.
Strain	Genetic_Background	Germline	Area	Oocyte
DUP64	WT	1	3.10642	minus2
DUP64	WT	1	1.35387	minus2
DUP64	WT	1	2.30363	minus2
DUP64	WT	1	2.38726	minus2
DUP64	WT	1	1.5247	minus2
DUP64	WT	1	3.93291	minus2
DUP64	WT	1	5.48125	minus2
DUP64	WT	1	1.79325	minus2
DUP64	WT	1	3.14987	minus2
DUP64	WT	1	4.86167	minus2
DUP64	WT	1	3.4805	minus2
DUP64	WT	1	2.06085	minus2
DUP64	WT	1	7.45231	minus2
DUP64	WT	1	4.84422	minus2
DUP64	WT	1	7.23968	minus2
DUP64	WT	1	4.19342	minus2
DUP64	WT	1	5.31589	minus2
DUP64	WT	1	4.28671	minus2
DUP64	WT	1	4.44606	minus2
DUP64	WT	1	4.52468	minus2
DUP64	WT	1	1.94318	minus2
DUP64	WT	1	7.95528	minus2
DUP64	WT	1	4.39734	minus2
DUP64	WT	1	1.69628	minus2
DUP64	WT	1	1.78367	minus2
DUP64	WT	1	2.15785	minus2
DUP64	WT	1	1.97064	minus2
DUP64	WT	1	1.60659	minus2
DUP64	WT	1	2.14913	minus2
DUP64	WT	1	4.3299	minus2
DUP64	WT	1	4.15581	minus2
DUP64	WT	1	1.3758	minus2
DUP64	WT	1	4.42783	minus2
DUP64	WT	1	6.17111	minus2
DUP64	WT	1	2.20985	minus2
DUP64	WT	1	7.47575	minus2
DUP64	WT	1	5.17046	minus2
DUP64	WT	1	8.03228	minus2
DUP64	WT	1	2.59818	minus2
DUP64	WT	1	10.9764	minus2
DUP64	WT	1	2.98163	minus2
DUP64	WT	1	3.78952	minus2
DUP64	WT	1	2.24418	minus2
DUP64	WT	1	5.4703	minus2
DUP64	WT	1	2.7238	minus2
DUP64	WT	1	3.59624	minus2
DUP64	WT	1	4.58469	minus2
DUP64	WT	1	1.95235	minus2
DUP64	WT	1	8.8909	minus2
DUP64	WT	1	1.7451	minus2
DUP64	WT	1	3.01123	minus2
DUP64	WT	1	4.07373	minus2
DUP64	WT	1	2.71603	minus2
DUP64	WT	1	9.65636	minus2
DUP64	WT	1	7.9371	minus2
DUP64	WT	1	4.87328	minus2
DUP64	WT	1	4.91958	minus2
DUP64	WT	1	7.38649	minus2
DUP64	WT	1	1.36486	minus2
DUP64	WT	1	4.28671	minus2
DUP64	WT	1	2.09638	minus2
DUP64	WT	1	7.10578	minus2
DUP64	WT	1	4.52468	minus2
DUP64	WT	1	4.49452	minus2
DUP64	WT	1	3.87457	minus2
DUP64	WT	1	4.05467	minus2
DUP64	WT	1	1.7159	minus2
DUP64	WT	1	7.46169	minus2
DUP64	WT	1	3.90055	minus2
DUP64	WT	1	2.21846	minus2
DUP64	WT	1	3.68351	minus2
DUP64	WT	1	3.99723	minus2
DUP64	WT	1	3.74332	minus2
DUP64	WT	1	3.09187	minus2
DUP64	WT	1	4.86747	minus2
DUP64	WT	1	2.29519	minus2
DUP64	WT	1	5.62797	minus2
DUP64	WT	1	6.39591	minus2
DUP64	WT	1	2.80086	minus3
DUP64	WT	1	2.034	minus3
DUP64	WT	1	1.73539	minus3
DUP64	WT	1	1.95235	minus3
DUP64	WT	1	2.95934	minus3
DUP64	WT	1	6.0259	minus3
DUP64	WT	1	5.80473	minus3
DUP64	WT	1	2.922	minus3
DUP64	WT	1	3.43919	minus3
DUP64	WT	1	2.68486	minus3
DUP64	WT	1	7.95982	minus3
DUP64	WT	1	2.42853	minus3
DUP64	WT	1	3.35581	minus3
DUP64	WT	1	11.7365	minus3
DUP64	WT	1	1.84075	minus3
DUP64	WT	1	8.14935	minus3
DUP64	WT	1	4.02281	minus3
DUP64	WT	1	3.49422	minus3
DUP64	WT	1	5.90003	minus3
DUP64	WT	1	4.09907	minus3
DUP64	WT	1	1.98885	minus3
DUP64	WT	1	10.9183	minus3
DUP64	WT	1	6.96576	minus3
DUP64	WT	1	4.23086	minus3
DUP64	WT	1	7.74041	minus3
DUP64	WT	1	2.83139	minus3
DUP64	WT	1	1.54537	minus3
DUP64	WT	1	7.18722	minus3
DUP64	WT	1	4.5787	minus3
DUP64	WT	1	6.78013	minus3
DUP64	WT	1	4.37288	minus3
DUP64	WT	1	4.12434	minus3
DUP64	WT	1	2.66921	minus3
DUP64	WT	1	3.85503	minus3
DUP64	WT	1	11.0959	minus3
DUP64	WT	1	6.64667	minus3
DUP64	WT	1	4.02281	minus3
DUP64	WT	1	3.46676	minus3
DUP64	WT	1	3.05535	minus3
DUP64	WT	1	4.98289	minus3
DUP64	WT	1	3.78294	minus3
DUP64	WT	1	18.3116	minus3
DUP64	WT	1	6.84392	minus3
DUP64	WT	1	1.42986	minus3
DUP64	WT	1	2.90699	minus3
DUP64	WT	1	9.74271	minus3
DUP64	WT	1	13.3145	minus3
DUP64	WT	1	9.65223	minus3
DUP64	WT	1	4.46427	minus3
DUP64	WT	1	3.83543	minus3
DUP64	WT	1	2.70047	minus3
DUP64	WT	1	6.98031	minus3
DUP64	WT	1	6.84881	minus3
DUP64	WT	1	4.12434	minus3
DUP64	WT	1	4.81509	minus3
DUP64	WT	1	4.59664	minus3
DUP64	WT	1	7.07693	minus3
DUP64	WT	1	1.72566	minus3
DUP64	WT	1	2.12284	minus3
DUP64	WT	1	2.14038	minus3
DUP64	WT	1	2.99645	minus3
DUP64	WT	1	2.86931	minus3
DUP64	WT	1	5.34916	minus3
DUP64	WT	1	6.2482	minus3
DUP64	WT	1	10.9222	minus3
DUP64	WT	1	3.0186	minus3
DUP64	WT	1	3.74332	minus4
DUP64	WT	1	5.78345	minus4
DUP64	WT	1	8.00515	minus4
DUP64	WT	1	2.4203	minus4
DUP64	WT	1	1.79325	minus4
DUP64	WT	1	9.39076	minus4
DUP64	WT	1	1.287	minus4
DUP64	WT	1	1.84075	minus4
DUP64	WT	1	5.9053	minus4
DUP64	WT	1	4.98862	minus4
DUP64	WT	1	3.73008	minus4
DUP64	WT	1	11.0111	minus4
DUP64	WT	1	5.94738	minus4
DUP64	WT	1	3.85503	minus4
DUP64	WT	1	6.51186	minus4
DUP64	WT	1	4.41564	minus4
DUP64	WT	1	15.6409	minus4
DUP64	WT	1	8.49123	minus4
DUP64	WT	1	6.75058	minus4
DUP64	WT	1	5.4319	minus4
DUP64	WT	1	4.99436	minus4
DUP64	WT	1	4.39734	minus4
DUP64	WT	1	6.77029	minus4
DUP64	WT	1	1.33177	minus4
DUP64	WT	1	11.2835	minus4
DUP64	WT	1	4.99436	minus4
DUP64	WT	1	5.56843	minus4
DUP64	WT	1	3.99723	minus4
DUP64	WT	1	9.39911	minus4
DUP64	WT	1	7.13937	minus4
DUP64	WT	1	2.24418	minus4
DUP64	WT	1	3.29964	minus4
DUP64	WT	1	7.08174	minus4
DUP64	WT	1	12.9682	minus4
DUP64	WT	1	5.14227	minus4
DUP64	WT	1	6.28401	minus4
DUP64	WT	1	1.85958	minus4
DUP64	WT	1	5.69256	minus4
DUP64	WT	1	3.97799	minus4
DUP64	WT	1	1.7451	minus4
DUP64	WT	1	2.51811	minus4
DUP64	WT	1	3.46676	minus4
DUP64	WT	1	3.50106	minus4
DUP64	WT	1	10.9493	minus4
DUP64	WT	1	3.9844	minus4
DUP64	WT	1	5.74611	minus4
DUP64	WT	1	4.57272	minus4
DUP64	WT	1	1.97976	minus4
DUP64	WT	1	1.79325	minus4
DUP64	WT	1	1.3758	minus4
DUP64	WT	1	3.14987	minus4
DUP64	WT	1	2.92949	minus4
DUP64	WT	1	2.5663	minus4
DUP64	WT	1	1.53506	minus4
DUP64	WT	1	4.98289	minus4
DUP64	WT	2	1.90625	minus2
DUP64	WT	2	1.36486	minus2
DUP64	WT	2	2.06976	minus2
DUP64	WT	2	2.66921	minus2
DUP64	WT	2	3.14265	minus2
DUP64	WT	2	2.06085	minus2
DUP64	WT	2	2.26125	minus2
DUP64	WT	2	1.13097	minus2
DUP64	WT	2	1.78367	minus2
DUP64	WT	2	2.66136	minus2
DUP64	WT	2	2.26975	minus2
DUP64	WT	2	1.51431	minus2
DUP64	WT	2	5.33254	minus2
DUP64	WT	2	2.95189	minus2
DUP64	WT	2	3.87457	minus2
DUP64	WT	2	2.25272	minus2
DUP64	WT	2	7.12499	minus2
DUP64	WT	2	8.00967	minus2
DUP64	WT	2	3.72344	minus2
DUP64	WT	2	1.26432	minus2
DUP64	WT	2	1.13097	minus2
DUP64	WT	2	17.1868	minus2
DUP64	WT	2	1.36486	minus2
DUP64	WT	2	2.10522	minus2
DUP64	WT	2	2.6535	minus2
DUP64	WT	2	3.7961	minus2
DUP64	WT	2	1.62673	minus2
DUP64	WT	2	2.17525	minus2
DUP64	WT	2	2.73156	minus2
DUP64	WT	2	2.4203	minus2
DUP64	WT	2	2.09638	minus2
DUP64	WT	2	1.99792	minus2
DUP64	WT	2	4.62646	minus2
DUP64	WT	2	2.42853	minus2
DUP64	WT	2	1.41913	minus2
DUP64	WT	2	2.19259	minus2
DUP64	WT	2	2.18393	minus2
DUP64	WT	2	5.70329	minus2
DUP64	WT	2	3.07729	minus2
DUP64	WT	2	2.20123	minus2
DUP64	WT	2	1.73539	minus2
DUP64	WT	2	2.39554	minus2
DUP64	WT	2	3.0186	minus2
DUP64	WT	2	3.52157	minus2
DUP64	WT	2	1.63676	minus2
DUP64	WT	2	1.35387	minus2
DUP64	WT	2	6.07796	minus2
DUP64	WT	2	1.24143	minus2
DUP64	WT	2	1.84075	minus2
DUP64	WT	2	6.55695	minus2
DUP64	WT	2	1.4512	minus2
DUP64	WT	2	2.28672	minus2
DUP64	WT	2	4.02281	minus2
DUP64	WT	2	1.89696	minus2
DUP64	WT	2	1.63676	minus2
DUP64	WT	2	3.68351	minus2
DUP64	WT	2	3.5624	minus2
DUP64	WT	2	3.62321	minus2
DUP64	WT	2	2.74703	minus2
DUP64	WT	2	4.40345	minus2
DUP64	WT	2	2.63776	minus2
DUP64	WT	2	2.77016	minus2
DUP64	WT	2	2.5663	minus2
DUP64	WT	2	2.5583	minus2
DUP64	WT	2	3.31373	minus2
DUP64	WT	2	3.83543	minus2
DUP64	WT	2	3.32076	minus2
DUP64	WT	2	4.96566	minus2
DUP64	WT	2	7.68507	minus2
DUP64	WT	2	3.3628	minus2
DUP64	WT	2	1.73539	minus2
DUP64	WT	2	4.26193	minus2
DUP64	WT	2	15.9342	minus2
DUP64	WT	2	1.40836	minus2
DUP64	WT	2	3.93291	minus2
DUP64	WT	2	1.94318	minus2
DUP64	WT	2	7.06729	minus2
DUP64	WT	2	3.75655	minus2
DUP64	WT	2	1.51431	minus2
DUP64	WT	2	4.09907	minus2
DUP64	WT	2	2.86175	minus2
DUP64	WT	2	2.67704	minus2
DUP64	WT	2	3.91998	minus2
DUP64	WT	2	3.06998	minus2
DUP64	WT	2	1.7451	minus2
DUP64	WT	2	9.89801	minus2
DUP64	WT	2	4.69764	minus2
DUP64	WT	2	1.58631	minus2
DUP64	WT	2	1.94318	minus2
DUP64	WT	2	5.62257	minus2
DUP64	WT	2	3.05535	minus2
DUP64	WT	2	7.457	minus2
DUP64	WT	2	2.32888	minus2
DUP64	WT	2	5.73008	minus2
DUP64	WT	2	2.14038	minus2
DUP64	WT	2	2.27825	minus2
DUP64	WT	2	1.35387	minus2
DUP64	WT	2	2.05192	minus2
DUP64	WT	2	2.98905	minus2
DUP64	WT	2	2.50194	minus2
DUP64	WT	2	2.16656	minus2
DUP64	WT	2	3.97799	minus2
DUP64	WT	2	4.37288	minus2
DUP64	WT	2	2.34563	minus2
DUP64	WT	2	3.9844	minus2
DUP64	WT	2	4.43999	minus2
DUP64	WT	2	2.02501	minus2
DUP64	WT	2	4.43999	minus2
DUP64	WT	2	3.06998	minus2
DUP64	WT	2	1.39755	minus2
DUP64	WT	2	1.79325	minus2
DUP64	WT	2	3.10642	minus2
DUP64	WT	2	3.23588	minus2
DUP64	WT	2	3.05535	minus2
DUP64	WT	2	3.15708	minus2
DUP64	WT	2	3.54881	minus2
DUP64	WT	2	2.41206	minus2
DUP64	WT	2	3.93291	minus2
DUP64	WT	2	6.58692	minus2
DUP64	WT	2	2.28672	minus2
DUP64	WT	2	2.49384	minus2
DUP64	WT	2	4.36062	minus2
DUP64	WT	2	12.6065	minus2
DUP64	WT	2	2.15785	minus2
DUP64	WT	2	4.89645	minus2
DUP64	WT	2	1.46182	minus3
DUP64	WT	2	0.907496	minus3
DUP64	WT	2	2.06976	minus3
DUP64	WT	2	1.18327	minus3
DUP64	WT	2	1.86896	minus3
DUP64	WT	2	1.46182	minus3
DUP64	WT	2	1.44055	minus3
DUP64	WT	2	1.2067	minus3
DUP64	WT	2	1.87832	minus3
DUP64	WT	2	1.32064	minus3
DUP64	WT	2	0.920891	minus3
DUP64	WT	2	2.6535	minus3
DUP64	WT	2	6.09872	minus3
DUP64	WT	2	3.31373	minus3
DUP64	WT	2	2.32888	minus3
DUP64	WT	2	2.31206	minus3
DUP64	WT	2	1.44055	minus3
DUP64	WT	2	1.02478	minus3
DUP64	WT	2	1.34284	minus3
DUP64	WT	2	2.34563	minus3
DUP64	WT	2	7.2587	minus3
DUP64	WT	2	1.61668	minus3
DUP64	WT	2	1.93398	minus3
DUP64	WT	2	4.3299	minus3
DUP64	WT	2	3.77635	minus3
DUP64	WT	2	1.79325	minus3
DUP64	WT	2	4.98289	minus3
DUP64	WT	2	2.7393	minus3
DUP64	WT	2	3.56918	minus3
DUP64	WT	2	3.86155	minus3
DUP64	WT	2	2.37065	minus3
DUP64	WT	2	1.1357	minus3
DUP64	WT	2	2.09638	minus3
DUP64	WT	2	2.922	minus3
DUP64	WT	2	1.12365	minus3
DUP64	WT	2	1.46182	minus3
DUP64	WT	2	1.01209	minus3
DUP64	WT	2	6.78505	minus3
DUP64	WT	2	2.77016	minus3
DUP64	WT	2	4.04831	minus3
DUP64	WT	2	5.10832	minus3
DUP64	WT	2	3.54201	minus3
DUP64	WT	2	4.23708	minus3
DUP64	WT	2	1.69628	minus3
DUP64	WT	2	2.37065	minus3
DUP64	WT	2	1.07478	minus3
DUP64	WT	2	4.87328	minus3
DUP64	WT	2	5.37681	minus3
DUP64	WT	2	2.93696	minus3
DUP64	WT	2	3.95226	minus3
DUP64	WT	2	1.44055	minus3
DUP64	WT	2	1.18327	minus3
DUP64	WT	2	1.38669	minus3
DUP64	WT	2	2.28672	minus3
DUP64	WT	2	2.41206	minus3
DUP64	WT	2	1.17147	minus3
DUP64	WT	2	3.48736	minus3
DUP64	WT	2	4.17463	minus3
DUP64	WT	2	5.23224	minus3
DUP64	WT	2	2.922	minus3
DUP64	WT	2	6.73085	minus3
DUP64	WT	2	5.11399	minus3
DUP64	WT	2	2.62987	minus3
DUP64	WT	2	1.21834	minus3
DUP64	WT	2	2.15785	minus3
DUP64	WT	2	1.8028	minus3
DUP64	WT	2	3.99723	minus3
DUP64	WT	2	3.67684	minus3
DUP64	WT	2	3.04068	minus3
DUP64	WT	2	2.75475	minus3
DUP64	WT	2	2.53422	minus3
DUP64	WT	2	4.73303	minus3
DUP64	WT	2	2.922	minus3
DUP64	WT	2	1.2529	minus3
DUP64	WT	2	3.15708	minus3
DUP64	WT	2	2.11404	minus3
DUP64	WT	2	4.98862	minus3
DUP64	WT	2	1.66665	minus3
DUP64	WT	2	2.27825	minus3
DUP64	WT	2	2.04297	minus3
DUP64	WT	2	1.02478	minus3
DUP64	WT	2	1.12365	minus3
DUP64	WT	2	1.67656	minus3
DUP64	WT	2	4.29289	minus3
DUP64	WT	2	1.21834	minus3
DUP64	WT	2	1.97976	minus3
DUP64	WT	2	3.86806	minus3
DUP64	WT	2	3.84197	minus3
DUP64	WT	2	3.88757	minus3
DUP64	WT	2	1.50389	minus3
DUP64	WT	2	1.17147	minus3
DUP64	WT	2	2.99645	minus3
DUP64	WT	2	3.06267	minus3
DUP64	WT	2	1.94318	minus3
DUP64	WT	2	3.71016	minus3
DUP64	WT	2	1.09935	minus3
DUP64	WT	2	1.18327	minus3
DUP64	WT	2	1.59647	minus3
DUP64	WT	2	2.41206	minus3
DUP64	WT	2	1.8028	minus3
DUP64	WT	2	1.65672	minus3
DUP64	WT	2	1.78367	minus3
DUP64	WT	2	4.78	minus3
DUP64	WT	2	2.89195	minus3
DUP64	WT	2	1.22991	minus3
DUP64	WT	2	4.08641	minus3
DUP64	WT	2	2.37065	minus3
DUP64	WT	2	1.68644	minus3
DUP64	WT	2	3.3628	minus3
DUP64	WT	2	2.59818	minus3
DUP64	WT	2	5.76213	minus3
DUP64	WT	2	4.11171	minus3
DUP64	WT	2	2.99645	minus3
DUP64	WT	2	1.47239	minus3
DUP64	WT	2	2.69267	minus3
DUP64	WT	2	4.65619	minus3
DUP64	WT	2	1.35387	minus3
DUP64	WT	2	1.17147	minus3
DUP64	WT	2	1.22991	minus3
DUP64	WT	2	3.37675	minus3
DUP64	WT	2	1.30948	minus3
DUP64	WT	2	2.71603	minus3
DUP64	WT	2	2.06976	minus3
DUP64	WT	2	1.89696	minus3
DUP64	WT	2	1.57613	minus3
DUP64	WT	2	1.94318	minus3
DUP64	WT	2	2.27825	minus3
DUP64	WT	2	3.96513	minus3
DUP64	WT	2	2.27825	minus3
DUP64	WT	2	2.46129	minus3
DUP64	WT	2	1.11153	minus4
DUP64	WT	2	1.2529	minus4
DUP64	WT	2	1.75478	minus4
DUP64	WT	2	1.61668	minus4
DUP64	WT	2	0.986467	minus4
DUP64	WT	2	0.960506	minus4
DUP64	WT	2	1.32064	minus4
DUP64	WT	2	0.880404	minus4
DUP64	WT	2	1.8028	minus4
DUP64	WT	2	9.91835	minus4
DUP64	WT	2	5.15919	minus4
DUP64	WT	2	5.14227	minus4
DUP64	WT	2	1.06239	minus4
DUP64	WT	2	2.26125	minus4
DUP64	WT	2	3.28553	minus4
DUP64	WT	2	5.31033	minus4
DUP64	WT	2	1.79325	minus4
DUP64	WT	2	2.44493	minus4
DUP64	WT	2	1.24143	minus4
DUP64	WT	2	1.46182	minus4
DUP64	WT	2	0.986467	minus4
DUP64	WT	2	1.01209	minus4
DUP64	WT	2	0.81076	minus4
DUP64	WT	2	1.03739	minus4
DUP64	WT	2	1.15961	minus4
DUP64	WT	2	0.894001	minus4
DUP64	WT	2	1.02478	minus4
DUP64	WT	2	10.7666	minus4
DUP64	WT	2	8.15383	minus4
DUP64	WT	2	4.08007	minus4
DUP64	WT	2	4.18716	minus4
DUP64	WT	2	6.97546	minus4
DUP64	WT	2	0.986467	minus4
DUP64	WT	2	5.10832	minus4
DUP64	WT	2	4.12434	minus4
DUP64	WT	2	3.88757	minus4
DUP64	WT	2	2.26975	minus4
DUP64	WT	2	4.33605	minus4
DUP64	WT	2	9.26917	minus4
DUP64	WT	2	2.89948	minus4
DUP64	WT	2	2.37065	minus4
DUP64	WT	2	4.67397	minus4
DUP64	WT	2	3.73008	minus4
DUP64	WT	2	8.82204	minus4
DUP64	WT	2	9.36985	minus4
DUP64	WT	2	5.07427	minus4
DUP64	WT	2	2.97421	minus4
DUP64	WT	2	1.1357	minus4
DUP64	WT	2	4.86747	minus4
DUP64	WT	2	2.922	minus4
DUP64	WT	2	2.02501	minus4
DUP64	WT	2	2.7932	minus4
DUP64	WT	2	5.55213	minus4
DUP64	WT	2	6.12979	minus4
DUP64	WT	2	3.15708	minus4
DUP64	WT	2	2.59818	minus4
DUP64	WT	2	1.78367	minus4
DUP64	WT	2	3.62993	minus4
DUP64	WT	2	1.34284	minus4
DUP64	WT	2	1.66665	minus4
DUP64	WT	2	1.32064	minus4
DUP64	WT	2	1.66665	minus4
DUP64	WT	2	4.5787	minus4
DUP64	WT	2	2.98163	minus4
DUP64	WT	2	3.30669	minus4
DUP64	WT	2	1.35387	minus4
DUP64	WT	2	5.14791	minus4
DUP64	WT	2	3.28553	minus4
DUP64	WT	2	1.68644	minus4
DUP64	WT	2	2.37065	minus4
DUP64	WT	2	2.69267	minus4
DUP64	WT	2	3.7961	minus4
DUP64	WT	2	3.52157	minus4
DUP64	WT	2	5.26019	minus4
DUP64	WT	2	2.32888	minus4
DUP64	WT	2	3.73008	minus4
DUP64	WT	2	0.97353	minus4
DUP64	WT	2	0.986467	minus4
DUP64	WT	2	4.65619	minus4
DUP64	WT	2	5.4099	minus4
DUP64	WT	2	2.81614	minus4
DUP64	WT	2	2.6535	minus4
DUP64	WT	2	1.40836	minus4
DUP64	WT	2	4.13064	minus4
DUP64	WT	2	1.8028	minus4
DUP64	WT	2	3.62993	minus4
DUP64	WT	2	3.68351	minus4
DUP64	WT	2	1.36486	minus4
DUP64	WT	2	5.33254	minus4
DUP64	WT	2	3.46676	minus4
DUP64	WT	2	1.38669	minus4
DUP64	WT	2	1.92476	minus4
DUP64	WT	2	1.55566	minus4
DUP64	WT	2	4.21216	minus4
DUP64	WT	2	2.83899	minus4
DUP64	WT	2	1.35387	minus4
DUP64	WT	2	14.6838	minus4
DUP64	WT	2	3.243	minus4
DUP64	WT	2	1.50389	minus4
DUP64	WT	2	4.96566	minus4
DUP64	WT	2	6.00501	minus4
DUP64	WT	2	5.14791	minus4
DUP64	WT	2	6.05196	minus4
DUP64	WT	2	2.93696	minus4
DUP64	WT	2	3.91998	minus4
DUP64	WT	2	5.18735	minus4
DUP64	WT	2	5.00009	minus4
DUP64	WT	2	2.016	minus4
DUP64	WT	2	6.46157	minus4
DUP64	WT	2	3.15708	minus4
DUP64	WT	2	9.5489	minus4
DUP64	WT	2	6.34009	minus4
DUP64	WT	2	2.77785	minus4
DUP64	WT	2	2.39554	minus4
DUP64	WT	2	1.14768	minus4
DUP64	WT	2	1.287	minus4
DUP64	WT	2	4.81509	minus4
DUP64	WT	2	1.66665	minus4
DUP64	WT	2	1.2067	minus4
DUP64	WT	2	4.16836	minus4
DUP64	WT	2	1.17147	minus4
DUP64	WT	2	3.82889	minus4
DUP64	WT	2	2.62987	minus4
DUP64	WT	2	1.50389	minus4
DUP64	WT	2	0.99932	minus4
DUP64	WT	2	3.14265	minus4
DUP64	WT	2	1.95235	minus4
DUP64	WT	3	1.22991	minus2
DUP64	WT	3	1.61668	minus2
DUP64	WT	3	1.4512	minus2
DUP64	WT	3	3.23588	minus2
DUP64	WT	3	2.26125	minus2
DUP64	WT	3	10.7393	minus2
DUP64	WT	3	3.23588	minus2
DUP64	WT	3	4.06738	minus2
DUP64	WT	3	2.32888	minus2
DUP64	WT	3	2.09638	minus2
DUP64	WT	3	2.33726	minus2
DUP64	WT	3	3.48736	minus2
DUP64	WT	3	2.45312	minus2
DUP64	WT	3	1.98885	minus2
DUP64	WT	3	1.59647	minus2
DUP64	WT	3	2.46945	minus2
DUP64	WT	3	1.41913	minus2
DUP64	WT	3	9.77551	minus2
DUP64	WT	3	4.42174	minus2
DUP64	WT	3	3.91351	minus2
DUP64	WT	3	2.37896	minus2
DUP64	WT	3	4.93112	minus2
DUP64	WT	3	12.0484	minus2
DUP64	WT	3	8.63565	minus2
DUP64	WT	3	2.37896	minus2
DUP64	WT	3	1.44055	minus2
DUP64	WT	3	1.57613	minus2
DUP64	WT	3	3.31373	minus2
DUP64	WT	3	2.66136	minus2
DUP64	WT	3	3.65677	minus2
DUP64	WT	3	1.75478	minus2
DUP64	WT	3	1.59647	minus2
DUP64	WT	3	2.98905	minus2
DUP64	WT	3	4.02281	minus2
DUP64	WT	3	1.3758	minus2
DUP64	WT	3	1.89696	minus2
DUP64	WT	3	2.16656	minus2
DUP64	WT	3	2.016	minus2
DUP64	WT	3	4.35449	minus2
DUP64	WT	3	3.99082	minus2
DUP64	WT	3	17.8568	minus2
DUP64	WT	3	9.22284	minus2
DUP64	WT	3	2.46945	minus2
DUP64	WT	3	1.56591	minus2
DUP64	WT	3	7.49915	minus2
DUP64	WT	3	5.24343	minus2
DUP64	WT	3	2.15785	minus2
DUP64	WT	3	2.86931	minus2
DUP64	WT	3	5.10832	minus2
DUP64	WT	3	3.12819	minus2
DUP64	WT	3	2.49384	minus2
DUP64	WT	3	4.42783	minus2
DUP64	WT	3	12.6246	minus2
DUP64	WT	3	2.51811	minus2
DUP64	WT	3	2.99645	minus2
DUP64	WT	3	5.19859	minus2
DUP64	WT	3	1.94318	minus2
DUP64	WT	3	2.10522	minus2
DUP64	WT	3	3.29964	minus2
DUP64	WT	3	1.61668	minus2
DUP64	WT	3	3.2501	minus2
DUP64	WT	3	13.103	minus2
DUP64	WT	3	1.92476	minus2
DUP64	WT	3	1.68644	minus3
DUP64	WT	3	1.06239	minus3
DUP64	WT	3	1.36486	minus3
DUP64	WT	3	3.86155	minus3
DUP64	WT	3	4.5307	minus3
DUP64	WT	3	5.4099	minus3
DUP64	WT	3	9.15524	minus3
DUP64	WT	3	2.70047	minus3
DUP64	WT	3	3.51474	minus3
DUP64	WT	3	4.75067	minus3
DUP64	WT	3	4.3299	minus3
DUP64	WT	3	1.35387	minus3
DUP64	WT	3	2.922	minus3
DUP64	WT	3	7.15375	minus3
DUP64	WT	3	8.21203	minus3
DUP64	WT	3	3.69018	minus3
DUP64	WT	3	5.21542	minus3
DUP64	WT	3	4.69764	minus3
DUP64	WT	3	2.48572	minus3
DUP64	WT	3	3.31373	minus3
DUP64	WT	3	3.9587	minus3
DUP64	WT	3	3.94581	minus3
DUP64	WT	3	1.81232	minus3
DUP64	WT	3	2.32888	minus3
DUP64	WT	3	1.64675	minus3
DUP64	WT	3	5.42091	minus3
DUP64	WT	3	6.38071	minus3
DUP64	WT	3	1.42986	minus3
DUP64	WT	3	7.92346	minus3
DUP64	WT	3	3.17148	minus3
DUP64	WT	3	7.61562	minus3
DUP64	WT	3	8.80479	minus3
DUP64	WT	3	3.30669	minus3
DUP64	WT	3	2.36233	minus3
DUP64	WT	3	12.0004	minus3
DUP64	WT	3	5.44838	minus3
DUP64	WT	3	2.98163	minus3
DUP64	WT	3	4.00363	minus3
DUP64	WT	3	2.02501	minus3
DUP64	WT	3	6.09872	minus3
DUP64	WT	3	1.97976	minus3
DUP64	WT	3	2.66921	minus3
DUP64	WT	3	3.18585	minus3
DUP64	WT	3	1.46182	minus3
DUP64	WT	3	2.46945	minus3
DUP64	WT	3	2.81614	minus3
DUP64	WT	3	5.55213	minus3
DUP64	WT	3	3.2572	minus3
DUP64	WT	3	2.45312	minus3
DUP64	WT	3	2.95934	minus3
DUP64	WT	3	2.31206	minus3
DUP64	WT	3	2.7238	minus3
DUP64	WT	3	2.89948	minus3
DUP64	WT	3	3.54881	minus3
DUP64	WT	3	4.31142	minus3
DUP64	WT	3	6.66156	minus3
DUP64	WT	3	6.32482	minus3
DUP64	WT	3	5.48672	minus3
DUP64	WT	3	2.32048	minus3
DUP64	WT	3	13.2371	minus3
DUP64	WT	3	2.82377	minus3
DUP64	WT	3	3.0186	minus3
DUP64	WT	3	3.99723	minus3
DUP64	WT	3	1.60659	minus4
DUP64	WT	3	1.2067	minus4
DUP64	WT	3	1.89696	minus4
DUP64	WT	3	3.58949	minus4
DUP64	WT	3	3.99082	minus4
DUP64	WT	3	1.95235	minus4
DUP64	WT	3	2.08753	minus4
DUP64	WT	3	1.287	minus4
DUP64	WT	3	9.68107	minus4
DUP64	WT	3	4.08641	minus4
DUP64	WT	3	7.23492	minus4
DUP64	WT	3	1.73539	minus4
DUP64	WT	3	2.86175	minus4
DUP64	WT	3	1.32064	minus4
DUP64	WT	3	1.48293	minus4
DUP64	WT	3	1.77407	minus4
DUP64	WT	3	1.59647	minus4
DUP64	WT	3	4.47033	minus4
DUP64	WT	3	5.95263	minus4
DUP64	WT	3	3.95226	minus4
DUP64	WT	3	1.77407	minus4
DUP64	WT	3	4.36675	minus4
DUP64	WT	3	6.20714	minus4
DUP64	WT	3	2.53422	minus4
DUP64	WT	3	4.12434	minus4
DUP64	WT	3	3.60974	minus4
DUP64	WT	3	2.5663	minus4
DUP64	WT	3	2.29519	minus4
DUP64	WT	3	13.1631	minus4
DUP64	WT	3	2.7238	minus4
DUP64	WT	3	8.98514	minus4
DUP64	WT	3	1.84075	minus4
DUP64	WT	3	3.97799	minus4
DUP64	WT	3	2.016	minus4
DUP64	WT	3	4.38512	minus4
DUP64	WT	3	6.28401	minus4
DUP64	WT	3	15.4883	minus4
DUP64	WT	3	5.0572	minus4
DUP64	WT	3	1.8028	minus4
DUP64	WT	3	2.66136	minus4
DUP64	WT	3	2.09638	minus4
DUP64	WT	3	2.52617	minus4
DUP64	WT	3	3.3628	minus4
DUP64	WT	3	2.51811	minus4
DUP64	WT	3	2.20985	minus4
DUP64	WT	3	2.51811	minus4
DUP64	WT	3	8.57015	minus4
DUP64	WT	3	2.33726	minus4
DUP64	WT	3	4.61454	minus4
DUP64	WT	4	1.51431	minus2
DUP64	WT	4	1.15961	minus2
DUP64	WT	4	1.22991	minus2
DUP64	WT	4	1.18327	minus2
DUP64	WT	4	1.5247	minus2
DUP64	WT	4	1.30948	minus2
DUP64	WT	4	1.11153	minus2
DUP64	WT	4	2.71603	minus2
DUP64	WT	4	3.04068	minus2
DUP64	WT	4	5.14227	minus2
DUP64	WT	4	1.46182	minus2
DUP64	WT	4	3.17867	minus2
DUP64	WT	4	1.24143	minus2
DUP64	WT	4	7.49915	minus2
DUP64	WT	4	1.7451	minus2
DUP64	WT	4	1.27568	minus2
DUP64	WT	4	4.52468	minus2
DUP64	WT	4	1.32064	minus2
DUP64	WT	4	2.86931	minus2
DUP64	WT	4	3.82889	minus2
DUP64	WT	4	2.7932	minus2
DUP64	WT	4	2.85417	minus2
DUP64	WT	4	4.90224	minus2
DUP64	WT	4	2.16656	minus2
DUP64	WT	4	1.32064	minus2
DUP64	WT	4	1.53506	minus2
DUP64	WT	4	1.24143	minus2
DUP64	WT	4	2.29519	minus2
DUP64	WT	4	1.17147	minus2
DUP64	WT	4	2.22705	minus2
DUP64	WT	4	1.84075	minus2
DUP64	WT	4	4.379	minus2
DUP64	WT	4	1.58631	minus2
DUP64	WT	4	5.45934	minus2
DUP64	WT	4	4.28052	minus2
DUP64	WT	4	1.85018	minus2
DUP64	WT	4	3.76976	minus2
DUP64	WT	4	2.09638	minus2
DUP64	WT	4	3.63665	minus2
DUP64	WT	4	2.73156	minus2
DUP64	WT	4	7.8779	minus2
DUP64	WT	4	2.7238	minus2
DUP64	WT	4	2.61405	minus2
DUP64	WT	4	1.68644	minus2
DUP64	WT	4	4.50056	minus2
DUP64	WT	4	1.67656	minus2
DUP64	WT	4	1.75478	minus2
DUP64	WT	4	3.60299	minus2
DUP64	WT	4	2.18393	minus2
DUP64	WT	4	4.5307	minus2
DUP64	WT	4	3.63665	minus2
DUP64	WT	4	4.16836	minus2
DUP64	WT	4	6.04154	minus2
DUP64	WT	4	4.87908	minus2
DUP64	WT	4	3.36978	minus2
DUP64	WT	4	3.68351	minus2
DUP64	WT	4	2.90699	minus2
DUP64	WT	4	14.6904	minus2
DUP64	WT	4	3.84197	minus2
DUP64	WT	4	5.91057	minus2
DUP64	WT	4	1.59647	minus2
DUP64	WT	4	3.14987	minus2
DUP64	WT	4	1.34284	minus2
DUP64	WT	4	1.5247	minus2
DUP64	WT	4	3.90703	minus2
DUP64	WT	4	4.19342	minus2
DUP64	WT	4	3.56918	minus2
DUP64	WT	4	1.8028	minus2
DUP64	WT	4	1.68644	minus2
DUP64	WT	4	1.66665	minus2
DUP64	WT	4	6.10909	minus2
DUP64	WT	4	2.54226	minus2
DUP64	WT	4	2.5583	minus2
DUP64	WT	4	8.10892	minus2
DUP64	WT	4	6.71604	minus2
DUP64	WT	4	4.28671	minus2
DUP64	WT	4	1.62673	minus2
DUP64	WT	4	3.7168	minus2
DUP64	WT	4	4.05467	minus2
DUP64	WT	4	4.40955	minus2
DUP64	WT	4	8.0368	minus2
DUP64	WT	4	2.54226	minus2
DUP64	WT	4	2.10522	minus2
DUP64	WT	4	1.46182	minus2
DUP64	WT	4	9.82868	minus2
DUP64	WT	4	2.7238	minus2
DUP64	WT	4	8.62693	minus2
DUP64	WT	4	2.51003	minus2
DUP64	WT	4	1.65672	minus2
DUP64	WT	4	6.71109	minus2
DUP64	WT	4	4.09907	minus2
DUP64	WT	4	4.25573	minus2
DUP64	WT	4	2.83899	minus2
DUP64	WT	4	6.38578	minus2
DUP64	WT	4	5.45386	minus2
DUP64	WT	4	4.80925	minus2
DUP64	WT	4	2.21846	minus2
DUP64	WT	4	4.47638	minus2
DUP64	WT	4	2.51811	minus2
DUP64	WT	4	7.55983	minus2
DUP64	WT	4	1.81232	minus2
DUP64	WT	4	5.33254	minus2
DUP64	WT	4	5.26577	minus2
DUP64	WT	4	2.28672	minus2
DUP64	WT	4	7.10098	minus2
DUP64	WT	4	4.16209	minus2
DUP64	WT	4	3.32778	minus2
DUP64	WT	4	3.88757	minus2
DUP64	WT	4	3.78952	minus2
DUP64	WT	4	2.08753	minus2
DUP64	WT	4	4.01642	minus2
DUP64	WT	4	3.46676	minus2
DUP64	WT	4	10.5627	minus2
DUP64	WT	4	2.53422	minus2
DUP64	WT	4	3.43228	minus2
DUP64	WT	4	5.32699	minus2
DUP64	WT	4	3.01123	minus2
DUP64	WT	4	2.13162	minus3
DUP64	WT	4	2.28672	minus3
DUP64	WT	4	2.23562	minus3
DUP64	WT	4	1.53506	minus3
DUP64	WT	4	1.27568	minus3
DUP64	WT	4	3.28553	minus3
DUP64	WT	4	1.73539	minus3
DUP64	WT	4	1.76444	minus3
DUP64	WT	4	1.73539	minus3
DUP64	WT	4	1.55566	minus3
DUP64	WT	4	1.26432	minus3
DUP64	WT	4	1.07478	minus3
DUP64	WT	4	1.34284	minus3
DUP64	WT	4	1.92476	minus3
DUP64	WT	4	1.33177	minus3
DUP64	WT	4	1.65672	minus3
DUP64	WT	4	2.37896	minus3
DUP64	WT	4	1.55566	minus3
DUP64	WT	4	1.36486	minus3
DUP64	WT	4	3.99723	minus3
DUP64	WT	4	3.2501	minus3
DUP64	WT	4	2.07865	minus3
DUP64	WT	4	3.89407	minus3
DUP64	WT	4	3.02597	minus3
DUP64	WT	4	3.69018	minus3
DUP64	WT	4	6.8879	minus3
DUP64	WT	4	9.86949	minus3
DUP64	WT	4	2.47759	minus3
DUP64	WT	4	2.05192	minus3
DUP64	WT	4	2.34563	minus3
DUP64	WT	4	1.97976	minus3
DUP64	WT	4	1.40836	minus3
DUP64	WT	4	5.02297	minus3
DUP64	WT	4	3.00384	minus3
DUP64	WT	4	3.43919	minus3
DUP64	WT	4	1.92476	minus3
DUP64	WT	4	1.51431	minus3
DUP64	WT	4	3.30669	minus3
DUP64	WT	4	5.82598	minus3
DUP64	WT	4	1.96151	minus3
DUP64	WT	4	3.22876	minus3
DUP64	WT	4	4.33605	minus3
DUP64	WT	4	1.87832	minus3
DUP64	WT	4	1.77407	minus3
DUP64	WT	4	4.09274	minus3
DUP64	WT	4	1.59647	minus3
DUP64	WT	4	3.02597	minus3
DUP64	WT	4	6.82922	minus3
DUP64	WT	4	4.13064	minus3
DUP64	WT	4	1.96151	minus3
DUP64	WT	4	2.50194	minus3
DUP64	WT	4	2.52617	minus3
DUP64	WT	4	1.2067	minus3
DUP64	WT	4	5.76213	minus3
DUP64	WT	4	2.33726	minus3
DUP64	WT	4	1.76444	minus3
DUP64	WT	4	3.09915	minus3
DUP64	WT	4	1.94318	minus3
DUP64	WT	4	5.20982	minus3
DUP64	WT	4	5.50311	minus3
DUP64	WT	4	2.46129	minus3
DUP64	WT	4	5.32144	minus3
DUP64	WT	4	13.5903	minus3
DUP64	WT	4	3.93936	minus3
DUP64	WT	4	1.39755	minus3
DUP64	WT	4	1.7061	minus3
DUP64	WT	4	3.2643	minus3
DUP64	WT	4	3.35581	minus3
DUP64	WT	4	2.42853	minus3
DUP64	WT	4	2.85417	minus3
DUP64	WT	4	2.89948	minus3
DUP64	WT	4	1.49342	minus3
DUP64	WT	4	3.45987	minus3
DUP64	WT	4	2.77785	minus3
DUP64	WT	4	6.96091	minus3
DUP64	WT	4	6.08315	minus3
DUP64	WT	4	3.66347	minus3
DUP64	WT	4	7.03353	minus3
DUP64	WT	4	4.61454	minus3
DUP64	WT	4	3.03333	minus3
DUP64	WT	4	7.62026	minus3
DUP64	WT	4	5.4099	minus3
DUP64	WT	4	7.46638	minus3
DUP64	WT	4	1.82182	minus3
DUP64	WT	4	18.3415	minus3
DUP64	WT	4	1.68644	minus3
DUP64	WT	4	7.86877	minus3
DUP64	WT	4	1.47239	minus3
DUP64	WT	4	3.31373	minus3
DUP64	WT	4	3.22163	minus3
DUP64	WT	4	5.0572	minus3
DUP64	WT	4	2.43674	minus3
DUP64	WT	4	2.49384	minus3
DUP64	WT	4	1.29826	minus4
DUP64	WT	4	1.07478	minus4
DUP64	WT	4	0.934189	minus4
DUP64	WT	4	1.12365	minus4
DUP64	WT	4	1.02478	minus4
DUP64	WT	4	2.10522	minus4
DUP64	WT	4	1.3758	minus4
DUP64	WT	4	1.69628	minus4
DUP64	WT	4	1.11153	minus4
DUP64	WT	4	1.39755	minus4
DUP64	WT	4	4.63241	minus4
DUP64	WT	4	3.27846	minus4
DUP64	WT	4	1.35387	minus4
DUP64	WT	4	0.880404	minus4
DUP64	WT	4	1.06239	minus4
DUP64	WT	4	7.57379	minus4
DUP64	WT	4	2.08753	minus4
DUP64	WT	4	1.06239	minus4
DUP64	WT	4	2.5663	minus4
DUP64	WT	4	1.07478	minus4
DUP64	WT	4	5.36576	minus4
DUP64	WT	4	5.51947	minus4
DUP64	WT	4	3.41844	minus4
DUP64	WT	4	2.00697	minus4
DUP64	WT	4	4.54272	minus4
DUP64	WT	4	2.77016	minus4
DUP64	WT	4	1.7159	minus4
DUP64	WT	4	4.17463	minus4
DUP64	WT	4	2.70047	minus4
DUP64	WT	4	6.29933	minus4
DUP64	WT	4	3.58949	minus4
DUP64	WT	4	1.98885	minus4
DUP64	WT	4	1.8028	minus4
DUP64	WT	4	2.63776	minus4
DUP64	WT	4	3.15708	minus4
DUP64	WT	4	5.29364	minus4
DUP64	WT	4	2.59818	minus4
DUP64	WT	4	2.11404	minus4
DUP64	WT	4	1.39755	minus4
DUP64	WT	4	5.62797	minus4
DUP64	WT	4	3.74994	minus4
DUP64	WT	4	1.96151	minus4
DUP64	WT	4	5.60635	minus4
DUP64	WT	4	2.38726	minus4
DUP64	WT	4	1.69628	minus4
DUP64	WT	4	3.32076	minus4
DUP64	WT	4	5.7941	minus4
DUP64	WT	4	2.922	minus4
DUP64	WT	4	3.51474	minus4
DUP64	WT	4	1.72566	minus4
DUP64	WT	4	13.1066	minus4
DUP64	WT	4	2.20985	minus4
DUP64	WT	4	2.95934	minus4
DUP64	WT	4	1.09935	minus4
DUP64	WT	4	1.36486	minus4
DUP64	WT	4	2.81614	minus4
DUP64	WT	4	4.15581	minus4
DUP64	WT	4	2.46945	minus4
DUP64	WT	4	4.14323	minus4
DUP64	WT	4	2.51003	minus4
DUP64	WT	4	2.5663	minus4
DUP64	WT	4	2.89948	minus4
DUP64	WT	4	1.60659	minus4
DUP64	WT	4	3.86155	minus4
DUP64	WT	4	8.57015	minus4
DUP64	WT	4	1.7159	minus4
DUP64	WT	4	3.60974	minus4
DUP64	WT	4	4.89645	minus4
DUP64	WT	4	3.65677	minus4
DUP64	WT	4	2.39554	minus4
DUP64	WT	4	1.26432	minus4
DUP64	WT	4	3.90703	minus4
DUP64	WT	4	10.2331	minus4
DUP64	WT	4	4.43999	minus4
DUP64	WT	4	3.39067	minus4
DUP64	WT	4	1.81232	minus4
DUP64	WT	4	2.70047	minus4
DUP64	WT	4	3.65007	minus4
DUP64	WT	4	1.61668	minus4
DUP64	WT	4	6.30953	minus4
DUP64	WT	4	3.00384	minus4
DUP64	WT	4	1.61668	minus4
DUP64	WT	4	2.86175	minus4
DUP64	WT	4	3.45298	minus4
DUP64	WT	5	2.26125	minus2
DUP64	WT	5	0.563188	minus2
DUP64	WT	5	0.767507	minus2
DUP64	WT	5	0.81076	minus2
DUP64	WT	5	0.436282	minus2
DUP64	WT	5	0.737983	minus2
DUP64	WT	5	1.1357	minus2
DUP64	WT	5	0.661418	minus2
DUP64	WT	5	2.22705	minus2
DUP64	WT	5	0.894001	minus2
DUP64	WT	5	0.629535	minus2
DUP64	WT	5	1.99792	minus2
DUP64	WT	5	1.0871	minus2
DUP64	WT	5	0.707856	minus2
DUP64	WT	5	0.416669	minus2
DUP64	WT	5	1.21834	minus2
DUP64	WT	5	1.94318	minus2
DUP64	WT	5	0.986467	minus2
DUP64	WT	5	0.947393	minus2
DUP64	WT	5	0.752817	minus2
DUP64	WT	5	0.375977	minus2
DUP64	WT	5	0.880404	minus2
DUP64	WT	5	0.629535	minus2
DUP64	WT	5	0.986467	minus2
DUP64	WT	5	0.838964	minus2
DUP64	WT	5	1.35387	minus2
DUP64	WT	5	0.722998	minus2
DUP64	WT	5	0.629535	minus2
DUP64	WT	5	0.99932	minus2
DUP64	WT	5	0.629535	minus2
DUP64	WT	5	0.236852	minus2
DUP64	WT	5	0.767507	minus2
DUP64	WT	5	1.11153	minus2
DUP64	WT	5	1.60659	minus2
DUP64	WT	5	3.99082	minus2
DUP64	WT	5	0.722998	minus2
DUP64	WT	5	1.49342	minus2
DUP64	WT	5	3.64336	minus2
DUP64	WT	5	0.613288	minus2
DUP64	WT	5	0.752817	minus2
DUP64	WT	5	0.596823	minus2
DUP64	WT	5	0.661418	minus2
DUP64	WT	5	1.42986	minus2
DUP64	WT	5	2.05192	minus2
DUP64	WT	5	0.692551	minus2
DUP64	WT	5	0.692551	minus2
DUP64	WT	5	0.722998	minus2
DUP64	WT	5	0.354788	minus2
DUP64	WT	5	0.262486	minus2
DUP64	WT	5	0.262486	minus2
DUP64	WT	5	0.645575	minus2
DUP64	WT	5	0.986467	minus2
DUP64	WT	5	3.29259	minus2
DUP64	WT	5	0.852889	minus2
DUP64	WT	5	1.66665	minus2
DUP64	WT	5	0.986467	minus2
DUP64	WT	5	0.416669	minus2
DUP64	WT	5	8.04132	minus2
DUP64	WT	5	0.563188	minus2
DUP64	WT	5	0.474247	minus2
DUP64	WT	5	0.737983	minus2
DUP64	WT	5	0.613288	minus2
DUP64	WT	5	0.661418	minus2
DUP64	WT	5	0.707856	minus2
DUP64	WT	5	0.752817	minus2
DUP64	WT	5	0.661418	minus2
DUP64	WT	5	0.436282	minus2
DUP64	WT	5	1.99792	minus2
DUP64	WT	5	0.767507	minus2
DUP64	WT	5	0.722998	minus2
DUP64	WT	5	0.54599	minus2
DUP64	WT	5	5.73008	minus2
DUP64	WT	5	0.54599	minus2
DUP64	WT	5	0.692551	minus2
DUP64	WT	5	1.2067	minus2
DUP64	WT	5	8.62693	minus2
DUP64	WT	5	0.907496	minus2
DUP64	WT	5	0.838964	minus2
DUP64	WT	5	0.492667	minus2
DUP64	WT	5	0.528516	minus2
DUP64	WT	5	0.180752	minus2
DUP64	WT	5	0.567493	minus2
DUP64	WT	5	0.677074	minus2
DUP64	WT	5	0.332946	minus2
DUP64	WT	5	0.97353	minus2
DUP64	WT	5	0.866701	minus2
DUP64	WT	5	1.15961	minus2
DUP64	WT	5	0.354788	minus2
DUP64	WT	5	0.510749	minus2
DUP64	WT	5	0.707856	minus2
DUP64	WT	5	0.722998	minus2
DUP64	WT	5	6.72591	minus2
DUP64	WT	5	5.50311	minus2
DUP64	WT	5	0.375977	minus2
DUP64	WT	5	2.73156	minus2
DUP64	WT	5	0.81076	minus2
DUP64	WT	5	0.455462	minus2
DUP64	WT	5	0.332946	minus2
DUP64	WT	5	0.613288	minus2
DUP64	WT	5	3.92645	minus2
DUP64	WT	5	0.492667	minus2
DUP64	WT	5	0.567493	minus2
DUP64	WT	5	1.58631	minus2
DUP64	WT	5	0.262486	minus2
DUP64	WT	5	1.56591	minus2
DUP64	WT	5	0.236852	minus2
DUP64	WT	5	4.90802	minus2
DUP64	WT	5	0.396584	minus2
DUP64	WT	5	4.28052	minus2
DUP64	WT	5	0.375977	minus2
DUP64	WT	5	3.32076	minus2
DUP64	WT	5	5.21542	minus2
DUP64	WT	5	5.59011	minus2
DUP64	WT	5	0.796473	minus2
DUP64	WT	5	0.332946	minus2
DUP64	WT	5	0.416669	minus2
DUP64	WT	5	1.49342	minus2
DUP64	WT	5	0.580127	minus2
DUP64	WT	5	0.767507	minus2
DUP64	WT	5	0.436282	minus2
DUP64	WT	5	1.0871	minus2
DUP64	WT	5	11.8186	minus2
DUP64	WT	5	2.32048	minus2
DUP64	WT	5	1.30948	minus2
DUP64	WT	5	0.920891	minus2
DUP64	WT	5	2.32888	minus2
DUP64	WT	5	1.40836	minus2
DUP64	WT	5	4.16836	minus2
DUP64	WT	5	0.692551	minus2
DUP64	WT	5	0.492667	minus2
DUP64	WT	5	1.03739	minus2
DUP64	WT	5	2.22705	minus2
DUP64	WT	5	4.09274	minus2
DUP64	WT	5	0.492667	minus2
DUP64	WT	5	1.2529	minus2
DUP64	WT	5	0.567493	minus2
DUP64	WT	5	3.2643	minus2
DUP64	WT	5	0.262486	minus2
DUP64	WT	5	1.32064	minus2
DUP64	WT	5	0.180752	minus2
DUP64	WT	5	7.26345	minus2
DUP64	WT	5	4.36675	minus2
DUP64	WT	5	5.29364	minus2
DUP64	WT	5	1.39755	minus2
DUP64	WT	5	3.18585	minus2
DUP64	WT	5	2.7238	minus2
DUP64	WT	5	0.113867	minus2
DUP64	WT	5	6.39591	minus2
DUP64	WT	5	9.19329	minus2
DUP64	WT	5	2.04297	minus2
DUP64	WT	5	0.986467	minus2
DUP64	WT	5	0.767507	minus2
DUP64	WT	5	2.11404	minus2
DUP64	WT	5	6.94634	minus2
DUP64	WT	5	0.567493	minus2
DUP64	WT	5	0.752817	minus2
DUP64	WT	5	2.51003	minus2
DUP64	WT	5	0.960506	minus2
DUP64	WT	5	0.474247	minus2
DUP64	WT	5	1.287	minus2
DUP64	WT	5	1.88765	minus2
DUP64	WT	5	0.375977	minus2
DUP64	WT	5	0.286925	minus2
DUP64	WT	5	2.80851	minus2
DUP64	WT	5	0.492667	minus2
DUP64	WT	5	0.880404	minus3
DUP64	WT	5	1.07478	minus3
DUP64	WT	5	1.0871	minus3
DUP64	WT	5	1.22991	minus3
DUP64	WT	5	1.15961	minus3
DUP64	WT	5	0.824922	minus3
DUP64	WT	5	0.97353	minus3
DUP64	WT	5	1.22991	minus3
DUP64	WT	5	1.06239	minus3
DUP64	WT	5	1.24143	minus3
DUP64	WT	5	1.49342	minus3
DUP64	WT	5	0.824922	minus3
DUP64	WT	5	1.03739	minus3
DUP64	WT	5	0.824922	minus3
DUP64	WT	5	0.907496	minus3
DUP64	WT	5	1.47239	minus3
DUP64	WT	5	0.99932	minus3
DUP64	WT	5	1.53506	minus3
DUP64	WT	5	1.18327	minus3
DUP64	WT	5	1.09935	minus3
DUP64	WT	5	3.94581	minus3
DUP64	WT	5	0.880404	minus3
DUP64	WT	5	0.838964	minus3
DUP64	WT	5	1.02478	minus3
DUP64	WT	5	1.06239	minus3
DUP64	WT	5	16.9107	minus3
DUP64	WT	5	1.96151	minus3
DUP64	WT	5	1.61668	minus3
DUP64	WT	5	0.866701	minus3
DUP64	WT	5	1.30948	minus3
DUP64	WT	5	0.838964	minus3
DUP64	WT	5	1.86896	minus3
DUP64	WT	5	1.12365	minus3
DUP64	WT	5	1.84075	minus3
DUP64	WT	5	0.99932	minus3
DUP64	WT	5	1.85018	minus3
DUP64	WT	5	4.42174	minus3
DUP64	WT	5	1.11153	minus3
DUP64	WT	5	0.838964	minus3
DUP64	WT	5	1.19502	minus3
DUP64	WT	5	0.960506	minus3
DUP64	WT	5	1.11153	minus3
DUP64	WT	5	0.934189	minus3
DUP64	WT	5	1.19502	minus3
DUP64	WT	5	1.22991	minus3
DUP64	WT	5	1.68644	minus3
DUP64	WT	5	3.82889	minus3
DUP64	WT	5	1.1357	minus3
DUP64	WT	5	2.52617	minus3
DUP64	WT	5	1.09935	minus3
DUP64	WT	5	6.83412	minus3
DUP64	WT	5	0.81076	minus3
DUP64	WT	5	1.03739	minus3
DUP64	WT	5	0.722998	minus3
DUP64	WT	5	2.016	minus3
DUP64	WT	5	3.31373	minus3
DUP64	WT	5	0.880404	minus3
DUP64	WT	5	1.27568	minus3
DUP64	WT	5	1.47239	minus3
DUP64	WT	5	2.22705	minus3
DUP64	WT	5	1.88765	minus3
DUP64	WT	5	0.960506	minus3
DUP64	WT	5	1.7061	minus3
DUP64	WT	5	4.48848	minus3
DUP64	WT	5	4.89066	minus3
DUP64	WT	5	1.12365	minus3
DUP64	WT	5	3.13542	minus3
DUP64	WT	5	2.21846	minus3
DUP64	WT	5	0.752817	minus3
DUP64	WT	5	2.75475	minus3
DUP64	WT	5	0.838964	minus3
DUP64	WT	5	4.33605	minus3
DUP64	WT	5	0.796473	minus3
DUP64	WT	5	1.15961	minus3
DUP64	WT	5	0.907496	minus3
DUP64	WT	5	4.9484	minus3
DUP64	WT	5	7.63417	minus3
DUP64	WT	5	0.866701	minus3
DUP64	WT	5	5.27136	minus3
DUP64	WT	5	11.0651	minus3
DUP64	WT	5	2.04297	minus3
DUP64	WT	5	1.33177	minus3
DUP64	WT	5	4.79756	minus3
DUP64	WT	5	3.65677	minus3
DUP64	WT	5	4.56073	minus3
DUP64	WT	5	2.016	minus3
DUP64	WT	5	3.51474	minus3
DUP64	WT	5	1.59647	minus3
DUP64	WT	5	4.81509	minus3
DUP64	WT	5	0.81076	minus3
DUP64	WT	5	1.40836	minus3
DUP64	WT	5	0.947393	minus3
DUP64	WT	5	5.23783	minus3
DUP64	WT	5	1.09935	minus3
DUP64	WT	5	22.4548	minus3
DUP64	WT	5	1.15961	minus3
DUP64	WT	5	2.37896	minus3
DUP64	WT	5	1.40836	minus3
DUP64	WT	5	1.58631	minus3
DUP64	WT	5	5.55213	minus3
DUP64	WT	5	0.880404	minus3
DUP64	WT	5	7.09136	minus3
DUP64	WT	5	8.13139	minus3
DUP64	WT	5	4.379	minus3
DUP64	WT	5	0.960506	minus3
DUP64	WT	5	4.12434	minus3
DUP64	WT	5	0.474247	minus4
DUP64	WT	5	1.39755	minus4
DUP64	WT	5	1.03739	minus4
DUP64	WT	5	1.04993	minus4
DUP64	WT	5	1.36486	minus4
DUP64	WT	5	1.7451	minus4
DUP64	WT	5	0.934189	minus4
DUP64	WT	5	1.14768	minus4
DUP64	WT	5	1.41913	minus4
DUP64	WT	5	1.82182	minus4
DUP64	WT	5	0.99932	minus4
DUP64	WT	5	1.51431	minus4
DUP64	WT	5	7.35346	minus4
DUP64	WT	5	5.49218	minus4
DUP64	WT	5	1.41913	minus4
DUP64	WT	5	3.41151	minus4
DUP64	WT	5	1.15961	minus4
DUP64	WT	5	7.34874	minus4
DUP64	WT	5	1.41913	minus4
DUP64	WT	5	1.61668	minus4
DUP64	WT	5	1.11153	minus4
DUP64	WT	5	0.880404	minus4
DUP64	WT	5	1.41913	minus4
DUP64	WT	5	1.17147	minus4
DUP64	WT	5	1.14768	minus4
DUP64	WT	5	1.06239	minus4
DUP64	WT	5	1.19502	minus4
DUP64	WT	5	1.18327	minus4
DUP64	WT	5	2.13162	minus4
DUP64	WT	5	1.14768	minus4
DUP64	WT	5	1.95235	minus4
DUP64	WT	5	2.27825	minus4
DUP64	WT	5	1.77407	minus4
DUP64	WT	5	14.496	minus4
DUP64	WT	5	2.95934	minus4
DUP64	WT	5	10.4164	minus4
DUP64	WT	5	1.54537	minus4
DUP64	WT	5	15.3971	minus4
DUP64	WT	5	12.3272	minus4
DUP64	WT	5	1.86896	minus4
DUP64	WT	5	16.2979	minus4
DUP64	WT	5	1.57613	minus4
DUP64	WT	5	1.68644	minus4
DUP64	WT	5	1.42986	minus4
DUP64	WT	5	1.12365	minus4
DUP64	WT	5	4.19967	minus4
DUP64	WT	5	1.14768	minus4
DUP64	WT	5	1.0871	minus4
DUP64	WT	5	1.36486	minus4
DUP64	WT	5	2.06085	minus4
DUP64	WT	5	1.27568	minus4
DUP64	WT	5	1.287	minus4
DUP64	WT	5	0.960506	minus4
DUP64	WT	5	0.947393	minus4
DUP64	WT	5	2.24418	minus4
DUP64	WT	5	5.95788	minus4
DUP64	WT	5	7.192	minus4
DUP64	WT	5	2.86931	minus4
DUP64	WT	5	4.23086	minus4
DUP64	WT	5	11.1535	minus4
DUP64	WT	5	0.960506	minus4
DUP64	WT	5	7.7726	minus4
DUP64	WT	5	9.7304	minus4
DUP64	WT	5	5.68719	minus4
DUP64	WT	5	2.7932	minus4
DUP64	WT	5	1.73539	minus4
DUP64	WT	5	1.30948	minus4
DUP64	WT	5	3.3628	minus4
DUP64	WT	5	2.07865	minus4
DUP64	WT	5	1.44055	minus4
DUP64	WT	5	2.88442	minus4
DUP64	WT	5	2.922	minus4
DUP64	WT	5	1.01209	minus4
DUP64	WT	5	2.70047	minus4
DUP64	WT	5	1.36486	minus4
DUP64	WT	5	6.07796	minus4
DUP64	WT	5	1.86896	minus4
DUP64	WT	5	10.751	minus4
DUP64	WT	5	7.2872	minus4
DUP64	WT	5	4.67397	minus4
DUP64	WT	5	2.46129	minus4
DUP64	WT	5	3.59624	minus4
DUP64	WT	5	2.26125	minus4
DUP64	WT	5	2.32888	minus4
DUP64	WT	5	1.27568	minus4
DUP64	WT	5	14.405	minus4
DUP64	WT	5	9.45751	minus4
DUP64	WT	5	5.92636	minus4
DUP64	WT	5	2.06976	minus4
DUP64	WT	5	2.90699	minus4
DUP64	WT	5	2.02501	minus4
DUP64	WT	5	3.51474	minus4
DUP64	WT	5	2.17525	minus4
DUP64	WT	5	3.90703	minus4
DUP64	WT	5	2.32048	minus4
DUP64	WT	5	4.34835	minus4
DUP64	WT	5	3.04068	minus4
DUP64	WT	5	1.97064	minus4
DUP64	WT	5	1.29826	minus4
DUP64	WT	5	3.74332	minus4
DUP64	WT	5	3.49422	minus4
DUP64	WT	5	5.16483	minus4
DUP64	WT	5	6.44645	minus4
DUP64	WT	5	8.78752	minus4
DUP64	WT	5	3.99082	minus4
DUP64	WT	5	3.30669	minus4
DUP64	WT	5	2.12284	minus4
DUP64	WT	5	1.35387	minus4
DUP64	WT	5	2.33726	minus4
DUP64	WT	5	1.46182	minus4
DUP64	WT	5	1.26432	minus4
DUP64	WT	6	0.97353	minus2
DUP64	WT	6	1.17147	minus2
DUP64	WT	6	0.97353	minus2
DUP64	WT	6	1.06239	minus2
DUP64	WT	6	1.33177	minus2
DUP64	WT	6	1.09935	minus2
DUP64	WT	6	2.28672	minus2
DUP64	WT	6	1.3758	minus2
DUP64	WT	6	1.54537	minus2
DUP64	WT	6	1.46182	minus2
DUP64	WT	6	1.27568	minus2
DUP64	WT	6	1.38669	minus2
DUP64	WT	6	1.47239	minus2
DUP64	WT	6	1.1357	minus2
DUP64	WT	6	1.1357	minus2
DUP64	WT	6	1.50389	minus2
DUP64	WT	6	1.53506	minus2
DUP64	WT	6	1.7061	minus2
DUP64	WT	6	1.55566	minus2
DUP64	WT	6	1.11153	minus2
DUP64	WT	6	1.21834	minus2
DUP64	WT	6	1.19502	minus2
DUP64	WT	6	1.69628	minus2
DUP64	WT	6	1.22991	minus2
DUP64	WT	6	1.09935	minus2
DUP64	WT	6	1.2067	minus2
DUP64	WT	6	1.04993	minus2
DUP64	WT	6	1.44055	minus2
DUP64	WT	6	2.18393	minus2
DUP64	WT	6	1.35387	minus2
DUP64	WT	6	1.63676	minus2
DUP64	WT	6	1.95235	minus2
DUP64	WT	6	1.62673	minus2
DUP64	WT	6	1.97976	minus2
DUP64	WT	6	1.34284	minus2
DUP64	WT	6	1.34284	minus2
DUP64	WT	6	1.34284	minus2
DUP64	WT	6	3.243	minus2
DUP64	WT	6	1.57613	minus2
DUP64	WT	6	3.65007	minus2
DUP64	WT	6	1.49342	minus2
DUP64	WT	6	1.30948	minus2
DUP64	WT	6	1.33177	minus2
DUP64	WT	6	2.13162	minus2
DUP64	WT	6	1.61668	minus2
DUP64	WT	6	1.12365	minus2
DUP64	WT	6	3.7367	minus2
DUP64	WT	6	1.60659	minus2
DUP64	WT	6	0.907496	minus2
DUP64	WT	6	1.24143	minus2
DUP64	WT	6	1.06239	minus2
DUP64	WT	6	1.94318	minus2
DUP64	WT	6	1.0871	minus2
DUP64	WT	6	1.82182	minus2
DUP64	WT	6	1.5247	minus2
DUP64	WT	6	2.04297	minus2
DUP64	WT	6	1.36486	minus2
DUP64	WT	6	1.95235	minus2
DUP64	WT	6	1.04993	minus2
DUP64	WT	6	1.96151	minus2
DUP64	WT	6	1.29826	minus2
DUP64	WT	6	1.12365	minus2
DUP64	WT	6	1.26432	minus2
DUP64	WT	6	1.06239	minus2
DUP64	WT	6	1.46182	minus2
DUP64	WT	6	1.01209	minus2
DUP64	WT	6	1.35387	minus2
DUP64	WT	6	1.29826	minus2
DUP64	WT	6	2.13162	minus2
DUP64	WT	6	0.866701	minus2
DUP64	WT	6	1.0871	minus2
DUP64	WT	6	0.97353	minus2
DUP64	WT	6	1.27568	minus2
DUP64	WT	6	1.27568	minus2
DUP64	WT	6	3.17867	minus2
DUP64	WT	6	2.35399	minus2
DUP64	WT	6	1.7061	minus2
DUP64	WT	6	1.54537	minus2
DUP64	WT	6	1.49342	minus2
DUP64	WT	6	2.70826	minus2
DUP64	WT	6	0.986467	minus2
DUP64	WT	6	2.19259	minus2
DUP64	WT	6	1.81232	minus2
DUP64	WT	6	2.13162	minus2
DUP64	WT	6	1.2067	minus2
DUP64	WT	6	1.07478	minus2
DUP64	WT	6	1.03739	minus2
DUP64	WT	6	2.00697	minus2
DUP64	WT	6	1.19502	minus2
DUP64	WT	6	0.920891	minus2
DUP64	WT	6	1.02478	minus2
DUP64	WT	6	1.42986	minus2
DUP64	WT	6	4.62646	minus2
DUP64	WT	6	1.35387	minus2
DUP64	WT	6	1.11153	minus2
DUP64	WT	6	1.53506	minus2
DUP64	WT	6	2.42853	minus2
DUP64	WT	6	2.45312	minus2
DUP64	WT	6	14.0963	minus2
DUP64	WT	6	1.77407	minus2
DUP64	WT	6	1.88765	minus2
DUP64	WT	6	5.00009	minus2
DUP64	WT	6	1.22991	minus2
DUP64	WT	6	1.12365	minus2
DUP64	WT	6	1.19502	minus2
DUP64	WT	6	2.47759	minus2
DUP64	WT	6	6.4515	minus2
DUP64	WT	6	2.23562	minus2
DUP64	WT	6	2.80851	minus2
DUP64	WT	6	1.67656	minus2
DUP64	WT	6	2.50194	minus2
DUP64	WT	6	1.17147	minus2
DUP64	WT	6	4.9484	minus2
DUP64	WT	6	1.18327	minus2
DUP64	WT	6	1.59647	minus2
DUP64	WT	6	2.22705	minus2
DUP64	WT	6	1.51431	minus2
DUP64	WT	6	1.26432	minus2
DUP64	WT	6	0.99932	minus2
DUP64	WT	6	3.76316	minus2
DUP64	WT	6	13.9527	minus2
DUP64	WT	6	2.98163	minus2
DUP64	WT	6	1.287	minus2
DUP64	WT	6	1.15961	minus2
DUP64	WT	6	1.73539	minus2
DUP64	WT	6	1.46182	minus2
DUP64	WT	6	1.56591	minus2
DUP64	WT	6	1.55566	minus2
DUP64	WT	6	1.01209	minus2
DUP64	WT	6	1.67656	minus2
DUP64	WT	6	2.51003	minus2
DUP64	WT	6	1.17147	minus2
DUP64	WT	6	1.24143	minus2
DUP64	WT	6	1.62673	minus2
DUP64	WT	6	2.54226	minus2
DUP64	WT	6	1.21834	minus2
DUP64	WT	6	4.80341	minus2
DUP64	WT	6	2.45312	minus2
DUP64	WT	6	1.18327	minus2
DUP64	WT	6	9.49495	minus2
DUP64	WT	6	1.4512	minus2
DUP64	WT	6	1.27568	minus2
DUP64	WT	6	1.26432	minus2
DUP64	WT	6	4.48243	minus2
DUP64	WT	6	10.7939	minus2
DUP64	WT	6	2.9145	minus2
DUP64	WT	6	1.01209	minus2
DUP64	WT	6	8.39426	minus2
DUP64	WT	6	2.74703	minus2
DUP64	WT	6	1.2067	minus2
DUP64	WT	6	1.17147	minus2
DUP64	WT	6	4.79171	minus2
DUP64	WT	6	1.57613	minus2
DUP64	WT	6	1.40836	minus2
DUP64	WT	6	2.55029	minus2
DUP64	WT	6	1.11153	minus2
DUP64	WT	6	2.37065	minus2
DUP64	WT	6	5.67645	minus2
DUP64	WT	6	4.04194	minus2
DUP64	WT	6	3.91998	minus2
DUP64	WT	6	7.34874	minus2
DUP64	WT	6	1.06239	minus2
DUP64	WT	6	1.95235	minus2
DUP64	WT	6	7.66196	minus2
DUP64	WT	6	2.37065	minus2
DUP64	WT	6	1.03739	minus2
DUP64	WT	6	1.29826	minus2
DUP64	WT	6	1.42986	minus2
DUP64	WT	6	1.36486	minus2
DUP64	WT	6	2.04297	minus2
DUP64	WT	6	1.78367	minus2
DUP64	WT	6	3.36978	minus2
DUP64	WT	6	3.71016	minus2
DUP64	WT	6	2.67704	minus2
DUP64	WT	6	3.93936	minus2
DUP64	WT	6	1.3758	minus2
DUP64	WT	6	5.27136	minus2
DUP64	WT	6	4.74479	minus2
DUP64	WT	6	5.86306	minus2
DUP64	WT	6	2.5583	minus2
DUP64	WT	6	7.61562	minus2
DUP64	WT	6	1.17147	minus2
DUP64	WT	6	1.89696	minus2
DUP64	WT	6	4.02919	minus2
DUP64	WT	6	2.31206	minus2
DUP64	WT	6	1.82182	minus2
DUP64	WT	6	3.3348	minus2
DUP64	WT	6	2.05192	minus2
DUP64	WT	6	5.15355	minus2
DUP64	WT	6	1.61668	minus2
DUP64	WT	6	2.77016	minus2
DUP64	WT	6	1.29826	minus2
DUP64	WT	6	1.27568	minus2
DUP64	WT	6	1.61668	minus2
DUP64	WT	6	2.47759	minus2
DUP64	WT	6	4.51263	minus2
DUP64	WT	6	1.7159	minus2
DUP64	WT	6	1.2529	minus2
DUP64	WT	6	2.47759	minus2
DUP64	WT	6	1.62673	minus2
DUP64	WT	6	4.82092	minus2
DUP64	WT	6	4.96566	minus2
DUP64	WT	6	3.86806	minus2
DUP64	WT	6	7.01904	minus2
DUP64	WT	6	3.65677	minus2
DUP64	WT	6	1.46182	minus2
DUP64	WT	6	3.03333	minus2
DUP64	WT	6	1.81232	minus2
DUP64	WT	6	2.19259	minus2
DUP64	WT	6	1.76444	minus2
DUP64	WT	6	1.92476	minus2
DUP64	WT	6	2.07865	minus2
DUP64	WT	6	1.24143	minus2
DUP64	WT	6	1.12365	minus3
DUP64	WT	6	0.852889	minus3
DUP64	WT	6	0.907496	minus3
DUP64	WT	6	0.880404	minus3
DUP64	WT	6	1.01209	minus3
DUP64	WT	6	0.960506	minus3
DUP64	WT	6	0.852889	minus3
DUP64	WT	6	0.81076	minus3
DUP64	WT	6	0.97353	minus3
DUP64	WT	6	0.852889	minus3
DUP64	WT	6	0.852889	minus3
DUP64	WT	6	0.752817	minus3
DUP64	WT	6	0.824922	minus3
DUP64	WT	6	1.34284	minus3
DUP64	WT	6	1.1357	minus3
DUP64	WT	6	1.06239	minus3
DUP64	WT	6	1.14768	minus3
DUP64	WT	6	1.09935	minus3
DUP64	WT	6	1.2529	minus3
DUP64	WT	6	1.01209	minus3
DUP64	WT	6	1.84075	minus3
DUP64	WT	6	0.97353	minus3
DUP64	WT	6	0.866701	minus3
DUP64	WT	6	2.96678	minus3
DUP64	WT	6	1.36486	minus3
DUP64	WT	6	1.0871	minus3
DUP64	WT	6	1.2067	minus3
DUP64	WT	6	1.09935	minus3
DUP64	WT	6	1.15961	minus3
DUP64	WT	6	0.947393	minus3
DUP64	WT	6	6.60189	minus3
DUP64	WT	6	13.0535	minus3
DUP64	WT	6	2.73156	minus3
DUP64	WT	6	7.43823	minus3
DUP64	WT	6	1.12365	minus3
DUP64	WT	6	4.38512	minus3
DUP64	WT	6	0.866701	minus3
DUP64	WT	6	1.17147	minus3
DUP64	WT	6	1.50389	minus3
DUP64	WT	6	6.08834	minus3
DUP64	WT	6	0.934189	minus3
DUP64	WT	6	0.880404	minus3
DUP64	WT	6	0.824922	minus3
DUP64	WT	6	11.0111	minus3
DUP64	WT	6	1.2067	minus3
DUP64	WT	6	0.782057	minus3
DUP64	WT	6	2.33726	minus3
DUP64	WT	6	3.54881	minus3
DUP64	WT	6	0.838964	minus3
DUP64	WT	6	1.77407	minus3
DUP64	WT	6	0.934189	minus3
DUP64	WT	6	1.33177	minus3
DUP64	WT	6	1.40836	minus3
DUP64	WT	6	1.65672	minus3
DUP64	WT	6	1.29826	minus3
DUP64	WT	6	0.81076	minus3
DUP64	WT	6	1.01209	minus3
DUP64	WT	6	0.852889	minus3
DUP64	WT	6	0.920891	minus3
DUP64	WT	6	1.19502	minus3
DUP64	WT	6	1.56591	minus3
DUP64	WT	6	0.767507	minus3
DUP64	WT	6	1.07478	minus3
DUP64	WT	6	1.67656	minus3
DUP64	WT	6	2.96678	minus3
DUP64	WT	6	1.51431	minus3
DUP64	WT	6	1.7159	minus3
DUP64	WT	6	5.36023	minus3
DUP64	WT	6	3.31373	minus3
DUP64	WT	6	4.60858	minus3
DUP64	WT	6	2.7393	minus3
DUP64	WT	6	1.17147	minus3
DUP64	WT	6	2.98163	minus3
DUP64	WT	6	1.88765	minus3
DUP64	WT	6	4.86747	minus3
DUP64	WT	6	1.287	minus3
DUP64	WT	6	1.09935	minus3
DUP64	WT	6	2.5663	minus3
DUP64	WT	6	1.22991	minus3
DUP64	WT	6	4.74479	minus3
DUP64	WT	6	1.5247	minus3
DUP64	WT	6	5.93688	minus3
DUP64	WT	6	2.59818	minus3
DUP64	WT	6	2.4203	minus3
DUP64	WT	6	2.77785	minus3
DUP64	WT	6	7.19677	minus3
DUP64	WT	6	1.73539	minus3
DUP64	WT	6	1.85958	minus3
DUP64	WT	6	6.73579	minus3
DUP64	WT	6	2.32888	minus3
DUP64	WT	6	13.4056	minus3
DUP64	WT	6	11.5035	minus3
DUP64	WT	6	0.880404	minus3
DUP64	WT	6	1.41913	minus3
DUP64	WT	6	3.88757	minus3
DUP64	WT	6	5.38234	minus3
DUP64	WT	6	3.73008	minus3
DUP64	WT	6	2.7238	minus3
DUP64	WT	6	5.12531	minus3
DUP64	WT	6	0.920891	minus3
DUP64	WT	6	2.53422	minus3
DUP64	WT	6	0.866701	minus3
DUP64	WT	6	0.960506	minus3
DUP64	WT	6	2.18393	minus3
DUP64	WT	6	2.05192	minus3
DUP64	WT	6	1.12365	minus3
DUP64	WT	6	1.85018	minus3
DUP64	WT	6	1.86896	minus3
DUP64	WT	6	6.78996	minus3
DUP64	WT	6	2.5583	minus3
DUP64	WT	6	4.62646	minus3
DUP64	WT	6	3.64336	minus3
DUP64	WT	6	3.04068	minus3
DUP64	WT	6	1.2067	minus3
DUP64	WT	6	2.39554	minus3
DUP64	WT	6	2.14913	minus3
DUP64	WT	6	2.14913	minus3
DUP64	WT	6	4.48243	minus3
DUP64	WT	6	1.63676	minus3
DUP64	WT	6	2.51003	minus3
DUP64	WT	6	5.57385	minus3
DUP64	WT	6	0.852889	minus3
DUP64	WT	6	0.986467	minus3
DUP64	WT	6	8.90807	minus3
DUP64	WT	6	0.907496	minus3
DUP64	WT	6	0.692551	minus4
DUP64	WT	6	1.09935	minus4
DUP64	WT	6	0.960506	minus4
DUP64	WT	6	0.782057	minus4
DUP64	WT	6	0.907496	minus4
DUP64	WT	6	0.354788	minus4
DUP64	WT	6	0.752817	minus4
DUP64	WT	6	0.510749	minus4
DUP64	WT	6	1.54537	minus4
DUP64	WT	6	0.907496	minus4
DUP64	WT	6	1.21834	minus4
DUP64	WT	6	0.752817	minus4
DUP64	WT	6	0.563188	minus4
DUP64	WT	6	4.36675	minus4
DUP64	WT	6	0.455462	minus4
DUP64	WT	6	0.960506	minus4
DUP64	WT	6	0.661418	minus4
DUP64	WT	6	1.09935	minus4
DUP64	WT	6	0.796473	minus4
DUP64	WT	6	1.81232	minus4
DUP64	WT	6	0.894001	minus4
DUP64	WT	6	0.54599	minus4
DUP64	WT	6	0.707856	minus4
DUP64	WT	6	0.880404	minus4
DUP64	WT	6	1.29826	minus4
DUP64	WT	6	0.396584	minus4
DUP64	WT	6	0.629535	minus4
DUP64	WT	6	0.81076	minus4
DUP64	WT	6	0.907496	minus4
DUP64	WT	6	2.57429	minus4
DUP64	WT	6	0.767507	minus4
DUP64	WT	6	2.06085	minus4
DUP64	WT	6	0.677074	minus4
DUP64	WT	6	0.528516	minus4
DUP64	WT	6	0.436282	minus4
DUP64	WT	6	1.14768	minus4
DUP64	WT	6	0.907496	minus4
DUP64	WT	6	0.692551	minus4
DUP64	WT	6	0.692551	minus4
DUP64	WT	6	0.692551	minus4
DUP64	WT	6	0.986467	minus4
DUP64	WT	6	0.947393	minus4
DUP64	WT	6	2.02501	minus4
DUP64	WT	6	0.563188	minus4
DUP64	WT	6	1.17147	minus4
DUP64	WT	6	1.93398	minus4
DUP64	WT	6	0.782057	minus4
DUP64	WT	6	0.920891	minus4
DUP64	WT	6	3.32076	minus4
DUP64	WT	6	1.68644	minus4
DUP64	WT	6	1.1357	minus4
DUP64	WT	6	2.42853	minus4
DUP64	WT	6	1.85018	minus4
DUP64	WT	6	0.629535	minus4
DUP64	WT	6	1.97064	minus4
DUP64	WT	6	7.03353	minus4
DUP64	WT	6	2.05192	minus4
DUP64	WT	6	1.51431	minus4
DUP64	WT	6	6.23795	minus4
DUP64	WT	6	1.11153	minus4
DUP64	WT	6	0.54599	minus4
DUP64	WT	6	2.15785	minus4
DUP64	WT	6	1.97064	minus4
DUP64	WT	6	5.50311	minus4
DUP64	WT	6	6.77521	minus4
DUP64	WT	6	1.14768	minus4
DUP64	WT	6	1.93398	minus4
DUP64	WT	6	1.19502	minus4
DUP64	WT	6	1.02478	minus4
DUP64	WT	6	0.396584	minus4
DUP64	WT	6	6.41109	minus4
DUP64	WT	6	1.76444	minus4
DUP64	WT	6	0.492667	minus4
DUP64	WT	6	6.83412	minus4
DUP64	WT	6	2.04297	minus4
DUP64	WT	6	0.767507	minus4
DUP64	WT	6	0.661418	minus4
DUP64	WT	6	0.629535	minus4
DUP64	WT	6	0.880404	minus4
DUP64	WT	6	0.838964	minus4
DUP64	WT	6	0.113867	minus4
DUP64	WT	6	2.66921	minus4
DUP64	WT	6	1.63676	minus4
DUP64	WT	6	0.692551	minus4
DUP64	WT	6	0.629535	minus4
DUP64	WT	6	23.0669	minus4
DUP64	WT	6	1.86896	minus4
DUP64	WT	6	6.78013	minus4
DUP64	WT	6	0.563188	minus4
DUP64	WT	6	4.31142	minus4
DUP64	WT	6	1.62673	minus4
DUP64	WT	6	2.44493	minus4
DUP64	WT	6	3.17148	minus4
DUP64	WT	6	7.32983	minus4
DUP64	WT	6	2.7238	minus4
DUP64	WT	6	0.310362	minus4
DUP64	WT	6	0.436282	minus4
DUP64	WT	6	1.13097	minus4
DUP64	WT	6	4.83258	minus4
DUP64	WT	6	1.13097	minus4
DUP64	WT	6	1.62673	minus4
DUP64	WT	6	2.83139	minus4
DUP64	WT	6	3.14987	minus4
DUP64	WT	6	0.209744	minus4
DUP64	WT	6	7.55051	minus4
DUP64	WT	6	1.61668	minus4
DUP64	WT	6	0.262486	minus4
DUP64	WT	6	6.61683	minus4
DUP64	WT	6	1.96151	minus4
DUP64	WT	6	7.23492	minus4
DUP64	WT	6	1.4512	minus4
DUP64	WT	6	1.21834	minus4
DUP64	WT	7	1.17147	minus2
DUP64	WT	7	0.97353	minus2
DUP64	WT	7	3.58949	minus2
DUP64	WT	7	1.27568	minus2
DUP64	WT	7	1.1357	minus2
DUP64	WT	7	1.84075	minus2
DUP64	WT	7	1.18327	minus2
DUP64	WT	7	1.0871	minus2
DUP64	WT	7	1.40836	minus2
DUP64	WT	7	0.99932	minus2
DUP64	WT	7	1.5247	minus2
DUP64	WT	7	1.32064	minus2
DUP64	WT	7	1.2067	minus2
DUP64	WT	7	1.65672	minus2
DUP64	WT	7	0.99932	minus2
DUP64	WT	7	1.26432	minus2
DUP64	WT	7	1.22991	minus2
DUP64	WT	7	1.09935	minus2
DUP64	WT	7	1.47239	minus2
DUP64	WT	7	1.82182	minus2
DUP64	WT	7	1.03739	minus2
DUP64	WT	7	1.73539	minus2
DUP64	WT	7	1.33177	minus2
DUP64	WT	7	1.09935	minus2
DUP64	WT	7	1.36486	minus2
DUP64	WT	7	1.27568	minus2
DUP64	WT	7	1.34284	minus2
DUP64	WT	7	1.27568	minus2
DUP64	WT	7	1.17147	minus2
DUP64	WT	7	1.02478	minus2
DUP64	WT	7	1.3758	minus2
DUP64	WT	7	1.46182	minus2
DUP64	WT	7	3.38372	minus2
DUP64	WT	7	2.83139	minus2
DUP64	WT	7	2.92949	minus2
DUP64	WT	7	1.75478	minus2
DUP64	WT	7	1.15961	minus2
DUP64	WT	7	2.95934	minus2
DUP64	WT	7	4.83258	minus2
DUP64	WT	7	2.05192	minus2
DUP64	WT	7	3.7367	minus2
DUP64	WT	7	6.34517	minus2
DUP64	WT	7	1.40836	minus2
DUP64	WT	7	1.75478	minus2
DUP64	WT	7	2.02501	minus2
DUP64	WT	7	1.36486	minus2
DUP64	WT	7	2.97421	minus2
DUP64	WT	7	1.77407	minus2
DUP64	WT	7	12.0853	minus2
DUP64	WT	7	5.87892	minus2
DUP64	WT	7	5.61716	minus2
DUP64	WT	7	3.43228	minus2
DUP64	WT	7	4.01642	minus2
DUP64	WT	7	6.67644	minus2
DUP64	WT	7	2.24418	minus2
DUP64	WT	7	2.83139	minus2
DUP64	WT	7	6.28912	minus2
DUP64	WT	7	4.3299	minus2
DUP64	WT	7	1.7451	minus2
DUP64	WT	7	6.12979	minus2
DUP64	WT	7	5.01153	minus2
DUP64	WT	7	2.82377	minus2
DUP64	WT	7	2.88442	minus2
DUP64	WT	7	3.95226	minus2
DUP64	WT	7	1.53506	minus2
DUP64	WT	7	1.85958	minus2
DUP64	WT	7	3.69684	minus2
DUP64	WT	7	2.40381	minus2
DUP64	WT	7	1.44055	minus2
DUP64	WT	7	8.05937	minus2
DUP64	WT	7	13.0783	minus2
DUP64	WT	7	5.84189	minus2
DUP64	WT	7	8.60075	minus2
DUP64	WT	7	1.24143	minus2
DUP64	WT	7	2.71603	minus2
DUP64	WT	7	5.78878	minus2
DUP64	WT	7	4.32374	minus2
DUP64	WT	7	2.07865	minus2
DUP64	WT	7	3.22163	minus2
DUP64	WT	7	2.14913	minus2
DUP64	WT	7	1.64675	minus2
DUP64	WT	7	3.11369	minus2
DUP64	WT	7	3.38372	minus2
DUP64	WT	7	5.10265	minus2
DUP64	WT	7	7.03353	minus2
DUP64	WT	7	2.43674	minus2
DUP64	WT	7	4.35449	minus2
DUP64	WT	7	1.1357	minus2
DUP64	WT	7	1.32064	minus2
DUP64	WT	7	3.17148	minus2
DUP64	WT	7	2.26125	minus2
DUP64	WT	7	4.62646	minus2
DUP64	WT	7	2.33726	minus2
DUP64	WT	7	1.0871	minus3
DUP64	WT	7	1.3758	minus3
DUP64	WT	7	1.29826	minus3
DUP64	WT	7	1.03739	minus3
DUP64	WT	7	1.06239	minus3
DUP64	WT	7	1.19502	minus3
DUP64	WT	7	0.97353	minus3
DUP64	WT	7	1.24143	minus3
DUP64	WT	7	1.15961	minus3
DUP64	WT	7	1.15961	minus3
DUP64	WT	7	1.17147	minus3
DUP64	WT	7	1.4512	minus3
DUP64	WT	7	0.960506	minus3
DUP64	WT	7	1.29826	minus3
DUP64	WT	7	1.50389	minus3
DUP64	WT	7	1.0871	minus3
DUP64	WT	7	1.41913	minus3
DUP64	WT	7	6.41109	minus3
DUP64	WT	7	1.24143	minus3
DUP64	WT	7	3.5079	minus3
DUP64	WT	7	4.36062	minus3
DUP64	WT	7	1.88765	minus3
DUP64	WT	7	6.09872	minus3
[truncated: 4,450 more rows]
