# Supplementary material for: Novel LOTUS-domain proteins are organizational hubs that recruit C. elegans Vasa to germ granules
Source: eLife. 2021 Jul 5;10:e60833. doi: 10.7554/eLife.60833 (PMC8331183; doi:10.7554/eLife.60833)
Supplement: Supplementary file 1. — (a) Table S1. Proteins enriched in GFP::MEG-3 pulldowns. Proteins are sorted according to their p-value from the t SAM statistic as previously described (Chen et al., 2016). (b) Table S2. Similarity measures between predicted MIP LOTUS domain structures and LOTUS domains from other metazoans. Protein domains: M1, MIP-1; M2, MIP-2; L1, LOTUS1; L2, LOTUS2. SeqID, sequence identity; GDT, Global Distance Test parameters for best templates; PDB ID, protein databank identifier of the best template; RMSD, backbone root mean square distances in Å, with number of aligned residues in parentheses. Published structures used for comparison: D. melanogaster Oskar (PBD ID 5nt7), H. sapiens TDRD5 (PBD ID 3s93). (c) Table S3. Pairwise MIP LOTUS structural similarity analysis. Values shown are backbone rmsd values in Å and number of aligned residues (in parentheses). M1, MIP-1, M2, MIP-2; L1, LOTUS1; L2, LOTUS2. (d) Table S4. Description of MIP depletion phenotypes. (e) Table S5. Pairwise predicted binding affinities between MIP LOTUS domains and between MIP LOTUS domains and GLH-1. Affinities are in kcal/mol. M1, MIP-1; M2, MIP-2; L1, LOTUS1; L2, LOTUS2. Predictions for GLH-1 binding considered only the helicase CTD domain. Predictions for combinations with no values given were highly unfavorable (>0 kcal/mol). Predicted binding affinities for the native Drosophila complexes: Oskar LOTUS homodimer = −54.5 kcal/mol; Oskar LOTUS—Vasa helicase complex = −53.5 kcal/mol. (f) Table S6. Strains produced and used in this study. (g) Table S7. Guide RNA sequences, repair templates, and screening primers for CRISPR strains produced in this study. (h) Table S8. Plasmid DNA constructs for in vitro pulldown experiments. [file elife-60833-supp1.xlsx]

## Sheet: Table Legends
Table S1. Proteins enriched in GFP::MEG-3 pulldowns. Proteins are sorted according to their p-value from the t SAM statistic as previously described (Chen et al., 2016).
Table S2. Similarity measures between predicted MIP LOTUS domain structures and LOTUS domains from other metazoans. Protein domains: M1, MIP-1; M2, MIP-2; L1, LOTUS1; L2, LOTUS2. SeqID, sequence identity; GDT, Global Distance Test parameters for best templates; PDB ID, protein databank identifier of the best template; RMSD, backbone root mean square distances in Å, with number of aligned residues…
Table S3. Pairwise MIP LOTUS structural similarity analysis. Values shown are backbone rmsd values in Å and number of aligned residues (in parentheses). M1, MIP-1, M2, MIP-2; L1, LOTUS1; L2, LOTUS2.
Table S4. Description of MIP depletion phenotypes.
Table S5. Pairwise predicted binding affinities between MIP LOTUS domains and between MIP LOTUS domains and GLH-1. Affinities are in kcal/mol. M1, MIP-1; M2, MIP-2; L1, LOTUS1; L2, LOTUS2. Predictions for GLH-1 binding considered only the helicase CTD domain. Predictions for combinations with no values given were highly unfavorable (>0 kcal/mol). Predicted binding affinities for the native Drosop…
Table S6. Strains produced and used in this study.
Table S7. Guide RNA sequences, repair templates, and screening primers for CRISPR strains produced in this study.
Table S8. Plasmid DNA constructs for in vitro pulldown experiments.

## Sheet: 1a - Table S1
Column header	Description
LFQ	protein LFQ intensity
Experiment	number of peptide evidences used for protein LFQ quantification
Protein_symbol	Gene symbol
WB_ID	WormBase ID
Protein_ID	WormPep ID
log2FC	Log2 fold enrichment of the protein compared to the blocked bead controls
P_value	Minus log10-transformed p value of the t test (significance of the enrichment)
t_statistic	Student's t statistic
t_sam	t SAM statistic of the enrichment
Sign	(+) indicates that the protein is considered a specific interactor
known_P_granule	(+) indicates that the protein is a known P granule component
Protein_symbol	WB_ID	Protein_ID	log2FC	P_value	t_statistic	t_sam	Sign	known_P_granule	LFQ.intensity.GEI12_CON_S1..CON.	LFQ.intensity.GEI12_CON_S2..CON.	LFQ.intensity.GEI12_CON_S3..CON.	LFQ.intensity.GEI12_GFP_S1..GFP.	LFQ.intensity.GEI12_GFP_S2..GFP.	LFQ.intensity.GEI12_GFP_S3..GFP.	Experiment.GEI12_CON_S1	Experiment.GEI12_CON_S2	Experiment.GEI12_CON_S3	Experiment.GEI12_GFP_S1	Experiment.GEI12_GFP_S2	Experiment.GEI12_GFP_S3
F58G11.3a	WBGene00010281	F58G11.3a	9.0479	5.17268	30.6861	5.04102	+		19.0032	18.1418	18.1034	27.515	27.4422	27.4349	NA	1	1	39	40	40
C38D4.4	WBGene00008005	C38D4.4	9.43723	4.52025	21.0364	4.84305	+		18.6554	19.0897	19.8022	29.0821	28.0596	28.7173	2	4	4	48	53	50
ZK1240.5	WBGene00022870	ZK1240.5	8.6078	5.01636	28.0355	4.7635	+		17.2138	17.5106	16.5837	25.9807	25.6387	25.5121	NA	NA	NA	3	3	2
GFP	GFP	Q9U6Y5	7.4012	6.02545	50.1894	4.49248	+		22.2101	21.895	22.0498	29.3867	29.2932	29.6786	3	2	3	35	32	28
C36C9.1	WBGene00016485	C36C9.1	10.2409	3.52978	11.7992	4.32484	+	+	17.1025	14.3524	16.7732	26.3884	26.3094	26.2531	1	1	NA	27	30	29
gei-12	WBGene00001569	F52D2.4	7.76353	3.69187	12.9795	3.7002	+	+	22.8128	23.6349	24.869	31.5619	31.5635	31.4819	10	22	23	148	152	143
scd-1	WBGene00004739	H20J18.1b	6.1803	4.68528	23.1478	3.49764	+		17.628	18.0021	18.1618	24.5213	23.794	24.0175	NA	NA	NA	6	8	9
prg-1	WBGene00004178	D2030.6	5.28467	5.479	36.6226	3.21393	+	+	19.6813	19.9118	19.5071	24.8256	25.0167	25.1119	2	3	1	17	16	16
gld-3	WBGene00001597	T07F8.3b	5.52617	3.89392	14.6103	2.94221	+	+	18.3064	18.9165	18.617	23.4701	24.4647	24.4836	1	2	2	7	8	7
F46H5.7a	WBGene00018522	F46H5.7a	5.34433	4.08605	16.3441	2.92521	+		19.7258	20.0324	20.6541	25.3148	25.8412	25.2893	1	3	3	16	16	13
ZK1053.4	WBGene00014199	ZK1053.4	7.59777	2.37092	5.85091	2.71488	+		20.4722	23.1627	24.9395	30.46	30.4523	30.4554	2	9	11	82	83	81
C06A6.5	WBGene00015510	C06A6.5	5.21063	3.06495	8.95267	2.50268	+		21.6988	21.215	19.9505	26.3874	25.649	26.4598	5	6	3	22	25	24
C35E7.5a	WBGene00016457	C35E7.5a	4.54153	3.5967	12.2735	2.42859	+		21.3794	22.45	22.5143	26.7098	26.6763	26.5822	7	6	7	32	38	38
cgh-1	WBGene00000479	C07H6.5	4.2611	4.12073	16.6777	2.42729	+	+	24.6882	24.6563	25.1676	28.7988	29.0328	29.4638	7	13	12	50	67	63
Y17G7B.18a	WBGene00012469	Y17G7B.18a	4.84267	3.12641	9.28817	2.39572	+		19.0627	18.3474	20.122	24.1266	23.8676	24.0659	NA	NA	NA	6	7	7
F44F1.6a	WBGene00009698	F44F1.6a	4.325	3.45007	11.2572	2.2954	+		18.0881	18.0439	18.0147	23.0745	22.2944	21.7528	NA	NA	NA	4	4	1
K11H3.3	WBGene00010780	K11H3.3	3.85773	4.37491	19.3348	2.26989	+		19.8576	19.5094	20.0211	23.5991	23.46	23.9022	1	2	1	6	8	7
lsm-1	WBGene00003076	F40F8.9	4.09987	3.67784	12.873	2.25455	+		19.4963	18.7825	19.2786	23.6271	22.8268	23.4031	1	1	1	5	7	5
Y59E9AL.36	WBGene00195093	Y59E9AL.36	5.80267	2.14177	5.05319	2.19108	+		18.6636	20.7703	17.3439	25.8654	24.1618	24.1586	NA	1	NA	11	10	10
R10E4.1	WBGene00011198	R10E4.1	4.67337	2.53797	6.49546	2.10561	+		18.9033	20.459	18.0016	23.7183	23.7759	23.8898	NA	3	NA	6	8	7
Y50D4C.3	WBGene00021748	Y50D4C.3	3.8941	3.37375	10.7603	2.09147	+		17.5668	18.5128	17.5724	21.4309	21.8746	22.0288	NA	NA	NA	4	5	7
C37C3.9	WBGene00016501	C37C3.9	3.62997	3.89242	14.5974	2.07584	+		19.0982	19.0054	18.3772	22.5644	22.5548	22.2515	NA	NA	NA	6	4	4
mbk-2	WBGene00003150	F49E11.1m	4.48753	2.35195	5.78125	1.97148	+	+	19.6341	17.0152	17.8542	22.5151	22.6594	22.7916	NA	NA	NA	6	6	6
ifet-1	WBGene00004132	F56F3.1	3.3003	4.30494	18.5646	1.96707	+	+	27.0455	26.6773	26.919	30.4633	30.0396	30.0398	28	32	29	91	87	81
swan-1	WBGene00009977	F53C11.8	3.2663	4.38719	19.4731	1.95853	+		26.0315	25.7455	26.1275	29.3866	28.9924	29.3244	15	19	24	36	38	37
npp-13	WBGene00003799	Y37E3.15c	3.95937	2.51817	6.41605	1.87018	+		16.7226	17.88	18.8157	21.563	21.9778	21.7556	NA	NA	NA	3	4	4
top-1	WBGene00006595	M01E5.5b	2.99907	4.67609	23.025	1.83963	+		22.831	22.4013	22.5545	25.5828	25.6586	25.5426	6	5	7	15	18	18
patr-1	WBGene00009661	F43G6.9	3.6488	2.67163	7.05394	1.80878	+	+	20.7305	20.8365	21.9242	24.1189	25.2323	25.0864	1	2	3	10	17	17
R08C7.8	WBGene00019951	R08C7.8	4.2516	2.03034	4.69757	1.76777	+		19.0558	19.5386	16.6218	22.5358	22.7646	22.6706	NA	NA	NA	1	1	1
mrpl-14	WBGene00018475	F45E12.5b	2.9302	4.1208	16.6783	1.74865	+		18.4246	18.3453	18.4653	21.6847	21.143	21.1981	NA	NA	NA	1	1	1
ife-3	WBGene00002061	B0348.6a	2.98717	3.65159	12.6761	1.72106	+		25.1919	25.9055	25.8638	28.7139	28.6513	28.5575	10	16	12	25	26	23
misc-1	WBGene00015186	B0432.4	3.08837	3.25314	10.0171	1.70788	+		18.3235	17.8255	18.866	21.2946	21.5281	21.4574	NA	NA	NA	2	2	3
R74.2	WBGene00011278	R74.2	3.2286	2.86734	7.94783	1.69371	+		16.081	17.3303	16.7235	20.2952	19.6615	19.8639	NA	NA	NA	1	1	1
mex-3	WBGene00003229	F53G12.5a	2.9631	3.52662	11.7773	1.69166	+	+	24.7215	24.0274	24.6427	27.6575	27.2368	27.3866	6	11	10	26	27	28
xrn-2	WBGene00006964	Y48B6A.3	2.76217	3.58885	12.2169	1.60024	+		22.1529	21.7624	22.1006	24.4331	25.0914	24.7779	4	5	3	14	15	15
C49F8.3	WBGene00008215	C49F8.3	3.01717	2.81126	7.6819	1.59405	+		20.1978	20.9289	20.38	22.8732	23.9116	23.7734	2	3	2	7	6	5
gck-3	WBGene00013355	Y59A8B.23b	3.38157	2.22661	5.33767	1.58496	+		19.6198	21.4365	19.6065	23.9565	23.3826	23.4684	1	4	1	8	6	7
Y39G10AR.11	WBGene00021469	Y39G10AR.11	2.69033	3.72982	13.2718	1.58003	+		24.5039	23.9853	23.9917	26.8896	27.0144	26.6479	13	17	15	42	37	36
F25H2.6	WBGene00009120	F25H2.6	2.95547	2.86848	7.9533	1.57911	+		18.0169	17.1207	18.3382	20.9187	20.755	20.6685	NA	NA	NA	2	2	3
Y48C3A.14a	WBGene00012995	Y48C3A.14a	3.0016	2.70603	7.20426	1.56607	+		21.3408	21.0403	22.3244	24.3015	24.5797	24.8291	4	4	5	13	14	16
nfi-1	WBGene00003592	ZK1290.4b	4.10937	1.65548	3.63273	1.56178	+		21.2714	20.9257	24.4775	26.3858	26.2731	26.3438	3	4	4	17	18	20
cpsf-1	WBGene00022301	Y76B12C.7a	3.52027	2.01788	4.65902	1.56069	+		17.9851	19.8329	18.9522	21.6131	22.2749	23.443	NA	1	NA	6	7	8
M01E5.3b	WBGene00010806	M01E5.3b	3.40583	2.0808	4.85617	1.54716	+		19.9915	17.8175	19.8276	22.506	22.6989	22.6492	1	NA	1	4	4	5
car-1	WBGene00012484	Y18D10A.17	2.6243	3.73131	13.2834	1.54592	+	+	29.1939	28.6712	29.1974	31.828	31.5356	31.5718	38	36	41	54	64	64
F10F2.2	WBGene00008654	F10F2.2	2.58743	3.54187	11.8836	1.50631	+		17.901	17.5333	17.68	19.9485	20.6032	20.3249	NA	NA	NA	1	1	1
spn-4	WBGene00004984	ZC404.8	2.4383	4.46368	20.3573	1.50533	+	+	25.8612	25.6354	25.9388	28.3727	28.1056	28.272	13	21	16	35	37	35
nol-9	WBGene00010709	K09B11.2a	2.53887	3.60472	12.3315	1.4883	+		18.4622	18.6306	18.3465	20.6762	21.327	21.0527	NA	2	1	3	3	2
miz-1	WBGene00011259	R13.4b	2.7721	2.77396	7.50949	1.48308	+		16.8361	18.0459	17.7132	20.1484	20.3723	20.3908	NA	NA	NA	2	2	2
W03C9.2	WBGene00012220	W03C9.2	2.9509	2.38664	5.90919	1.47591	+		16.8968	18.5931	17.7671	20.5103	20.7735	20.8259	NA	NA	NA	1	1	1
mam-2	WBGene00008150	C47E12.6	2.9501	2.32767	5.69306	1.46175	+		17.8904	17.7671	19.3255	21.007	21.4078	21.4185	NA	NA	NA	1	2	1
drh-3	WBGene00008400	D2005.5	2.72847	2.75047	7.40264	1.46018	+	+	20.7571	21.695	20.7139	23.4869	24.1169	23.7476	2	4	1	10	14	11
gld-2	WBGene00001596	ZC308.1a	2.30817	4.74652	23.9835	1.446	+	+	21.9745	21.7446	22.0378	24.1725	24.2962	24.2127	3	2	4	11	10	9
T04D3.1	WBGene00011431	T04D3.1	3.74913	1.52084	3.29262	1.42085	+		16.9218	20.1051	20.0145	21.8799	23.3471	23.0618	NA	1	1	3	5	4
F16B12.6	WBGene00008882	F16B12.6	2.86403	2.26911	5.48488	1.41632	+		19.5505	21.1305	19.7181	22.7176	23.0582	23.2154	NA	4	1	5	7	7
K02A11.3	WBGene00010488	K02A11.3	2.3737	3.49284	11.545	1.39171	+		18.279	17.634	17.9972	20.2275	20.2918	20.512	NA	NA	NA	2	2	2
adr-2	WBGene00000080	T20H4.4	2.36783	3.45575	11.295	1.38499	+		16.9784	17.5497	17.6499	19.7655	19.7335	19.7825	NA	NA	NA	1	1	1
T11B7.1	WBGene00011706	T11B7.1	2.3765	3.28689	10.2201	1.37169	+		18.7701	19.1728	18.6331	20.9018	21.3891	21.4146	NA	NA	NA	2	4	3
T05F1.4	WBGene00011490	T05F1.4	3.0113	1.89595	4.29388	1.36796	+		17.8392	18.7743	16.3762	20.5656	20.654	20.804	NA	NA	NA	2	1	1
lin-35	WBGene00003020	C32F10.2	3.19317	1.71001	3.7763	1.36135	+		16.6213	19.2138	18.8989	21.7387	21.5628	21.012	NA	NA	NA	2	3	2
cul-3	WBGene00000838	Y108G3AL.1	2.39393	3.11275	9.21261	1.3603	+		21.4423	21.42	21.6256	23.3892	24.1829	24.0976	3	5	3	9	13	11
C44B7.2a	WBGene00016624	C44B7.2a	2.75863	2.18213	5.18701	1.35771	+		18.9233	20.5189	20.3551	22.593	23.0063	22.4739	NA	3	1	3	4	4
dyn-1	WBGene00001130	C02C6.1a	5.82657	0.93093	1.99158	1.31656	+		16.7564	25.8917	17.5523	26.1792	25.6474	25.8535	NA	2	NA	4	4	4
gpd-1	WBGene00001683	T09F3.3	2.77173	1.9156	4.35125	1.29702			17.9446	19.9445	19.7126	21.867	21.9134	22.1365	NA	1	1	1	1	1
laf-1	WBGene00002244	Y71H2AM.19a	2.09107	4.26879	18.1784	1.29475		+	25.556	25.863	25.8833	27.7689	27.9099	27.8967	15	24	20	38	41	43
C05C10.2a	WBGene00007329	C05C10.2a	2.9198	1.74161	3.86113	1.29412			19.2987	21.2072	21.7798	23.7147	23.5008	23.8296	NA	4	3	13	11	12
dcn-1	WBGene00010428	H38K22.2b	3.2019	1.47477	3.18064	1.27735			17.1355	20.4523	18.8351	21.4324	22.497	22.0992	NA	1	NA	3	4	4
Y66D12A.19	WBGene00013445	Y66D12A.19	2.26257	2.9413	8.31119	1.27668			21.932	22.4803	22.1904	24.0357	24.7766	24.5781	2	6	6	8	7	8
gut-2	WBGene00001808	T10G3.6a	3.40077	1.36343	2.91851	1.27597			17.561	21.4992	19.0981	22.4371	23.1668	22.7567	NA	3	NA	4	4	4
ldh-1	WBGene00002262	F13D12.2	3.0166	1.59203	3.46997	1.27318			18.2943	21.1809	19.1517	22.4767	22.8543	22.3457	NA	3	NA	4	4	5
F08F8.9b	WBGene00017274	F08F8.9b	2.702	1.89853	4.30138	1.26963			18.0037	19.1703	17.0348	20.8562	20.542	20.9166	NA	NA	NA	3	2	1
F48F7.6	WBGene00009851	F48F7.6	2.79767	1.75763	3.90462	1.2622			21.1706	21.3694	21.5414	23.298	25.5633	23.6131	1	1	1	5	4	5
rpc-1	WBGene00004411	C42D4.8	2.43087	2.27597	5.50893	1.25221			22.5871	22.8157	23.0137	25.3585	25.9015	24.4491	1	1	1	1	2	2
dna-2	WBGene00001016	F43G6.1b	2.66187	1.87737	4.24008	1.251			18.6947	20.3707	18.9091	21.3366	22.1287	22.4948	NA	2	NA	3	6	4
Y57A10A.13	WBGene00013256	Y57A10A.13	2.7627	1.69172	3.72776	1.23273			17.0095	19.5482	18.0294	20.9527	20.8358	21.0867	NA	1	NA	2	2	2
T12G3.4	WBGene00011739	T12G3.4	2.48623	2.04886	4.7553	1.22908			18.3596	19.9313	18.3832	21.2713	21.4119	21.4496	NA	1	NA	3	2	2
E02D9.1b	WBGene00017098	E02D9.1b	2.23153	2.67417	7.06492	1.22891			21.8768	22.5235	22.6503	24.1789	24.709	24.8573	2	6	4	9	11	11
T08B2.7b	WBGene00020347	T08B2.7b	1.99517	4.0214	15.7394	1.22646			26.5138	26.5049	26.527	28.2619	28.5926	28.6767	30	39	36	57	66	64
mex-1	WBGene00003228	W03C9.7a	2.234	2.60786	6.78248	1.22118		+	25.1551	24.0486	24.4941	26.9421	26.71	26.7477	11	10	14	32	35	30
F54D10.7	WBGene00018808	F54D10.7	2.16853	2.83667	7.80139	1.21967			22.3862	22.2466	23.1213	24.6608	24.867	24.7319	4	3	3	10	10	8
skr-14	WBGene00004820	Y47D7A.8	3.46443	1.21337	2.58224	1.21917			17.392	16.9146	18.2219	18.4025	22.2033	22.316	NA	NA	NA	NA	1	1
lsm-3	WBGene00003077	Y62E10A.12a	2.06043	3.3318	10.4962	1.21466			20.4028	20.258	20.8511	22.4794	22.7276	22.4862	1	2	3	3	3	3
cogc-4	WBGene00021784	Y51H7C.6a	2.1308	2.91441	8.17736	1.21029			18.3012	18.2524	18.1235	19.8636	20.7172	20.4887	NA	2	NA	1	1	3
kin-20	WBGene00002203	F46F2.2e	2.68983	1.68712	3.7156	1.2095			20.4319	18.8042	18.1475	21.3184	22.1127	22.022	1	NA	NA	2	2	1
btb-6	WBGene00018438	F45C12.7	2.72083	1.62616	3.55695	1.20129			17.5743	20.1546	18.6074	21.3183	21.38	21.8005	NA	2	NA	4	4	3
hsp-6	WBGene00002010	C37H5.8	1.9559	3.83682	14.1303	1.19377			27.5829	28.0379	27.6812	29.7251	29.7098	29.7348	40	54	49	66	68	66
F44B9.8	WBGene00018409	F44B9.8	2.0105	3.30038	10.3023	1.18603			21.8932	22.4018	21.9556	23.9107	24.2957	24.0757	1	4	5	6	5	7
K12D12.5	WBGene00010787	K12D12.5	2.21927	2.39219	5.92987	1.18408			22.5177	22.1515	22.4981	24.3554	25.3091	24.1606	1	2	1	12	12	12
dnj-20	WBGene00001038	T15H9.7a	2.01097	3.22586	9.85585	1.18012			20.9397	21.4127	21.471	23.5089	23.2241	23.1233	1	2	1	3	3	4
paxt-1	WBGene00011034	R05D11.6	2.6002	1.66683	3.66231	1.17657			20.8733	22.4317	22.7336	23.9928	25.3996	24.4468	1	4	3	7	7	8
xrn-1	WBGene00012730	Y39G8C.1	1.85863	4.54685	21.3634	1.17116			22.576	22.6161	22.6034	24.2975	24.5933	24.4806	4	8	5	18	16	16
mcm-2	WBGene00003154	Y17G7B.5a	2.4949	1.757	3.90291	1.16625			20.3348	22.3799	22.0698	23.9711	24.126	24.1721	2	10	2	14	15	13
C44B7.10	WBGene00016630	C44B7.10	1.9636	3.30814	10.3498	1.16208			26.0841	26.3739	26.3025	28.5484	27.9979	28.105	13	28	22	41	35	36
C23G10.8	WBGene00016015	C23G10.8	2.05	2.79436	7.60334	1.15844			21.0826	21.0431	21.5532	22.8484	23.4754	23.5051	2	2	3	4	7	8
kin-19	WBGene00002202	C03C10.1	1.85293	4.28184	18.3169	1.15724			21.5651	21.4991	21.8037	23.4738	23.5473	23.4056	2	2	2	3	4	4
pyc-1	WBGene00004258	D2023.2a	1.88953	3.80521	13.8712	1.15482			24.4938	24.8247	24.5912	26.3373	26.6165	26.6245	9	14	14	30	32	34
C01G10.9	WBGene00007236	C01G10.9	1.93307	3.29993	10.2995	1.1454			20.5645	20.9877	21.0552	22.9358	22.5886	22.8822	2	2	1	6	6	7
mtss-1	WBGene00019800	PAR2.1	1.83707	4.09899	16.4678	1.13993			25.6325	25.7333	25.9339	27.7338	27.5056	27.5715	7	15	11	19	17	16
F52B5.3	WBGene00009922	F52B5.3	2.521	1.62056	3.5426	1.13989			20.6623	19.1133	21.2007	22.3417	23.4909	22.7067	1	2	1	6	8	7
H10E21.4	WBGene00019184	H10E21.4	2.16323	2.24587	5.404	1.13836			17.5081	18.6626	18.0864	20.6028	19.8405	20.3035	NA	NA	NA	1	2	1
C01B10.11	WBGene00044294	C01B10.11	2.62537	1.4888	3.21454	1.13323			17.8909	16.9516	19.7268	20.8815	20.8551	20.7088	NA	NA	NA	2	3	3
rde-12	WBGene00010280	F58G11.2c	2.05243	2.55741	6.57419	1.13257			22.7133	22.3657	23.3621	24.8713	24.6722	25.0549	4	4	6	15	15	15
pkc-3	WBGene00004034	F09E5.1	1.84887	3.7262	13.2436	1.12763			20.8235	20.6794	21.0746	22.7586	22.8114	22.5541	2	2	2	4	4	5
ZK688.5b	WBGene00022800	ZK688.5b	2.2563	1.93343	4.40381	1.12123			19.4396	18.108	18.2009	20.4384	20.7013	21.3777	NA	NA	NA	1	4	2
mspn-1	WBGene00010557	K04D7.2b	1.95447	2.8727	7.97365	1.11996			18.8496	18.1523	18.7457	20.3356	20.5466	20.7288	NA	NA	NA	2	2	2
grld-1	WBGene00017929	F29C4.7c	2.79597	1.30804	2.79223	1.11779			20.7059	18.1131	17.5186	21.3436	21.3822	21.9997	1	1	1	2	3	3
pos-1	WBGene00004078	F52E1.1	1.8472	3.42813	11.1121	1.10861		+	24.9361	24.4705	24.9957	26.6345	26.6464	26.663	12	9	12	20	20	21
tbg-1	WBGene00006540	F58A4.8	2.01087	2.49611	6.32857	1.10624			23.0356	23.4576	23.0147	24.6145	25.4417	25.4843	4	4	4	13	17	14
F56D3.1	WBGene00018969	F56D3.1	1.8452	3.311	10.3674	1.09965			22.5457	22.2274	22.2859	24.4873	23.9933	24.114	2	1	2	3	3	5
D1081.7b	WBGene00008385	D1081.7b	1.79787	3.64735	12.6445	1.0948			24.1286	24.0344	24.3685	25.8952	26.1768	25.8531	6	13	12	25	26	22
F57B10.5	WBGene00019003	F57B10.5	1.87733	2.95912	8.40097	1.08928			20.0473	20.0505	19.9321	22.1993	21.4625	22.0001	1	1	1	1	1	1
gip-2	WBGene00044008	C45G3.5	2.19507	1.87851	4.24339	1.08813			18.0526	19.357	17.99	20.3872	21.1869	20.4107	NA	NA	NA	1	2	1
W09C5.7a	WBGene00012353	W09C5.7a	2.29207	1.71101	3.77895	1.08807			16.7879	18.6765	18.3326	19.8872	20.3123	20.4737	NA	NA	NA	1	3	1
msh-6	WBGene00003422	Y47G6A.11	2.38293	1.57103	3.41711	1.08446			18.4337	20.4674	20.5118	21.931	22.3315	22.2992	NA	1	1	4	2	2
nhr-49	WBGene00003639	K10C3.6e	2.32817	1.63937	3.59098	1.08371			20.4845	22.4053	21.7422	23.2486	24.3165	24.0514	3	9	5	12	10	10
lsm-4	WBGene00003078	F32A5.7	1.82643	3.21304	9.78089	1.08282			22.746	23.1886	22.899	24.5225	24.807	24.9834	2	3	4	7	8	7
T25G3.3	WBGene00012030	T25G3.3	2.6939	1.27344	2.71466	1.08087			17.4841	20.8197	18.6846	21.8728	21.8723	21.325	NA	1	NA	4	5	4
unc-119	WBGene00006843	M142.1b	1.8427	3.01519	8.68931	1.0763			20.547	20.0592	20.4311	21.8873	22.3831	22.295	2	2	2	4	3	3
pqn-27	WBGene00004116	E01G4.4a	1.79743	3.33426	10.5115	1.07566			23.2354	23.663	23.5439	25.4469	25.0609	25.3268	8	12	8	19	17	16
trap-4	WBGene00013238	Y56A3A.21	1.8166	3.14772	9.4072	1.07294			25.4693	25.9778	25.844	27.4901	27.4349	27.8159	9	10	11	13	14	12
F46C5.9	WBGene00009784	F46C5.9	2.34623	1.56919	3.41249	1.07254			17.4413	16.7193	18.961	19.691	20.3361	20.1332	NA	NA	NA	1	2	1
dhod-1	WBGene00020932	W02D3.2	2.52553	1.34978	2.88714	1.06349			19.105	20.489	17.6083	21.0714	21.9798	21.7277	NA	1	NA	2	3	2
ekl-1	WBGene00009052	F22D6.6	2.64127	1.24641	2.65474	1.05866			17.1467	20.3699	17.7965	20.81	21.1147	21.3122	NA	1	NA	4	3	3
par-3	WBGene00003918	F54E7.3a	2.44233	1.40109	3.00589	1.05614			19.2006	21.7836	21.3521	23.0912	23.5171	23.055	1	4	3	6	7	9
lsm-6	WBGene00003080	Y71G12B.14	1.78253	3.10544	9.17242	1.05205			21.7238	22.2413	22.1337	23.9976	23.6067	23.8421	2	4	2	7	7	9
F43D9.3b	WBGene00009654	F43D9.3b	2.1128	1.84343	4.14306	1.05116			20.1426	21.417	19.8031	22.3096	22.7762	22.6153	1	2	1	4	5	5
C06G3.6	WBGene00015552	C06G3.6	2.2674	1.56105	3.39214	1.04564			20.1145	18.1434	20.1472	21.6267	21.9109	21.6697	1	NA	1	2	2	2
mrpl-20	WBGene00012992	Y48C3A.10	2.69423	1.16974	2.48774	1.04306			19.1631	22.4554	19.2805	23.191	22.9224	22.8683	NA	2	NA	3	5	3
B0303.3	WBGene00015125	B0303.3	1.67837	3.95152	15.1103	1.04177			26.7734	27.0276	26.7902	28.3925	28.6127	28.6211	22	29	27	44	46	41
F19B10.10	WBGene00017589	F19B10.10	2.19487	1.64588	3.6078	1.04103			17.3783	19.363	17.8893	20.3536	20.6461	20.2155	NA	NA	NA	1	3	1
R02D3.4a	WBGene00019822	R02D3.4a	2.12117	1.74713	3.87609	1.03611			18.2899	19.2713	20.0752	21.0152	21.6443	21.3404	NA	1	2	2	4	3
K09E4.3a	WBGene00010721	K09E4.3a	1.92957	2.18235	5.18773	1.03078			18.3981	17.2044	17.3865	19.6063	19.6221	19.5493	NA	NA	NA	1	1	2
T09B4.9	WBGene00020383	T09B4.9	1.8527	2.443	6.12208	1.02778			21.2273	22.0919	22.0454	23.6073	23.8511	23.4643	2	3	3	6	6	7
ant-1.1	WBGene00006439	T27E9.1a	1.68477	3.56185	12.0243	1.02723			28.585	28.4088	28.7186	30.0444	30.3973	30.325	36	36	36	47	52	48
scc-3	WBGene00004738	F18E2.3	2.34367	1.38157	2.96044	1.02269			17.8957	20.4478	18.3425	21.4029	21.1069	21.2072	NA	2	NA	5	3	3
Y44E3A.6a	WBGene00021551	Y44E3A.6a	1.9133	2.16604	5.13333	1.02167			23.969	24.8392	24.5038	25.8053	26.5902	26.6564	7	11	11	24	31	30
rsd-6	WBGene00004684	F16D3.2	1.66407	3.66376	12.767	1.02069			22.6997	22.9502	22.6645	24.3521	24.6238	24.3307	1	5	7	5	9	9
timm-23	WBGene00008857	F15D3.7	2.0787	1.72369	3.81289	1.01639			21.0834	21.5689	22.8402	23.645	24.1688	23.9148	1	3	2	4	7	6
asp-4	WBGene00000217	R12H7.2	1.599	4.41253	19.7618	1.01144			24.1311	24.098	23.8971	25.5749	25.6921	25.6562	6	6	5	11	12	11
Y39A3CR.3b	WBGene00021444	Y39A3CR.3b	1.8764	2.20396	5.26051	1.01061			17.5718	18.6193	17.6842	19.8942	19.5853	20.025	NA	NA	NA	1	2	2
skpo-1	WBGene00009897	F49E12.1	2.84217	1.00513	2.14235	1.00549			20.9093	16.4966	17.6342	21.3535	21.2115	21.0016	1	NA	NA	1	2	1
Y23H5A.3	WBGene00021270	Y23H5A.3	1.78033	2.52542	6.44502	1.00231			22.0826	22.9401	22.716	24.5112	24.4024	24.1661	1	3	2	9	8	7
F52A8.6c	WBGene00009919	F52A8.6c	1.97937	1.84207	4.13922	1.00059			19.808	18.6777	20.1799	21.2305	21.7544	21.6188	1	NA	2	2	2	2
tars-1	WBGene00006617	C47D12.6b	1.68493	3.09053	9.09097	0.999758			23.2242	23.4715	23.0968	24.7652	25.2445	24.8376	7	11	8	16	18	13
hpk-1	WBGene00001994	F20B6.8c	1.8552	2.12732	5.00596	0.991768			17.9092	18.9324	17.9714	19.8933	20.037	20.4483	NA	1	NA	1	1	1
let-92	WBGene00002363	F38H4.9	1.5576	4.43416	20.0115	0.987175			24.8683	24.8627	24.9513	26.3655	26.3941	26.5955	8	7	8	17	16	16
plp-1	WBGene00004046	F45E4.2	1.58257	3.95325	15.1256	0.986251			28.3255	28.5421	28.6758	30.1289	30.1099	30.0523	38	41	40	41	42	45
eif-3.K	WBGene00001233	T16G1.11	2.2893	1.30408	2.78332	0.985702			17.0765	19.8546	18.6366	20.4807	20.8875	21.0674	NA	2	NA	2	3	2
gpd-4	WBGene00001686	F33H1.2	1.78563	2.2985	5.58858	0.981379			25.8786	26.7981	26.1643	27.7715	28.0726	28.3538	9	13	10	23	27	30
par-6	WBGene00003921	T26E3.3a	1.68607	2.70408	7.19565	0.972179			22.7397	22.4426	22.6362	24.7111	23.9809	24.1847	2	3	2	4	5	4
rho-1	WBGene00004357	Y51H4A.3a	1.6726	2.75589	7.42718	0.969511			21.809	22.5554	22.2623	23.7619	23.9414	23.9412	3	3	3	5	5	5
fbxa-215	WBGene00012879	Y45F10C.3	1.8006	2.09786	4.91068	0.964605			19.682	19.0393	19.514	20.6058	21.388	21.6433	1	1	1	1	1	1
vbh-1	WBGene00006888	Y54E10A.9b	1.6048	3.12081	9.25713	0.959029		+	25.0488	25.0333	25.1571	26.3556	26.9158	26.7822	11	10	11	25	20	20
hda-2	WBGene00001835	C08B11.2	1.9407	1.67566	3.68544	0.957621			18.0052	19.4127	18.2958	20.0171	21.0693	20.4494	NA	1	NA	1	2	2
nol-5	WBGene00020915	W01B11.3	1.76007	2.18142	5.18461	0.956829			21.0821	22.0088	21.9605	23.1424	23.5207	23.6685	2	3	2	7	9	7
Y54E2A.4a	WBGene00013189	Y54E2A.4a	1.759	2.13695	5.03739	0.951228			19.5853	19.6759	18.6087	20.9963	20.9588	21.1918	NA	NA	NA	3	3	5
C05C8.1b	WBGene00015460	C05C8.1b	2.3555	1.13327	2.40975	0.950761			17.3788	20.6022	19.8216	21.7895	21.4062	21.6734	NA	2	2	1	2	4
let-767	WBGene00002891	C56G2.6a	1.95547	1.60764	3.50959	0.950558			17.6722	19.1115	17.3363	20.183	20.0269	19.7765	NA	1	NA	1	1	1
ZK669.4	WBGene00014054	ZK669.4	1.58613	3.08764	9.07523	0.947072			25.2624	25.8526	25.6603	27.2114	27.1473	27.175	17	20	16	35	35	35
spk-1	WBGene00004980	B0464.5b	1.60067	2.90382	8.12524	0.943234			21.6717	22.0827	21.9825	23.2156	23.7263	23.597	3	3	3	6	4	5
lin-15B	WBGene00023497	ZK662.4	1.99373	1.49009	3.21764	0.940606			17.9843	20.0695	19.2895	21.0136	21.3428	20.9681	NA	1	1	3	3	3
gsp-2	WBGene00001748	F56C9.1	1.96813	1.52931	3.31344	0.939899			20.1377	21.3261	22.0338	22.7296	23.4694	23.203	2	3	2	2	2	2
ego-1	WBGene00001214	F26A3.3	1.85537	1.75163	3.8883	0.938397		+	17.5469	18.6751	19.1391	20.1812	20.3568	20.3892	NA	1	NA	1	3	2
cup-2	WBGene00000843	F25D7.1	2.5524	0.966288	2.0631	0.932497			17.2883	20.8664	17.8794	21.5316	21.9989	20.1608	NA	1	NA	1	1	NA
lir-1	WBGene00003044	F18A1.3f	2.08953	1.29948	2.77295	0.927222			18.9793	20.0597	17.4997	21.1985	20.8089	20.7999	NA	NA	NA	1	2	1
K08E4.6	WBGene00010670	K08E4.6	1.8991	1.56553	3.40334	0.922784			20.5139	18.9403	18.8682	21.0946	21.3075	21.6176	1	NA	NA	2	2	3
pes-2.2	WBGene00010158	F56G4.3	1.84447	1.67585	3.68594	0.922046			20.7131	21.1573	19.5981	22.7034	22.0894	22.2091	NA	1	NA	3	6	6
F59E12.1	WBGene00019118	F59E12.1	1.73507	1.97355	4.52373	0.92117			18.384	19.6693	18.7733	20.5812	20.7221	20.7285	NA	1	NA	2	1	2
csn-4	WBGene00000816	Y55F3AM.15	2.4982	0.960448	2.05125	0.919168			17.4267	21.3397	20.5185	21.782	22.3538	22.6437	NA	2	1	4	5	6
chaf-2	WBGene00022141	Y71G12B.1b	1.7736	1.8177	4.07057	0.916251			18.3836	18.4826	18.0287	19.2567	20.3605	20.5985	NA	1	NA	1	2	1
csr-1	WBGene00017641	F20D12.1b	1.5485	2.90276	8.12001	0.915892		+	24.1874	23.7496	23.6373	25.2263	25.5122	25.4813	9	8	9	18	20	19
C27B7.5	WBGene00007762	C27B7.5	2.46823	0.95896	2.04823	0.912452			18.2558	17.925	17.8133	21.4878	21.8319	18.0791	NA	NA	NA	2	1	NA
R53.4	WBGene00011273	R53.4	1.91157	1.48354	3.2018	0.91156			18.1947	20.0952	19.5825	21.0205	21.5721	21.0145	NA	1	NA	1	3	3
C47G2.3	WBGene00008164	C47G2.3	2.17293	1.14827	2.4417	0.909206			21.2396	20.2922	18.3164	22.5138	21.7354	22.1178	1	2	NA	3	3	3
F32A11.1	WBGene00009307	F32A11.1	1.5517	2.74992	7.40019	0.907595			22.7331	22.4192	22.1081	23.9704	23.7875	24.1576	3	4	3	6	6	6
lin-13	WBGene00003002	C03B8.4	1.60013	2.43262	6.08239	0.90758			22.3548	21.9614	21.5935	23.4225	23.8591	23.4285	3	4	5	12	11	12
Y53G8AM.8	WBGene00021808	Y53G8AM.8	1.80023	1.67197	3.67576	0.90475			17.829	19.3777	18.6822	20.0334	20.6309	20.6253	NA	NA	NA	1	1	1
paa-1	WBGene00003901	F48E8.5	1.56987	2.55352	6.5584	0.90255			24.4024	24.2058	24.0642	25.3775	25.8885	26.116	9	8	6	21	28	23
ZK550.3	WBGene00013997	ZK550.3	1.65967	2.09077	4.88795	0.902217			21.3973	21.3306	20.5095	23.0243	22.3954	22.7967	2	2	1	5	7	5
ark-1	WBGene00000186	C01C7.1b	1.89677	1.45397	3.13078	0.900716			19.0337	19.0623	17.4815	20.0239	21.0266	20.2173	NA	NA	NA	1	2	1
dpf-7	WBGene00001060	R11E3.7a	1.62663	2.18898	5.20998	0.897594			20.9992	21.6504	20.9519	22.464	23.2116	22.8058	2	3	2	6	6	5
ehbp-1	WBGene00009098	F25B3.1	2.16217	1.09084	2.32011	0.889077			16.962	19.9511	19.4606	20.7724	20.9383	21.1495	NA	1	1	2	1	1
H04M03.3	WBGene00019153	H04M03.3	1.4322	3.67371	12.8419	0.888723			24.2792	24.4656	24.4719	25.8	25.7009	26.0124	5	9	8	12	15	12
acs-1	WBGene00018488	F46E10.1c	1.8973	1.37331	2.9413	0.8845			18.6026	20.2966	18.2065	20.8092	21.0603	20.9281	NA	3	NA	2	2	4
Y87G2A.1	WBGene00013593	Y87G2A.1	2.1843	1.04263	2.21963	0.879318			19.6694	17.7805	16.2946	19.919	20.3309	20.0475	NA	NA	NA	2	2	1
K04F10.3b	WBGene00019396	K04F10.3b	1.63063	1.98925	4.57131	0.878238			18.8055	18.2542	17.658	20.1327	19.7148	19.7621	NA	NA	NA	1	1	1
ufl-1	WBGene00015555	C06G3.9	1.76303	1.56245	3.39562	0.873131			17.6558	18.6918	18.3444	19.5252	20.833	19.6229	NA	1	NA	1	2	1
Y71G10AL.1b	WBGene00022134	Y71G10AL.1b	1.472	2.85487	7.88798	0.872755			24.8233	25.3989	25.1778	26.4605	26.7443	26.6112	7	16	12	24	24	26
kin-3	WBGene00002191	B0205.7	1.4521	3.02027	8.71586	0.871293			23.0762	23.5455	23.5664	24.775	24.8354	24.934	4	6	6	12	13	12
arl-8	WBGene00000192	Y57G11C.13	1.46777	2.83772	7.80637	0.869519			18.2748	18.1471	18.2826	19.3734	19.7294	20.005	NA	1	1	1	1	1
meg-1	WBGene00010492	K02B9.1	1.56293	2.19518	5.23084	0.868879		+	23.3653	22.4392	23.2515	24.6216	24.4541	24.6691	2	9	7	14	13	12
rsu-1	WBGene00007924	C34C12.5	2.13243	1.04646	2.22756	0.867797			19.5256	19.8694	16.8548	20.7463	21.0607	20.8401	NA	NA	NA	2	2	2
Y95B8A.8	WBGene00022388	Y95B8A.8	1.50407	2.47027	6.22739	0.86365			22.166	22.3844	22.3557	23.8709	24.1709	23.3765	3	5	5	10	11	8
retr-1	WBGene00018416	F44E2.2c	1.81927	1.39637	2.99487	0.863251			19.1452	20.213	18.155	20.9479	21.2268	20.7963	NA	1	NA	2	2	2
cnt-2	WBGene00000566	Y39A1A.15c	2.32507	0.90844	1.94638	0.862874			18.4304	18.4583	21.9661	22.292	22.0042	21.5338	NA	NA	1	2	3	2
mre-11	WBGene00003405	ZC302.1	1.5849	2.01236	4.64199	0.860691			20.1002	21.2101	20.5537	22.0011	22.2266	22.391	1	2	1	3	4	3
R53.5	WBGene00011274	R53.5	1.52167	2.25889	5.44918	0.855231			19.8662	19.8552	20.6064	21.4629	21.5495	21.8804	1	2	1	4	5	4
K07C5.4	WBGene00010627	K07C5.4	1.8357	1.32258	2.82513	0.853903			20.8342	22.3413	22.9077	23.4682	24.0315	24.0906	1	3	5	9	9	9
smg-2	WBGene00004880	Y48G8AL.6	1.82633	1.33633	2.8564	0.853673			21.3644	23.135	21.8503	23.2245	24.2528	24.3514	1	8	3	14	13	12
cdc-48.3	WBGene00010562	K04G2.3	1.57557	1.97506	4.52828	0.852608			18.1487	19.0433	18.0757	19.8689	20.3084	19.8171	NA	1	NA	2	2	2
EEED8.2	WBGene00017133	EEED8.2	1.46797	2.54781	6.5352	0.85118			19.305	19.2659	19.9223	21.0432	21.0332	20.8207	1	1	1	2	2	2
D2005.4	WBGene00008399	D2005.4	1.32657	4.54933	21.3942	0.849271			23.4748	23.613	23.6358	24.9676	24.8428	24.8929	4	4	4	10	12	11
K08E3.5c	WBGene00010665	K08E3.5c	1.62633	1.73995	3.85666	0.846302			25.9258	27.2245	26.3234	27.7717	28.2592	28.3218	17	30	25	35	34	41
rpa-1	WBGene00017546	F18A1.5	1.36887	3.40484	10.9601	0.842434			27.2457	27.3684	27.4812	28.5705	28.7022	28.9292	28	35	31	50	51	50
ddx-17	WBGene00010260	F58E10.3a	1.3755	3.29875	10.2923	0.841983			25.3321	25.4773	25.6535	26.6995	26.8578	27.0321	15	21	21	30	33	31
pgam-5	WBGene00019941	R07G3.5	1.3287	4.08066	16.2928	0.840124			26.0782	26.2323	26.3279	27.4755	27.603	27.546	14	16	16	21	21	21
tba-7	WBGene00006533	T28D6.2	1.49523	2.22164	5.32067	0.839536			24.7163	25.5813	24.8784	26.715	26.3957	26.551	3	7	6	7	6	6
C04H5.1	WBGene00007312	C04H5.1	1.9515	1.10518	2.35028	0.837436			19.2291	19.6586	17.0187	20.8239	20.3283	20.6087	2	2	NA	1	1	1
mes-6	WBGene00003224	C09G4.5	1.83323	1.2422	2.64545	0.835957			19.1048	19.5951	17.5198	19.9926	20.7571	20.9697	NA	1	NA	2	2	1
tba-1	WBGene00006528	F26E4.8a	1.51133	2.08827	4.87998	0.835129			23.5094	24.4418	23.7966	25.1451	25.5656	25.5711	4	5	6	7	5	8
ztf-4	WBGene00020399	T10B11.3	1.38977	2.94176	8.31352	0.833608			24.0928	23.6187	23.8485	25.0576	25.2932	25.3785	5	11	8	10	10	8
dis-3	WBGene00001001	C04G2.6	2.06817	0.98465	2.10048	0.832388			17.448	19.8939	16.6213	20.1535	19.9342	20.08	NA	1	NA	1	1	1
cey-2	WBGene00000473	F46F11.2	1.4508	2.3972	5.94859	0.831933			27.2577	26.7754	27.2867	28.9145	28.3969	28.3608	21	24	26	29	29	31
hrp-2	WBGene00002000	F58D5.1a	1.34857	3.40038	10.9312	0.830721			27.7823	28.1351	28.1169	29.3325	29.2987	29.4488	36	43	39	53	55	50
cpf-1	WBGene00000773	F28C6.3	1.9327	1.09279	2.32422	0.828934			17.893	20.2789	18.078	20.083	21.1897	20.7753	NA	1	NA	2	2	3
ZK1098.4	WBGene00014221	ZK1098.4	1.54593	1.85878	4.18675	0.827036			24.2128	25.2142	24.5085	25.7792	26.5277	26.2664	8	18	9	18	22	24
meg-2	WBGene00010493	K02B9.2	1.5277	1.91484	4.34903	0.825216		+	18.833	18.8044	17.7849	19.8724	20.1007	20.0323	NA	NA	NA	1	1	1
F26B1.2c	WBGene00017816	F26B1.2c	1.36487	3.04237	8.83226	0.824926			24.8082	25.1497	25.3077	26.5121	26.3618	26.4863	10	12	9	17	20	18
pptr-1	WBGene00012348	W08G11.4	1.4104	2.5609	6.58844	0.822836			24.4061	23.6827	24.1492	25.4987	25.4311	25.5394	13	12	10	16	19	17
W09B6.4a	WBGene00021104	W09B6.4a	1.87103	1.13553	2.41454	0.822468			17.9915	20.5161	18.5948	20.6309	21.125	20.9596	NA	3	NA	2	3	1
mex-6	WBGene00003231	AH6.5	1.27997	4.52107	21.0464	0.820062			23.7247	23.6885	23.8665	25.0099	25.0945	25.0152	5	5	6	8	7	8
gsp-1	WBGene00001747	F29F11.6b	1.44837	2.25597	5.43903	0.820004			23.0722	23.9697	23.4538	24.8327	25.0122	24.9959	6	9	5	10	12	13
C34C12.2	WBGene00007921	C34C12.2	1.4384	2.31118	5.63378	0.819453			18.3603	18.5639	17.9261	19.6004	20.0625	19.5026	NA	NA	NA	2	3	1
cchl-1	WBGene00011527	T06D8.6	2.6007	0.707454	1.54976	0.81831			17.1192	22.488	21.7194	23.0605	23.171	22.8972	NA	5	2	5	4	5
C17E4.20	WBGene00219313	C17E4.20	1.54667	1.75688	3.90256	0.815615			19.7884	19.2724	19.7512	20.4428	21.6168	21.3924	1	1	1	3	3	3
wago-1	WBGene00011061	R06C7.1	1.3266	3.25328	10.018	0.812657		+	24.2723	23.8396	23.9644	25.3049	25.339	25.4122	10	12	8	20	17	18
asg-2	WBGene00000210	C53B7.4	1.79987	1.17953	2.50882	0.811696			18.7442	20.7249	18.4383	21.0838	21.1656	21.0576	NA	2	1	1	1	1
rpn-7	WBGene00004463	F49C12.8	1.38367	2.59918	6.74625	0.811486			24.2598	24.0718	23.9777	25.1697	25.4716	25.819	9	11	9	14	15	15
sqst-1	WBGene00011737	T12G3.1a	1.5096	1.85523	4.17662	0.810985			20.486	21.7369	21.109	22.5902	22.6281	22.6424	2	5	4	5	4	5
F08D12.1	WBGene00017245	F08D12.1	1.4722	2.01967	4.66454	0.810855			20.8657	21.6651	21.8257	22.7196	22.9721	23.0814	2	4	5	8	7	7
ssup-72	WBGene00020480	T13C2.4	1.49027	1.8686	4.21485	0.803996			18.3911	19.1914	18.6144	20.3092	20.6252	19.7333	1	1	NA	2	2	2
Y43F8C.6a	WBGene00012828	Y43F8C.6a	1.83527	1.10057	2.34057	0.803492			17.9452	19.7994	20.1163	20.3875	21.7431	21.2361	NA	1	1	1	1	1
ergo-1	WBGene00019971	R09A1.1	1.2948	3.48218	11.4726	0.802797			24.4476	24.2703	24.4423	25.5119	25.686	25.8467	10	11	9	19	28	24
atg-7	WBGene00010882	M7.5	1.245	4.78137	24.4723	0.802773			20.2988	20.3562	20.211	21.5888	21.4944	21.5178	1	2	1	3	4	3
trm-1	WBGene00006613	ZC376.5	1.70373	1.28176	2.73324	0.802384			18.449	17.663	17.2469	18.4645	20.0676	19.938	NA	NA	NA	NA	1	1
tag-307	WBGene00022787	ZK652.10	1.96387	0.960696	2.05175	0.799241			18.6182	20.3198	21.8774	21.9644	22.1816	22.561	NA	2	1	3	2	3
K04F10.7	WBGene00019399	K04F10.7	1.37037	2.50205	6.352	0.798704			21.2259	20.5541	21.0156	22.159	22.4523	22.2954	2	3	2	3	3	3
pole-2	WBGene00017237	F08B4.5	1.97997	0.945143	2.02026	0.798356			21.3306	18.5066	21.415	21.9778	22.5105	22.7038	3	1	2	4	3	3
tag-196	WBGene00007055	F41E6.6	1.25253	4.25557	18.0392	0.79808			24.2945	24.4851	24.459	25.6067	25.6601	25.7294	6	8	9	8	9	8
aagr-3	WBGene00009583	F40F9.6b	1.51277	1.71503	3.78969	0.796537			17.7121	18.8184	18.2512	20.2402	19.4476	19.6322	NA	NA	NA	NA	2	1
F09G2.8a	WBGene00017316	F09G2.8a	1.50243	1.72149	3.80698	0.792986			20.1038	20.5827	20.6775	21.3089	22.5211	22.0413	2	3	3	3	3	3
acr-21	WBGene00000060	F27B3.2	2.17303	0.804867	1.74063	0.790648			26.0895	22.8448	23.0867	27.5433	25.3778	25.619	1	1	1	2	1	1
agt-1	WBGene00000093	Y62E10A.5b	1.76023	1.1315	2.40599	0.788775			20.8805	18.3821	19.3478	21.4521	21.2398	21.1992	1	NA	NA	1	2	1
F39B2.1	WBGene00009553	F39B2.1	1.27517	3.36593	10.7106	0.787599			22.492	22.3694	22.2653	23.7805	23.7163	23.4554	2	2	2	3	4	4
K02F3.2a	WBGene00019326	K02F3.2a	1.38283	2.23256	5.35808	0.786557			23.0052	22.3855	22.7344	23.7438	24.378	24.1518	4	7	6	11	15	13
skr-1	WBGene00004807	F46A9.5	1.38453	2.2172	5.30552	0.786237			23.4214	23.1369	23.5816	24.3167	25.0448	24.932	2	4	5	6	9	9
act-1	WBGene00000063	T04C12.6	2.85023	0.593247	1.32721	0.781415			19.306	26.0046	22.9721	24.0011	27.2163	25.616	NA	7	2	4	8	4
C41G7.9a	WBGene00077771	C41G7.9a	1.31327	2.61357	6.80642	0.775729			21.1817	20.9252	21.4528	22.4214	22.3455	22.7326	3	3	2	3	6	4
acs-13	WBGene00022037	Y65B4BL.5b	1.36017	2.22563	5.33432	0.775031			20.5269	20.7156	20.5633	21.5051	22.0221	22.3591	1	3	2	4	4	6
daf-15	WBGene00000911	C10C5.6a	1.73977	1.08491	2.30768	0.77189			17.5663	19.2051	16.7188	19.2863	19.9289	19.4943	NA	2	NA	2	2	2
cyk-1	WBGene00000872	F11H8.4a	1.51947	1.49749	3.2356	0.771456			17.5829	18.7027	17.841	18.9234	19.7703	19.9913	NA	NA	NA	NA	2	2
F10D11.2	WBGene00008648	F10D11.2	1.63563	1.23073	2.62022	0.769987			20.529	18.8862	20.2193	21.5426	20.8619	22.1369	1	NA	1	5	5	4
cey-3	WBGene00000474	M01E11.5	1.338	2.30907	5.62624	0.769933			27.2733	26.7821	27.201	28.782	28.2983	28.1901	24	25	27	32	34	32
cka-1	WBGene00000509	C28D4.2b	1.71797	1.09843	2.33606	0.768524			18.94	19.8461	17.5304	19.9301	20.9299	20.6104	NA	1	NA	1	2	2
csn-2	WBGene00000814	B0025.2	1.30827	2.52117	6.42801	0.767976			21.5516	22.1444	21.6468	22.9263	23.2256	23.1157	2	6	2	8	8	9
abcf-2	WBGene00012097	T27E9.7	1.34097	2.25325	5.42955	0.767593			24.9738	25.6727	25.4977	26.4814	26.9276	26.7581	9	18	13	20	24	19
ddb-1	WBGene00010890	M18.5	1.33747	2.27129	5.4925	0.767113			20.162	20.0059	20.2966	21.2864	21.2418	21.9487	1	3	2	2	2	4
oma-2	WBGene00003865	ZC513.6	1.3755	2.02477	4.6803	0.766769		+	22.0517	21.5547	22.177	23.749	23.1229	23.038	2	3	1	5	4	4
cey-4	WBGene00000475	Y39A1C.3	1.1988	4.2997	18.5081	0.766118			28.2577	28.1311	28.294	29.4956	29.3508	29.4328	24	27	29	32	36	35
mics-1	WBGene00011890	T21C9.1	1.5869	1.30022	2.77463	0.765903			17.8029	18.204	19.6535	20.0386	20.0307	20.3518	1	NA	1	1	1	1
tba-2	WBGene00006529	C47B2.3	1.33937	2.23393	5.36278	0.765461			27.9806	28.6773	28.3444	29.3787	29.844	29.7977	31	41	35	44	50	46
rpb-8	WBGene00017830	F26F4.11	1.2143	3.7763	13.6383	0.764174			21.3927	21.6254	21.5862	22.7038	22.6897	22.8537	1	1	2	3	2	4
EEED8.4	WBGene00017135	EEED8.4	1.3523	2.12169	4.98764	0.763524			17.5114	17.1711	18.0166	18.6994	19.0874	18.9692	NA	NA	NA	1	1	1
rpn-12	WBGene00004468	ZK20.5	2.37477	0.666667	1.47025	0.762313			17.8738	22.6131	22.8142	23.3704	23.5464	23.5086	NA	4	4	3	5	5
mog-5	WBGene00003393	EEED8.5	1.6917	1.10074	2.34092	0.761114			17.7633	18.5428	17.1549	18.3187	20.2299	19.9875	NA	NA	NA	NA	2	2
B0513.4b	WBGene00007196	B0513.4b	1.34573	2.09891	4.91405	0.758649			19.0361	19.5375	19.3599	21.1135	20.3654	20.4918	NA	1	1	1	1	2
F53H1.1b	WBGene00018776	F53H1.1b	1.40023	1.78544	3.98087	0.756171			27.4476	26.9942	26.7904	29.0616	28.2329	28.1384	4	4	3	6	7	7
edc-3	WBGene00011036	R05D11.8	1.2271	3.18318	9.60838	0.753881			25.4013	25.1016	25.4583	26.4199	26.6127	26.6099	16	22	19	27	30	32
hke-4.2	WBGene00006494	H13N06.5	1.30213	2.27454	5.50391	0.749825			18.3125	18.6582	18.8852	20.156	20.0111	19.5952	NA	NA	NA	2	2	1
sptf-3	WBGene00012735	Y40B1A.4	1.31283	2.1885	5.20835	0.749307			21.8089	21.1444	21.8951	22.9594	22.7683	23.0592	3	5	3	5	4	4
gpr-1	WBGene00001688	F22B7.13	1.5721	1.22596	2.60976	0.747767			18.259	19.1819	18.9385	19.3513	21.1702	20.5742	NA	1	NA	1	2	2
pbs-2	WBGene00003948	C47B2.4	2.10723	0.725094	1.58419	0.744563			17.3919	21.8601	20.4823	21.7141	22.2238	22.1181	1	2	1	2	4	3
srh-32	WBGene00005255	Y26G10.2	2.04483	0.749156	1.63124	0.742619			20.4046	18.0889	19.376	23.1037	21.4605	19.4398	NA	NA	NA	1	1	NA
apd-3	WBGene00000162	W09G10.4b	1.59183	1.15774	2.46197	0.741571			18.6826	20.7362	18.9741	21.1885	21.0704	20.9095	NA	1	NA	2	2	2
C10C5.2	WBGene00007506	C10C5.2	2.23347	0.664772	1.46656	0.738841			19.3614	19.3806	18.7015	22.728	23.0421	18.3738	NA	NA	NA	1	1	NA
gsk-3	WBGene00001746	Y18D10A.5	1.209	3.04762	8.86012	0.738792			24.3618	24.4376	24.684	25.5415	25.6961	25.8728	8	10	7	15	15	16
swan-2	WBGene00009976	F53C11.7	1.26107	2.4343	6.08882	0.738714			20.6419	20.323	20.972	21.8281	21.8091	22.0829	1	1	1	3	3	3
Y97E10AR.7	WBGene00022402	Y97E10AR.7	1.7466	0.942928	2.01579	0.738064			19.0729	16.3403	17.5912	18.7057	19.706	19.8325	NA	NA	NA	NA	1	1
cpsf-2	WBGene00017313	F09G2.4	1.33613	1.89181	4.28185	0.737362			18.0836	18.8607	18.1787	19.5763	19.463	20.0921	NA	NA	NA	NA	1	1
lpr-4	WBGene00012257	W04G3.3	1.93507	0.793753	1.71875	0.736927			18.256	21.5843	18.165	21.1944	21.3541	21.262	NA	1	NA	2	3	3
rpb-3	WBGene00007971	C36B1.3	1.15267	4.22618	17.7335	0.736528			21.7991	21.9956	21.9097	23.0618	22.9962	23.1044	1	3	2	4	5	6
teg-4	WBGene00019323	K02F2.3	1.32933	1.91686	4.35496	0.736372			21.6981	22.1268	21.4738	22.7146	23.0399	23.5322	2	1	1	5	7	7
tag-72	WBGene00006447	C25A1.3	1.50397	1.29679	2.7669	0.735956			18.857	20.5935	20.0666	21.4909	21.547	20.9911	1	2	1	2	3	2
Y65B4A.6a	WBGene00022029	Y65B4A.6a	1.3155	1.96763	4.5059	0.734116			22.7852	23.6381	22.9213	24.1834	24.5542	24.5535	3	6	4	10	10	10
lsy-2	WBGene00003087	F49H12.1b	1.32183	1.91764	4.35726	0.732982			20.3323	20.2906	20.5797	21.1892	22.1849	21.794	1	1	1	2	2	2
arx-4	WBGene00021170	Y6D11A.2	1.42873	1.46508	3.15736	0.731742			17.739	16.4569	17.8428	18.9024	18.7902	18.6323	NA	NA	NA	1	3	1
dnj-12	WBGene00001030	F39B2.10	1.1874	3.15505	9.44848	0.730406			25.4513	25.5858	25.4675	26.8829	26.4746	26.7093	10	17	11	21	24	23
ragc-1	WBGene00012497	Y24F12A.2a	1.16503	3.59072	12.2304	0.730311			19.6237	19.7348	19.5047	20.8166	20.8861	20.6556	1	1	1	1	1	1
dhs-24	WBGene00000987	Y60A3A.10	1.25243	2.32694	5.69041	0.728118			21.4532	20.8009	20.786	22.2503	22.2729	22.2742	1	3	1	4	5	3
cyn-4	WBGene00000880	F59E10.2	1.8305	0.827294	1.78488	0.72479			17.4538	20.8438	19.8945	21.4404	21.3727	20.8705	NA	2	2	3	3	2
acdh-9	WBGene00017874	F28A10.6	1.48917	1.25859	2.68168	0.724545			18.4121	20.1623	19.8768	20.9999	21.1665	20.7523	NA	2	1	2	2	2
dpl-1	WBGene00001061	T23G7.1	1.21173	2.63457	6.89503	0.723103			22.4466	22.2839	22.2663	23.2999	23.8612	23.4709	2	6	3	9	8	10
mei-1	WBGene00003183	T01G9.5a	1.48503	1.25001	2.66267	0.721688			18.569	18.2125	19.9563	20.7164	20.1477	20.3288	NA	NA	1	2	5	4
B0001.8a	WBGene00007093	B0001.8a	1.22213	2.3317	5.70761	0.712979			20.298	20.315	20.5062	21.5256	21.9772	21.2828	1	1	2	3	3	3
rae-1	WBGene00003803	F10G8.3	1.41043	1.36881	2.93091	0.711899			21.4863	22.825	21.3972	23.0436	23.4276	23.4686	2	6	2	8	7	8
toc-1	WBGene00006590	ZC395.3a	1.69123	0.897907	1.92528	0.71107			16.3871	19.158	18.7094	19.4127	20.0201	19.8954	NA	1	NA	1	2	1
lit-1	WBGene00003048	W06F12.1e	1.11477	4.04752	15.981	0.710153			23.0797	23.1088	23.1457	24.0954	24.3176	24.2655	5	7	5	8	9	8
C30A5.3	WBGene00016238	C30A5.3	1.7921	0.809287	1.74934	0.709899			18.2244	21.6394	20.6329	21.6842	22.2085	21.9803	NA	2	2	2	3	3
ben-1	WBGene00000248	C54C6.2	1.25837	1.97496	4.528	0.707779			21.728	22.4992	21.9397	23.599	23.0619	23.2811	3	5	4	2	5	4
sor-1	WBGene00023405	ZK1236.3b	1.1163	3.83159	14.0871	0.706858			17.9591	17.7419	17.7675	18.933	18.8735	19.0109	NA	NA	NA	2	NA	1
D1005.1	WBGene00016995	D1005.1	1.29693	1.74036	3.85775	0.706318			22.5731	23.4733	22.4673	23.9731	24.098	24.3334	3	6	3	10	12	11
swd-2.2	WBGene00016374	C33H5.7	1.19093	2.50831	6.37683	0.706048			21.4049	21.0297	21.3405	22.4241	22.2091	22.7147	1	2	1	5	4	6
Y37D8A.21	WBGene00012558	Y37D8A.21	1.8406	0.761618	1.65565	0.70475			17.4302	17.6567	19.6703	18.5674	21.5202	20.1914	NA	NA	1	NA	1	1
nra-4	WBGene00015344	C02E11.1a	1.17123	2.70655	7.20656	0.704491			25.1709	24.7581	25.0179	26.0495	26.0395	26.3716	15	15	17	25	27	30
thoc-1	WBGene00020172	T02H6.2	1.11063	3.85381	14.2715	0.703903			21.7156	21.5612	21.6265	22.6412	22.8608	22.7332	2	3	3	4	5	7
bath-40	WBGene00013689	Y105E8B.4	1.30673	1.64633	3.60897	0.70176			20.3055	21.3992	21.3468	22.1941	22.3774	22.4002	1	5	3	3	4	5
pri-2	WBGene00004181	W02D9.1a	1.09533	4.17774	17.2407	0.700551			20.8593	20.9439	20.929	22.0344	22.0892	21.8946	3	2	2	3	4	4
C01B10.8	WBGene00015282	C01B10.8	1.2322	2.02853	4.69196	0.699073			20.8899	21.6868	21.6286	22.6238	22.5417	22.7364	2	4	3	6	7	6
zwl-1	WBGene00021460	Y39G10AR.2b	1.23583	1.97849	4.53865	0.697308			24.2973	24.9997	24.491	25.4897	25.9479	26.0579	10	16	11	15	19	20
Y110A7A.2	WBGene00022454	Y110A7A.2	1.91783	0.69715	1.52966	0.69644			17.2931	18.5513	18.5123	17.6966	21.5179	20.8957	NA	NA	NA	NA	1	1
hpo-35	WBGene00009744	F45H11.3	2.08927	0.622328	1.38389	0.694177			18.58	23.3167	22.8614	23.7	23.7532	23.5727	NA	6	2	7	9	8
atp-2	WBGene00000229	C34E10.6	1.16837	2.50648	6.36957	0.69404			29.0196	29.5778	29.2749	30.2889	30.5108	30.5777	37	57	46	64	77	77
pme-3	WBGene00004051	F20C5.1e	1.33207	1.47101	3.17161	0.693786			18.8036	18.5729	17.5937	19.5221	19.4009	20.0434	NA	1	NA	1	2	2
aakg-2	WBGene00020633	T20F7.6	1.31363	1.52491	3.30263	0.692204			18.8836	18.9015	19.5077	19.7363	20.8309	20.6665	NA	1	NA	2	2	2
his-74	WBGene00012276	W05B10.1	2.57923	0.506	1.15637	0.6914			18.5685	25.1414	25.2582	24.9829	25.9387	25.7842	NA	1	1	2	3	3
lin-61	WBGene00003041	R06C7.7a	1.27437	1.66037	3.64546	0.689005			22.3525	23.2552	23.2765	24.3324	24.4728	23.9021	2	5	3	8	9	8
C43E11.9	WBGene00016607	C43E11.9	1.81963	0.726118	1.58619	0.687388			18.0805	21.5501	21.4765	22.1648	22.0658	22.3354	NA	1	1	3	3	4
sgo-1	WBGene00016381	C33H5.15a	1.2147	1.94919	4.45064	0.685138			17.6504	18.468	18.2886	19.3968	19.52	19.1343	NA	NA	NA	1	1	1
pyr-1	WBGene00004259	D2085.1	1.18143	2.19157	5.2187	0.68434			24.2654	24.4596	23.9274	25.1301	25.3689	25.6977	11	15	9	25	28	28
ran-2	WBGene00004303	C29E4.3b	1.31897	1.43178	3.07805	0.683931			21.6477	22.9573	22.4349	23.272	23.8547	23.8701	1	5	3	8	10	9
rad-51	WBGene00004297	Y43C5A.6b	1.34393	1.35099	2.88992	0.683921			22.7702	24.1534	23.5173	24.3637	25.1564	24.9526	5	7	5	9	11	12
mcm-5	WBGene00003157	R10E4.4	1.13253	2.69392	7.15104	0.682918			27.3486	27.0194	27.3828	28.1763	28.4313	28.5408	39	37	40	59	65	64
zbp-1	WBGene00010908	M88.5a	1.15203	2.44447	6.12773	0.682483			24.2615	24.6325	24.6709	25.7941	25.4036	25.8233	8	11	9	15	15	17
F53E10.1	WBGene00018758	F53E10.1	1.5173	0.981806	2.09468	0.682129			18.3461	19.8511	17.4133	19.956	19.8711	20.3353	NA	1	NA	1	1	1
raga-1	WBGene00006414	T24F1.1	1.2049	1.96693	4.5038	0.681686			22.4239	21.7824	21.8295	22.8766	23.3795	23.3944	3	4	2	5	6	6
xpo-2	WBGene00002079	Y48G1A.5a	1.10283	3.11844	9.24401	0.681055			25.1685	24.9419	24.9272	25.94	26.2396	26.1665	14	20	15	33	38	37
lin-24	WBGene00003010	B0001.1a	1.68077	0.801455	1.73391	0.680651			18.3488	21.1261	18.2869	21.2844	21.0721	20.4476	NA	3	NA	2	1	1
ufd-1	WBGene00006733	F19B6.2a	1.46243	1.05836	2.25225	0.680417			18.6137	20.4444	19.99	20.4655	21.3863	21.5836	NA	1	1	1	3	2
eel-1	WBGene00022069	Y67D8C.5a	1.20597	1.93705	4.41453	0.680115			20.9372	21.6536	21.0184	22.5728	22.5505	22.1038	2	9	4	11	10	9
ucr-2.3	WBGene00020757	T24C4.1	1.1952	1.9925	4.5812	0.678747			25.607	25.7834	25.2994	26.3316	26.8851	27.0587	14	16	18	20	25	21
mdt-17	WBGene00007017	Y113G7B.18a	1.31383	1.39955	3.00228	0.678068			17.5116	18.7467	18.7739	19.9122	19.4528	19.6087	NA	1	1	1	1	1
B0393.3	WBGene00007168	B0393.3	1.20563	1.90757	4.32773	0.677862			19.9666	20.2749	20.0169	20.793	21.6786	21.4037	1	1	1	5	2	4
ttr-50	WBGene00010234	F58B3.9	1.26323	1.58833	3.46062	0.677326			22.1805	22.5987	21.3894	23.2884	23.1872	23.4827	3	4	2	5	6	7
rha-1	WBGene00004355	T07D4.3	1.27227	1.53195	3.31994	0.675581			21.4183	20.3598	21.2452	21.9207	22.6058	22.3136	1	3	2	5	5	4
imp-2	WBGene00011481	T05E11.5	1.62067	0.833643	1.79744	0.674813			16.8568	19.0514	19.034	18.8827	20.334	20.5875	NA	1	1	1	2	3
mtr-4	WBGene00012342	W08D2.7	1.32157	1.34447	2.87499	0.67438			17.8819	18.5033	17.1652	19.3468	19.4873	18.681	NA	NA	NA	1	1	1
EEED8.3	WBGene00017134	EEED8.3	1.37973	1.17915	2.50799	0.672996			18.2837	19.8739	19.9202	20.7567	20.929	20.5313	NA	1	1	1	1	1
trxr-1	WBGene00015553	C06G3.7b	1.7399	0.733926	1.60145	0.672698			15.9072	19.6543	17.9304	19.4106	19.585	19.716	NA	1	NA	1	1	1
vha-16	WBGene00016258	C30F8.2	1.3224	1.32813	2.83774	0.672633			18.3036	19.1951	18.9361	19.4698	20.7982	20.134	NA	1	2	3	3	2
rpa-2	WBGene00019767	M04F3.1	1.10567	2.80337	7.64514	0.672292			26.3908	26.4469	26.6642	27.5146	27.4635	27.8408	13	15	16	21	25	23
Y6D1A.1	WBGene00012395	Y6D1A.1	1.1518	2.23351	5.36134	0.671668			22.3646	21.7471	22.3912	23.3184	23.3951	23.2448	3	2	3	3	2	3
mec-7	WBGene00003171	ZK154.3	1.07103	3.45789	11.3092	0.671619			22.6807	22.7317	22.8343	23.7349	23.7385	23.9864	3	6	5	8	12	10
iars-2	WBGene00002153	C25A1.7a	1.4299	1.05478	2.24481	0.669122			21.6568	23.7532	23.1793	24.3373	24.4759	24.0658	1	1	1	1	2	1
C55A6.6	WBGene00008335	C55A6.6	1.3866	1.13293	2.40903	0.668053			17.3556	18.8936	19.032	19.4095	20.0903	19.9412	NA	1	1	1	1	1
F02A9.4b	WBGene00008514	F02A9.4b	1.64583	0.788224	1.70787	0.66804			18.3563	21.1919	21.2916	21.8297	21.9375	22.0101	NA	2	2	2	2	3
wapl-1	WBGene00019953	R08C7.10a	1.1378	2.29558	5.57818	0.667734			21.574	21.6888	22.1859	23.1087	22.9097	22.8437	3	4	5	6	8	8
tax-6	WBGene00006527	C02F4.2a	1.5186	0.904616	1.93871	0.665089			16.9418	17.7014	19.4901	19.1524	19.8185	19.7182	NA	NA	1	1	2	1
rps-0	WBGene00004469	B0393.1	1.17957	1.89632	4.29493	0.664679			27.8304	28.6496	28.2853	29.157	29.5755	29.5715	25	31	29	32	34	34
thoc-3	WBGene00009341	F32H2.4	1.06693	3.24201	9.95102	0.663838			22.6264	22.7411	22.5902	23.904	23.5748	23.6797	2	4	3	4	4	4
F57B10.14	WBGene00019007	F57B10.14	1.14863	2.11913	4.97933	0.663689			22.662	22.0558	22.2125	23.3412	23.2933	23.7417	2	2	2	2	3	2
imb-2	WBGene00002076	R06A4.4a	1.1512	2.08827	4.87999	0.663171			20.2918	20.54	20.8502	21.3716	21.8391	21.9249	2	2	3	5	4	5
zfp-3	WBGene00021047	W05H7.4b	1.28353	1.37505	2.94532	0.663055			19.2413	18.543	17.7599	19.9602	19.7461	19.6885	NA	NA	NA	NA	1	1
T27C4.1	WBGene00020854	T27C4.1	1.36333	1.12738	2.39723	0.659025			18.005	19.2185	17.7529	20.1738	19.8704	19.0222	NA	1	NA	NA	1	1
C05C8.5	WBGene00015462	C05C8.5	1.27977	1.35171	2.89157	0.658796			19.1343	18.3122	18.0316	19.2555	20.2734	19.7885	NA	1	NA	1	1	1
sdz-30	WBGene00011432	T04D3.2	1.24557	1.47004	3.16928	0.657981			22.5411	21.7041	21.2102	22.9448	23.1326	23.1147	1	4	4	6	6	6
K11B4.1	WBGene00010766	K11B4.1	1.25517	1.4277	3.06842	0.657479			19.4846	18.425	19.4354	20.8088	20.1541	20.1476	1	NA	1	1	2	1
F26E4.6	WBGene00009161	F26E4.6	1.2673	1.35	2.88766	0.653629			19.7576	19.1592	19.5842	20.7584	20.0773	21.4672	1	1	1	1	1	1
F55F8.2b	WBGene00018890	F55F8.2b	1.14207	1.99885	4.60058	0.653265			18.5671	18.2639	18.5041	19.1334	19.8839	19.744	1	1	1	1	1	1
hda-3	WBGene00001836	R06C1.1	1.1508	1.89252	4.28389	0.650672			25.5564	26.3323	26.0434	26.8489	27.2028	27.3328	13	25	23	25	24	23
ppw-1	WBGene00004093	C18E3.7c	1.1876	1.65581	3.63359	0.650085			21.2674	21.7099	21.2448	22.1608	23.1442	22.4799	2	4	3	5	9	6
vet-2	WBGene00016453	C35E7.1b	1.46703	0.90451	1.9385	0.650054			20.644	18.2749	19.6457	21.23	20.3582	21.3775	1	NA	NA	1	3	3
Y75B8A.19	WBGene00013554	Y75B8A.19	1.41087	0.984951	2.10109	0.649722			17.9508	19.7394	19.9458	20.6449	20.2262	20.9975	NA	2	1	2	3	2
npp-18	WBGene00003804	Y43F4B.4	1.0715	2.68183	7.09822	0.649019			23.4524	23.7831	23.4467	24.7458	24.4285	24.7224	7	12	9	14	14	12
copd-1	WBGene00015734	C13B9.3	1.0276	3.50581	11.6336	0.646969			23.8168	23.9959	23.929	24.8027	24.9832	25.0386	5	7	6	10	11	12
panl-3	WBGene00014015	ZK632.7	1.22433	1.40239	3.00894	0.642055			21.2249	22.2154	22.4301	23.0101	23.0187	23.5146	1	4	2	7	11	7
H28G03.1a	WBGene00019249	H28G03.1a	1.09547	2.21029	5.28199	0.641601			21.2109	20.5035	20.8767	21.9216	21.9255	22.0304	1	2	2	6	6	5
E04A4.5	WBGene00017119	E04A4.5	1.22897	1.37015	2.93401	0.640464			18.6841	17.424	17.5176	19.2032	18.8931	19.2163	NA	NA	NA	1	1	1
dcap-2	WBGene00003582	F52G2.1a	1.03853	2.96443	8.42791	0.639796		+	23.1128	22.8854	23.3042	24.1082	24.1844	24.1254	4	5	3	7	10	8
cyp-44A1	WBGene00000375	ZK177.5	1.63077	0.709177	1.55312	0.639517			17	19.5058	20.4456	20.8382	20.8151	20.1904	NA	1	1	1	2	2
F46B6.12	WBGene00009776	F46B6.12	1.27633	1.19042	2.53236	0.63689			18.9009	19.1123	18.2025	20.8366	19.4338	19.7743	1	1	NA	2	2	2
bpl-1	WBGene00000259	F13H8.10c	1.7949	0.607843	1.35567	0.635589			22.0501	21.1025	18.1023	21.8798	23.3433	21.4165	1	1	1	3	2	2
F22B5.10	WBGene00009045	F22B5.10	1.0622	2.45226	6.15765	0.635097			20.4673	20.2117	20.2654	21.0955	21.6258	21.4097	1	1	1	1	2	2
smg-4	WBGene00004882	F46B6.3a	1.13883	1.6913	3.72663	0.630725			21.3481	21.4363	20.9635	22.9127	22.023	22.2287	3	3	2	5	4	5
tdpt-1	WBGene00013405	Y63D3A.4	1.38297	0.931735	1.9932	0.630386			17.7997	18.4814	19.8308	20.243	20.6068	19.411	NA	NA	NA	1	1	1
kars-1	WBGene00002238	T02G5.9a	1.02863	2.73174	7.31845	0.627004			27.6	27.9307	27.8179	28.6149	28.8649	28.9547	40	47	43	49	52	51
calu-2	WBGene00017240	F08B6.3	1.3457	0.965538	2.06158	0.625107			18.1487	20.3607	19.009	20.5327	20.6978	20.325	NA	1	NA	2	2	1
emc-3	WBGene00013378	Y62E10A.10	1.20903	1.29955	2.77312	0.624506			17.8548	18.6795	19.0708	19.8245	20.1282	19.2795	NA	NA	NA	1	1	1
pqn-85	WBGene00004166	Y43H11AL.3	1.49997	0.763037	1.65844	0.62383			19.7509	17.0976	18.2116	18.9037	20.3796	20.2767	NA	NA	1	NA	2	3
mrps-18B	WBGene00011759	T13H5.5	1.0536	2.29466	5.57494	0.623805			21.3555	21.9101	21.4881	22.6503	22.4799	22.7843	3	5	3	4	6	5
Y48G1C.8a	WBGene00021681	Y48G1C.8a	1.48483	0.776804	1.68544	0.623624			18.9651	20.499	17.4623	20.5909	20.2945	20.4955	NA	1	NA	2	2	2
nhl-2	WBGene00003598	F26F4.7	1.00413	3.0553	8.90106	0.622598			23.7915	23.4655	23.6149	24.719	24.5095	24.6558	5	12	10	12	15	14
F10E7.5	WBGene00017347	F10E7.5	1.3678	0.912612	1.95475	0.621803			16.7797	18.8023	18.5475	19.1187	19.9945	19.1197	NA	1	1	1	1	1
grp-1	WBGene00001743	K06H7.4	1.53837	0.722155	1.57845	0.621662			17.1357	20.1139	19.8379	20.5351	20.959	20.2085	NA	1	1	2	2	2
lin-36	WBGene00003021	F44B9.6	1.28503	1.06253	2.26094	0.62128			19.0675	17.5666	17.6501	18.8864	19.9005	19.3524	1	NA	NA	NA	1	2
tag-163	WBGene00006508	M01E11.7b	1.05177	2.2009	5.25017	0.618566			21.2591	21.56	21.3344	22.6027	22.6271	22.079	2	2	3	2	3	4
Y79H2A.3c	WBGene00013580	Y79H2A.3c	1.18733	1.32174	2.82323	0.618223			17.7122	17.0796	18.385	18.6257	18.8502	19.2629	NA	NA	NA	NA	1	1
gst-20	WBGene00001768	Y48E1B.10	1.11617	1.66161	3.64869	0.618064			22.0627	22.4409	22.4222	22.9093	23.8723	23.4927	2	3	2	5	5	6
pch-2	WBGene00008641	F10B5.5	1.13123	1.56902	3.41206	0.617641			20.2507	21.0266	21.1428	21.5851	22.1484	22.0803	1	3	2	5	5	5
Y59A8B.10a	WBGene00013347	Y59A8B.10a	0.993633	3.04628	8.853	0.616307			26.644	26.7773	26.8452	27.6353	27.6734	27.9387	14	23	27	28	30	32
lmp-1	WBGene00003053	C03B1.12	1.0553	2.08527	4.87039	0.614734			21.7812	22.0724	22.2376	22.9059	22.9242	23.427	2	3	2	3	4	5
C50D2.8	WBGene00016811	C50D2.8	1.40613	0.827518	1.78532	0.614674			17.6865	18.0169	20.1345	19.9848	19.7263	20.3452	NA	NA	2	2	2	1
duo-3	WBGene00001112	Y106G6H.12b	0.999	2.86061	7.91546	0.614312			20.2638	20.4364	20.3453	21.5772	21.2602	21.2051	2	3	2	3	3	2
fbxa-57	WBGene00016224	C29F9.10	1.60167	0.653328	1.44427	0.613905			19.6292	19.3781	17.782	18.646	21.6141	21.3342	NA	NA	NA	NA	1	1
dhs-13	WBGene00000976	F36H9.3	1.1682	1.3379	2.85998	0.612115			24.0403	25.3709	24.8306	25.6518	26.0709	26.0237	8	12	9	13	12	13
ntl-4	WBGene00003827	C49H3.5c	1.33607	0.909777	1.94906	0.611334			24.3416	22.6717	22.1113	24.4339	24.1021	24.5968	5	6	5	11	9	12
ruvb-2	WBGene00020687	T22D1.10	1.09263	1.70716	3.76872	0.610436			23.3265	24.2492	23.5807	24.7558	24.6886	24.9899	6	10	8	10	13	11
H20J04.9	WBGene00044310	H20J04.9	1.3836	0.837245	1.80456	0.610397			20.2603	17.8333	19.9416	20.5498	20.807	20.8292	1	NA	1	1	1	1
prdx-2	WBGene00006434	F09E5.15a	1.04503	2.10205	4.92415	0.610336			27.5288	28.2328	27.9665	28.8511	28.9784	29.0337	12	20	22	22	21	25
cct-7	WBGene00020391	T10B5.5a	1.19783	1.20116	2.55565	0.608439			23.0356	24.3312	23.0036	24.3196	24.8563	24.788	4	13	6	16	15	15
C06E1.9	WBGene00015524	C06E1.9	1.2168	1.1377	2.41916	0.607494			18.3906	19.8959	19.8966	20.677	20.57	20.5865	NA	1	1	2	3	3
aco-1	WBGene00000040	ZK455.1	1.41957	0.774452	1.68082	0.605471			19.7488	20.1183	17.4315	20.6485	20.3742	20.5346	1	1	NA	1	2	2
csnk-1	WBGene00013709	Y106G6E.6	1.4767	0.713144	1.56086	0.6037			17.4678	20.4632	20.0088	21.1134	20.5996	20.6569	NA	1	NA	1	2	1
Y57G11C.3b	WBGene00013301	Y57G11C.3b	1.05807	1.83254	4.11226	0.602099			23.2081	23.9424	23.8416	24.5128	24.7413	24.9122	4	6	7	7	8	7
Y75B8A.6	WBGene00013543	Y75B8A.6	1.62807	0.6022	1.34467	0.600595			17.9797	17.4288	20.6357	18.9183	20.928	21.0821	NA	NA	1	NA	2	2
T25G3.4	WBGene00012031	T25G3.4	0.956367	3.28021	10.1796	0.599998			27.7816	27.9645	27.9473	28.7138	28.9631	28.8856	37	50	45	59	64	59
R07E4.5	WBGene00019938	R07E4.5	1.43563	0.733448	1.60052	0.598934			17.7662	20.3306	20.5348	21.1497	21.0016	20.7872	NA	1	1	2	2	3
hil-5	WBGene00001856	B0414.3	1.36183	0.814063	1.75876	0.598788			17.1019	19.4022	19.2832	20.3174	19.9337	19.6217	NA	1	NA	2	1	1
Y55F3BR.1	WBGene00021938	Y55F3BR.1	1.0474	1.86406	4.20186	0.598764			19.8026	20.3474	20.3053	20.9362	21.5372	21.1241	NA	1	1	3	4	4
rbd-1	WBGene00004315	T23F6.4a	1.74717	0.543551	1.23011	0.598276			17.6198	21.9544	21.7705	22.415	22.1716	21.9996	NA	3	3	5	5	6
mut-7	WBGene00003504	ZK1098.8	1.22973	1.0382	2.21045	0.598025			18.9234	18.5849	20.3639	20.4086	20.7398	20.413	NA	NA	1	2	3	4
Y38F2AR.9	WBGene00021427	Y38F2AR.9	2.0113	0.463861	1.07306	0.596054			23.9972	24.0333	18.4069	24.0359	24.0085	24.4269	1	1	NA	1	2	2
hpo-11	WBGene00010427	H37N21.1	1.1984	1.10337	2.34647	0.596004			20.703	22.2626	22.1112	23.1259	22.8091	22.737	2	7	4	4	7	4
nop-1	WBGene00017774	F25B5.2a	1.30977	0.869465	1.86852	0.595087			18.3529	20.2486	20.4559	21.2223	21.186	20.5784	NA	2	2	1	2	2
H28G03.2a	WBGene00019250	H28G03.2a	1.05037	1.73104	3.83261	0.592069			22.9367	23.3045	23.4795	23.8533	24.581	24.4375	6	8	9	9	9	10
F43D9.1	WBGene00009653	F43D9.1	1.3988	0.74329	1.61977	0.591814			20.7049	21.6242	18.8724	21.5659	22.3996	21.4324	1	3	NA	3	5	4
dnj-19	WBGene00001037	T05C3.5	0.939233	3.35919	10.6679	0.591441			26.3645	26.4464	26.5045	27.2877	27.5333	27.3121	20	26	23	35	35	33
drsh-1	WBGene00009163	F26E4.10b	1.13163	1.28353	2.73719	0.591417			19.0493	18.8244	18.139	19.6445	20.4004	19.3627	NA	1	NA	2	1	1
hsp-3	WBGene00002007	C15H9.6a	0.9081	4.43752	20.0505	0.587656			29.2231	29.3619	29.322	30.2475	30.196	30.1878	64	71	70	85	86	79
ZK858.6b	WBGene00014119	ZK858.6b	1.04133	1.72367	3.81283	0.587291			22.127	21.9807	22.1386	22.5905	23.335	23.4448	2	3	4	3	5	5
F19B6.1a	WBGene00008948	F19B6.1a	1.00123	2.07824	4.84803	0.586709			24.736	25.182	24.765	25.6091	26.1031	25.9745	7	12	10	18	25	18
cul-1	WBGene00000836	D2045.6	0.946533	2.89233	8.06896	0.585253			25.2002	25.4556	25.4381	26.1457	26.3741	26.4137	13	21	16	30	34	33
nono-1	WBGene00017778	F25B5.7d	1.0531	1.60692	3.50776	0.584984			22.885	23.6646	23.8006	24.3332	24.5201	24.6562	5	4	7	8	10	9
rsd-2	WBGene00004681	F52G2.2b	0.972333	2.3947	5.93927	0.584436			21.7974	22.0705	22.0883	22.6912	23.0678	23.1142	3	5	4	8	4	4
gln-6	WBGene00001607	C28D4.3	1.1318	1.21138	2.5779	0.583691			21.9401	23.4125	22.9307	23.879	24.0205	23.7792	1	10	4	10	8	10
fbxc-50	WBGene00015912	C17F4.5	1.02653	1.77486	3.95174	0.583335			17.9629	17.6262	17.7937	18.7317	18.4553	19.2754	NA	NA	NA	NA	1	2
K11G12.6a	WBGene00019657	K11G12.6a	1.1715	1.07783	2.29285	0.582565			18.2185	19.5953	19.826	20.357	20.234	20.5633	NA	1	1	2	1	1
air-1	WBGene00000098	K07C11.2	0.9279	3.22013	9.82231	0.581949			22.618	22.3678	22.5473	23.535	23.3342	23.4476	1	1	2	3	5	5
ccdc-47	WBGene00014204	ZK1058.4	0.948333	2.72482	7.28755	0.581753			24.2249	23.8206	24.1287	24.9769	24.9467	25.0956	8	8	7	10	8	11
emb-8	WBGene00001262	K10D2.6	1.1963	1.00831	2.14888	0.581657			19.5218	19.1429	17.8757	19.5492	20.2296	20.3505	1	1	NA	2	2	2
mcm-6	WBGene00003158	ZK632.1a	0.925067	3.26773	10.1044	0.581236			25.7729	25.8938	25.601	26.7466	26.6319	26.6644	20	21	21	27	28	28
qars-1	WBGene00001336	Y41E3.4a	1.00323	1.92261	4.37188	0.58008			26.7132	27.2071	26.9682	27.6105	28.0975	28.1902	30	39	34	48	59	59
Y57A10A.31	WBGene00013270	Y57A10A.31	1.1648	1.07641	2.28989	0.579886			18.5561	18.5181	18.0005	18.5786	20.0998	19.8907	NA	NA	NA	NA	2	2
vit-5	WBGene00006929	C04F6.1	0.980033	2.0813	4.85775	0.575899			28.7888	29.3296	29.0804	29.8615	29.9863	30.2911	47	70	60	75	85	84
rpn-5	WBGene00004461	F10G7.8	0.982567	2.04552	4.74485	0.575583			24.1644	23.7476	23.8686	24.6877	24.8063	25.2343	4	4	3	9	10	11
cul-2	WBGene00000837	ZK520.4d	1.53703	0.583036	1.30729	0.574434			17.5971	20.8372	21.3184	21.2446	21.4266	21.6926	NA	2	1	4	3	3
W09C3.4	WBGene00021112	W09C3.4	1.24197	0.86813	1.86586	0.573491			18.1783	16.8943	16.3272	17.6453	18.5667	18.9137	NA	NA	NA	NA	1	1
his-15	WBGene00001889	ZK131.9	1.28383	0.801114	1.73324	0.572957			18.6032	20.9248	20.5699	21.563	21.3841	21.0023	NA	2	2	2	2	3
mpk-1	WBGene00003401	F43C1.2a	1.35457	0.715142	1.56476	0.572593			18.2304	20.7225	20.5452	21.1993	21.7422	20.6203	NA	1	1	1	2	2
exos-1	WBGene00012966	Y48A6B.5	1.1331	1.09899	2.33724	0.570888			17.752	19.3237	18.9459	19.6032	19.8789	19.9388	NA	1	1	1	1	1
ccr-4	WBGene00000376	ZC518.3c	0.9542	2.26278	5.46275	0.569783			23.0899	23.5822	23.2276	24.2084	24.1174	24.4365	7	9	5	10	11	14
F20D6.11	WBGene00017640	F20D6.11	1.24857	0.837729	1.80552	0.569725			17.7628	19.8383	17.7945	19.8142	19.5506	19.7765	NA	1	NA	2	1	2
R151.2b	WBGene00020107	R151.2b	1.07007	1.30959	2.79573	0.568353			20.9187	21.772	21.0408	21.8042	22.7468	22.3907	2	4	4	4	5	4
C18B12.4	WBGene00007666	C18B12.4	1.30217	0.754516	1.64174	0.567848			17.3362	18.116	18.6742	17.9697	19.8955	20.1677	NA	NA	NA	NA	1	1
taf-4	WBGene00006385	R119.6	1.2109	0.89016	1.90979	0.567419			19.0393	19.6329	17.6257	19.842	20.4037	19.6849	NA	1	NA	1	1	2
eef-2	WBGene00001167	F25H5.4a	0.933733	2.48485	6.2843	0.566386			29.6445	29.9096	29.45	30.6522	30.4712	30.6819	84	94	84	106	111	111
R02F11.4	WBGene00019842	R02F11.4	1.22717	0.854491	1.83875	0.566195			18.7213	18.3665	16.5684	19.0544	19.1785	19.1048	NA	NA	NA	1	1	1
Y37A1B.5b	WBGene00012538	Y37A1B.5b	1.49343	0.584809	1.31075	0.565829			17.2916	21.2044	19.1733	21.009	20.6017	20.5389	NA	1	NA	1	1	1
tbb-4	WBGene00006538	B0272.1	1.2964	0.751057	1.63497	0.565392			18.0838	20.0684	17.5302	20.2206	19.7521	19.5989	NA	NA	NA	1	1	1
mccc-1	WBGene00009319	F32B6.2	1.0072	1.63423	3.57771	0.56536			24.6161	25.523	24.7631	25.9972	25.9419	25.9847	13	18	13	19	19	17
cdk-2	WBGene00019362	K03E5.3	1.09237	1.17424	2.49741	0.563831			18.1854	18.9371	19.6662	19.8829	20.1974	19.9855	NA	1	NA	1	3	1
arx-7	WBGene00000205	M01B12.3	1.38223	0.656607	1.45065	0.563525			20.0514	21.2157	18.1395	20.5475	21.5871	21.4187	1	2	NA	3	3	3
ZK1320.9	WBGene00014258	ZK1320.9	0.913833	2.7734	7.5069	0.563492			25.5825	25.4497	25.3896	26.5859	26.2161	26.3613	13	21	16	26	22	21
mdt-28	WBGene00007024	W01A8.1b	0.925	2.53565	6.48611	0.563127			25.5203	25.9743	25.6847	26.6044	26.5942	26.7557	17	20	19	24	27	28
mcm-10	WBGene00012935	Y47D3A.28	1.0427	1.3824	2.96235	0.563018			21.1731	20.8849	21.0481	22.4899	22.345	21.3993	2	1	2	4	4	4
F20D12.2	WBGene00017642	F20D12.2	1.30077	0.734457	1.60249	0.562685			18.4054	21.0115	18.8371	20.7416	20.8662	20.5485	NA	1	NA	2	3	2
chn-1	WBGene00000500	T09B4.10	1.61063	0.51786	1.17971	0.56212			16.8699	20.3674	21.1834	21.618	20.4602	21.1744	NA	1	2	1	2	2
vit-4	WBGene00006928	F59D8.2	0.989033	1.71805	3.79776	0.561815			32.2005	32.944	32.5401	33.2672	33.6237	33.7608	289	391	332	419	430	411
hsp-70	WBGene00002026	C12C8.1	0.920533	2.56961	6.62406	0.561654			26.9118	27.2358	27.1715	27.8397	28.0733	28.1677	2	2	2	2	2	2
R12E2.13	WBGene00020038	R12E2.13	0.890167	3.29985	10.299	0.561112			23.5851	23.4526	23.7129	24.5267	24.3892	24.5052	4	4	4	4	5	4
vit-6	WBGene00006930	K07H8.6a	0.945733	2.13204	5.02135	0.560155			32.7162	33.2385	32.9813	33.7658	33.8646	34.1428	304	403	350	417	430	436
D2030.2a	WBGene00008412	D2030.2a	0.986533	1.69937	3.748	0.559508			23.2251	22.6829	23.3793	23.7719	24.1951	24.2799	5	7	6	12	11	12
gspd-1	WBGene00007108	B0035.5	0.929867	2.3378	5.72972	0.55939			26.5344	26.8906	26.8593	27.4681	27.7505	27.8553	25	31	29	38	36	39
cyc-1	WBGene00000869	C54G4.8	0.916967	2.50491	6.36334	0.557731			23.0188	23.2541	23.039	23.7752	24.1441	24.1435	4	6	5	4	7	6
F29B9.11	WBGene00017925	F29B9.11	2.16487	0.380193	0.904919	0.556188			18.1748	24.9806	25.6671	24.9862	25.0953	25.2356	2	2	3	3	5	5
Y92H12BR.3a	WBGene00022369	Y92H12BR.3a	0.907833	2.62237	6.84342	0.556046			24.1264	24.3527	24.2707	25.0388	25.0468	25.3877	6	7	9	14	15	15
T28D6.6a	WBGene00012126	T28D6.6a	1.05787	1.22776	2.6137	0.555387			20.0356	18.8469	19.9509	20.412	20.752	20.843	1	NA	1	2	2	2
him-10	WBGene00001869	R12B2.4	1.19613	0.846602	1.8231	0.554768			19.1953	19.8359	17.6312	20.0011	20.1314	20.1183	1	NA	NA	2	3	2
dpy-22	WBGene00001081	F47A4.2	1.04057	1.29805	2.76975	0.554765			17.939	18.117	17.2346	18.5929	19.3247	18.4947	NA	1	NA	1	1	1
M04B2.4	WBGene00010847	M04B2.4	0.9861	1.6204	3.54218	0.554491			21.7038	20.9358	21.3015	22.1808	22.6319	22.0867	2	2	2	8	6	6
hda-1	WBGene00001834	C53A5.3	0.911633	2.43286	6.08331	0.552553			24.9908	25.3652	24.9305	25.9374	25.9511	26.1329	9	14	10	20	22	21
Y39E4B.10	WBGene00012719	Y39E4B.10	1.12257	0.984022	2.09919	0.551695			18.7139	19.2219	17.5478	19.4493	20.0173	19.3847	NA	NA	NA	1	1	1
copb-2	WBGene00009542	F38E11.5	0.938533	2.00405	4.61648	0.551009			25.8319	26.4748	25.9306	26.9775	26.9837	27.0917	21	33	27	30	36	38
npp-3	WBGene00003789	K12D12.2	1.12263	0.973434	2.07763	0.550218			18.201	19.0734	19.8984	20.1995	20.5645	19.7767	NA	2	2	3	3	2
ccf-1	WBGene00000369	Y56A3A.20	1.36743	0.622157	1.38356	0.549535		+	21.3435	18.3169	21.1639	21.4138	21.8478	21.665	2	NA	1	2	4	4
K05C4.7	WBGene00010583	K05C4.7	1.26543	0.717342	1.56905	0.548639			19.8253	22.0054	20.5524	21.0885	22.4377	22.6532	2	2	2	5	6	5
hda-6	WBGene00018319	F41H10.6a	1.26607	0.710053	1.55483	0.547067			18.4527	18.5264	16.1933	18.4521	19.3735	19.145	NA	NA	NA	NA	1	1
nxf-1	WBGene00003834	C15H11.3b	0.928067	2.03847	4.72286	0.547046			23.2973	23.807	23.6498	24.2826	24.7172	24.5385	3	5	5	10	12	11
lsm-5	WBGene00003079	F28F8.3	1.3793	0.604991	1.35011	0.54699			19.171	22.341	22.0571	22.7599	22.3084	22.6387	NA	2	2	4	4	4
sec-23	WBGene00004754	Y113G7A.3	0.9891	1.45295	3.12836	0.544607			21.7584	22.5065	22.4294	23.0878	22.9443	23.6295	2	3	4	5	8	7
sqd-1	WBGene00022235	Y73B6BL.6a	0.944233	1.80107	4.02414	0.544339			27.0047	26.773	27.4407	27.8485	27.9312	28.2714	21	21	27	27	29	32
ugt-23	WBGene00007650	C17G1.3a	1.11197	0.953055	2.03627	0.543462			20.6708	22.1242	22.2993	22.6419	23.1666	22.6217	1	4	4	6	6	5
acly-2	WBGene00007150	B0365.1	0.963433	1.58836	3.4607	0.541744			25.5589	25.719	25.1755	25.9956	26.6413	26.7068	15	17	16	27	27	30
jmjd-2	WBGene00012982	Y48B6A.11	0.883967	2.58012	6.66726	0.541453			20.6235	20.6077	21.0033	21.6446	21.5721	21.6697	2	1	2	4	4	3
W07E6.2	WBGene00021074	W07E6.2	0.880467	2.60169	6.7567	0.540061			19.7563	19.8909	19.6705	20.5798	20.5037	20.8756	1	1	1	1	1	2
odr-8	WBGene00018160	F38A5.1b	0.921967	1.94796	4.44698	0.540007			21.3301	21.1624	21.405	21.9119	22.1713	22.5802	1	3	2	2	3	3
aap-1	WBGene00000001	Y110A7A.10	0.929467	1.81657	4.06738	0.537725			22.9221	23.4563	22.9856	24.1187	23.756	24.2777	3	6	8	10	9	9
ile-1	WBGene00002070	K07A1.8	0.8715	2.70038	7.17938	0.537502			24.0752	23.9318	24.2926	24.8502	25.018	25.0459	8	8	7	13	12	12
set-2	WBGene00004782	C26E6.9a	1.22147	0.717644	1.56965	0.536159			18.2398	20.4731	20.4218	20.6476	21.4368	20.7147	NA	1	1	4	3	3
exos-2	WBGene00022232	Y73B6BL.3	1.06787	1.00646	2.14509	0.534516			18.0815	19.4957	19.5788	19.9522	20.0843	20.3231	NA	1	1	1	1	1
rpn-8	WBGene00004464	R12E2.3	0.861567	2.77916	7.53328	0.533687			24.9873	25.3613	25.1682	25.9766	26.02	26.1049	7	13	7	20	19	21
mac-1	WBGene00003119	Y48C3A.7	1.35783	0.579044	1.2995	0.533553			18.7251	21.9286	21.7743	22.0966	22.1149	22.29	NA	4	3	5	4	5
spg-7	WBGene00004978	Y47G6A.10	0.858767	2.80434	7.64962	0.532647			20.2473	20.3565	20.1523	20.9302	21.255	21.1472	2	1	1	3	2	2
cbp-1	WBGene00000366	R10E11.1c	0.874867	2.43905	6.10697	0.532398			23.3543	23.5022	23.0784	24.2167	24.2923	24.0505	5	9	6	16	13	12
cdk-12	WBGene00007135	B0285.1a	1.0139	1.17495	2.49895	0.532027			18.6337	19.7651	19.7392	20.2583	20.2096	20.7118	NA	1	1	2	3	2
C05C8.7	WBGene00015464	C05C8.7	1.3788	0.558804	1.25996	0.531468			17.5422	20.9403	20.577	21.3036	21.2079	20.6844	1	2	2	2	3	1
bca-2	WBGene00013805	Y116A8C.28c	1.5036	0.491127	1.12705	0.530538			17.6915	21.3201	21.9529	21.6335	21.7654	22.0764	NA	1	1	1	2	2
cpt-1	WBGene00012907	Y46G5A.17	0.918733	1.75428	3.89549	0.529272			22.2909	21.6431	21.928	22.6327	22.8577	23.1278	3	3	4	4	5	7
hbl-1	WBGene00001824	F13D11.2b	1.35157	0.568022	1.27798	0.528455			19.1898	19.0177	22.2507	21.3212	21.7435	21.4482	NA	1	1	1	1	1
art-1	WBGene00000198	C15F1.6	0.921333	1.71308	3.78449	0.528454			24.7175	23.9654	24.6051	25.2199	25.3962	25.4359	5	8	8	10	10	10
R01H10.7	WBGene00010975	R01H10.7	0.992033	1.2319	2.6228	0.528173			22.2501	21.6244	21.4304	23.3302	22.5214	22.4294	2	3	2	6	5	5
M4.1a	WBGene00019766	M4.1a	1.39897	0.53604	1.21539	0.527705			18.1073	21.6219	21.4635	21.6462	22.0039	21.7395	NA	3	4	1	4	4
dhs-6	WBGene00000970	C17G10.8	1.09893	0.87263	1.87482	0.526775			18.3407	19.9522	20.0166	20.1328	20.8235	20.65	NA	1	1	2	2	3
ZK370.8	WBGene00022722	ZK370.8	0.938433	1.53578	3.32939	0.526658			21.5381	21.3807	21.5096	21.8696	22.5945	22.7796	4	5	5	4	5	5
sft-4	WBGene00004788	C54H2.5	0.905067	1.83808	4.12791	0.526429			21.5919	21.2037	21.5536	22.0082	22.6195	22.4367	1	1	1	2	1	2
gfat-1	WBGene00008546	F07A11.2b	0.871367	2.30402	5.60821	0.526387			24.8581	24.368	24.4762	25.3702	25.5241	25.4221	11	14	15	18	19	17
F01G4.6a	WBGene00008505	F01G4.6a	0.8941	1.96455	4.49663	0.526301			26.6348	26.2616	26.5476	27.0562	27.5988	27.4713	19	21	16	19	20	19
F46B6.5c	WBGene00009770	F46B6.5c	1.3845	0.53791	1.21906	0.525285			18.1291	17.0974	19.5012	20.5638	17.8331	20.4843	NA	NA	NA	1	2	1
erv-46	WBGene00010725	K09E9.2	1.16587	0.74242	1.61806	0.525039			17.2555	17.4552	19.2764	18.5114	19.468	19.5053	NA	NA	NA	NA	1	1
rpb-2	WBGene00016140	C26E6.4	0.889567	1.97434	4.52613	0.524342			23.1248	22.79	22.7831	23.5769	23.685	24.1047	4	8	5	12	12	13
nra-2	WBGene00011488	T05F1.1a	0.9341	1.53015	3.31551	0.524264			21.9622	21.1177	21.5907	22.2115	22.6108	22.6506	2	1	2	3	5	6
lpd-9	WBGene00003065	T21C9.5a	0.860233	2.37626	5.87067	0.522452			22.0198	22.2812	22.1653	22.771	23.0894	23.1866	3	3	2	3	6	5
H34C03.2a	WBGene00019259	H34C03.2a	0.809433	4.09276	16.4081	0.52244			25.9433	25.8898	25.7778	26.6652	26.6839	26.6901	16	25	19	35	33	35
C44E4.4	WBGene00016653	C44E4.4	0.832633	2.97766	8.49532	0.521044			26.6418	26.7632	26.7557	27.7321	27.4731	27.4534	23	24	26	32	31	32
rfc-2	WBGene00004338	F58F6.4	0.8734	2.06838	4.81675	0.519471			23.7812	23.7011	23.905	24.3265	24.8448	24.8362	7	6	8	8	7	9
csn-3	WBGene00000815	Y38C1AA.2	1.4624	0.482936	1.11086	0.519234			18.0036	20.9079	21.9294	20.5595	22.3061	22.3625	NA	2	1	3	3	3
C23H3.3a	WBGene00016019	C23H3.3a	0.931933	1.44475	3.10882	0.517807			20.7578	21.2266	21.2044	21.6461	22.4985	21.84	1	2	2	3	4	3
rpn-6.1	WBGene00004462	F57B9.10b	0.925967	1.48724	3.21074	0.517764			24.8426	25.7956	25.1247	26.1493	26.1001	26.2914	11	16	12	13	22	19
cpsf-3	WBGene00013460	Y67H2A.1	1.13537	0.746799	1.62663	0.516549			19.0598	21.2192	20.9699	21.2892	21.5634	21.8024	NA	2	2	2	3	3
F30F8.1	WBGene00009270	F30F8.1	1.16727	0.697066	1.52949	0.515766			17.8316	19.777	20.3259	20.3627	20.3979	20.6757	NA	1	1	1	2	1
mig-5	WBGene00003241	T05C12.6c	1.01407	1.02008	2.17308	0.515631			18.5946	19.6543	20.0013	20.0418	20.6779	20.5727	NA	1	1	1	1	1
mel-11	WBGene00003196	C06C3.1a	1.27223	0.584939	1.31101	0.514986			18.2361	21.2392	20.7969	20.8511	21.6158	21.622	NA	4	1	2	4	3
tag-173	WBGene00006518	F27D4.5	0.8727	1.91927	4.36205	0.513333			20.5993	20.5652	20.5318	21.0483	21.7035	21.5626	1	1	1	2	2	2
epg-6	WBGene00012641	Y39A1A.1c	0.962667	1.184	2.51848	0.511447			20.0329	19.9251	19.9621	20.213	21.0896	21.5055	1	2	2	3	3	4
F44E2.8	WBGene00018421	F44E2.8	0.8418	2.34694	5.76295	0.5114			24.9348	24.5405	24.8093	25.7394	25.4376	25.633	10	9	9	11	12	11
ZC262.5	WBGene00022582	ZC262.5	1.14393	0.703438	1.54192	0.510254			18.2292	16.9021	19.3047	19.803	18.9627	19.1021	NA	NA	2	1	2	2
T24H7.3	WBGene00020782	T24H7.3	1.21217	0.618508	1.37645	0.509175			20.1737	22.7048	22.735	23.1132	23.4742	22.6626	NA	7	3	6	7	4
unc-26	WBGene00006763	JC8.10a	0.919633	1.38283	2.96336	0.507991			22.5003	22.5959	22.4935	23.0739	24.0614	23.2133	2	4	4	3	3	4
mex-5	WBGene00003230	W02A2.7	0.851067	2.07313	4.8318	0.507754			24.2968	23.806	24.1062	25.0917	24.7356	24.9349	9	7	7	12	11	12
copa-1	WBGene00022119	Y71F9AL.17	0.871	1.80103	4.02403	0.507443			24.4068	23.8776	24.1021	24.7161	25.0436	25.2398	10	9	7	15	22	19
Y57G11C.9a	WBGene00013307	Y57G11C.9a	0.859767	1.91724	4.35609	0.506528			23.3365	23.0539	23.4985	23.859	24.2975	24.3117	5	7	7	9	7	7
ife-4	WBGene00002062	C05D9.5	1.0026	0.969421	2.06947	0.505222			18.0788	18.8888	19.6927	19.8223	19.7002	20.1456	NA	NA	NA	NA	1	1
tbb-1	WBGene00006536	K01G5.7	0.8443	2.03953	4.72614	0.502965			29.6468	30.2162	29.9051	30.8576	30.8128	30.6306	53	72	64	79	77	75
W06B4.1	WBGene00021056	W06B4.1	1.18503	0.621628	1.38253	0.50274			19.246	22.026	21.5304	22.1626	22.0346	22.1603	NA	2	2	2	4	4
bra-2	WBGene00017757	F23H11.1	0.808433	2.72803	7.30187	0.501909			23.3182	23.0528	23.1816	23.9876	24.1335	23.8568	4	5	5	6	8	7
ntl-9	WBGene00016139	C26E6.3	0.8526	1.8865	4.26646	0.501577			21.0626	20.5373	20.9607	21.4881	21.8961	21.7342	3	2	2	3	3	2
C42D4.1	WBGene00016594	C42D4.1	0.854367	1.82487	4.09067	0.499964			26.673	26.014	26.5959	27.2445	27.3027	27.2988	9	9	10	15	14	12
C35E7.6	WBGene00016458	C35E7.6	1.02397	0.866598	1.86281	0.499572			19.3549	18.0862	19.5161	19.7153	20.6345	19.6793	NA	NA	1	2	1	1
cpt-2	WBGene00011122	R07H5.2a	0.829667	2.16866	5.14204	0.499393			20.9878	21.4165	21.3286	21.9133	22.0679	22.2407	1	4	3	3	3	5
trap-2	WBGene00020216	T04G9.5	0.827867	2.18726	5.20419	0.498992			23.4278	23.6699	23.7418	24.4874	24.2005	24.6352	2	2	2	3	5	4
stau-1	WBGene00018857	F55A4.5	1.25757	0.544775	1.23251	0.498969			17.9062	21.1314	20.7224	21.2509	21.3302	20.9516	NA	1	2	2	4	2
rbx-1	WBGene00004320	ZK287.5	0.8879	1.46724	3.16256	0.498609			23.6852	23.2407	23.182	24.6956	23.9091	24.1669	5	5	4	5	4	5
atln-1	WBGene00021868	Y54G2A.2b	1.36073	0.480669	1.10638	0.498456			18.0127	21.313	21.8201	21.1768	22.1791	21.8721	NA	3	1	3	7	8
pph-5	WBGene00012665	Y39B6A.2a	1.00917	0.88112	1.89174	0.496281			18.3821	19.6247	18.4758	20.0608	20.3054	19.1439	NA	NA	1	1	1	NA
alh-9	WBGene00000115	F01F1.6	0.8231	2.18011	5.18022	0.496174			22.7005	23.0103	23.0322	23.6618	23.9677	23.5828	2	5	2	3	5	5
ech-5	WBGene00001154	F56B3.5	1.00743	0.879565	1.88864	0.495438			20.9342	22.7195	21.9835	23.0431	22.982	22.6344	2	3	2	4	3	4
ZK742.4	WBGene00022814	ZK742.4	1.09997	0.695816	1.52706	0.495409			17.3343	18.6321	19.8061	19.5298	19.863	19.6796	NA	NA	1	1	1	1
Y76B12C.6a	WBGene00022300	Y76B12C.6a	0.956833	1.03765	2.20931	0.494976			18.4596	18.6803	18.139	20.0536	18.6587	19.4371	NA	NA	NA	NA	1	1
hsp-1	WBGene00002005	F26D10.3	0.820367	2.1663	5.13419	0.494261			31.3214	31.8464	31.4837	32.4439	32.3159	32.3528	97	113	102	114	125	118
faah-4	WBGene00013232	Y56A3A.12b	1.00693	0.870267	1.87011	0.493974			20.0011	19.2385	18.4878	19.8127	20.8604	20.0751	1	NA	NA	1	2	3
daf-11	WBGene00000907	B0240.3	1.49953	0.414275	0.973943	0.493324			18.5345	19.3553	17.8937	17.1347	21.6548	21.4926	NA	NA	NA	NA	1	1
pie-1	WBGene00004027	Y49E10.14a	0.858667	1.59044	3.46597	0.491301		+	22.749	21.9701	22.3659	23.0145	23.3491	23.2974	2	2	2	3	3	2
chin-1	WBGene00015267	BE0003N10.2	0.834467	1.84569	4.14947	0.490545			24.5958	24.2838	24.2519	24.875	25.3951	25.3648	8	12	7	15	18	16
cid-1	WBGene00019629	K10D2.3	0.834567	1.768	3.93294	0.487424			23.5692	22.8673	23.2206	24.1796	23.9873	23.9939	8	6	7	9	10	8
F54D5.5a	WBGene00010051	F54D5.5a	0.777333	2.80137	7.63582	0.485287			23.0943	22.8292	22.9887	23.8412	23.7838	23.6192	2	2	2	3	4	4
Y39G10AR.8	WBGene00021466	Y39G10AR.8	0.802	2.18126	5.18407	0.484679			22.4687	22.7588	22.6422	23.4239	23.2012	23.6506	5	7	5	7	6	8
Y39E4A.3a	WBGene00012713	Y39E4A.3a	1.22753	0.522325	1.18848	0.484643			18.327	21.5462	21.2463	21.552	21.4352	21.8149	NA	4	2	6	2	2
nuo-1	WBGene00003831	C09H10.3	0.815833	1.93438	4.40662	0.484134			25.2128	25.4564	25.075	25.899	25.9339	26.3588	10	14	11	15	16	17
cdkr-3	WBGene00013765	Y113G7B.16	1.2193	0.526714	1.1971	0.484128			19.3565	18.6581	18.6208	18.4718	19.9321	21.8894	1	2	2	2	1	1
Y48G10A.2a	WBGene00013019	Y48G10A.2a	0.8854	1.24601	2.65385	0.482868			21.8608	22.2903	22.1495	22.4957	22.905	23.5561	4	5	4	4	4	3
gsy-1	WBGene00001793	Y46G5A.31	0.769467	2.92403	8.22504	0.482863			24.9613	24.7563	24.6836	25.6236	25.4851	25.6009	10	12	13	16	19	15
Y32H12A.2a	WBGene00021311	Y32H12A.2a	0.817467	1.8737	4.22952	0.482772			24.2786	23.9135	24.2315	24.9389	24.6996	25.2375	5	13	12	13	16	14
apy-1	WBGene00017244	F08C6.6	1.03583	0.734443	1.60246	0.482591			18.3628	18.8721	17.6487	19.4469	18.3417	20.2025	NA	NA	NA	1	1	1
rad-23	WBGene00013924	ZK20.3	0.810633	1.93516	4.40894	0.481413			21.6779	22.2294	21.6987	22.6682	22.745	22.6247	2	2	2	2	3	3
djr-1.1	WBGene00015184	B0432.2	0.8209	1.78964	3.99245	0.481293			25.7231	26.3405	26.0528	26.6558	26.9473	26.976	13	15	14	17	18	16
F28C6.8a	WBGene00009207	F28C6.8a	0.9016	1.11606	2.37325	0.4796			20.2216	19.6898	20.6691	21.575	20.7141	20.9962	2	2	1	2	2	2
spin-4	WBGene00013739	Y111B2A.19	0.8137	1.82095	4.07968	0.478801			19.0839	18.4307	18.745	19.6461	19.4383	19.6163	1	NA	NA	NA	1	1
acs-22	WBGene00017012	D1009.1a	1.11937	0.594117	1.32891	0.477888			19.0449	16.9506	19.1003	18.7209	20.3016	19.4314	NA	NA	1	NA	1	1
pmr-1	WBGene00004063	ZK256.1b	0.9872	0.802276	1.73552	0.47718			18.0059	18.9516	19.6813	20.3443	19.3214	19.9347	NA	1	1	1	1	1
F26F4.12	WBGene00017831	F26F4.12	0.8943	1.10262	2.3449	0.475342			19.22	18.289	19.4723	19.6826	20.1183	19.8633	NA	NA	1	2	1	2
F34D10.4	WBGene00009374	F34D10.4	1.21137	0.504958	1.15432	0.475154			18.8389	18.2908	16.224	17.6308	19.6113	19.7457	NA	NA	NA	NA	1	1
F40G9.17	WBGene00185078	F40G9.17	0.8493	1.34146	2.86811	0.472853			21.0909	22.1067	21.5228	22.3601	22.4391	22.4691	1	3	3	4	3	3
Y53F4B.13b	WBGene00013160	Y53F4B.13b	0.827667	1.49873	3.23861	0.471454			22.9813	23.0647	22.4205	23.3391	23.7773	23.8331	3	6	2	6	9	10
scpl-4	WBGene00011897	T21C9.12	0.829833	1.4671	3.16222	0.470849			19.4202	19.3753	19.5246	20.6067	19.7614	20.4415	NA	NA	NA	1	1	1
F25H9.6	WBGene00009138	F25H9.6	0.960367	0.822911	1.77622	0.470611			21.5527	21.9688	21.8593	21.8368	22.7658	23.6593	2	4	4	3	2	3
uso-1	WBGene00010713	K09B11.9b	0.800833	1.76842	3.93409	0.470093			20.5818	20.3902	21.0389	21.5071	21.5639	21.3424	2	3	2	4	4	3
efl-1	WBGene00001161	Y102A5C.18	0.787633	1.938	4.41735	0.469303			24.6603	24.3746	24.7335	25.3621	25.1412	25.628	5	7	7	7	7	5
cyn-11	WBGene00000887	T01B7.4	0.922833	0.921841	1.97329	0.469			18.9527	20.3568	20.1597	20.6072	20.5626	21.0679	NA	1	1	2	1	1
let-60	WBGene00002335	ZK792.6	0.995033	0.728734	1.59131	0.468186			19.5639	20.2911	18.1999	20.2988	20.1604	20.5808	NA	1	NA	2	1	1
R04B5.5	WBGene00011003	R04B5.5	0.927933	0.890963	1.91139	0.467361			17.093	18.711	18.1555	18.714	19.0467	18.9826	NA	1	NA	1	1	1
R119.3	WBGene00020089	R119.3	0.8237	1.44524	3.10999	0.466724			24.4355	25.3446	24.9288	25.7875	25.6727	25.7198	8	12	11	13	14	13
lin-9	WBGene00002998	ZK637.7a	0.8078	1.57946	3.43826	0.465606			19.5905	19.7334	19.6224	20.1282	20.902	20.3395	1	2	1	2	3	3
wago-4	WBGene00010263	F58G1.1	0.736	3.00991	8.66174	0.464362			25.4556	25.2018	25.3181	25.9754	26.1025	26.1056	20	17	17	30	28	26
mvk-1	WBGene00021534	Y42G9A.4a	0.8672	1.10262	2.34489	0.463786			21.836	21.7679	21.6065	22.2521	22.229	23.3309	1	4	1	5	6	6
emc-1	WBGene00019209	H17B01.4a	0.8178	1.4377	3.09208	0.463479			21.8519	22.5635	22.1148	23.1106	22.6714	23.2016	3	6	3	5	6	6
F33G12.3	WBGene00018015	F33G12.3	0.9679	0.753061	1.63889	0.462981			17.2213	18.0106	19.1825	18.7989	19.2167	19.3025	NA	NA	NA	1	1	1
T06D8.10	WBGene00011530	T06D8.10	0.9154	0.882519	1.89453	0.461582			18.6624	19.9465	18.6614	19.808	20.4522	19.7563	NA	1	NA	1	2	2
npp-2	WBGene00003788	T01G9.4	1.06727	0.585473	1.31205	0.461334			16.7529	18.5534	18.6647	18.2567	20.0517	18.8644	NA	1	1	NA	1	1
cpsf-4	WBGene00044329	F11A10.8	1.0013	0.672552	1.48171	0.460205			19.5941	21.0126	21.8121	21.8983	22.0816	21.4428	NA	1	1	2	3	3
vdac-1	WBGene00019900	R05G6.7	0.7789	1.79482	4.00681	0.459692			29.0298	28.8056	28.632	29.3529	29.5604	29.8908	29	33	31	34	37	32
Y53C12A.3	WBGene00013139	Y53C12A.3	0.909233	0.886322	1.90212	0.459671			18.4012	17.9711	19.5499	19.7044	19.5103	19.4352	NA	NA	1	2	1	1
cct-1	WBGene00000377	T05C12.7	0.885867	0.968596	2.06779	0.459376			24.0225	25.2926	24.3082	25.0527	25.5743	25.6539	5	22	8	22	24	22
cids-2	WBGene00009451	F36A2.1b	0.798	1.54431	3.35049	0.459102			21.2144	21.7466	21.6529	22.0573	22.652	22.2986	1	4	3	4	5	6
Y43F4B.5a	WBGene00012803	Y43F4B.5a	0.7346	2.72841	7.30356	0.458958			26.4362	26.7323	26.4468	27.3122	27.2848	27.2221	24	29	30	36	39	39
H28O16.1d	WBGene00010419	H28O16.1d	0.768767	1.90656	4.3248	0.458211			30.3185	30.6677	30.4112	30.9964	31.2139	31.4934	76	87	83	100	106	101
apa-2	WBGene00000161	T20B5.1	0.802367	1.4748	3.18072	0.457904			19.4105	20.1744	19.7947	20.3938	20.5761	20.8168	NA	1	1	1	3	2
pccb-1	WBGene00018701	F52E4.1b	0.753167	2.18355	5.19176	0.457833			26.1925	26.6125	26.4498	27.0205	27.2122	27.2816	19	26	21	29	30	27
asna-1	WBGene00014025	ZK637.5	0.796867	1.52614	3.30564	0.45769			20.9772	20.4778	21.2449	21.5266	21.8138	21.7501	1	3	3	3	4	5
fib-1	WBGene00001423	T01C3.7	0.7084	3.89889	14.6527	0.457521			26.2472	26.3983	26.2892	27.0095	27.0543	26.9961	15	19	19	19	19	17
dhp-2	WBGene00000964	C47E12.8	1.01987	0.628915	1.39672	0.457301			17.891	20.3345	19.0657	20.4508	19.8	20.1	NA	1	NA	1	1	NA
nuo-2	WBGene00020417	T10E9.7b	0.7514	2.19775	5.23951	0.45722			25.4112	25.5806	25.819	26.2861	26.2623	26.5166	10	14	13	14	18	18
gfat-2	WBGene00009035	F22B3.4	0.779	1.66555	3.65897	0.454784			23.1547	22.566	22.9647	23.9	23.4749	23.6475	4	6	6	5	7	5
bed-2	WBGene00012943	Y47D3B.9	0.743333	2.20537	5.26528	0.452927			21.0915	21.31	21.0925	21.6672	22.0069	22.0499	2	3	3	2	3	2
sup-26	WBGene00006331	R10E4.2a	0.781033	1.58461	3.45123	0.45243			23.9494	24.2971	24.5478	25.3364	24.9019	24.8991	3	7	4	7	7	7
mrpl-11	WBGene00015133	B0303.15	1.128	0.493272	1.13128	0.451724			18.452	20.0763	17.3986	18.621	19.9299	20.76	NA	1	NA	NA	1	1
W06D11.1	WBGene00012299	W06D11.1	0.7985	1.38969	2.9793	0.451636			20.5186	21.3295	21.0181	21.9393	21.8108	21.5116	1	2	2	2	2	2
gcs-1	WBGene00001527	F37B12.2	0.722267	2.70586	7.2035	0.451342			22.5357	22.5239	22.4573	23.0334	23.3257	23.3246	4	4	4	4	5	5
prmt-3	WBGene00011939	T23B5.1a	0.734167	2.31478	5.6467	0.450404			23.6023	23.6261	23.636	24.169	24.2931	24.6048	7	9	10	11	13	11
Y37D8A.25	WBGene00012560	Y37D8A.25	0.885433	0.875332	1.8802	0.449248			19.2611	17.8083	17.9009	19.1733	19.1737	19.2796	NA	NA	NA	1	1	2
plk-1	WBGene00004042	C14B9.4a	0.6968	3.68778	12.9483	0.448445			24.4604	24.3041	24.4642	25.0908	25.1015	25.1268	10	14	10	14	14	17
atg-2	WBGene00019748	M03A8.2	0.951533	0.694434	1.52436	0.447945			17.4768	18.6414	19.5399	19.7923	19.5518	19.1686	NA	1	NA	NA	2	1
csn-1	WBGene00000813	Y59A8A.1	0.826933	1.11603	2.37318	0.447366			19.6655	20.3037	20.2367	21.3351	20.3654	20.9862	1	2	1	3	4	5
B0250.5	WBGene00007122	B0250.5	0.708467	2.93766	8.29298	0.446861			24.4754	24.2775	24.3172	25.011	24.9988	25.1857	9	11	11	14	16	15
H05C05.1c	WBGene00019157	H05C05.1c	0.763867	1.64951	3.61722	0.446399			24.7424	24.1521	24.7492	25.3048	25.1878	25.4427	6	9	8	13	12	11
alg-1	WBGene00000105	F48F7.1a	0.7058	2.92044	8.20722	0.44502			23.1781	22.9775	22.9295	23.6601	23.7973	23.7451	2	3	3	8	9	8
eif-3.F	WBGene00001229	D2013.7	0.8705	0.865751	1.86113	0.442389			22.2819	23.8638	23.3512	23.9753	24.0207	24.1124	5	6	3	6	6	7
sun-1	WBGene00006311	F57B1.2	0.684233	3.74281	13.3732	0.441109			19.5337	19.6513	19.6772	20.3324	20.3292	20.2533	1	1	1	2	1	1
ZK484.4b	WBGene00022750	ZK484.4b	0.793167	1.24445	2.65042	0.440829			19.559	18.9964	18.6135	20.0043	19.9286	19.6155	1	NA	NA	1	1	1
dve-1	WBGene00022861	ZK1193.5a	1.03953	0.531407	1.20631	0.440154			20.0939	20.2407	17.6004	20.1723	20.3946	20.4867	2	2	NA	1	3	2
Y75B8A.7	WBGene00013544	Y75B8A.7	0.988733	0.591638	1.32407	0.440076			17.3773	19.4105	17.0121	18.8698	18.9188	18.9775	NA	1	1	1	1	1
mif-1	WBGene00003234	Y56A3A.3	0.813533	1.08213	2.30187	0.438936			18.3905	19.4325	19.3493	20.0546	19.8979	19.6604	NA	1	NA	2	1	1
F52C9.3	WBGene00018674	F52C9.3	0.739833	1.76463	3.92372	0.438146			23.386	22.887	23.4278	23.8904	24.1196	23.9103	4	7	6	9	8	9
spt-5	WBGene00005015	K08E4.1	0.6806	3.61582	12.4123	0.437732			24.2116	24.3695	24.2625	24.9567	25.0144	24.9143	9	15	12	17	18	17
K07F5.15b	WBGene00010639	K07F5.15b	1.04787	0.512472	1.16911	0.437287			20.9975	18.0183	19.2631	20.9256	20.1132	20.3837	1	NA	1	1	1	2
cth-1	WBGene00009048	F22B8.6b	0.758933	1.47776	3.18786	0.436653			21.4521	22.128	21.8819	22.314	22.7023	22.7225	2	3	2	3	3	3
ZK1067.3	WBGene00014209	ZK1067.3	0.9689	0.598214	1.3369	0.435512			19.2986	21.4014	20.955	21.0674	22.1879	21.3064	NA	2	1	2	2	1
tofu-6	WBGene00017132	EEED8.1	0.727767	1.87662	4.23793	0.435338			23.4748	23.8599	24.0303	24.6096	24.4998	24.4389	4	8	10	7	11	12
W04B5.5	WBGene00021022	W04B5.5	0.7403	1.67575	3.68568	0.435251			19.5635	19.7344	19.5948	20.2942	20.0806	20.7388	1	NA	1	1	2	2
ima-2	WBGene00002073	F26B1.3	0.6948	2.69155	7.14063	0.434983			26.497	26.4336	26.2756	26.9654	27.212	27.1132	19	22	21	29	30	27
let-721	WBGene00002855	C05D11.12	0.7207	1.99009	4.57386	0.434793			23.3243	23.7248	23.4934	24.0495	24.4186	24.2365	6	7	4	8	9	10
ard-1	WBGene00000181	F01G4.2a	0.773567	1.29132	2.75462	0.434387			19.7645	20.3054	20.1977	20.433	21.2045	20.9508	NA	2	1	2	2	2
puf-9	WBGene00004245	W06B11.2	0.696167	2.516	6.40738	0.432764			21.3779	21.4254	21.2867	21.8732	22.2191	22.0862	3	3	4	4	2	3
R08D7.2	WBGene00011143	R08D7.2	0.853767	0.832321	1.79482	0.432137			18.7183	17.8308	19.4234	19.4078	19.7472	19.3788	NA	NA	1	1	2	2
W03A5.6	WBGene00020970	W03A5.6	0.7943	1.09766	2.33445	0.431626			18.9566	19.6656	19.9741	20.0546	20.3219	20.6027	NA	1	1	2	1	1
frg-1	WBGene00014177	ZK1010.3	0.781867	1.16767	2.48327	0.430815			19.7087	18.8858	18.7027	19.9442	19.764	19.9346	1	1	NA	1	1	1
cif-1	WBGene00019543	K08F11.3	0.7819	1.16732	2.48252	0.430808			22.4661	23.3592	23.1009	23.4579	23.7686	24.0454	2	10	7	8	11	11
dlst-1	WBGene00020950	W02F12.5	0.732833	1.63187	3.57163	0.429768			25.1024	25.743	25.1635	26.0303	26.102	26.0751	6	11	8	12	13	13
Y66H1A.4	WBGene00022046	Y66H1A.4	0.734967	1.59285	3.47205	0.429383			22.9167	22.4266	23.0742	23.5322	23.4026	23.6876	2	3	2	4	3	3
K12H4.4	WBGene00019679	K12H4.4	1.20377	0.389194	0.923231	0.429324			21.966	21.0376	17.6774	21.4495	21.5167	21.3261	2	2	NA	1	3	3
num-1	WBGene00003830	T03D8.1b	0.791	1.06887	2.27415	0.428072			19.8948	19.564	19.4996	21.0948	20.1069	20.1297	1	1	1	1	1	1
idha-1	WBGene00009664	F43G9.1	0.670467	3.27019	10.1192	0.428069			24.4118	24.6109	24.5628	25.1433	25.2341	25.2195	9	11	9	13	13	14
cgp-1	WBGene00000480	Y38C9A.2	0.680667	2.76748	7.47987	0.427823			24.0552	23.9143	23.9769	24.5078	24.6974	24.7832	10	6	8	9	10	11
tiar-1	WBGene00015943	C18A3.5a	0.7042	2.05317	4.76881	0.427392			23.4237	23.7049	23.4375	24.2738	24.006	24.3989	3	6	4	5	7	9
K11D2.5	WBGene00010771	K11D2.5	0.7653	1.23179	2.62256	0.427109			22.6317	22.9278	22.9575	23.2173	24.1305	23.4651	2	2	2	2	2	2
dot-1.1	WBGene00021474	Y39G10AR.18c	0.854167	0.787051	1.70557	0.42691			18.4284	17.8622	19.5533	19.5924	19.41	19.404	NA	NA	1	1	1	1
thoc-2	WBGene00015813	C16A3.8	0.993633	0.527868	1.19936	0.426733			21.5489	19.1052	21.5781	21.7951	21.9139	21.5041	1	NA	1	2	3	2
efl-2	WBGene00001162	Y48C3A.17d	0.787567	1.06484	2.26576	0.426266			18.7226	19.513	19.882	20.124	20.075	20.2813	NA	1	1	1	1	3
K05C4.5	WBGene00010582	K05C4.5	0.673367	2.8242	7.74256	0.42431			21.0009	20.7376	20.9063	21.5197	21.6356	21.5096	1	2	2	2	2	2
lact-9	WBGene00012890	Y45F10D.11a	0.798933	0.97481	2.08043	0.424057			19.0462	17.9672	17.9038	19.0781	19.2902	18.9457	NA	NA	NA	1	3	2
rbbp-5	WBGene00017683	F21H12.1	0.7444	1.36105	2.91302	0.424029			21.4261	21.7601	21.5441	21.8994	22.7159	22.3482	1	2	2	2	4	3
hsp-4	WBGene00002008	F43E2.8a	0.663733	3.20595	9.73969	0.42326			26.8489	26.9721	26.8198	27.6361	27.4658	27.5301	18	25	26	32	31	30
vha-18	WBGene00018698	F52E1.10	0.931133	0.594102	1.32888	0.42311			19.6372	19.4429	17.6353	19.4115	20.3933	19.704	1	NA	NA	1	1	1
msi-1	WBGene00003423	R10E9.1	0.828333	0.835679	1.80147	0.42266			18.5281	19.8452	19.9478	20.3143	20.3228	20.169	NA	1	1	2	2	2
dpy-23	WBGene00001082	R160.1b	0.988233	0.516714	1.17745	0.422449			20.0299	19.4019	17.3154	19.9655	20.1749	19.5715	1	1	NA	2	2	1
acl-1	WBGene00010339	F59F4.4	0.735133	1.38569	2.97	0.420672			20.4078	20.3037	20.4933	21.6193	20.8841	20.9068	1	1	2	1	3	2
F54D8.6	WBGene00018802	F54D8.6	0.688967	2.1174	4.97372	0.420481			22.3271	21.8817	22.151	22.7385	22.7847	22.9035	2	4	3	5	4	5
M04C9.3b	WBGene00010858	M04C9.3b	1.00583	0.490526	1.12586	0.420255			19.9755	17.4417	18.0717	18.6302	20.2279	19.6483	1	NA	NA	NA	1	1
vit-1	WBGene00006925	K09F5.2	0.741567	1.296	2.76513	0.419394			27.2369	27.8474	27.5729	27.8902	28.4934	28.4983	26	43	34	49	53	54
F10E9.3	WBGene00017355	F10E9.3	0.769833	1.07774	2.29267	0.41935			21.9788	22.5213	21.4479	22.4976	22.9181	22.8418	3	4	5	4	5	4
Y49A3A.3	WBGene00013026	Y49A3A.3	1.0267	0.46856	1.08239	0.419309			18.8607	21.7321	21.5301	21.3274	21.8573	22.0183	NA	3	3	3	3	3
vha-3	WBGene00006912	Y38F2AL.4	0.726333	1.45202	3.12615	0.419278			23.4432	23.0757	23.3801	23.6495	24.3447	24.0838	4	4	3	3	5	4
oma-1	WBGene00003864	C09G9.6	0.712933	1.5926	3.47143	0.418052		+	20.725	20.6842	21.0935	21.8392	21.5095	21.2928	1	1	1	4	2	2
his-13	WBGene00001887	ZK131.7	0.7867	0.93219	1.99412	0.415253			26.9168	27.5475	27.7023	27.5497	28.4862	28.4908	13	14	13	12	14	15
lars-1	WBGene00003073	R74.1	0.670933	2.23931	5.38131	0.412964			27.4588	27.5262	27.4214	27.9037	28.2127	28.3028	45	57	48	69	71	70
rpt-6	WBGene00004506	Y49E10.1	0.7124	1.45633	3.13641	0.412474			26.7503	27.3988	26.7882	27.6978	27.5391	27.8376	33	39	36	37	35	37
tbb-2	WBGene00006537	C36E8.5	0.671267	2.19628	5.23456	0.412266			26.6683	27.1085	26.9136	27.5643	27.5958	27.5441	12	15	13	15	14	14
vha-12	WBGene00006921	F20B6.2	0.694133	1.70075	3.75167	0.411944			24.6828	25.3078	25.0256	25.7511	25.7261	25.6214	8	15	10	16	17	17
Y53G8AR.9	WBGene00021816	Y53G8AR.9	0.690967	1.75295	3.89188	0.411893			26.5646	26.1859	26.636	27.3593	26.9855	27.1146	15	14	14	20	22	23
dcap-1	WBGene00021929	Y55F3AM.12	0.6867	1.82867	4.10135	0.411831		+	23.1779	23.0253	22.7515	23.4519	23.8164	23.7465	2	3	2	7	8	8
atg-11	WBGene00020334	T08A9.1	0.7326	1.22559	2.60895	0.411388			21.302	21.3958	21.3083	22.2884	22.402	21.5135	2	2	1	4	6	5
sfxn-1.5	WBGene00011440	T04F8.1	0.677967	1.95822	4.47763	0.410538			22.1122	21.666	21.7131	22.5722	22.5515	22.4015	1	1	2	2	2	4
F40F8.11a	WBGene00044916	F40F8.11a	0.701367	1.54196	3.34469	0.410229			23.1621	22.7508	23.4604	23.8073	23.9037	23.7664	4	2	3	9	11	11
rfc-4	WBGene00004340	F31E3.3	0.691667	1.67251	3.6772	0.409732			22.2487	22.1748	22.3129	22.5751	23.1735	23.0628	3	4	3	5	4	6
F22G12.4c	WBGene00009064	F22G12.4c	0.9743	0.479772	1.1046	0.40902			22.1348	20.6663	19.2714	21.2237	21.5149	22.2568	2	3	NA	1	3	3
mig-15	WBGene00003247	ZC504.4d	0.72	1.29185	2.75583	0.408797			18.556	18.7863	18.0209	19.3098	18.9148	19.2986	NA	NA	NA	1	1	1
flad-1	WBGene00011271	R53.1b	0.6603	2.3347	5.71848	0.408736			19.3912	19.4507	19.5688	19.9599	20.1159	20.3158	1	2	1	2	2	2
mage-1	WBGene00018230	F40E3.2	0.752867	1.02884	2.19112	0.408368			19.343	20.5003	20.0383	20.6114	20.8481	20.6807	NA	1	1	1	1	1
gls-1	WBGene00007975	C36B1.8c	0.675533	1.92348	4.37443	0.408318		+	23.6796	23.997	24.1804	24.6519	24.5327	24.699	6	9	8	14	16	13
B0361.3	WBGene00015157	B0361.3	1.04167	0.42011	0.98568	0.40741			17.6462	20.2255	21.0313	20.68	21.1469	20.2011	NA	1	1	3	2	2
inf-1	WBGene00002083	F57B9.6a	0.65	2.48138	6.2707	0.405324			25.6145	25.6919	25.539	26.4353	26.1117	26.2484	13	15	16	27	24	23
M28.5	WBGene00010896	M28.5	0.7252	1.17678	2.50289	0.405197			23.1098	23.9948	23.4578	24.0794	24.5089	24.1497	3	3	3	3	4	4
asg-1	WBGene00000209	K07A12.3	0.687833	1.5667	3.40626	0.404148			22.0787	21.7388	22.2645	22.4809	22.9328	22.7318	1	1	1	1	1	4
W03A5.4	WBGene00020968	W03A5.4	0.905867	0.535706	1.21474	0.403373			20.8997	20.718	18.5873	21.045	20.8328	21.0448	1	2	1	2	2	1
cee-1	WBGene00017825	F26F4.1	0.6703	1.81534	4.06395	0.402598			23.8973	24.4374	24.208	24.9361	24.861	24.7565	9	13	9	14	15	16
vet-1	WBGene00020261	T05E7.5	0.697533	1.36337	2.91836	0.401108			23.4677	22.7026	23.3395	23.7996	23.9061	23.8967	2	3	3	6	7	6
csn-5	WBGene00000817	B0547.1	0.638567	2.61398	6.80813	0.400658			22.6487	22.5197	22.3747	23.0771	23.2482	23.1335	2	4	4	7	6	8
Y54E10A.11	WBGene00021831	Y54E10A.11	0.827933	0.655975	1.44942	0.399733			19.0895	19.9904	20.308	21.4177	19.9003	20.5537	NA	1	1	1	5	4
ire-1	WBGene00002147	C41C4.4a	0.898467	0.525473	1.19466	0.398952			18.4396	20.3514	20.8839	20.9213	20.5464	20.9026	NA	1	1	3	2	3
iffb-1	WBGene00021857	Y54F10BM.2	0.652867	2.05212	4.76553	0.39882			21.5451	21.8168	21.9092	22.532	22.2524	22.4453	2	3	2	4	3	3
rla-0	WBGene00004408	F25H2.10	0.716067	1.1272	2.39686	0.398091			28.3247	29.2169	28.8999	29.2397	29.681	29.669	33	50	38	47	52	49
pmp-2	WBGene00004059	C44B7.9	0.8528	0.59018	1.32123	0.397491			18.2679	19.0346	17.8267	18.2811	20.1528	19.2537	NA	NA	NA	NA	1	1
rpn-9	WBGene00004465	T06D8.8	0.6568	1.83508	4.11944	0.395796			23.0205	22.6966	22.7463	23.4908	23.2577	23.6853	5	2	4	7	7	7
syx-3	WBGene00006371	F35C8.4	1.0066	0.405479	0.956207	0.394327			17.577	17.6968	19.1178	20.3487	19.7516	17.3111	1	NA	1	1	1	NA
gst-1	WBGene00001749	R107.7	1.038	0.384822	0.914344	0.393892			18.1199	21.4193	21.5669	21.4232	21.6589	21.138	NA	3	1	4	4	3
C39E9.12	WBGene00008035	C39E9.12	0.712767	1.08053	2.29852	0.393772			20.9211	20.3636	21.0973	21.2288	21.9353	21.3562	1	1	2	3	5	2
ztf-18	WBGene00020763	T24C4.7	0.695633	1.15985	2.4665	0.39036			18.375	18.3536	18.3535	18.5565	19.5323	19.0802	NA	1	NA	NA	1	1
F25B5.6c	WBGene00017777	F25B5.6c	0.8121	0.62741	1.39379	0.389935			21.548	22.9435	23.3119	23.1568	23.2199	23.863	2	5	6	7	7	6
rfc-1	WBGene00004337	C54G10.2a	0.673433	1.38225	2.96201	0.389864			23.3847	22.7254	23.3101	23.6964	23.9922	23.7519	3	6	6	11	13	12
H43I07.3	WBGene00019276	H43I07.3	0.8024	0.640978	1.42022	0.388574			17.3499	18.9555	19.1131	19.1916	19.3378	19.2963	NA	1	1	1	1	1
rfc-3	WBGene00004339	C39E9.13	0.634433	1.95831	4.47792	0.386454			21.9971	21.8117	21.8232	22.2731	22.5492	22.713	2	2	2	2	2	2
eif-3.E	WBGene00001228	B0511.10	0.9991	0.385349	0.915417	0.385542			18.5428	21.8519	21.6656	21.7737	21.9761	21.3078	NA	5	2	4	3	3
tag-296	WBGene00018632	F49D11.9	0.628933	2.05504	4.7747	0.385441			20.0437	19.7702	20.1282	20.4631	20.7134	20.6524	1	1	1	2	1	2
C24H12.5c	WBGene00016074	C24H12.5c	0.682333	1.17618	2.50159	0.384899			20.9528	21.6901	21.485	21.7375	22.2532	22.1842	1	2	2	3	3	3
C18E9.4	WBGene00007684	C18E9.4	0.622667	2.13562	5.03306	0.383483			23.5599	23.9697	23.6562	24.3525	24.3505	24.3508	5	7	7	7	8	8
zen-4	WBGene00006974	M03D4.1b	0.6735	1.22605	2.60997	0.383095			21.2632	21.3085	20.9334	21.444	22.2386	21.843	1	2	1	3	3	3
R04B3.2	WBGene00019867	R04B3.2	0.615767	2.29031	5.55952	0.382284			22.0578	21.891	21.8712	22.4899	22.4369	22.7405	3	2	2	3	5	3
F54C8.4a	WBGene00010037	F54C8.4a	0.628033	1.91604	4.35254	0.381948			22.741	22.366	22.5573	23.0074	23.2055	23.3355	5	4	6	6	5	6
cogc-1	WBGene00003258	Y54E10A.2	0.696833	1.00087	2.13363	0.381493			17.9148	18.079	17.2071	18.2455	18.8052	18.2407	1	1	NA	1	1	1
rpac-40	WBGene00019275	H43I07.2	0.594933	3.16239	9.48998	0.380711			22.5436	22.4653	22.4896	22.98	23.1326	23.1707	2	4	5	4	6	6
wht-2	WBGene00007513	C10C6.5	0.724467	0.833573	1.7973	0.38068			17.9548	19.1469	19.1685	19.5547	19.4137	19.4752	NA	1	1	2	1	1
ife-1	WBGene00002059	F53A2.6b	0.605267	2.58875	6.70294	0.380599		+	24.802	24.9304	25.0694	25.605	25.4486	25.564	6	10	8	8	8	10
cel-1	WBGene00000466	C03D6.3a	0.635367	1.68874	3.71987	0.380276			23.2856	22.9702	23.2497	23.5527	24.0314	23.8275	3	5	6	6	8	8
rgs-7	WBGene00004350	F56B6.2e	0.891533	0.453595	1.05265	0.37987			18.9362	18.7729	17.3739	17.8794	19.9584	19.9198	NA	NA	NA	NA	1	1
abcf-3	WBGene00018339	F42A10.1	0.618133	2.07541	4.83902	0.37975			24.3298	24.3945	24.0207	24.7604	24.8949	24.9441	6	15	13	20	17	22
M05D6.6	WBGene00010879	M05D6.6	0.660133	1.29072	2.75329	0.379439			22.1862	21.4328	22.0078	22.5094	22.679	22.4188	2	2	2	2	2	2
farl-11	WBGene00017349	F10E7.8	0.9315	0.408265	0.961831	0.37736			20.8283	18.2246	17.7088	19.992	19.7274	19.8368	1	NA	NA	3	1	2
let-418	WBGene00002637	F26F12.7	0.597567	2.52458	6.44166	0.375175			26.3142	26.1272	26.1979	26.7038	26.7728	26.9554	28	34	32	38	42	38
sams-3	WBGene00015538	C06E7.1a	0.587367	3.02399	8.73534	0.374778			27.3951	27.6052	27.444	28.1127	28.0525	28.0412	16	23	21	28	27	27
rnr-1	WBGene00004391	T23G5.1	0.6846	0.974061	2.0789	0.37424			29.3719	30.3779	29.8806	30.2509	30.7145	30.7188	88	108	94	112	117	106
Y50D7A.1	WBGene00021751	Y50D7A.1	0.607867	2.07886	4.84997	0.373995			21.8469	21.5479	21.8338	22.2712	22.2729	22.5081	2	2	3	3	3	3
vit-2	WBGene00006926	C42D8.2a	0.667433	1.1021	2.34379	0.373961			31.7887	32.5449	32.0545	32.4422	32.9316	33.0166	245	313	278	304	325	326
odr-4	WBGene00003851	Y102E9.1a	0.668033	1.09612	2.33122	0.373922			19.7276	19.9064	19.8066	20.2547	21.0419	20.1481	1	1	1	1	1	1
top-2	WBGene00010785	K12D12.1	0.593567	2.60845	6.78495	0.373904			25.2064	25.0838	25.1409	25.5773	25.8152	25.8193	13	20	20	21	30	28
ggtb-1	WBGene00015099	B0280.1b	0.699	0.865712	1.86105	0.372682			18.353	17.1487	17.6987	18.6698	18.446	18.1816	NA	1	NA	NA	1	1
dap-3	WBGene00000933	C14A4.2	0.989833	0.35602	0.855416	0.372519			17.5402	21.106	20.8209	20.4944	20.8502	21.092	NA	1	1	3	2	2
itsn-1	WBGene00006405	Y116A8C.36c	1.12073	0.301901	0.74254	0.37242			18.551	23.194	22.9443	22.7048	22.7904	22.5563	NA	3	3	2	2	2
lap-2	WBGene00002250	W07G4.4	0.826033	0.502018	1.14853	0.37222			20.0869	21.8405	20.479	20.7066	22.3492	21.8287	1	3	1	5	5	5
skih-2	WBGene00008502	F01G4.3	0.711	0.800615	1.73225	0.372164			19.5314	19.5744	19.1152	19.545	20.8459	19.9631	2	1	1	2	1	2
Y54H5A.2	WBGene00021900	Y54H5A.2	0.597333	2.28803	5.55146	0.371569			18.7051	18.9979	18.7274	19.4223	19.4895	19.3106	1	1	1	1	1	1
ZK643.5	WBGene00014036	ZK643.5	0.888167	0.425535	0.996573	0.371428			18.4374	21.0276	21.1174	21.0215	20.8608	21.3646	NA	2	2	1	2	2
igdb-2	WBGene00007736	C25G4.10a	0.641133	1.30799	2.79212	0.370678			22.8755	22.129	22.2657	23.0573	23.055	23.0813	4	6	5	6	7	6
vit-3	WBGene00006927	F59D8.1	0.6096	1.86493	4.20436	0.370579			28.6396	28.9604	28.7289	29.2038	29.3731	29.5808	31	38	34	35	41	40
cpn-2	WBGene00000778	D1069.2	0.638267	1.33666	2.85714	0.370355			25.3207	25.7466	25.4814	25.7935	26.4106	26.2594	5	10	9	8	11	11
apb-1	WBGene00000160	Y71H2B.10c	0.8954	0.412091	0.969543	0.369461			21.3809	18.5292	21.1943	21.2637	21.3807	21.1462	1	NA	1	4	5	4
adr-1	WBGene00000079	H15N14.1c	0.568533	3.60463	12.3309	0.367719			26.3508	26.3318	26.3688	26.9243	26.8388	26.9939	25	37	35	38	39	39
F21D5.7	WBGene00009012	F21D5.7	0.888967	0.411296	0.967943	0.367583			19.7578	19.9123	17.0951	19.8586	19.9292	19.6443	1	1	NA	1	2	2
M05D6.2	WBGene00010875	M05D6.2	0.5761	2.9759	8.48632	0.367437			26.1908	26.336	26.156	26.7954	26.7396	26.8761	19	23	20	27	30	35
B0464.6	WBGene00007186	B0464.6	0.6358	1.25272	2.66866	0.365771			21.2646	21.41	21.8981	22.2052	22.3796	21.8953	2	2	3	4	4	3
rpn-3	WBGene00004460	C30C11.2	0.5808	2.49347	6.31817	0.364841			26.2292	26.3114	26.0613	26.772	26.6911	26.8812	20	22	20	32	25	29
alh-13	WBGene00011938	T22H6.2a	0.715833	0.695946	1.52731	0.363609			22.6556	24.0532	22.8715	23.6396	24.2401	23.8481	4	6	5	9	8	8
hpo-12	WBGene00016588	C42C1.10a	0.701233	0.750531	1.63394	0.36349			18.1382	17.3863	18.8146	18.6721	18.7213	19.0494	NA	NA	NA	1	1	1
F10C2.4	WBGene00008645	F10C2.4	0.6291	1.26497	2.69582	0.362936			22.5421	21.9271	22.1975	22.5905	23.1134	22.8501	2	2	3	7	6	7
tomm-20	WBGene00009092	F23H12.2	0.579767	2.39122	5.92627	0.362846			22.2271	22.1969	22.2654	22.7256	22.7024	23.0007	2	2	2	2	2	2
nrd-1	WBGene00017004	D1007.7	0.5765	2.51009	6.38389	0.362509			21.8732	21.9249	22.0133	22.4875	22.6643	22.3891	2	2	2	4	6	6
K10D2.1b	WBGene00019627	K10D2.1b	0.8844	0.397193	0.939453	0.362251			19.0482	19.4785	16.9838	19.8038	20.0463	18.3136	NA	1	NA	2	2	NA
taf-13	WBGene00006397	C14A4.10	0.673033	0.873365	1.87628	0.362098			19.869	18.7008	19.6388	20.1338	20.0709	20.023	1	1	1	1	1	1
gop-2	WBGene00001661	C34E10.2	0.998367	0.324609	0.790281	0.361294			17.4549	21.0213	21.3991	20.7013	21.1338	21.0353	NA	1	1	1	2	1
par-4	WBGene00003919	Y59A8B.14b	0.6877	0.786092	1.70368	0.361253			19.4459	18.8528	18.9138	19.2774	20.456	19.5422	NA	1	1	1	2	1
Y55F3AM.6b	WBGene00021924	Y55F3AM.6b	0.817967	0.461947	1.06926	0.361136			20.79	18.6903	21.0413	21.3116	20.7206	20.9433	2	NA	1	1	1	1
snr-5	WBGene00004918	ZK652.1	0.620667	1.32436	2.82916	0.360982		+	22.912	23.521	22.8847	23.6305	23.6849	23.8643	3	5	4	4	5	7
nsy-1	WBGene00003822	F59A6.1	0.9309	0.356192	0.855769	0.359727			17.2768	20.2392	20.7063	20.0035	20.5867	20.4248	NA	1	3	1	4	3
pab-1	WBGene00003902	Y106G6H.2a	0.576233	2.27741	5.51399	0.359135		+	29.966	30.2942	30.1988	30.7691	30.6539	30.7647	71	85	80	90	84	90
F35G12.11	WBGene00009444	F35G12.11	0.615867	1.32623	2.83341	0.358613			21.4985	21.6783	21.6316	22.6117	22.1532	21.8911	1	3	1	5	4	7
drp-1	WBGene00001093	T12E12.4a	0.585	1.88025	4.2484	0.357209			21.8802	21.8274	21.773	22.1646	22.6258	22.4452	2	2	3	5	3	5
rab-7	WBGene00004271	W03C9.3	1.04627	0.296391	0.730864	0.356899			17.9015	21.9711	22.3772	21.6266	21.881	21.881	NA	2	4	3	1	2
mdf-2	WBGene00003161	Y69A2AR.30a	0.6228	1.18623	2.52328	0.356533			22.663	22.1986	22.8479	22.9554	23.142	23.4805	3	2	2	5	5	4
marb-1	WBGene00009436	F35G2.2	0.5744	2.1536	5.09213	0.35615			28.0858	27.8691	27.9847	28.3666	28.647	28.6492	20	21	21	21	23	23
skr-16	WBGene00004822	C42D4.6	0.703933	0.660524	1.45828	0.355035			19.3999	19.8795	20.1528	21.2797	20.471	19.7933	NA	1	1	2	1	1
E01A2.2a	WBGene00017085	E01A2.2a	0.579467	1.92433	4.37694	0.35498			22.889	22.6264	22.9952	23.3392	23.345	23.5648	4	8	7	9	7	8
F42G10.1	WBGene00009645	F42G10.1	1.1232	0.269624	0.673578	0.3546			19.4911	21.9159	18.8971	18.5517	23.2137	21.9083	NA	2	NA	NA	2	1
F38A1.8	WBGene00009521	F38A1.8	0.776167	0.489536	1.12391	0.354317			18.1352	19.2657	18.5576	18.2213	20.1356	19.9301	NA	1	1	1	5	3
T14G10.5a	WBGene00011775	T14G10.5a	0.5506	3.12747	9.29405	0.35312			23.831	23.806	23.9786	24.3746	24.4359	24.4569	7	14	10	15	21	19
ppm-1	WBGene00006460	F25D1.1b	0.558867	2.57688	6.65391	0.352822			23.2412	23.3572	23.3385	23.7816	24.0221	23.8098	4	7	9	6	8	8
skr-7	WBGene00004813	Y47D7A.1	0.568067	2.12987	5.01425	0.352117			23.5737	23.3412	23.6933	24.0301	24.0928	24.1895	5	3	4	5	5	5
F20C5.6	WBGene00008971	F20C5.6	0.636433	0.934652	1.99909	0.350004			20.0957	19.6114	20.1634	20.9378	20.7737	20.0683	1	1	1	1	1	1
smg-3	WBGene00004881	Y73B6BL.18a	0.8218	0.404435	0.954098	0.348023			17.5978	17.8769	20.3018	19.2967	19.5341	19.4111	NA	NA	NA	1	2	1
pbs-6	WBGene00003952	C02F5.9	0.684933	0.66062	1.45847	0.347748			23.2197	24.8196	23.7881	24.5612	24.6368	24.6842	7	9	10	9	11	11
Y57A10A.26	WBGene00013266	Y57A10A.26	0.7034	0.590625	1.3221	0.346156			21.5512	22.8637	21.8179	22.2503	23.4422	22.6505	1	5	4	3	6	4
hda-4	WBGene00001837	C10E2.3a	0.573567	1.65168	3.62284	0.345872			21.9841	22.1758	22.1914	22.9644	22.6291	22.4785	2	3	3	5	5	6
F37D6.2b	WBGene00009508	F37D6.2b	0.858333	0.364134	0.872088	0.345513			17.2827	20.2767	20.0381	19.6744	20.4139	20.0842	NA	1	1	1	2	2
rsks-1	WBGene00012929	Y47D3A.16	0.533967	3.47517	11.4253	0.345222			23.6616	23.6998	23.7163	24.1533	24.3049	24.2214	3	10	5	10	10	12
mec-8	WBGene00003172	F46A9.6	0.609433	1.0767	2.29049	0.345079			21.9397	22.5529	21.9761	22.4221	23.0117	22.8632	2	2	3	3	3	3
ttll-12	WBGene00008405	D2013.9	0.590867	1.29233	2.7569	0.344665			23.6569	23.5787	23.0318	24.1769	23.8898	23.9733	3	7	4	11	10	12
Y51F10.2c	WBGene00021763	Y51F10.2c	0.688267	0.619084	1.37757	0.344198			18.5755	17.4658	19.1554	19.1678	19.13	18.9637	NA	NA	NA	1	1	1
sec-12	WBGene00010496	K02B12.3	0.5746	1.53438	3.32594	0.343503			18.5137	18.8166	18.9836	19.153	19.5123	19.3724	NA	1	1	2	1	2
mogs-1	WBGene00008775	F13H10.4b	0.6039	1.09384	2.32642	0.343206			19.9001	19.0345	19.6213	20.0359	20.1298	20.2019	1	1	1	1	1	2
nduf-2.2	WBGene00006463	T26A5.3	0.6505	0.750742	1.63435	0.342726			21.9282	20.6641	21.231	22.1927	21.9345	21.6476	1	2	2	4	4	4
uggt-1	WBGene00018604	F48E3.3	0.667567	0.670399	1.47752	0.342023			26.5812	27.7292	27.2127	27.2342	28.2153	28.0763	32	59	50	58	74	72
lpr-6	WBGene00012255	W04G3.1b	0.716067	0.530685	1.20489	0.341912			18.724	20.7489	20.0181	20.4625	20.6413	20.5354	NA	1	1	1	2	2
C50D2.9	WBGene00016812	C50D2.9	0.592233	1.16473	2.47696	0.340541			18.3101	18.7996	19.1242	19.3085	19.2968	19.4053	NA	1	1	1	1	1
C44B7.5	WBGene00016627	C44B7.5	0.607233	1.00573	2.14358	0.340515			23.7841	22.8323	23.4373	23.8698	24.0558	23.9498	6	3	6	5	5	5
T10B10.3	WBGene00011680	T10B10.3	0.766367	0.435142	1.01582	0.339938			17.8104	17.7658	17.0842	16.8923	18.9176	19.1496	NA	NA	NA	NA	2	1
rpb-11	WBGene00012187	W01G7.3	0.5769	1.34124	2.86759	0.339118			22.2933	22.6537	22.6019	23.3752	23.1065	22.7979	3	5	4	5	5	6
cyk-4	WBGene00000875	K08E3.6	0.787933	0.404624	0.954481	0.338822			18.2991	20.2729	18.8151	18.8731	20.8623	20.0155	NA	1	NA	NA	2	1
par-1	WBGene00003916	H39E23.1e	0.596267	1.06076	2.25726	0.33799			20.9045	21.0301	21.0503	22.1047	21.4077	21.2613	3	1	2	2	2	1
rsp-2	WBGene00004699	W02B12.2	0.535533	2.4977	6.33482	0.337974			24.3445	24.3949	24.5631	24.8777	24.9711	25.0603	6	9	10	11	10	9
cct-6	WBGene00000381	F01F1.8a	0.6309	0.78983	1.71103	0.33761			24.9859	26.213	25.3363	26.1789	26.0387	26.2103	15	27	15	24	28	28
cpf-2	WBGene00000774	F56A8.6	0.615067	0.890461	1.91039	0.337585			21.3486	22.1099	22.3657	22.3833	22.5505	22.7356	1	3	3	4	5	5
C09E7.4	WBGene00015638	C09E7.4	1.08467	0.250969	0.633048	0.337544			19.273	20.8203	16.9511	17.5225	21.5724	21.2035	NA	NA	NA	NA	3	2
Y18D10A.11	WBGene00012481	Y18D10A.11	0.521233	3.4997	11.5918	0.337375			23.6084	23.6954	23.6772	24.1736	24.2481	24.123	6	9	8	12	12	14
T23E7.2e	WBGene00020732	T23E7.2e	0.791333	0.393891	0.932762	0.33697			21.3493	21.2988	18.8392	21.0432	21.6453	21.1728	1	3	NA	3	4	3
unc-96	WBGene00006825	F13C5.6a	0.671767	0.608143	1.35625	0.336673			17.0947	17.8084	17.4729	17.9935	18.9699	17.4279	NA	1	NA	1	1	1
ath-1	WBGene00010564	K04G2.5a	0.525333	3.00387	8.63037	0.336564			24.8701	24.7437	24.7432	25.3658	25.2243	25.3429	11	11	10	11	15	13
zoo-1	WBGene00013683	Y105E8A.26d	0.632233	0.750449	1.63378	0.335051			18.4619	19.5982	18.6714	19.324	19.8705	19.4337	1	1	NA	1	1	1
fln-1	WBGene00022048	Y66H1B.2n	1.1658	0.230527	0.587994	0.334743			18.1766	18.1448	23.1313	18.8093	21.9601	22.1807	NA	NA	1	NA	2	1
isw-1	WBGene00002169	F37A4.8	0.594667	0.983175	2.09747	0.333424			23.0644	23.6658	23.5826	23.6443	24.0777	24.3748	6	10	9	10	14	12
ncl-1	WBGene00003559	ZK112.2	0.556367	1.5156	3.27978	0.333226			23.975	24.4367	23.9731	24.6426	24.8225	24.5888	7	13	9	9	12	11
mcm-7	WBGene00003159	F32D1.10	0.517033	3.14126	9.37095	0.33246			28.3958	28.3162	28.3449	28.9672	28.8024	28.8384	58	72	62	83	82	78
icp-1	WBGene00002047	Y39G10AR.13b	0.622167	0.760278	1.65303	0.331578			18.2651	19.2693	18.7305	18.9258	19.743	19.4626	NA	1	1	1	1	1
ppfr-1	WBGene00008878	F16A11.3a	0.539433	1.86759	4.21196	0.331333			22.8246	22.7207	23.1427	23.4034	23.4418	23.4611	7	5	5	8	11	10
skr-2	WBGene00004808	F46A9.4	0.6682	0.573143	1.28798	0.330989			19.4804	17.8852	18.0519	18.9246	19.3086	19.1889	NA	1	1	1	1	1
nduf-6	WBGene00009051	F22D6.4	0.598467	0.904999	1.93948	0.330906			22.5076	22.6161	23.1338	23.2718	22.9795	23.8016	6	4	4	6	5	6
sec-6	WBGene00017284	F09E5.5	0.668667	0.564471	1.27104	0.33003			18.4138	17.6263	18.9049	18.2413	19.3852	19.3245	NA	1	NA	1	2	1
rpn-1	WBGene00004458	T22D1.9	0.5322	2.03328	4.70669	0.329929			25.1567	24.857	24.8998	25.57	25.5636	25.3765	11	12	11	17	19	20
ZK856.16	WBGene00050936	ZK856.16	0.755133	0.399213	0.943541	0.328273			21.7261	19.5656	22.1231	21.8554	22.0739	21.7509	1	NA	1	1	1	2
sar-1	WBGene00022678	ZK180.4	0.536833	1.5446	3.35123	0.323357			19.6084	19.4096	19.2482	19.7341	20.1521	19.9905	1	1	1	1	1	1
pyk-1	WBGene00009126	F25H5.3a	0.5596	1.12713	2.39671	0.322818			23.7835	24.484	23.8083	24.556	24.6696	24.529	8	14	10	11	12	12
mrpl-54	WBGene00009128	F25H5.6	0.890867	0.285067	0.706747	0.322717			22.8023	18.9713	22.4991	21.7816	22.7145	22.4492	1	1	1	1	3	2
ribo-1	WBGene00020683	T22D1.4	0.508167	2.55345	6.5581	0.322137			26.0808	26.0929	26.1406	26.5583	26.5187	26.7618	22	20	21	23	29	27
chk-1	WBGene00000498	Y39H10A.7a	0.571967	0.955178	2.04057	0.321276			22.8746	23.7407	23.4589	23.7107	24.1065	23.9729	4	7	6	6	6	6
cey-1	WBGene00000472	F33A8.3	0.521467	1.84953	4.16038	0.320835			28.5402	28.3582	28.7517	29.1697	28.989	29.0558	15	15	14	17	16	15
trap-3	WBGene00021420	Y38F2AR.2	0.5595	1.06472	2.2655	0.32027			23.078	22.6156	23.2919	23.7926	23.2907	23.5807	5	5	5	6	5	5
letm-1	WBGene00010279	F58G11.1b	0.538833	1.29658	2.76644	0.317938			19.5325	19.3501	19.748	19.768	20.2351	20.244	1	2	1	2	3	4
mdt-6	WBGene00003164	Y57E12AL.5	0.517533	1.7994	4.01952	0.317748			19.4294	19.4308	19.799	20.0085	20.0632	20.1401	NA	1	1	1	1	1
Y48A6B.3	WBGene00012964	Y48A6B.3	0.552367	1.08312	2.30393	0.317498			21.2245	21.1911	21.3623	22.2747	21.6385	21.5218	1	3	2	2	2	1
acdh-1	WBGene00016943	C55B7.4a	0.597467	0.715155	1.56478	0.317494			21.6634	22.8304	22.3309	22.5338	22.9491	23.1342	3	5	2	4	7	4
pars-1	WBGene00004189	T20H4.3a	0.506067	2.13189	5.02086	0.316135			28.0808	28.3244	28.2249	28.5818	28.7391	28.8274	45	52	47	57	53	59
F35G12.12	WBGene00009445	F35G12.12	0.698067	0.41795	0.981337	0.315676			17.997	19.8058	18.0361	18.8745	20.0839	18.9747	1	1	1	1	2	1
rpb-6	WBGene00007355	C06A1.5	0.8161	0.305944	0.751084	0.315515			18.0756	21.2286	21.4248	21.099	20.9507	21.1276	NA	1	1	2	1	1
F53B1.4	WBGene00018737	F53B1.4	0.563667	0.904474	1.93843	0.314759			23.9344	23.2825	22.9605	23.8876	23.9275	24.0533	3	5	1	10	9	8
vha-13	WBGene00013025	Y49A3A.2	0.530067	1.31632	2.81095	0.313914			24.9635	25.5741	25.1828	25.7903	25.6567	25.8636	15	24	19	25	24	24
dnj-29	WBGene00001047	Y63D3A.6b	0.525133	1.36705	2.92685	0.312687			21.5636	21.4342	21.2176	21.7509	22.2246	21.8153	1	3	3	3	2	2
cct-8	WBGene00021934	Y55F3AR.3a	0.6159	0.578351	1.29815	0.311936			25.1181	26.6663	25.4434	26.2647	26.3572	26.4536	18	31	19	27	24	29
daf-21	WBGene00000915	C47E8.5	0.515433	1.54751	3.35843	0.311727			30.4377	30.8627	30.4589	31.0009	31.0771	31.2276	102	120	106	119	122	116
wdr-48	WBGene00009441	F35G12.4a	0.631767	0.526564	1.1968	0.311541			20.9249	22.3594	22.4284	22.3205	22.9277	22.3598	2	4	3	4	6	5
ZK836.2a	WBGene00014098	ZK836.2a	0.659	0.460695	1.06677	0.311179			20.135	22.0298	21.0646	21.162	22.0453	21.9991	1	5	3	2	4	5
sup-26	WBGene00006331	R10E4.2b	0.500433	1.97407	4.52531	0.310715			27.9529	27.975	28.2824	28.539	28.5414	28.6312	25	24	25	33	29	29
npp-1	WBGene00003787	K07F5.13b	0.545	0.991194	2.11383	0.310042			21.3295	20.7069	21.2005	21.3036	21.9044	21.6639	1	3	1	4	3	3
dnj-5	WBGene00001023	C04A2.7b	0.7783	0.314067	0.768192	0.30969			19.1916	17.9273	20.8017	20.4964	20.8161	18.943	NA	NA	1	1	1	NA
exos-4.2	WBGene00000202	Y6D11A.1	0.5086	1.61749	3.53473	0.309389			20.3712	20.315	20.1812	20.7066	21.0586	20.628	1	1	1	1	1	1
ddx-19	WBGene00011580	T07D4.4a	0.5054	1.71163	3.78061	0.309363			26.5591	26.1129	26.3209	26.8011	26.8008	26.9072	35	29	30	39	38	34
git-1	WBGene00008805	F14F3.2	0.6154	0.551836	1.24633	0.308662			19.4464	17.7975	18.8019	19.4862	19.0839	19.3219	NA	NA	NA	1	1	1
ncam-1	WBGene00017184	F02G3.1b	0.531533	1.10089	2.34125	0.307773			19.1304	19.212	19.7476	19.9642	20.0567	19.6637	2	1	2	1	1	1
rsp-8	WBGene00004705	C18D11.4a	0.525433	1.15457	2.45519	0.306552			24.3418	24.4568	24.8604	24.7905	25.2547	25.1901	5	6	7	6	7	8
ccch-2	WBGene00009537	F38C2.5	0.5375	0.987352	2.10599	0.306229			19.7936	19.9838	20.3917	20.906	20.2676	20.608	1	1	1	1	1	1
sodh-1	WBGene00010790	K12G11.3	0.5184	1.22889	2.6162	0.305273			25.1619	25.7968	25.598	25.9254	26.1474	26.0391	14	16	16	17	19	19
R02F2.9	WBGene00019838	R02F2.9	0.693133	0.376412	0.897208	0.305003			18.5753	20.8529	20.9181	20.8849	20.6927	20.8481	NA	1	1	1	1	1
dpy-11	WBGene00001073	F46E10.9	0.503433	1.52267	3.29711	0.304615			23.449	23.4422	23.4325	23.7124	23.8893	24.2323	5	5	7	6	5	6
C47B2.2	WBGene00008131	C47B2.2	0.499733	1.61695	3.53336	0.304449			25.9069	26.0089	26.1262	26.2622	26.6622	26.6168	13	17	15	18	23	22
arx-3	WBGene00000201	Y79H2A.6	0.8376	0.267148	0.668228	0.304199			19.1174	19.9486	18.0126	17.687	21.4174	20.487	NA	1	NA	NA	3	2
snrp-200	WBGene00012896	Y46G5A.4	0.5123	1.27381	2.7155	0.303377			22.8208	23.3232	23.307	23.504	23.662	23.8219	4	12	6	12	17	14
sec-61	WBGene00013311	Y57G11C.15a	0.470733	3.0785	9.0257	0.303277			24.5949	24.4786	24.5821	24.9503	25.0719	25.0456	4	5	5	7	7	9
alg-2	WBGene00000106	T07D3.7b	0.5287	1.00433	2.14071	0.302638			26.9167	27.3914	27.2302	27.3004	27.918	27.906	31	35	35	39	40	42
atad-3	WBGene00010015	F54B3.3	0.493433	1.65985	3.6441	0.301719			27.93	28.3311	27.936	28.5583	28.513	28.6061	44	58	49	59	56	52
Y39A1A.21a	WBGene00012658	Y39A1A.21a	0.785767	0.285497	0.707666	0.301018			18.3097	16.7507	20.1902	18.3413	20.053	19.2136	NA	NA	NA	NA	2	1
klp-15	WBGene00002225	M01E11.6	0.537933	0.863292	1.85624	0.300555			22.2234	21.6032	21.3035	22.4318	22.2366	22.0755	2	3	4	4	5	4
Y47D3A.29a	WBGene00012936	Y47D3A.29a	0.485267	1.81589	4.06549	0.299665			23.8898	23.8591	24.1335	24.2967	24.4624	24.5791	8	13	10	18	17	18
let-70	WBGene00002344	M7.1	0.632667	0.443498	1.03252	0.299453			23.5393	24.143	24.0512	23.4488	25.4395	24.7432	3	5	5	4	5	5
C27A12.7b	WBGene00016157	C27A12.7b	0.478967	2.05393	4.77121	0.299282			21.334	21.2426	21.1697	21.8805	21.7285	21.5742	1	1	2	2	4	4
npp-5	WBGene00003791	F07A11.3	0.5232	0.985387	2.10198	0.299158			19.9966	19.3488	20.0474	20.4273	20.4277	20.1074	1	2	1	2	2	2
ent-2	WBGene00010701	K09A9.3	0.831733	0.25827	0.648973	0.299011			21.707	20.3986	17.4477	20.3036	21.1164	20.6285	1	1	NA	1	1	2
ero-1	WBGene00001334	Y105E8B.8a	0.5054	1.24226	2.64559	0.29887			22.197	22.81	22.4253	22.908	23.1167	22.9238	2	4	5	6	7	5
let-413	WBGene00002632	F26D11.11a	0.5588	0.686604	1.5091	0.298778			21.5228	22.4473	21.9262	22.066	22.9509	22.5558	1	4	3	5	6	6
W07E11.1a	WBGene00012326	W07E11.1a	0.4678	2.55231	6.55345	0.2977			25.6103	25.4991	25.61	25.9805	25.9793	26.163	22	27	25	37	47	39
lin-28	WBGene00003014	F02E9.2b	0.488433	1.55133	3.36792	0.296915			24.6563	24.2676	24.4495	25.1214	24.9062	24.8111	7	7	7	9	9	9
ivd-1	WBGene00015326	C02B10.1	0.571933	0.58418	1.30952	0.295306			20.7823	22.1523	21.1057	21.6926	22.177	21.8865	2	2	2	2	2	2
cyn-12	WBGene00000888	C34D4.12a	0.515	0.9692	2.06902	0.294469			23.1198	23.6807	23.9522	24.0491	24.0628	24.1858	3	5	4	6	5	7
mrg-1	WBGene00003406	Y37D8A.9a	0.5168	0.914082	1.9577	0.292973			21.6999	21.3639	21.5677	22.5124	21.6694	22.0001	1	3	2	3	3	3
math-33	WBGene00010406	H19N07.2g	0.467033	2.0782	4.8479	0.292566			24.5938	24.8644	24.6415	25.1048	25.2619	25.1341	11	18	15	22	20	21
let-716	WBGene00002850	C16A3.3	0.7495	0.283403	0.703187	0.292105			18.6174	20.9486	17.3092	19.6334	19.8193	19.671	NA	NA	NA	1	2	1
him-17	WBGene00001874	T09E8.2	0.514933	0.903215	1.93591	0.291583			20.2778	19.663	20.3886	20.845	20.6665	20.3627	1	1	1	1	1	4
C06A5.1	WBGene00015499	C06A5.1	0.6714	0.346746	0.836285	0.291554			20.4326	17.8884	20.1248	20.2087	20.1817	20.0696	1	NA	1	2	2	2
npp-8	WBGene00003794	Y41D4B.19b	0.4688	1.90371	4.31646	0.291432			23.0927	22.8457	23.0405	23.3055	23.5287	23.5511	5	6	8	8	9	7
F11C1.5e	WBGene00008694	F11C1.5e	0.7712	0.268745	0.67168	0.29122			19.1584	19.1058	18.4689	17.4607	21.1188	20.4672	NA	1	NA	3	1	2
ulp-2	WBGene00006737	Y38A8.3	0.6185	0.42287	0.991223	0.291199			19.5512	18.0497	19.9877	20.2028	19.4737	19.7676	NA	NA	1	1	2	2
Y54G11A.3	WBGene00013214	Y54G11A.3	0.459167	2.33852	5.73233	0.290593			20.4495	20.6085	20.6639	21.0827	20.9375	21.0792	1	1	1	2	3	2
C40A11.4	WBGene00016547	C40A11.4	0.475833	1.54773	3.35897	0.289849			21.1658	21.1926	21.4735	21.6547	21.9569	21.6478	2	3	2	2	2	3
hpo-31	WBGene00010089	F55B12.4	0.699133	0.312114	0.764085	0.289497			20.7535	20.3074	18.0337	20.9216	20.5569	19.7135	1	2	NA	1	2	2
col-99	WBGene00000674	F29C4.8d	0.701567	0.30973	0.759067	0.289396			17.5066	20.4315	19.8571	19.8484	20.4138	19.6377	NA	1	NA	1	1	2
tag-349	WBGene00013538	Y73F8A.34a	0.666533	0.342295	0.827075	0.289057			18.5152	18.6762	17.6769	17.4753	19.5689	19.8237	NA	1	NA	NA	1	1
mrpl-16	WBGene00011412	T04A8.11	0.663533	0.339788	0.82188	0.287575			19.6736	17.3492	19.3799	18.7783	19.7952	19.8198	1	NA	2	NA	1	2
mans-1	WBGene00008411	D2030.1	0.5293	0.702441	1.53998	0.287085			19.9963	19.1679	19.9069	19.9989	19.9967	20.6634	1	1	1	2	2	2
mrpl-4	WBGene00020717	T23B12.2	0.476333	1.35134	2.89072	0.286124			21.5645	21.2068	21.2226	21.5874	21.8527	21.9828	2	4	3	3	5	2
mtch-1	WBGene00018395	F43E2.7a	0.5164	0.769001	1.67013	0.28543			19.8379	19.0022	19.7942	19.772	20.259	20.1525	1	1	1	1	1	1
rpb-10	WBGene00021347	Y37E3.3	0.470367	1.44577	3.11125	0.284867			22.725	22.705	23.0863	23.3503	23.1428	23.4343	3	3	2	5	6	5
K01G5.5	WBGene00010478	K01G5.5	0.526433	0.68661	1.50911	0.284737			22.5142	23.3134	23.6065	23.8076	23.4255	23.7803	5	9	5	13	11	9
emc-2	WBGene00021973	Y57G7A.10	0.4631	1.6176	3.53502	0.283936			23.9218	24.3389	24.2809	24.6565	24.6195	24.6549	8	12	11	14	12	12
snx-1	WBGene00004927	C05D9.1	0.4369	3.349	10.6037	0.28348			23.6488	23.6908	23.5634	24.1026	24.0437	24.0674	9	8	7	9	8	8
ketn-1	WBGene00004130	F54E2.3f	1.03853	0.180937	0.475444	0.281877			18.0861	23.1165	18.9651	18.543	23.8578	20.8825	NA	13	NA	NA	10	1
F25H2.4	WBGene00009118	F25H2.4	0.4875	0.994948	2.12151	0.281826			24.0612	23.5148	23.94	24.0113	24.4422	24.525	3	3	5	6	6	8
T19B10.2	WBGene00011831	T19B10.2	0.525167	0.647394	1.43271	0.281356			19.2165	20.4274	19.8947	20.4195	20.529	20.1656	1	2	1	3	2	2
mdt-29	WBGene00007025	K08E3.8	0.806633	0.231404	0.589943	0.281321			21.237	17.4584	21.8121	21.0423	20.8358	21.0493	1	NA	1	1	1	1
fntb-1	WBGene00006465	F23B12.6	0.591333	0.401246	0.947654	0.278406			19.0116	18.4782	18.2555	18.0094	19.7937	19.7162	NA	NA	NA	NA	1	1
eef-1G	WBGene00008920	F17C11.9b	0.4493	1.60024	3.49078	0.275862			28.2871	28.4828	28.5229	28.7651	28.7834	29.0922	20	26	25	29	31	33
abce-1	WBGene00012714	Y39E4B.1	0.774967	0.232284	0.591896	0.275858			20.206	20.7857	16.6156	20.135	20.0447	19.7525	1	1	NA	1	1	1
Y110A7A.19	WBGene00022464	Y110A7A.19	0.450467	1.55767	3.3837	0.275831			21.228	20.897	21.1738	21.554	21.401	21.6952	1	2	1	2	2	2
C45G9.2	WBGene00016674	C45G9.2	0.545433	0.494399	1.13351	0.275306			18.6462	18.7526	18.6358	18.265	19.7379	19.668	NA	1	1	NA	1	1
pha-1	WBGene00004010	Y48A6C.5b	0.485733	0.802079	1.73513	0.272893			20.7243	20.0381	20.6504	20.711	21.2985	20.8605	1	3	2	1	1	2
glh-2	WBGene00001599	C55B7.1	0.444767	1.46295	3.15226	0.271018		+	25.7759	25.3854	25.683	26.2149	25.9797	25.984	15	19	17	21	14	22
mrps-25	WBGene00021920	Y55F3AM.1	0.4813	0.797901	1.72691	0.27059			23.6369	24.4933	24.0028	24.6754	24.6284	24.2731	3	5	5	7	6	5
pas-6	WBGene00003927	CD4.6	0.4641	0.995161	2.12194	0.270027			24.4371	25.042	24.3549	25.1042	25.1068	25.0153	7	14	9	13	14	14
cct-3	WBGene00018782	F54A3.3	0.4879	0.720133	1.5745	0.269577			23.8359	24.6887	23.7903	24.3922	24.7355	24.6509	7	10	7	10	13	14
Y102E9.2b	WBGene00022420	Y102E9.2b	0.4529	1.17324	2.49525	0.269342			28.4558	29.0251	28.6185	29.0493	29.2739	29.1349	37	50	51	44	49	47
F09G8.7	WBGene00017321	F09G8.7	0.640467	0.295396	0.728752	0.269233			18.3491	18.9509	17.1824	19.3768	19.6361	17.3909	NA	1	NA	1	1	1
ttx-1	WBGene00006652	Y113G7A.6b	0.460767	0.997496	2.12672	0.268409			18.0731	18.6826	18.6761	19.0583	18.9642	18.7916	NA	1	NA	1	1	1
F53H2.3b	WBGene00010006	F53H2.3b	0.476067	0.780021	1.69176	0.267242			22.1904	21.3637	21.4402	22.311	22.1404	21.9711	1	3	3	4	4	3
F49C12.11	WBGene00009880	F49C12.11	0.492667	0.647227	1.43239	0.26718			21.4143	20.5409	20.3957	21.0772	21.2289	21.5228	1	1	1	2	1	1
sams-1	WBGene00008205	C49F5.1	0.474633	0.791802	1.71491	0.267133			25.0474	25.7809	24.9872	25.5524	25.9228	25.7642	13	16	11	13	14	14
R74.8b	WBGene00011282	R74.8b	0.452567	1.09554	2.32998	0.267121			22.9394	22.3755	22.5324	22.8735	23.1636	23.1679	5	5	4	6	8	8
msh-2	WBGene00003418	H26D21.2	0.4301	1.67431	3.6819	0.266017			21.2467	21.3075	21.1322	21.7653	21.4491	21.7623	1	2	2	4	4	4
rsp-6	WBGene00004703	C33H5.12a	0.819733	0.199487	0.518136	0.265967			18.2994	22.8871	23.1069	22.551	21.8297	22.3719	NA	1	1	1	2	2
pqn-70	WBGene00004152	T19B10.4a	0.4563	0.973683	2.07813	0.265357			24.1178	24.5785	24.7747	24.7603	25.1097	24.9699	5	7	8	8	7	7
ctl-3	WBGene00013220	Y54G11A.13a	0.471567	0.778362	1.6885	0.265032			22.5079	22.6049	22.8725	23.6323	22.7761	22.9916	1	1	2	2	3	3
F43C11.9	WBGene00018386	F43C11.9	0.459767	0.903311	1.9361	0.264618			19.1444	19.1953	18.4632	19.363	19.3728	19.4464	2	2	NA	2	1	2
dli-1	WBGene00001007	C39E9.14b	0.430633	1.40505	3.01515	0.26213			23.5607	23.6836	23.2989	24.1134	23.8973	23.8244	3	9	6	11	10	10
lim-8	WBGene00017904	F28F5.3b	0.802567	0.197444	0.513472	0.262018			19.9824	22.5368	17.5095	19.9822	21.9296	20.5246	NA	2	NA	1	5	1
mek-1	WBGene00003185	K08A8.1b	0.4658	0.748022	1.62902	0.260815			23.9528	22.964	23.4588	23.8907	23.9398	23.9425	6	6	5	7	7	7
F14B4.1	WBGene00008779	F14B4.1	0.560133	0.358009	0.859508	0.260322			18.964	17.6164	18.7542	18.0517	19.74	19.2233	NA	1	NA	1	2	1
pix-1	WBGene00010776	K11E4.4a	0.4698	0.701735	1.5386	0.260228			21.9261	22.4907	21.748	22.3828	22.9337	22.2577	1	5	3	4	9	7
C36E6.1b	WBGene00016489	C36E6.1b	0.445233	0.968231	2.06705	0.259551			22.5169	23.0151	22.9501	23.0135	23.5266	23.2777	3	7	7	9	10	8
dnj-27	WBGene00001045	Y47H9C.5a	0.436233	1.12678	2.39596	0.259343			29.7451	30.0836	30.274	30.2807	30.5393	30.5914	67	82	77	85	85	84
cdh-4	WBGene00000396	F25F2.2a	0.431033	1.21851	2.59347	0.258692			20.3066	20.815	20.4404	20.868	21.0839	20.9032	1	2	3	1	2	2
Y71H2AM.11	WBGene00022176	Y71H2AM.11	0.416333	1.68402	3.70744	0.258224			23.7516	23.5875	23.8782	24.0201	24.1697	24.2765	6	7	10	9	9	8
swsn-2.2	WBGene00015971	C18E3.2	0.4242	1.37461	2.94431	0.258018			24.44	24.896	24.8121	25.0997	25.1143	25.2067	9	15	14	15	16	13
siah-1	WBGene00021369	Y37E11AR.2	0.5714	0.32245	0.785768	0.256557			17.6207	19.5851	17.9712	18.7058	19.7551	18.4303	NA	NA	NA	1	1	1
his-14	WBGene00001888	ZK131.8	0.459467	0.722663	1.57945	0.256556			26.7864	27.3573	27.1933	27.1009	27.8414	27.7731	17	17	17	19	21	21
T12G3.2g	WBGene00011738	T12G3.2g	0.4672	0.651487	1.44068	0.2561			20.7565	20.4448	21.2075	20.9114	21.7177	21.1813	1	1	1	2	4	2
gip-1	WBGene00001589	H04J21.3a	0.4734	0.600202	1.34078	0.255467			20.2367	20.6031	20.9039	21.484	21.1922	20.4877	1	2	1	3	2	1
ZK1073.1	WBGene00014213	ZK1073.1	0.400467	2.29497	5.57605	0.254779			26.957	27.1159	26.8961	27.4166	27.3314	27.4224	21	28	26	29	29	26
lpd-6	WBGene00003062	K09H9.6	0.455367	0.709399	1.55355	0.253953			20.6498	20.5624	21.0069	21.5683	21.3212	20.6957	1	4	1	3	3	3
ZC477.5	WBGene00022620	ZC477.5	0.475167	0.567315	1.2766	0.253799			19.5899	20.7723	20.5808	20.8296	20.6615	20.8774	1	2	2	2	1	2
C05D2.10a	WBGene00015470	C05D2.10a	0.5924	0.285105	0.706828	0.253367			18.9411	20.6775	18.3899	19.4572	20.8821	19.4464	NA	1	NA	1	2	1
M05D6.5b	WBGene00010878	M05D6.5b	0.476267	0.55016	1.24305	0.25291			18.9927	18.3428	19.6618	19.4719	19.4035	19.5507	1	1	1	1	2	2
cas-1	WBGene00000294	F41G4.2b	0.4448	0.790273	1.7119	0.252752			24.0595	24.9283	24.3918	25.0209	24.8317	24.8614	10	11	11	17	18	17
kin-10	WBGene00002196	T01G9.6a	0.404267	1.76478	3.92411	0.25219			23.6139	23.6248	23.3581	23.8507	23.92	24.0389	2	3	3	4	5	3
prp-31	WBGene00022458	Y110A7A.8	0.4968	0.447281	1.04007	0.251206			21.8902	23.3049	22.2041	23.3608	22.6462	22.8826	4	2	3	6	5	6
T08G11.4b	WBGene00011631	T08G11.4b	0.429867	0.935231	2.00025	0.250665			19.9193	20.4911	19.9546	20.3639	20.7427	20.548	1	2	1	2	1	1
ifg-1	WBGene00002066	M110.4b	0.4123	1.31692	2.81231	0.250394			26.1512	26.6527	26.4363	26.8386	26.7863	26.8522	24	30	30	38	39	36
rps-15	WBGene00004484	F36A2.6	0.422167	1.04405	2.22255	0.249811			28.673	29.273	29.0678	29.2933	29.5369	29.4501	25	43	36	39	41	39
ymel-1	WBGene00010842	M03C11.5	0.4163	1.06608	2.26834	0.247279			22.3236	22.4262	22.2459	22.6047	22.5417	23.0982	3	4	4	4	4	6
pgl-1	WBGene00003992	ZK381.4a	0.385	2.54966	6.54271	0.246978		+	25.1537	24.9646	25.0329	25.4714	25.4017	25.4331	12	13	8	18	18	19
Y37E11B.5	WBGene00021377	Y37E11B.5	0.4761	0.483672	1.11232	0.246937			21.7748	22.3538	22.7142	22.1222	23.2253	22.9236	3	2	3	2	3	2
mat-2	WBGene00003133	W10C6.1	0.5284	0.3353	0.812562	0.245734			18.5756	18.1715	20.2778	19.442	19.6952	19.4729	1	NA	1	1	2	2
ZC506.1	WBGene00013919	ZC506.1	0.528933	0.331727	0.805128	0.245222			18.0267	18.2346	20.0271	18.9966	19.58	19.2986	NA	1	NA	1	1	1
aars-2	WBGene00000197	F28H1.3	0.473233	0.477795	1.10069	0.245206			21.0445	22.2421	21.0861	22.2742	21.6954	21.8228	2	5	4	4	5	6
pam-1	WBGene00003914	F49E8.3a	0.395833	1.45695	3.13792	0.243418			26.8933	27.1633	26.8969	27.2025	27.463	27.4755	30	37	36	45	51	49
cdk-9	WBGene00000410	H25P06.2a	0.748133	0.180918	0.475401	0.243399			20.4847	18.5352	18.6695	21.2957	17.0961	21.542	1	NA	NA	1	1	1
C17G10.9a	WBGene00015920	C17G10.9a	0.4105	1.03332	2.20037	0.243395			23.4452	23.7199	23.17	23.7352	24.0497	23.7817	6	8	6	7	9	8
noca-1	WBGene00011647	T09E8.1e	0.465333	0.492426	1.12961	0.243383			21.7502	21.0453	21.0491	21.0699	22.1105	22.0602	3	5	3	3	2	2
cku-80	WBGene00000520	R07E5.8	0.3853	1.95051	4.45458	0.242862			22.6522	22.8151	22.7711	23.123	23.012	23.2593	4	6	6	7	7	8
ostb-1	WBGene00011638	T09A5.11	0.423767	0.786069	1.70364	0.242327			24.2129	23.5691	24.3321	24.4089	24.3656	24.6109	8	8	8	8	10	9
sdz-8	WBGene00008334	C55A6.5	0.388067	1.61525	3.52902	0.241041			22.631	22.5348	22.7485	23.121	23.1132	22.8443	4	6	4	7	7	7
ptp-2	WBGene00004214	F59G1.5	0.4257	0.727847	1.58957	0.240807			24.1254	23.2791	23.847	24.3726	24.0919	24.0641	8	7	9	10	12	10
pges-2	WBGene00011239	R11A8.5	0.392333	1.36404	2.91991	0.240052			21.9333	22.2376	22.197	22.6169	22.6021	22.3259	1	5	6	7	6	6
ruvb-1	WBGene00007784	C27H6.2	0.382233	1.75414	3.89511	0.239175			25.7796	25.8173	25.5154	26.0397	26.1237	26.0956	13	19	17	21	20	20
exos-9	WBGene00018154	F37C12.13a	0.409067	0.895607	1.92068	0.238804			21.627	21.4233	21.3437	21.4949	21.9789	22.1474	1	2	1	3	2	2
bre-1	WBGene00000266	C53B4.7c	0.405433	0.955131	2.04047	0.238673			24.7014	25.1575	24.7616	25.0888	25.547	25.201	8	10	10	12	14	12
deps-1	WBGene00022034	Y65B4BL.2a	0.394	1.2042	2.56226	0.238243		+	28.2733	28.5558	28.4754	28.5957	28.8506	29.0402	38	47	43	49	48	53
imb-1	WBGene00002075	F28B3.8	0.381833	1.67762	3.69061	0.238131			23.4418	23.3581	23.6195	23.8536	23.9752	23.7361	6	5	4	8	9	10
aak-2	WBGene00020142	T01C8.1c	0.401433	0.966303	2.06313	0.236893			21.0941	20.8224	20.8863	20.9949	21.5854	21.4268	1	2	2	3	3	3
otub-1	WBGene00007718	C25D7.8	0.366533	2.81578	7.70304	0.236842			19.2817	19.2834	19.2463	19.7073	19.5504	19.6533	NA	NA	NA	1	1	1
sfa-1	WBGene00013808	Y116A8C.32	0.415533	0.741918	1.61708	0.236506			21.741	22.1467	21.3004	22.2991	22.0346	22.101	3	2	4	3	4	2
Y108G3AL.2	WBGene00022434	Y108G3AL.2	0.684467	0.186361	0.488008	0.235814			19.2854	17.7908	20.6721	17.6777	20.9762	21.1478	NA	1	1	1	1	2
lin-26	WBGene00003012	F18A1.2a	0.406133	0.836405	1.8029	0.235403			23.09	22.3608	22.7983	23.0428	23.3015	23.1232	4	3	3	6	6	5
pnk-1	WBGene00004068	C10G11.5c	0.399967	0.917733	1.96503	0.234785			21.7921	21.434	21.2752	22.1364	21.671	21.8938	2	1	2	3	3	4
cpn-1	WBGene00000777	F43G9.9	0.406533	0.811661	1.75402	0.23475			24.4177	24.5865	24.2428	25.1685	24.4449	24.8532	7	8	7	7	8	9
T05B9.1	WBGene00011464	T05B9.1	0.386767	1.22844	2.6152	0.234704			20.9352	20.862	21.3357	21.4591	21.4182	21.4159	2	2	1	3	5	5
cept-2	WBGene00013024	Y49A3A.1	0.4282	0.573572	1.28882	0.233703			20.5558	19.5995	20.5296	20.776	20.4427	20.7508	1	1	1	1	1	1
hrpf-2	WBGene00022253	Y73B6BL.33a	0.411833	0.713798	1.56214	0.233514			21.2271	21.5478	21.9338	22.2601	21.6838	22.0003	1	3	3	3	2	3
ama-1	WBGene00000123	F36A4.7	0.423733	0.591991	1.32476	0.232839			21.1853	22.066	21.1639	21.6715	22.0732	21.9417	2	1	2	2	5	5
rom-4	WBGene00004403	Y116A8C.16a	0.624933	0.202467	0.524925	0.232272			20.9426	18.8897	16.8369	19.7392	19.4021	19.4027	1	NA	1	2	1	1
T22C1.4	WBGene00011915	T22C1.4	0.431267	0.521713	1.18728	0.231461			18.9494	18.5231	18.9359	18.8991	19.9045	18.8986	1	1	1	1	1	1
kcc-1	WBGene00006504	R13A1.2b	0.450433	0.431822	1.00918	0.231426			18.3259	17.7711	19.2703	18.7312	18.9821	19.0053	NA	NA	1	1	2	1
him-1	WBGene00001860	F28B3.7a	0.3733	1.50467	3.25308	0.231181			24.9658	25.3183	25.2896	25.5667	25.5291	25.5978	13	21	20	22	24	19
sams-4	WBGene00015540	C06E7.3a	0.823233	0.147466	0.396339	0.23014			19.0965	19.4929	23.9712	18.9416	23.0983	22.9904	1	1	1	1	1	1
fecl-1	WBGene00010645	K07G5.6	0.3755	1.30309	2.78107	0.229661			23.2063	23.1638	23.4706	23.8004	23.69	23.4768	5	6	5	7	6	6
tgt-2	WBGene00006567	Y39B6A.35	0.475067	0.344233	0.831088	0.229321			17.8225	18.5245	19.0714	18.2895	19.7901	18.764	NA	NA	NA	NA	1	1
arp-1	WBGene00013168	Y53F4B.22a	0.418833	0.56227	1.26674	0.228791			22.4512	23.1399	22.0849	22.8246	22.9006	23.2073	1	4	4	5	6	8
mrpl-13	WBGene00008769	F13G3.11	0.395	0.781254	1.69418	0.227909			22.6601	23.2078	22.4859	23.1512	23.3372	23.0504	3	4	4	5	4	3
alh-5	WBGene00000111	T08B1.3	0.3655	1.61184	3.5203	0.227892			23.5193	23.8022	23.4723	23.938	23.9732	23.9791	6	9	8	11	9	9
nrde-3	WBGene00019862	R04A9.2	0.4161	0.547705	1.23824	0.226629			20.2094	20.3661	20.531	20.2722	20.7011	21.3815	1	1	1	1	3	2
C30H6.7a	WBGene00007824	C30H6.7a	0.395433	0.727555	1.589	0.22611			20.4842	20.4516	20.6055	20.595	20.742	21.3906	1	2	1	2	2	1
sup-36	WBGene00018164	F38A5.7	0.349067	2.83278	7.78297	0.225955			24.0868	24.2221	24.1174	24.5251	24.4859	24.4625	6	5	5	5	5	5
cyn-15	WBGene00000891	Y87G2A.6	0.358533	1.83757	4.12647	0.225935			24.1781	24.3631	24.3432	24.5291	24.6879	24.743	10	13	9	9	10	13
vet-6	WBGene00006902	F44F1.7	0.369367	1.25616	2.6763	0.225497			20.4574	20.2591	20.1988	20.644	20.885	20.4944	1	2	1	2	2	2
ctps-1	WBGene00012316	W06H3.3	0.3588	1.71829	3.79841	0.225029			28.0738	27.7865	27.8641	28.2056	28.2545	28.3407	39	44	38	55	55	56
Y116F11A.6	WBGene00013819	Y116F11A.6	0.478467	0.306488	0.752232	0.223995			20.5395	20.6895	18.7573	20.4197	20.738	20.264	1	1	NA	2	1	1
uaf-1	WBGene00006697	Y92C3B.2d	0.360533	1.41874	3.04727	0.222783			27.6944	27.5603	27.8366	27.9083	28.0537	28.2109	28	33	31	37	37	36
swsn-4	WBGene00004204	F01G4.1	0.358433	1.47894	3.1907	0.222307			24.2334	24.2931	24.2167	24.3875	24.6959	24.7351	7	11	11	15	14	17
tomm-22	WBGene00021133	W10D9.5	0.546167	0.22093	0.566592	0.221663			23.8306	22.8264	20.5732	23.0302	22.9481	22.8904	2	2	2	3	2	3
pfs-2	WBGene00011051	R06A4.9b	0.348433	2.05088	4.76163	0.221484			22.8477	22.9662	22.859	23.2738	23.1178	23.3266	4	7	6	6	4	5
sap-49	WBGene00004723	C08B11.5	0.375533	0.894939	1.91934	0.221468			21.2593	21.4194	21.7986	21.9949	21.6431	21.9659	2	3	3	2	4	2
klp-7	WBGene00002219	K11D9.1b	0.377567	0.8424	1.81477	0.221051			24.8839	25.5135	25.495	25.6391	25.6701	25.7159	11	17	18	20	21	21
R05D7.4	WBGene00011029	R05D7.4	0.345133	2.18305	5.19008	0.220322			20.3595	20.5502	20.4932	20.8811	20.7651	20.7921	1	1	2	3	2	3
mml-1	WBGene00003378	T20B12.6b	0.427133	0.411058	0.967462	0.220002			18.4847	19.1772	19.5803	19.2111	19.1962	20.1163	NA	NA	1	1	1	1
unc-97	WBGene00006826	F14D12.2	0.370533	0.938519	2.00689	0.219949			22.1534	22.0105	21.8678	22.7115	22.2168	22.215	2	2	2	4	3	3
evl-18	WBGene00009372	F34D10.2	0.456567	0.322056	0.784944	0.219329			18.0849	17.7942	19.5896	18.623	19.0184	19.197	NA	NA	NA	1	1	1
F14B4.2b	WBGene00008780	F14B4.2b	0.5284	0.222687	0.570525	0.217792			20.2821	17.6525	20.2994	19.3983	20.3929	20.028	1	NA	1	1	1	2
isp-1	WBGene00002162	F42G8.12	0.348633	1.55439	3.37554	0.21745			26.7577	26.4878	26.471	26.8636	26.8889	27.0099	14	14	14	16	14	13
D2013.6	WBGene00008404	D2013.6	0.493067	0.253091	0.637685	0.216903			17.0241	19.0412	19.4237	19.1779	18.5715	19.2188	NA	1	1	1	1	NA
alh-8	WBGene00000114	F13D12.4a	0.359333	1.05666	2.24873	0.216493			20.2005	20.3082	19.9458	20.3446	20.7397	20.4482	3	3	1	1	3	2
nex-2	WBGene00003589	T07C4.9a	0.359967	1.03086	2.19528	0.21633			26.0827	26.4824	26.1576	26.4376	26.8071	26.5579	19	18	18	18	21	15
glrx-3	WBGene00017062	D2063.3a	0.3472	1.40126	3.00628	0.214919			24.1005	23.9288	23.7183	24.3297	24.2234	24.2361	4	7	6	9	9	11
Y69A2AR.16d	WBGene00022087	Y69A2AR.16d	0.514267	0.223138	0.571533	0.214295			16.3493	19.3679	18.4346	18.7787	18.3801	18.5358	NA	NA	NA	NA	1	1
cas-2	WBGene00015975	C18E3.6a	0.3422	1.48399	3.2029	0.212964			22.6825	22.9023	22.6947	23.0351	23.2605	23.0105	3	3	4	5	4	4
rpc-2	WBGene00017300	F09F7.3	0.451333	0.293737	0.725227	0.212659			18.5986	17.295	17.9145	17.4588	18.5516	19.1517	NA	NA	NA	NA	1	2
nhr-39	WBGene00018404	F44A2.4	0.335467	1.90406	4.31747	0.21263			20.4217	20.2703	20.4163	20.7521	20.5861	20.7765	1	1	1	1	1	1
nsf-1	WBGene00003818	H15N14.2b	0.3547	0.975728	2.08229	0.212352			21.5211	21.7372	21.6572	22.166	22.1364	21.6772	5	4	3	5	2	3
tbcd-1	WBGene00008887	F16D3.4	0.4766	0.24849	0.627622	0.210943			17.0432	18.8006	19.207	19.0276	19.3406	18.1124	NA	1	1	2	1	1
npp-7	WBGene00003793	T19B4.2	0.357733	0.842319	1.81461	0.210786			26.4634	25.8061	26.1382	26.5353	26.5581	26.3875	20	26	24	31	29	26
Y71H2AM.20a	WBGene00022185	Y71H2AM.20a	0.3847	0.518652	1.18126	0.210717			20.6504	19.7102	20.2742	20.3448	20.9384	20.5057	1	1	2	3	2	2
rga-4	WBGene00022286	Y75B7AL.4a	0.350433	0.975551	2.08193	0.210052			21.3358	21.3696	21.0354	21.5597	21.84	21.3924	2	1	1	4	4	6
mrpl-23	WBGene00020348	T08B2.8	0.369433	0.643024	1.4242	0.209977			22.3462	22.9961	22.8259	23.4228	22.8475	23.0062	5	6	4	5	3	5
snfc-5	WBGene00011111	R07E5.3	0.355933	0.825198	1.78074	0.209387			23.4963	23.9551	23.8991	24.4087	24.058	23.9516	5	7	6	7	9	10
T24B1.1	WBGene00011975	T24B1.1	0.446667	0.282858	0.702023	0.209088			17.7941	19.5391	19.802	19.6637	19.3694	19.4421	NA	2	1	2	1	2
K04B12.2b	WBGene00010550	K04B12.2b	0.3651	0.663464	1.46401	0.208702			19.3856	19.3129	19.8204	19.7064	20.2553	19.6525	1	2	1	2	1	1
F53F8.5	WBGene00010002	F53F8.5	0.414567	0.344561	0.831765	0.207447			19.6925	18.352	18.338	19.0048	18.9809	19.6405	1	1	NA	2	3	2
let-711	WBGene00002845	F57B9.2	0.323567	2.24568	5.40331	0.20743			25.4078	25.3386	25.4689	25.7265	25.8104	25.6491	16	23	20	31	35	32
hpl-2	WBGene00001996	K01G5.2a	0.332433	1.49087	3.21954	0.207349			24.0558	23.7632	24.0645	24.3508	24.2541	24.2759	3	3	3	3	4	4
rpt-1	WBGene00004501	C52E4.4	0.335967	1.24505	2.65172	0.206533			27.7222	28.133	28.0129	28.2985	28.2295	28.348	42	49	44	46	49	46
F47D12.9a	WBGene00018564	F47D12.9a	0.342367	1.00821	2.14868	0.206327			20.5901	21.0955	20.8993	21.3117	21.2006	21.0997	2	1	1	2	2	3
cids-1	WBGene00015347	C02F5.4	0.336067	1.1901	2.53166	0.205829			22.545	22.303	22.695	22.7495	22.979	22.8227	2	5	5	6	6	6
B0513.2a	WBGene00007195	B0513.2a	0.3572	0.664031	1.46511	0.20484			24.1478	23.399	23.9804	24.3756	24.1367	24.0865	4	5	6	9	8	7
F38E9.5	WBGene00018187	F38E9.5	0.342	0.94281	2.01555	0.20483			26.7679	27.2451	27.2918	27.4353	27.4002	27.4953	15	19	18	21	30	27
glh-1	WBGene00001598	T21G5.3	0.323367	1.81043	4.05022	0.204683		+	27.2332	27.0819	27.2311	27.5933	27.3853	27.5377	35	40	38	46	42	43
ostd-1	WBGene00019693	M01A10.3	0.334133	1.08634	2.31068	0.20317			24.3854	23.9859	24.3161	24.4284	24.5714	24.69	6	9	7	10	10	7
hel-1	WBGene00001840	C26D10.2a	0.320833	1.53407	3.32517	0.200962			26.2212	26.0123	26.0478	26.5579	26.3487	26.3372	19	25	21	27	25	22
adr-1	WBGene00000079	H15N14.1e	0.332733	0.99257	2.11665	0.200781			23.034	22.9311	23.3376	23.2791	23.4034	23.6184	3	3	3	3	3	3
tag-174	WBGene00006519	F54D8.2	0.316967	1.61115	3.51855	0.19934			25.574	25.5301	25.5356	25.8797	25.7019	26.009	5	6	6	8	7	6
mcm-4	WBGene00003156	Y39G10AR.14a	0.312533	2.00034	4.60514	0.199337			27.7478	27.939	27.9304	28.2141	28.2093	28.1314	40	53	46	58	62	53
lin-38	WBGene00013006	Y48E1B.7	0.368767	0.450824	1.04713	0.1991			20.7403	21.0765	20.8896	21.8936	20.7296	21.1895	1	3	2	3	3	4
F52D10.2	WBGene00009930	F52D10.2	0.334067	0.843024	1.81601	0.198382			19.0984	19.4466	19.5913	19.5345	19.9181	19.6859	1	1	1	1	1	1
hmg-4	WBGene00001974	T20B12.8	0.3833	0.370725	0.885588	0.198311			21.3647	20.2004	21.1193	20.7844	21.5749	21.475	1	3	1	4	5	4
ash-2	WBGene00012458	Y17G7B.2c	0.328933	0.968404	2.0674	0.19826			22.4918	22.6354	22.8783	22.7863	23.1689	23.0371	4	6	5	5	8	8
cct-4	WBGene00000379	K01C8.10	0.3586	0.493926	1.13257	0.197399			24.4744	25.3326	24.3263	24.9979	25.1469	25.0643	9	16	11	18	18	18
ZK822.2	WBGene00014090	ZK822.2	0.357367	0.498976	1.14253	0.197137			24.5681	23.5289	24.2246	24.332	24.5309	24.5308	4	6	7	8	8	6
sec-24.1	WBGene00004755	F12F6.6	0.3292	0.830537	1.79129	0.195513			23.081	23.265	22.6702	23.2582	23.4377	23.3079	3	10	6	9	12	13
K04G7.1	WBGene00019400	K04G7.1	0.431267	0.24031	0.609643	0.195372			18.8713	19.2078	19.5968	18.3212	20.5033	20.1452	NA	NA	NA	1	1	1
eef-1A.2	WBGene00001169	R03G5.1a	0.342367	0.60075	1.34184	0.195064			32.3277	33.1984	32.7246	33.0137	33.1567	33.1074	76	124	110	127	140	146
tag-256	WBGene00014023	ZK637.3	0.4124	0.266147	0.666062	0.194605			18.569	18.0827	17.9336	17.5374	19.5678	18.7173	NA	NA	NA	NA	1	1
ZK1067.2a	WBGene00014208	ZK1067.2a	0.416233	0.254036	0.639749	0.193541			18.6516	20.7512	20.3431	20.2901	20.5234	20.1811	NA	1	2	1	2	2
ucr-2.1	WBGene00012158	VW06B3R.1a	0.354267	0.449463	1.04442	0.19262			27.3575	28.3033	28.3792	28.2016	28.4724	28.4288	20	21	20	23	25	23
asc-1	WBGene00000208	Y53F4B.15	0.307167	1.43093	3.07605	0.191996			21.5809	21.6123	21.7764	22.0939	21.9772	21.82	4	3	3	1	3	1
F56F11.4a	WBGene00018991	F56F11.4a	0.3248	0.758455	1.64945	0.191406			23.9544	24.1415	23.4854	24.2337	24.179	24.143	4	5	4	4	5	5
pgl-3	WBGene00003994	C18G1.4a	0.3196	0.873865	1.87728	0.191349		+	24.2186	23.7508	24.2283	24.3547	24.2925	24.5093	6	7	5	12	13	13
cogc-6	WBGene00019481	K07C11.9	0.302733	1.45001	3.12135	0.189565			20.3626	20.3776	20.0958	20.6454	20.546	20.5528	2	2	1	2	2	2
lin-66	WBGene00001562	B0513.1a	0.303233	1.31741	2.81341	0.188604			23.7632	23.5006	23.7386	23.835	24.0363	24.0408	5	5	6	9	10	11
fcd-2	WBGene00012767	Y41E3.9b	0.375067	0.313744	0.767512	0.188601			18.0897	18.2208	19.5309	18.7182	19.2866	18.9618	NA	NA	NA	1	1	1
Y43F8C.7	WBGene00012829	Y43F8C.7	0.326933	0.60724	1.35449	0.187745			21.9653	21.4112	21.5531	22.217	21.6317	22.0617	2	2	2	2	2	2
unc-61	WBGene00006795	Y50E8A.4b	0.299533	1.42944	3.07252	0.187503			29.6947	29.888	29.8507	29.9573	30.1685	30.2062	60	76	68	74	70	73
E01A2.1a	WBGene00017084	E01A2.1a	0.3537	0.385147	0.915005	0.187485			25.2457	26.5552	25.8667	26.1473	26.4018	26.1796	13	18	14	16	17	17
tbc-1	WBGene00008974	F20D1.2	0.334667	0.514948	1.17398	0.187481			23.1855	22.9985	23.2227	23.9562	23.4558	22.9987	2	4	3	6	5	4
Y47G6A.18	WBGene00021644	Y47G6A.18	0.357367	0.366633	0.877211	0.187359			22.4648	21.1439	21.6415	22.3694	22.0138	21.9391	1	4	4	2	5	5
div-1	WBGene00001002	R01H10.1	0.2892	2.44937	6.14654	0.186936			23.7644	23.8218	23.7383	23.9839	24.1049	24.1033	6	12	11	11	10	10
R07E4.1b	WBGene00019935	R07E4.1b	0.318367	0.704985	1.54494	0.186608			23.0838	22.4104	22.5859	22.9414	23.0062	23.0876	1	2	1	1	1	1
Y69A2AR.18a	WBGene00022089	Y69A2AR.18a	0.3002	1.14092	2.42604	0.184882			28.2234	28.5857	28.3455	28.5974	28.6502	28.8076	39	44	40	42	41	39
unc-59	WBGene00006793	W09C5.2	0.2887	1.91949	4.36268	0.184334			29.3884	29.3144	29.4529	29.663	29.5886	29.7702	47	64	62	68	69	71
F27D4.1	WBGene00009187	F27D4.1	0.316067	0.639815	1.41795	0.18345			22.9114	23.1916	22.48	23.3416	23.1108	23.0788	3	7	3	6	5	6
ubh-4	WBGene00006724	C08B11.7	0.289733	1.58077	3.44157	0.182891			25.6873	25.9135	25.787	26.19	26.0178	26.0492	11	17	15	18	18	17
F02E9.10b	WBGene00008533	F02E9.10b	0.299967	0.998814	2.12942	0.18281			22.3371	21.9511	21.995	22.4959	22.2591	22.4281	2	5	3	3	4	3
F25H5.5a	WBGene00009127	F25H5.5a	0.521033	0.142243	0.383728	0.182319			18.3716	22.3145	22.4619	21.9956	21.4685	21.247	NA	3	3	3	3	2
mep-1	WBGene00003218	M04B2.1	0.302667	0.815157	1.76091	0.181034			24.9282	25.3996	25.4274	25.6686	25.5095	25.4851	17	18	16	19	19	20
K09H9.2	WBGene00019595	K09H9.2	0.3043	0.767844	1.66786	0.180867			20.3727	20.5144	20.2286	20.773	20.3587	20.8969	2	2	2	2	2	2
unc-73	WBGene00006805	F55C7.7i	0.334233	0.3906	0.926085	0.179607			22.039	21.0747	21.2209	21.385	22.0409	21.9114	2	3	2	6	9	9
nduo-1	WBGene00010959	MTCE.11	0.316133	0.494311	1.13333	0.177709			21.1459	20.2116	20.6062	21.0914	20.9605	20.8602	1	2	1	1	1	2
W02B12.15a	WBGene00044026	W02B12.15a	0.306533	0.607236	1.35449	0.177566			25.2438	24.5165	25.1224	25.2206	25.2767	25.305	8	9	10	8	9	10
sqv-4	WBGene00005022	F29F11.1	0.2883	1.06601	2.26819	0.177186			26.0392	25.8138	25.7716	26.3542	26.0876	26.0477	17	23	20	23	21	21
fut-3	WBGene00006402	F59E12.13	0.304867	0.593139	1.327	0.17625			19.5693	19.234	19.1199	19.3405	19.9683	19.529	1	1	1	1	1	1
W03F9.1	WBGene00020999	W03F9.1	0.3158	0.465068	1.07546	0.176066			23.3195	22.4272	23.1245	23.0876	23.4789	23.2521	4	4	6	3	6	5
cfim-1	WBGene00009668	F43G9.5	0.300267	0.650061	1.43791	0.175716			23.2004	22.6891	23.2194	23.3052	23.1533	23.5512	3	2	2	4	5	3
rap-1	WBGene00004307	C27B7.8	0.3526	0.275442	0.686113	0.175082			19.8949	18.4902	19.7896	19.2868	20.1255	19.8202	1	1	1	1	1	1
Y38A10A.7	WBGene00021392	Y38A10A.7	0.303033	0.584295	1.30975	0.175025			22.4975	22.3601	21.855	22.7831	22.3745	22.4641	4	3	2	4	5	5
C44E4.1a	WBGene00016650	C44E4.1a	0.315533	0.437264	1.02006	0.174393			19.9657	20.3988	20.8551	20.4913	21.0595	20.6154	NA	1	2	1	5	5
F33A8.4	WBGene00009352	F33A8.4	0.307067	0.516171	1.17639	0.174368			17.6056	17.6006	18.3581	18.1659	18.2797	18.0399	NA	NA	NA	NA	1	1
rde-10	WBGene00021634	Y47G6A.4	0.274433	1.48175	3.19747	0.173054			23.3735	23.4618	23.6613	23.7687	23.757	23.7942	6	5	5	6	6	6
lin-52	WBGene00003035	ZK632.13a	0.323867	0.3603	0.864217	0.172752			22.483	21.3877	21.5325	22.0083	22.4222	21.9443	3	4	4	5	4	4
R05D3.9	WBGene00019882	R05D3.9	0.269967	1.89368	4.28726	0.172727			28.4447	28.5032	28.6031	28.872	28.7369	28.752	49	58	56	59	60	55
vars-2	WBGene00006936	Y87G2A.5	0.272967	1.5529	3.37183	0.172659			27.6767	27.473	27.6583	27.8262	27.8287	27.972	39	47	46	57	58	53
acdh-7	WBGene00020812	T25G12.5	0.278033	1.08331	2.30433	0.171556			25.4906	25.4416	25.4441	25.976	25.6166	25.6178	15	12	11	17	14	13
swsn-6	WBGene00022774	ZK616.4	0.289233	0.705377	1.5457	0.171436			23.8561	24.5021	24.1371	24.4414	24.4609	24.4607	5	9	7	10	14	13
F11A3.2b	WBGene00008670	F11A3.2b	0.301167	0.511128	1.16647	0.171294			19.6016	19.1376	18.8429	19.2284	19.6113	19.6459	1	1	1	1	1	1
F10B5.8	WBGene00008642	F10B5.8	0.2955	0.567378	1.27672	0.170666			23.3067	22.9049	23.4126	23.3052	23.8466	23.3589	3	5	4	6	5	7
crn-1	WBGene00000794	Y47G6A.8	0.278333	0.991479	2.11442	0.170585			25.8237	25.3856	25.6061	25.8674	25.8298	25.9532	11	15	13	16	18	14
sec-31	WBGene00011338	T01G1.3	0.298367	0.499828	1.14422	0.169453			25.4322	25.9627	25.8339	25.6303	26.2739	26.2197	14	29	23	31	38	36
tftc-3	WBGene00014114	ZK856.13	0.277233	0.936611	2.00304	0.169209			23.228	23.4869	23.4578	23.5329	23.582	23.8895	1	1	2	1	1	2
ndc-80	WBGene00003576	W01B6.9	0.276933	0.935392	2.00058	0.169024			23.8732	24.0765	23.6631	24.01	24.1944	24.2392	6	10	9	13	12	9
par-5	WBGene00003920	M117.2a	0.2762	0.958792	2.04789	0.168943			27.962	28.3361	27.9359	28.2788	28.4051	28.3787	23	29	28	29	32	32
apc-17	WBGene00007501	C09H10.7	0.327033	0.305146	0.749399	0.168888			18.511	19.7734	19.174	19.1424	19.9438	19.3533	NA	NA	NA	1	1	NA
R07H5.8	WBGene00011128	R07H5.8	0.271467	1.1543	2.45461	0.168551			26.1071	26.292	26.1917	26.2845	26.5078	26.6129	17	25	20	24	25	25
srpa-68	WBGene00010097	F55C5.8	0.277733	0.851818	1.83345	0.168172			24.1865	24.5347	24.0445	24.6138	24.4746	24.5105	9	12	12	13	13	11
F55A3.3	WBGene00018849	F55A3.3	0.391867	0.179408	0.471892	0.168153			17.0617	19.5933	19.4128	18.9592	18.8916	19.3926	NA	1	1	1	1	1
mrps-22	WBGene00007564	C14A4.14	0.275433	0.928058	1.9858	0.16808			24.2628	24.6421	24.6205	24.8531	24.8428	24.6558	8	9	10	12	14	11
rpb-5	WBGene00019246	H27M09.2	0.271667	1.0776	2.29238	0.16785			24.9104	25.1754	25.2241	25.3236	25.5086	25.2927	8	12	13	10	14	12
ifp-1	WBGene00002067	C43C3.1	0.477567	0.130172	0.35428	0.167685			17.6295	21.7558	19.1968	18.984	21.0907	19.9401	NA	4	NA	NA	2	1
T22F3.3a	WBGene00020696	T22F3.3a	0.299	0.447965	1.04143	0.16731			24.2424	24.5768	23.6469	24.3124	24.4238	24.6269	4	14	5	12	16	16
glh-3	WBGene00001600	B0414.6	0.282367	0.679793	1.49582	0.167203		+	21.7115	21.7767	22.2357	22.0362	22.3538	22.181	3	3	3	5	4	4
dlg-1	WBGene00001006	C25F6.2a	0.2779	0.719264	1.57281	0.165743			25.4358	25.7603	25.2843	25.6337	25.9827	25.6977	12	25	12	23	28	27
cope-1	WBGene00009732	F45G2.4	0.256733	1.83417	4.11686	0.164324			25.6688	25.581	25.564	25.9671	25.7978	25.8191	9	11	10	11	15	13
acn-1	WBGene00000039	C42D8.5a	0.2896	0.478588	1.10226	0.16429			22.121	22.2199	21.694	22.0542	22.7132	22.1363	4	7	3	5	5	5
aco-2	WBGene00000041	F54H12.1a	0.301767	0.375758	0.895874	0.164286			23.7185	24.1789	23.0305	23.8523	23.9901	23.9908	7	11	6	9	10	10
rpt-4	WBGene00004504	F23F1.8b	0.264633	1.10362	2.347	0.164088			27.5099	27.4725	27.3761	27.5198	27.7525	27.8801	26	32	29	38	35	36
hum-2	WBGene00002036	F36D4.3a	0.5448	0.107493	0.297717	0.163607			18.6672	21.895	18.5286	19.6365	23.0228	18.0659	1	6	NA	1	6	NA
pri-1	WBGene00004180	F58A4.4a	0.29	0.459333	1.06406	0.163607			22.9658	22.1098	22.498	23.0268	22.7814	22.6354	2	3	3	6	5	5
Y67H2A.5	WBGene00013463	Y67H2A.5	0.298567	0.378925	0.902334	0.163073			24.5435	23.6534	24.2289	24.8311	24.1438	24.3466	3	2	4	4	4	4
ZK863.4	WBGene00014124	ZK863.4	0.279967	0.568287	1.27849	0.162868			25.0955	24.7344	25.1881	24.9598	25.5303	25.3678	12	19	16	19	21	21
sdha-2	WBGene00016392	C34B2.7	0.253933	1.82171	4.08181	0.162547			30.084	29.9098	29.9506	30.1736	30.2452	30.2874	58	73	67	75	71	71
cyn-16	WBGene00000892	Y17G7B.9	0.339733	0.224592	0.57478	0.162469			18.4811	20.1845	20.3055	20.0347	20.0567	19.8989	1	1	1	1	2	2
sdha-1	WBGene00015391	C03G5.1	0.249667	2.41412	6.0122	0.161961			28.6397	28.6316	28.7474	28.8898	28.9527	28.9252	30	35	30	35	37	34
F32D1.5	WBGene00017984	F32D1.5	0.2833	0.485598	1.11613	0.161533			23.7886	24.3731	23.5306	24.1931	24.2572	24.0919	6	13	10	11	9	10
fnta-1	WBGene00019823	R02D3.5	0.267233	0.753856	1.64045	0.160703			19.9428	20.023	19.6838	20.2523	19.8985	20.3005	1	3	1	2	1	1
B0336.3	WBGene00015143	B0336.3	0.2713	0.645758	1.42953	0.160553			24.3659	24.2081	24.8256	24.6941	24.6989	24.8205	9	6	9	8	11	11
mrpl-53	WBGene00008459	E02H1.8	0.318567	0.260052	0.652848	0.160248			20.1602	18.7937	18.9768	19.3719	20.0958	19.4187	NA	NA	1	1	1	1
pash-1	WBGene00011908	T22A3.5a	0.282033	0.460664	1.06671	0.159847			20.0538	20.2665	20.4952	21.0126	20.3807	20.2683	1	2	2	2	1	1
npl-4.1	WBGene00019120	F59E12.4a	0.303433	0.311001	0.761743	0.159841			22.4561	23.7136	23.4953	23.3445	23.6244	23.6064	3	6	5	6	6	6
Y71H2AM.2	WBGene00022167	Y71H2AM.2	0.2573	1.01997	2.17283	0.158983			20.5067	20.6117	20.4385	20.6161	20.733	20.9797	1	1	1	1	1	2
act-2	WBGene00000064	T04C12.5	0.410367	0.140085	0.378494	0.158798			29.5052	31.8041	29.4995	29.4346	32.0755	30.5298	47	84	52	59	80	65
sin-3	WBGene00004117	F02E9.4a	0.267633	0.641748	1.42172	0.158527			22.3137	22.7533	22.4908	23.0169	22.5388	22.805	3	7	4	7	4	6
wdfy-2	WBGene00008402	D2013.2	0.263567	0.739536	1.61242	0.158445			26.7383	27.1878	27.14	27.132	27.4013	27.3235	20	22	18	24	26	24
ZK829.7	WBGene00014096	ZK829.7	0.2783	0.467414	1.08011	0.158336			19.3616	18.7264	18.6289	19.2957	18.9506	19.3055	NA	NA	NA	2	1	2
spr-5	WBGene00005010	Y40B1B.6	0.285933	0.393059	0.931075	0.158228			20.8845	21.7431	21.0593	21.218	21.7679	21.5588	1	3	2	2	3	3
F36A2.7	WBGene00009454	F36A2.7	0.282333	0.413558	0.972499	0.1577			23.1747	22.423	23.1878	23.0747	23.0615	23.4963	1	2	1	3	2	3
ctb-1	WBGene00000829	MTCE.21	0.279133	0.443295	1.03211	0.157663			22.8623	21.94	22.2716	22.6742	22.6304	22.6067	3	3	3	2	2	2
copz-1	WBGene00010333	F59E10.3	0.2462	1.76582	3.92696	0.157548			22.3022	22.3847	22.3272	22.6992	22.5173	22.5362	1	1	1	2	2	2
cyn-13	WBGene00000889	Y116A8C.34a	0.2427	2.1516	5.08553	0.156811			23.8529	23.9216	23.8492	24.1333	24.0387	24.1798	8	10	8	8	8	7
cand-1	WBGene00013606	Y102A5A.1	0.2425	2.0553	4.77551	0.156373			26.1766	26.1925	26.2156	26.3774	26.5356	26.3992	31	34	33	39	37	40
ppt-1	WBGene00004092	F44C4.5	0.256433	0.832842	1.79585	0.156096			28.2692	28.2573	28.444	28.8365	28.4812	28.4221	36	39	35	39	37	35
uba-2	WBGene00006700	W02A11.4	0.2546	0.803139	1.73722	0.154626			24.7421	24.9904	24.5615	24.911	24.9771	25.1697	8	17	9	17	19	15
clec-91	WBGene00014117	ZK858.3	0.349233	0.173655	0.458472	0.15441			22.684	24.8116	22.6466	23.564	24.2421	23.3838	5	6	5	5	7	7
cra-1	WBGene00020068	R13F6.10	0.275933	0.400248	0.945636	0.153998			23.6262	22.7851	23.6162	23.6008	23.7761	23.4784	6	7	8	9	11	10
clpf-1	WBGene00010304	F59A2.4a	0.237833	2.03732	4.71928	0.153402			23.2755	23.2084	23.1535	23.5158	23.4434	23.3917	6	6	7	7	6	6
Y66D12A.10	WBGene00013436	Y66D12A.10	0.253067	0.772209	1.67642	0.153285			22.2449	21.8967	22.0965	22.1132	22.4843	22.3998	3	3	3	2	3	3
cls-2	WBGene00000549	R107.6a	0.2466	1.02273	2.17853	0.152864			24.1261	23.7599	24.0558	24.1981	24.2356	24.2479	13	13	11	12	15	19
copb-1	WBGene00021292	Y25C1A.5	0.251033	0.798373	1.72784	0.152577			26.1129	25.6272	25.8652	26.0753	26.1952	26.0879	18	19	19	23	25	28
H14E04.2a	WBGene00019199	H14E04.2a	0.255733	0.63082	1.40043	0.151986			23.2139	22.9168	22.583	23.1476	23.1839	23.1494	5	7	6	6	5	6
pfn-1	WBGene00003989	Y18D10A.20	0.255533	0.609976	1.35983	0.15139			27.0424	26.7544	26.6395	27.2939	26.7981	27.1109	15	14	16	17	16	16
dhp-1	WBGene00000963	R06C7.3	0.3037	0.230036	0.586904	0.150536			20.0739	20.4156	18.8184	20.0026	20.4119	19.8045	1	1	NA	2	2	1
F53F4.11	WBGene00009993	F53F4.11	0.2923	0.262717	0.658634	0.150376			19.6624	19.5557	19.504	20.7225	19.6242	19.2523	1	2	1	1	1	1
akt-1	WBGene00000102	C12D8.10a	0.241367	1.04051	2.21523	0.150014			24.2349	24.5935	24.3245	24.6558	24.6004	24.6208	11	16	14	17	19	14
mcm-3	WBGene00003155	C25D7.6	0.236433	1.42866	3.07068	0.149926			30.0432	29.8852	29.994	30.3193	30.1074	30.205	98	108	104	119	117	109
F56A11.5a	WBGene00018925	F56A11.5a	0.2606	0.465791	1.07689	0.149599			23.9304	23.1126	23.3999	23.7532	23.7945	23.677	5	4	4	5	6	7
F58D5.5	WBGene00010244	F58D5.5	0.3164	0.195326	0.508625	0.1491			19.4241	20.6044	21.464	20.4377	20.9252	21.0788	NA	1	1	1	1	1
ndx-7	WBGene00003584	C43E11.7	0.341933	0.15881	0.423472	0.148186			18.6539	21.0987	21.0139	20.6063	20.7669	20.4191	NA	1	1	2	1	1
T20F5.6	WBGene00020628	T20F5.6	0.233433	1.26108	2.68719	0.147103			24.3138	24.2315	24.3283	24.4178	24.4715	24.6846	11	13	8	14	14	12
hpo-21	WBGene00012550	Y37D8A.10	0.265133	0.350193	0.843406	0.14613			22.2563	21.3511	21.9863	22.0704	21.8803	22.4384	2	3	2	2	2	3
W04A4.5	WBGene00012234	W04A4.5	0.286867	0.241075	0.61133	0.145673			19.4064	18.3963	18.5677	18.9444	19.7393	18.5473	1	1	1	1	NA	1
C26F1.3	WBGene00016148	C26F1.3	0.239467	0.737772	1.60897	0.145234			19.2709	19.4241	19.7425	19.7045	19.6339	19.8175	NA	1	1	1	1	1
dnj-13	WBGene00001031	F54D5.8	0.2545	0.402764	0.950723	0.143973			23.3229	24.2159	23.6051	23.9123	23.9328	24.0623	4	6	7	8	9	6
rpl-1	WBGene00004412	Y71F9AL.13a	0.247033	0.492317	1.1294	0.14373			27.8737	28.608	28.2401	28.508	28.3857	28.5692	20	26	26	26	28	27
abtm-1	WBGene00022281	Y74C10AR.3a	0.3394	0.14354	0.386866	0.142767			18.9332	20.2736	20.5582	18.8376	21.1632	20.7824	NA	1	1	NA	2	2
T05E8.3	WBGene00020263	T05E8.3	0.240767	0.571109	1.28401	0.142676			19.0943	19.1527	19.1616	19.7438	19.2503	19.1368	NA	NA	NA	1	1	1
dyci-1	WBGene00015927	C17H12.1	0.231467	0.85135	1.83252	0.142326			24.9294	25.221	24.7993	25.2466	25.1771	25.2204	11	15	13	14	14	13
lin-10	WBGene00002999	C09H6.2c	0.2501	0.400103	0.945342	0.141735			18.8814	18.7072	18.2123	18.6369	19.1923	18.722	NA	NA	NA	2	1	1
ubc-14	WBGene00006709	Y87G2A.9	0.3368	0.142077	0.383327	0.141595			18.3882	20.6107	21.2999	20.412	20.4571	20.4401	NA	2	1	2	1	2
gpb-1	WBGene00001679	F13D12.7a	0.2294	0.870658	1.87089	0.141377			25.4132	25.5977	25.3336	25.5449	25.6275	25.8603	8	7	10	8	10	11
stim-1	WBGene00021910	Y55B1BM.1b	0.250233	0.374083	0.892452	0.14055			20.134	21.027	20.7891	20.7453	21.0408	20.9147	1	2	2	1	2	2
goa-1	WBGene00001648	C26C6.2	0.246433	0.39555	0.936125	0.139761			23.8824	23.0823	23.4463	23.5122	23.9457	23.6924	2	3	3	4	4	5
rpn-2	WBGene00004459	C23G10.4b	0.2317	0.634621	1.40784	0.139194			25.5048	25.1153	25.3846	25.338	25.7287	25.6331	14	19	14	18	21	19
csk-1	WBGene00000812	Y48G1C.2a	0.250567	0.340727	0.823826	0.138884			22.5404	22.9902	23.2261	22.7718	23.5621	23.1745	2	6	5	5	5	5
T04A8.7a	WBGene00011409	T04A8.7a	0.218167	1.40432	3.01344	0.138748			26.5104	26.607	26.5382	26.7641	26.658	26.888	25	33	28	31	33	31
cps-6	WBGene00000787	C41D11.8	0.226267	0.733176	1.59999	0.137848			23.3586	23.1207	23.0869	23.1984	23.577	23.4696	4	3	4	4	2	4
lev-11	WBGene00002978	Y105E8B.1e	0.461433	0.0884098	0.248739	0.137532			17.5678	22.0567	20.9865	18.5671	22.9493	20.4789	NA	3	1	NA	4	1
ppw-2	WBGene00004094	Y110A7A.18	0.226867	0.688682	1.51315	0.137501			26.0182	26.2827	26.2314	26.1554	26.5648	26.4927	22	27	24	27	29	32
ima-3	WBGene00002074	F32E10.4	0.227067	0.676451	1.48931	0.137411			25.1421	24.7078	25.0372	25.341	25.0797	25.1476	5	8	8	10	8	10
mrpl-19	WBGene00022470	Y119C1B.4	0.243867	0.371727	0.887637	0.13741			22.1969	22.9478	23.065	22.9812	23.0477	22.9124	3	4	4	5	5	5
K07H8.10	WBGene00019510	K07H8.10	0.221033	0.861874	1.85342	0.136503			25.2552	25.2583	25.3706	25.7394	25.3752	25.4326	12	16	14	15	16	17
arrd-25	WBGene00007296	C04C11.2	0.2648	0.23632	0.600834	0.136444			20.9071	22.1253	21.7825	22.3554	21.7327	21.5212	1	2	2	3	3	4
F17C11.4a	WBGene00008915	F17C11.4a	0.2553	0.270168	0.674752	0.135916			21.3128	20.6115	21.7258	21.7387	21.0962	21.5811	3	2	2	2	2	2
C17E7.9b	WBGene00015903	C17E7.9b	0.232767	0.472485	1.09017	0.135842			19.8969	19.2846	19.7228	19.983	19.9748	19.6448	1	1	1	1	2	1
pme-2	WBGene00004050	E02H1.4	0.227	0.541539	1.22617	0.134708			21.589	20.9999	21.4276	21.4677	21.5608	21.669	1	3	3	2	4	3
C01G6.3	WBGene00007225	C01G6.3	0.2285	0.499442	1.14345	0.134425			21.8134	22.362	22.3555	22.4672	22.508	22.2412	3	6	4	4	3	3
pkn-1	WBGene00009793	F46F6.2a	0.222567	0.645469	1.42896	0.13442			20.5811	20.8413	20.4227	20.7785	21.0268	20.7075	1	3	3	1	3	4
C06G3.5b	WBGene00015551	C06G3.5b	0.239267	0.347007	0.836824	0.133974			21.2253	21.8428	21.2428	21.2905	21.9694	21.7688	1	5	3	4	5	4
T23C6.4	WBGene00020726	T23C6.4	0.2203	0.64625	1.43049	0.133192			21.4286	21.0066	20.938	21.3719	21.3352	21.327	1	1	1	1	2	2
ZK418.9a	WBGene00022738	ZK418.9a	0.223533	0.554215	1.25098	0.13316			26.0911	25.8473	26.2516	26.2007	26.1091	26.5508	15	20	17	23	25	26
Y38F1A.6	WBGene00012608	Y38F1A.6	0.2185	0.685038	1.50604	0.13282			23.4427	23.5855	23.2971	23.4228	23.7867	23.7713	3	4	6	5	6	8
Y54F10BM.1	WBGene00021856	Y54F10BM.1	0.202367	2.27218	5.49562	0.131679			22.8509	22.7511	22.7815	23.0134	23.0239	22.9533	5	5	5	4	6	5
age-1	WBGene00000090	B0334.8	0.333167	0.117232	0.322215	0.131479			18.2275	19.5662	18.781	20.094	20.2043	17.2759	NA	NA	NA	1	2	NA
pas-3	WBGene00003924	Y110A7A.14	0.2585	0.215101	0.55351	0.131417			22.9341	24.2872	23.7307	23.6808	24.4141	23.6326	1	6	3	4	7	5
C34B2.6	WBGene00016391	C34B2.6	0.219333	0.577994	1.29745	0.131412			22.9332	23.4255	22.9559	23.2636	23.4303	23.2787	5	8	6	8	10	9
glh-4	WBGene00001601	T12F5.3	0.223	0.473994	1.09316	0.130869		+	22.7391	23.3051	23.3049	23.426	23.4077	23.1844	9	7	10	10	9	9
uaf-2	WBGene00006698	Y116A8C.35	0.21	0.912302	1.95412	0.13064			27.0541	26.9218	27.2131	27.14	27.3292	27.3498	18	18	17	21	22	21
mak-2	WBGene00007007	C44C8.6	0.318767	0.123863	0.338712	0.130582			18.4475	21.1094	21.3915	20.6935	20.48	20.7312	NA	2	2	1	2	1
rpl-30	WBGene00004444	Y106G6H.3a	0.243067	0.265743	0.66519	0.130302			27.174	28.3839	27.7881	27.8548	27.9969	28.2235	22	22	24	22	22	22
T05F1.2	WBGene00011489	T05F1.2	0.206967	0.947492	2.02501	0.129176			25.41	25.5387	25.7287	25.6799	25.8015	25.8169	13	13	15	15	17	16
ufd-2	WBGene00006734	T05H10.5c	0.2037	0.882121	1.89374	0.126713			20.7053	20.6317	20.6328	20.8006	20.7162	21.0641	1	2	1	3	2	2
gdi-1	WBGene00001558	Y57G11C.10a	0.221533	0.364266	0.872359	0.126306			23.6254	24.0325	23.3569	23.8111	24.2038	23.6645	10	11	9	10	11	13
C16C8.11	WBGene00015849	C16C8.11	0.2889	0.133732	0.36301	0.125836			17.3174	18.3838	19.723	17.9931	19.1924	19.1054	NA	NA	NA	1	1	1
tomm-40	WBGene00007686	C18E9.6	0.2069	0.61883	1.37708	0.125375			21.5258	21.0636	21.2397	21.4302	21.404	21.6156	1	1	1	1	1	1
chc-1	WBGene00011867	T20G5.1	0.198567	1.1086	2.3575	0.12534			28.7986	28.6397	28.647	28.8531	28.8044	29.0235	73	91	87	102	108	110
ztf-6	WBGene00012317	W06H12.1	0.2013	0.861692	1.85306	0.125137			20.9981	20.661	20.8062	20.9372	21.0302	21.1018	1	2	3	4	2	2
Y94H6A.12a	WBGene00050885	Y94H6A.12a	0.233167	0.252195	0.635728	0.124904			22.5132	21.9626	22.3522	23.1076	22.4441	21.9758	2	3	3	2	4	3
K07E3.2	WBGene00019491	K07E3.2	0.2114	0.473172	1.09153	0.124818			18.9994	19.1739	18.8766	19.3366	18.8885	19.459	1	2	NA	1	1	1
vha-15	WBGene00020507	T14F9.1	0.209967	0.482861	1.11071	0.124311			22.3765	21.8424	21.9665	22.4539	22.2455	22.1159	3	3	3	5	3	5
ned-8	WBGene00003587	F45H11.2	0.215933	0.381958	0.908515	0.124266			23.153	22.5295	22.5858	22.783	22.9125	23.2206	4	3	3	2	1	2
T05D4.2	WBGene00011475	T05D4.2	0.1938	1.39476	2.99112	0.12385			23.1008	22.9503	23.1633	23.2413	23.2905	23.264	3	4	4	5	6	6
xpo-1	WBGene00002078	ZK742.1a	0.208033	0.504455	1.15333	0.123802			23.9886	23.5735	23.8379	23.8001	24.257	23.967	7	9	10	13	15	13
sumv-1	WBGene00016409	C34E10.8	0.229233	0.259183	0.65096	0.123766			19.9433	20.0311	20.6619	20.9801	20.1464	20.1975	1	1	1	1	1	1
emr-1	WBGene00001309	M01D7.6	0.216567	0.360203	0.864018	0.123706			22.8349	22.054	22.6381	22.5862	22.8899	22.7006	3	2	4	3	3	3
nmt-1	WBGene00020549	T17E9.2b	0.203367	0.63535	1.40926	0.123679			28.2678	27.8334	28.2588	28.2923	28.3277	28.3501	40	46	42	47	49	53
czw-1	WBGene00017643	F20D12.4	0.203067	0.595228	1.33108	0.12288			25.7288	25.9385	26.0363	25.863	26.2634	26.1864	18	21	22	29	30	30
gei-4	WBGene00001561	W07B3.2c	0.197667	0.83707	1.80422	0.122808			24.5031	24.3886	24.6334	24.5404	24.7681	24.8096	7	8	7	7	10	9
rpn-10	WBGene00004466	B0205.3	0.195667	0.965683	2.06187	0.122683			25.593	25.87	25.72	26.0056	25.8301	25.9343	11	15	14	13	16	14
F45G2.8	WBGene00009734	F45G2.8	0.210933	0.405097	0.955436	0.122581			21.8497	22.2092	22.4144	22.6503	22.2989	22.1569	2	2	2	3	5	4
gex-2	WBGene00001579	F56A11.1	0.221233	0.281405	0.698911	0.121788			21.2106	20.5642	21.139	20.9149	20.9889	21.6737	1	1	1	2	3	3
Y45G12B.3	WBGene00021564	Y45G12B.3	0.1958	0.774641	1.68119	0.121129			21.2038	21.1348	21.4167	21.5854	21.309	21.4483	2	2	2	3	3	3
pyp-1	WBGene00008149	C47E12.4d	0.1927	0.919783	1.96915	0.120599			21.2825	21.3569	21.4393	21.6549	21.3798	21.6221	1	4	2	4	3	3
moa-2	WBGene00015205	B0495.6	0.2255	0.227907	0.582169	0.11948			22.2023	23.3496	23.1695	23.2427	23.3232	22.832	1	2	2	2	2	2
T15H9.2	WBGene00011788	T15H9.2	0.2693	0.128835	0.35099	0.118778			20.0537	17.6884	19.7451	19.7918	19.3761	19.1272	NA	NA	1	1	1	1
eat-3	WBGene00001134	D2013.5	0.190967	0.741552	1.61637	0.118016			24.4966	24.6189	24.7664	24.6505	24.9523	24.852	13	17	13	17	19	18
F56B3.11a	WBGene00018934	F56B3.11a	0.225833	0.20113	0.521882	0.116847			24.3277	22.964	23.7399	23.8204	23.6464	24.2423	4	5	3	5	4	4
rcn-1	WBGene00004321	F54E7.7	0.219233	0.223167	0.571597	0.116394			21.4214	21.8294	22.3029	21.5366	22.1559	22.5189	3	3	2	2	2	2
lst-1	WBGene00003083	T22A3.3b	0.203933	0.321814	0.784437	0.115873			20.2726	20.5781	19.9249	20.4145	20.7934	20.1795	1	1	1	1	1	2
let-363	WBGene00002583	B0261.2b	0.202867	0.332259	0.806236	0.115816			21.7753	21.0732	21.5028	21.7787	21.8205	21.3607	2	2	3	2	6	4
ogt-1	WBGene00003858	K04G7.3a	0.190133	0.562753	1.26768	0.115233			24.0459	23.6736	23.8023	23.8403	24.1933	24.0586	9	11	12	15	16	18
idhb-1	WBGene00007993	C37E2.1	0.1815	0.957189	2.04464	0.114239			29.4081	29.6455	29.6642	29.7005	29.8141	29.7477	28	36	32	35	39	36
trcs-2	WBGene00011312	T01B7.6	0.1824	0.761658	1.65573	0.11328			23.8596	24.1314	24.0467	24.0904	24.1531	24.3414	8	9	10	12	11	12
sec-16	WBGene00013985	ZK512.5b	0.183433	0.694499	1.52449	0.113208			20.4739	20.3993	20.2029	20.4512	20.7204	20.4548	1	1	1	2	2	2
erfa-3	WBGene00010405	H19N07.1a	0.181067	0.838655	1.80736	0.113154			24.1545	23.8351	23.9157	24.1893	24.1661	24.0931	7	11	13	13	11	13
ssl-1	WBGene00007027	Y111B2A.22d	0.201633	0.285502	0.707677	0.112965			22.7892	22.1742	21.9071	22.6212	22.5895	22.2647	3	5	3	8	11	12
tiar-2	WBGene00012904	Y46G5A.13	0.188267	0.465332	1.07598	0.1124			26.2694	25.8661	26.1863	26.5207	26.0909	26.275	14	20	19	22	23	23
flh-1	WBGene00012435	Y11D7A.12c	0.197533	0.292187	0.721929	0.111373			23.2921	22.5236	23.2727	23.1024	23.434	23.1446	3	2	4	5	5	5
mix-1	WBGene00003367	M106.1	0.1811	0.536427	1.21615	0.10983			24.9842	25.307	24.8957	25.1829	25.4037	25.1436	13	22	16	21	21	19
rfl-1	WBGene00004341	F11H8.1	0.189	0.355512	0.854369	0.109806			21.0187	21.6403	21.2799	21.2463	21.649	21.6106	1	2	1	2	1	1
ctr-9	WBGene00007184	B0464.2a	0.1775	0.683254	1.50257	0.109694			22.6373	22.821	22.4674	22.7006	22.8764	22.8812	6	8	6	6	6	7
acl-14	WBGene00019465	K07B1.5a	0.182667	0.471582	1.08838	0.109523			22.4541	22.0103	22.548	22.5032	22.4861	22.5711	2	5	4	4	7	6
mev-1	WBGene00003225	T07C4.7	0.191667	0.30719	0.753714	0.109256			22.383	21.6262	21.8417	21.9055	22.2547	22.2657	2	2	2	2	2	2
npp-12	WBGene00003798	T23H2.1	0.1715	0.962407	2.05522	0.108308			27.5038	27.4809	27.5296	27.5314	27.8162	27.6812	21	26	21	25	30	28
eif-3.C	WBGene00001226	T23D8.4	0.167867	1.21721	2.59062	0.107277			23.9961	24.0012	24.0367	24.3046	24.0988	24.1342	9	12	7	9	13	12
Y41D4A.4c	WBGene00021506	Y41D4A.4c	0.204667	0.191659	0.500212	0.107202			20.5166	19.9616	21.2017	21.1583	20.5793	20.5563	1	2	1	1	1	1
F20G2.2	WBGene00008986	F20G2.2	0.185733	0.3193	0.779173	0.106843			24.8944	25.0727	25.3709	24.9111	25.4935	25.4906	10	15	11	12	15	15
mrps-9	WBGene00017319	F09G8.3	0.167	0.830338	1.7909	0.104817			21.8284	21.6132	21.6952	21.8106	22.0173	21.8099	1	3	1	2	3	4
Y105E8B.5	WBGene00013690	Y105E8B.5	0.1749	0.422288	0.990055	0.104315			23.9477	23.7478	23.8131	23.9795	24.3141	23.7397	5	7	6	10	9	8
sqv-5	WBGene00005023	T24D1.1a	0.222933	0.128063	0.34909	0.104242			19.1072	18.5808	19.1012	20.3799	18.5898	18.4883	NA	NA	NA	NA	1	1
swsn-7	WBGene00007433	C08B11.3	0.177167	0.350437	0.843908	0.10361			22.2021	22.2073	22.7214	22.3487	22.5492	22.7644	2	5	5	4	4	5
F10C5.2	WBGene00017328	F10C5.2	0.212433	0.142204	0.383634	0.103437			22.6066	22.1254	21.8703	23.4248	22.0196	21.7952	3	5	4	2	3	3
snr-2	WBGene00004915	W08E3.1	0.185533	0.250171	0.631301	0.103425		+	23.6423	24.6162	24.332	24.4684	24.3917	24.287	2	3	2	4	3	4
T07A9.9b	WBGene00020297	T07A9.9b	0.259867	0.0912484	0.256111	0.10334			17.6879	21.088	19.2913	20.0465	19.637	19.1633	NA	1	1	1	2	2
npp-6	WBGene00003792	F56A3.3a	0.191867	0.207031	0.535289	0.103241			21.9221	21.0413	21.2803	21.1199	21.8702	21.8292	2	2	3	4	4	3
rbm-28	WBGene00011043	R05H10.2	0.1676	0.494716	1.13413	0.101713			20.4815	20.0795	20.2736	20.6152	20.3013	20.4209	1	1	1	2	1	1
prx-19	WBGene00004201	F54F2.8	0.185533	0.221305	0.567433	0.101553			18.7111	19.5238	19.6954	19.6779	19.2654	19.5436	NA	1	1	1	1	2
prdx-3	WBGene00011110	R07E5.2	0.161133	0.721182	1.57655	0.10057			25.7375	25.6273	25.6976	25.655	25.9347	25.9561	10	16	14	15	15	17
F58F12.1	WBGene00019061	F58F12.1	0.167033	0.439483	1.0245	0.100439			26.4029	26.4071	26.7589	26.5079	26.6665	26.8956	10	12	10	12	14	12
ZK418.9b	WBGene00022738	ZK418.9b	0.259967	0.0845473	0.238657	0.100401			18.8477	21.0494	21.1481	20.9964	19.0895	21.7392	NA	1	1	1	NA	1
T05H10.3	WBGene00011508	T05H10.3	0.210867	0.118044	0.324241	0.0980621			20.5374	20.4026	18.6401	19.735	19.9869	20.4908	1	1	NA	1	1	1
asb-2	WBGene00000207	F02E8.1	0.169367	0.298328	0.734973	0.097875			25.7116	24.9912	25.4965	25.4327	25.5447	25.73	9	11	8	13	10	14
C39E9.11	WBGene00008034	C39E9.11	0.152667	1.09452	2.32785	0.0975143			20.6274	20.5391	20.59	20.6399	20.7265	20.8481	1	1	1	1	1	1
Y73B6BL.27	WBGene00022248	Y73B6BL.27	0.276067	0.0723795	0.206498	0.0973128			18.4045	18.5208	20.3297	20.8692	20.1852	17.0288	NA	NA	1	1	1	NA
dph-2	WBGene00007488	C09G5.2a	0.1693	0.280945	0.697925	0.097155			22.0816	21.5028	21.3679	21.6171	21.8783	21.9648	3	3	1	2	3	3
acs-4	WBGene00018152	F37C12.7	0.160533	0.432984	1.0115	0.0967822			25.592	25.0895	25.1846	25.3914	25.5206	25.4357	9	12	10	16	15	15
skr-8	WBGene00004814	C52D10.9	0.161833	0.384109	0.912894	0.0964859			21.7035	21.1937	21.7026	21.7321	21.7589	21.5943	2	2	2	1	3	4
elpc-4	WBGene00016128	C26B2.6	0.171	0.233448	0.594476	0.0956564			18.5698	18.9014	17.9756	18.46	18.7362	18.7636	1	NA	1	1	2	1
nuo-4	WBGene00019401	K04G7.4a	0.1521	0.727024	1.58796	0.0953137			27.1962	27.357	27.1362	27.3	27.3256	27.5201	25	36	28	38	35	40
iars-1	WBGene00002152	R11A8.6	0.151433	0.649306	1.43644	0.0943261			26.8474	26.5479	26.8491	26.8548	26.964	26.8799	28	35	36	37	35	37
mrps-17	WBGene00015487	C05D11.10	0.162367	0.296981	0.732116	0.0943018			23.5041	24.0816	23.9811	24.1075	24.1885	23.7579	6	8	6	7	8	8
T19C4.1	WBGene00011838	T19C4.1	0.1741	0.192393	0.501899	0.0942669			20.2927	19.7316	20.673	20.2209	20.8323	20.1664	1	1	1	1	1	1
ZK686.3	WBGene00022793	ZK686.3	0.188833	0.136267	0.369203	0.0938786			23.1947	22.1488	22.5045	22.4321	23.6219	22.3605	3	6	6	5	9	8
lin-5	WBGene00002994	T09A5.10	0.148833	0.786428	1.70434	0.0937636			26.3852	26.4135	26.5742	26.4987	26.7218	26.5989	30	31	33	35	36	40
ndk-1	WBGene00009119	F25H2.5	0.172567	0.188381	0.492667	0.0932657			26.0195	27.0106	25.9229	26.569	26.4819	26.4198	10	12	10	11	12	11
uba-5	WBGene00020184	T03F1.1	0.147667	0.798145	1.72739	0.0931366			24.5677	24.4706	24.2769	24.5846	24.5885	24.5851	7	9	9	11	11	10
tam-1	WBGene00006523	F26G5.9	0.1683	0.205167	0.531062	0.0926297			17.7872	18.5496	18.1673	17.9141	18.6967	18.3982	NA	NA	NA	NA	1	1
nars-1	WBGene00003815	F22D6.3a	0.144967	0.97026	2.07117	0.0923359			27.6818	27.7932	27.5786	27.7868	27.8934	27.8083	29	32	34	35	35	34
eftu-2	WBGene00001166	ZK328.2	0.157133	0.315266	0.770711	0.0922208			23.6756	23.1324	23.4219	23.3596	23.807	23.5347	5	4	6	9	10	9
gly-3	WBGene00001628	ZK688.8	0.1851	0.13427	0.364325	0.0921784			18.8594	17.4041	18.6674	18.062	18.6205	18.8037	NA	NA	NA	1	1	NA
kin-2	WBGene00002190	R07E4.6a	0.1558	0.333166	0.808124	0.0920373			21.857	22.0867	21.7727	22.1653	22.2867	21.7318	4	3	5	4	2	1
asb-1	WBGene00000206	F35G12.10	0.150333	0.486277	1.11747	0.0919734			27.6944	27.2668	27.4174	27.572	27.5502	27.7074	17	19	17	18	19	20
gmps-1	WBGene00010912	M106.4c	0.161533	0.247975	0.626493	0.0918932			20.7135	20.8352	21.2423	20.745	21.085	21.4456	1	1	1	4	5	5
W07G4.3	WBGene00012337	W07G4.3	0.145633	0.786045	1.70359	0.0918541			21.0489	20.7977	20.7913	21.0271	21.0055	21.0422	2	2	2	1	1	4
sdc-1	WBGene00004745	F52E10.1	0.151433	0.426693	0.998896	0.0916888			21.5206	21.0947	21.3003	21.5031	21.2852	21.5816	2	4	4	3	4	4
qns-1	WBGene00007698	C24F3.4a	0.163867	0.211464	0.545314	0.0910118			22.0799	21.6258	22.2378	22.3559	21.67	22.4092	2	3	1	5	4	6
sut-1	WBGene00020475	T13B5.8a	0.152067	0.350166	0.84335	0.090499			24.0755	23.7397	24.1678	24.197	23.9093	24.3329	5	6	5	7	8	10
ZK1127.3	WBGene00022850	ZK1127.3	0.218767	0.0816736	0.231117	0.0894179			21.6231	20.9292	18.5376	20.8181	20.625	20.3031	1	3	1	1	2	2
Y105C5B.19	WBGene00013658	Y105C5B.19	0.186567	0.114938	0.316474	0.089287			20.4841	18.7233	20.37	20.3127	20.0474	19.777	2	NA	1	1	1	1
T02G5.7	WBGene00020166	T02G5.7	0.151967	0.281676	0.699492	0.0884941			21.8513	21.7407	21.183	21.7219	21.6408	21.8682	2	2	2	2	2	3
F47G9.1	WBGene00009829	F47G9.1	0.145533	0.422118	0.989713	0.0883602			20.9578	20.9398	21.3201	21.237	21.0724	21.3449	1	1	1	1	1	1
tag-153	WBGene00006499	F44A2.1b	0.1445	0.402634	0.95046	0.0874681			24.3102	24.5585	24.7834	24.8023	24.573	24.7103	11	9	10	12	13	11
ulp-3	WBGene00006738	Y48A5A.2	0.1439	0.33834	0.818875	0.0858731			22.3417	22.1986	22.6913	22.5143	22.7394	22.4096	4	4	4	3	5	5
lips-9	WBGene00010267	F58G1.5	0.167067	0.133434	0.362281	0.085188			18.3897	18.749	17.6608	17.9091	19.0483	18.3433	NA	NA	NA	NA	1	1
mdt-8	WBGene00007013	Y62F5A.1b	0.1393	0.390559	0.926003	0.0844022			21.996	21.8515	21.869	22.1575	22.2168	21.7601	2	2	2	3	4	4
mrp-4	WBGene00003410	F21G4.2	0.1602	0.145514	0.391634	0.0839159			17.9946	19.1141	19.2291	18.7744	19.1503	18.8937	NA	1	NA	2	1	2
T03F6.3	WBGene00011399	T03F6.3	0.1326	0.572882	1.28747	0.0827203			17.9793	17.6736	17.9488	17.9924	18.0621	17.945	NA	1	1	1	1	NA
Y38E10A.22a	WBGene00012600	Y38E10A.22a	0.126133	2.09448	4.89984	0.0826701			27.7215	27.7964	27.7431	27.8798	27.9022	27.8574	29	36	31	48	40	42
taf-10	WBGene00006392	K03B4.3a	0.135567	0.326166	0.793535	0.0811369			21.4584	21.5342	21.6243	21.9991	21.4716	21.5529	2	3	3	5	4	4
ncbp-2	WBGene00009141	F26A3.2a	0.162267	0.113214	0.312146	0.0803363			20.2804	20.0053	21.3949	20.3044	20.5598	21.3032	1	2	1	2	1	3
acs-11	WBGene00018269	F41C3.3	0.127967	0.604332	1.34883	0.0802363			27.1218	27.1289	27.3589	27.4344	27.3081	27.251	26	23	24	27	27	28
Y51H1A.3a	WBGene00013094	Y51H1A.3a	0.136667	0.260965	0.654831	0.0799826			25.2667	24.8289	25.1809	24.9553	25.5096	25.2216	6	9	7	9	9	8
panl-2	WBGene00017951	F31E3.4	0.1297	0.457757	1.06093	0.0799506			23.3519	22.9614	23.1155	23.2042	23.2555	23.3582	5	4	5	8	7	7
sco-1	WBGene00015297	C01F1.2	0.130967	0.395112	0.935237	0.079856			22.2372	21.8718	22.0504	22.2986	22.0019	22.2518	2	4	3	4	5	6
T20B3.1	WBGene00011850	T20B3.1	0.129233	0.460913	1.0672	0.0797198			24.0272	23.779	23.636	23.9932	23.9726	23.8641	5	8	7	11	11	8
lin-14	WBGene00003003	T25C12.1b	0.1536	0.126859	0.34612	0.0790214			18.743	19.6454	20.1975	19.8392	19.786	19.4215	NA	1	1	1	2	1
ubq-2	WBGene00006728	ZK1010.1	0.126833	0.525542	1.1948	0.0789671			28.5277	28.4693	28.4089	28.6083	28.4154	28.7627	11	14	10	16	21	22
Y77E11A.7c	WBGene00022310	Y77E11A.7c	0.129833	0.353752	0.850745	0.0785625			23.2677	23.1736	23.6184	23.6209	23.3882	23.4401	4	7	6	7	8	6
pbs-7	WBGene00003953	F39H11.5	0.1351	0.216768	0.557258	0.0775351			25.9576	26.4052	25.8511	25.8716	26.45	26.2976	9	17	12	17	17	17
skr-12	WBGene00004818	C52D10.6	0.135	0.217301	0.558456	0.0775088			23.1268	22.7998	22.7536	23.2096	23.2684	22.6072	3	3	1	6	5	2
gst-7	WBGene00001755	F11G11.2	0.1476	0.131461	0.357446	0.0771591			29.0293	30.1403	29.835	29.354	30.1955	29.8979	25	24	26	24	25	24
R12B2.2	WBGene00020018	R12B2.2	0.201967	0.0619148	0.178329	0.076719			18.6176	21.3466	22.4068	20.9353	20.8659	21.1757	NA	3	2	3	3	3
dlc-1	WBGene00001005	T26A5.9	0.1272	0.299127	0.736667	0.0760461			27.272	26.7058	27.0336	27.0372	27.1328	27.223	6	8	6	6	7	7
mct-6	WBGene00015676	C10E2.6	0.135533	0.180642	0.474761	0.0759087			20.5841	20.0567	19.9552	20.1033	20.1488	20.7505	1	1	1	2	2	2
C25A1.4	WBGene00007706	C25A1.4	0.125633	0.328581	0.798573	0.075805			26.4992	26.4898	26.4054	26.3068	26.6262	26.8383	13	23	19	23	30	24
Y92H12A.4a	WBGene00022360	Y92H12A.4a	0.131267	0.208715	0.539101	0.0752895			21.3976	20.6734	21.3766	21.3037	21.3558	21.1819	1	2	2	4	3	4
pbs-4	WBGene00003950	T20F5.2	0.133	0.18852	0.492989	0.0751505			25.0911	25.9786	25.5204	25.7658	25.7276	25.4957	8	13	11	13	13	12
Y34D9A.7b	WBGene00021332	Y34D9A.7b	0.134133	0.178711	0.47027	0.0751352			20.6833	21.6534	21.1422	21.4006	21.2395	21.2412	3	1	3	1	2	2
gtbp-1	WBGene00010677	K08F4.2	0.120867	0.449161	1.04382	0.0748033			25.5163	25.8959	25.7683	25.7871	25.8655	25.8905	14	13	14	18	14	17
ears-1	WBGene00001337	ZC434.5	0.117767	0.671305	1.47928	0.0745542			29.265	29.2234	29.423	29.4237	29.3315	29.5095	73	102	99	95	97	95
lin-7	WBGene00002996	Y54G11A.10b	0.1242	0.299003	0.736404	0.0744311			21.4413	21.5126	21.7031	21.9534	21.6357	21.4405	2	2	2	2	2	3
eat-6	WBGene00001137	B0365.3	0.1277	0.2221	0.56921	0.0740571			26.9254	26.1878	26.7162	26.6895	26.8305	26.6925	25	24	24	28	28	29
rhgf-2	WBGene00006476	T08H4.1b	0.126133	0.226922	0.579975	0.0734409			21.9223	21.8874	22.1438	21.8814	22.5136	21.9369	3	4	3	3	3	3
K08F4.3	WBGene00010678	K08F4.3	0.123933	0.256931	0.646059	0.073254			21.6038	21.0214	21.5647	21.4617	21.5074	21.5926	1	2	1	3	3	3
vang-1	WBGene00015171	B0410.2b	0.120933	0.288985	0.71511	0.0724537			21.4822	20.9948	20.9901	21.2249	21.2406	21.3644	2	2	2	2	2	2
nduf-7	WBGene00012376	W10D5.2	0.1205	0.28115	0.698364	0.0720458			22.2291	21.8704	22.3055	22.0397	22.3429	22.3839	2	2	3	1	3	3
sod-2	WBGene00004931	F10D11.1	0.115933	0.384747	0.914192	0.071264			25.745	25.9065	25.4838	25.8839	25.7801	25.8191	8	8	8	8	10	6
pqn-53	WBGene00004138	R07B7.3a	0.112433	0.608763	1.35746	0.0710333			25.8301	25.6861	25.814	25.9869	25.9251	25.7555	14	17	15	18	16	16
T09B9.4	WBGene00011645	T09B9.4	0.125633	0.15602	0.416831	0.069742			19.6593	20.601	20.4498	20.2268	20.4848	20.3754	NA	2	2	1	2	2
Y54E5A.5	WBGene00013200	Y54E5A.5	0.1163	0.236579	0.601407	0.0686792			24.6475	24.8273	25.1755	24.845	25.226	24.9282	7	7	7	9	5	6
vps-25	WBGene00012193	W02A11.2	0.160333	0.0624194	0.179699	0.0670224			16.9946	19.4189	19.8474	18.7439	18.9978	19.0002	NA	NA	NA	1	1	1
M03F8.3a	WBGene00019762	M03F8.3a	0.121367	0.144122	0.388274	0.066958			22.8775	22.2385	22.2907	22.8224	22.1181	22.8303	4	6	4	7	4	4
coq-4	WBGene00000764	T03F1.2	0.1122	0.250308	0.631602	0.0668795			20.5714	20.4967	20.4432	20.5232	20.9523	20.3724	1	1	1	1	1	1
egl-30	WBGene00001196	M01D7.7a	0.1178	0.15934	0.42473	0.0662783			21.4857	21.1441	21.3143	20.9217	21.7648	21.611	1	3	2	5	5	3
B0035.12	WBGene00007111	B0035.12	0.123333	0.116006	0.319148	0.0653787			18.5138	18.8354	18.1178	17.9802	19.0667	18.7901	NA	NA	NA	NA	1	2
trap-1	WBGene00022122	Y71F9AM.6	0.105633	0.365693	0.875285	0.0651782			26.5586	26.2326	26.2272	26.3971	26.5462	26.392	4	6	5	5	7	6
Y53C12A.10	WBGene00175030	Y53C12A.10	0.1063	0.333999	0.809856	0.0651644			22.3237	22.4665	22.7095	22.668	22.4715	22.6791	2	2	2	2	2	2
C35D10.6	WBGene00016443	C35D10.6	0.113767	0.171203	0.452729	0.0649616			21.9694	22.4545	22.3067	22.1789	22.7686	22.1244	3	3	3	3	1	2
T06A10.3	WBGene00020286	T06A10.3	0.1041	0.387438	0.919662	0.0645304			20.5307	20.2578	20.4191	20.5665	20.3466	20.6068	1	2	2	3	2	2
mag-1	WBGene00003123	R09B3.5	0.1038	0.401654	0.948478	0.0644945			23.2142	23.0023	23.2829	23.1788	23.4069	23.2251	3	3	3	3	4	6
mcd-1	WBGene00013096	Y51H1A.6a	0.112	0.165506	0.439326	0.06382			18.9352	19.1896	19.0539	18.6885	19.3518	19.4744	1	1	1	NA	2	1
hat-1	WBGene00044069	M03C11.4	0.1035	0.29931	0.737055	0.0630935			24.2298	24.0924	24.4575	24.1815	24.4727	24.436	7	11	8	10	9	10
ech-6	WBGene00001155	T05G5.6	0.118867	0.112142	0.309452	0.0630887			21.2787	22.4501	21.345	21.9094	21.8083	21.7127	2	2	1	2	2	3
acdh-12	WBGene00017125	E04F6.5a	0.0957333	0.653481	1.44457	0.0611218			24.9262	24.8025	24.7462	24.9011	24.8641	24.9969	10	16	11	16	20	18
nst-1	WBGene00003821	K01C8.9	0.1051	0.176677	0.465531	0.0609006			22.1594	22.3756	22.4711	22.0425	22.7323	22.5466	2	3	3	4	3	3
kbp-5	WBGene00016387	C34B2.2	0.0987667	0.307912	0.755235	0.0605642			23.1746	23.2929	22.894	23.1088	23.2611	23.2879	4	4	5	5	3	5
mrpl-39	WBGene00044344	Y46H3A.7	0.111833	0.116971	0.321562	0.060523			22.1601	23.2155	23.1852	23.0151	22.949	22.9322	1	5	2	5	5	5
C41D11.5	WBGene00016564	C41D11.5	0.104067	0.172205	0.455077	0.0602001			26.8394	26.2577	26.3558	26.869	26.477	26.4191	18	23	23	25	21	19
dld-1	WBGene00010794	LLC1.3a	0.0957667	0.329829	0.801174	0.0591323			27.6754	28.0232	27.9855	27.9281	28.081	27.9623	20	28	28	28	27	30
tpa-1	WBGene00006599	B0545.1b	0.0952333	0.255544	0.643037	0.0577837			20.0852	20.3627	20.1726	20.0638	20.4768	20.3656	1	2	1	2	2	2
ran-3	WBGene00004304	C26D10.1	0.0947	0.217536	0.558983	0.0567265			26.1618	25.8906	25.8522	26.3389	25.9027	25.9471	15	19	16	19	16	18
mars-1	WBGene00003415	F58B3.5a	0.0896333	0.468005	1.08129	0.0566262			28.2623	28.0278	28.2185	28.2312	28.2062	28.3401	35	39	33	45	43	44
B0416.5b	WBGene00015181	B0416.5b	0.0937	0.225541	0.576897	0.0563636			22.1064	21.5888	21.6839	21.9516	21.8456	21.863	2	1	2	3	2	2
mecr-1	WBGene00012375	W09H1.5	0.0917667	0.23085	0.588712	0.0554188			28.2709	28.0167	27.8813	28.3598	28.0543	28.0301	24	31	31	32	36	32
B0205.6	WBGene00015021	B0205.6	0.0919333	0.211859	0.546205	0.0551056			23.0309	23.1945	23.4449	23.4956	23.3562	23.0943	3	4	4	6	5	5
snx-6	WBGene00013354	Y59A8B.22a	0.0894667	0.190669	0.497936	0.0532643			25.4468	25.0362	25.4326	25.6261	25.3275	25.2304	14	14	15	14	13	14
T16G1.9	WBGene00011802	T16G1.9	0.0863	0.277278	0.690059	0.0531057			21.786	21.6222	21.8129	21.9776	21.6127	21.8897	3	2	2	1	4	3
C16A3.6	WBGene00015811	C16A3.6	0.0852667	0.285727	0.708157	0.0526205			20.8252	20.8562	21.0536	21.0731	21.1131	20.8046	2	2	2	2	2	2
Y75B8A.8	WBGene00013545	Y75B8A.8	0.0929667	0.122923	0.336382	0.0523351			22.7075	21.9034	22.6102	22.4332	22.7156	22.3512	6	6	4	5	5	4
larp-5	WBGene00004147	T12F5.5b	0.0837	0.339839	0.821984	0.0522528			20.7995	20.7997	20.7316	21.0389	20.8472	20.6958	1	2	2	2	4	2
Y39G10AR.9a	WBGene00021467	Y39G10AR.9a	0.0826	0.376491	0.89737	0.0518829			23.2664	23.5586	23.3938	23.4174	23.5358	23.5134	5	8	7	7	9	8
ttr-25	WBGene00013078	Y51A2D.10a	0.102833	0.0734419	0.20933	0.0516426			21.3961	22.4305	22.3836	21.4604	22.574	22.4843	2	4	3	3	3	4
csn-6	WBGene00000818	Y67H2A.6a	0.0845333	0.24018	0.609358	0.0515848			23.8476	24.313	24.0697	24.1726	24.2144	24.0969	8	13	9	12	11	10
F54C8.7e	WBGene00010040	F54C8.7e	0.0883333	0.145088	0.390606	0.0511738			22.7832	22.8817	22.4032	22.4321	22.951	22.95	6	2	2	3	6	6
fbp-1	WBGene00001404	K07A3.1a	0.1368	0.0393038	0.115689	0.0509976			17.9717	21.4	20.0203	20.179	20.8953	18.7281	NA	2	2	1	1	NA
B0041.8	WBGene00015011	B0041.8	0.0875333	0.14545	0.391482	0.0507853			23.5881	22.8509	23.4167	23.4081	23.3403	23.3699	4	3	3	5	5	6
cul-4	WBGene00000839	F45E12.3	0.113933	0.0516898	0.150317	0.0504586			16.9787	18.7849	19.3436	18.138	18.9816	18.3294	NA	NA	NA	NA	2	1
smc-3	WBGene00004873	Y47D3A.26a	0.0799	0.347629	0.838111	0.0500836			26.4146	26.5657	26.472	26.6893	26.403	26.5997	28	47	32	50	49	45
R07E4.3	WBGene00019937	R07E4.3	0.0838667	0.174765	0.461067	0.0498643			20.5003	20.6343	20.7619	20.4492	21.019	20.6799	1	1	1	2	1	1
F45F2.10	WBGene00018482	F45F2.10	0.0880333	0.119562	0.328027	0.0497821			20.7135	21.5794	21.409	21.2684	21.4079	21.2897	2	3	2	1	3	2
zhit-2	WBGene00009648	F43C1.3	0.1019	0.0648033	0.186153	0.0497705			19.138	19.9976	18.3922	19.7251	19.3759	18.7325	1	1	1	1	1	NA
icl-1	WBGene00001564	C05E4.9a	0.0839667	0.151215	0.405344	0.0491853			25.0296	25.2189	24.5292	25.0446	25.0215	24.9635	13	18	14	14	22	22
W08E12.7	WBGene00021088	W08E12.7	0.0861	0.120209	0.329638	0.0488873			26.5951	27.4701	26.8341	27.0514	27.0644	27.0418	18	34	27	27	29	28
bub-3	WBGene00013209	Y54G9A.6	0.0767	0.439922	1.02538	0.0487045			26.7838	27.0401	26.8893	26.9968	26.9705	26.976	21	20	20	24	26	24
cct-2	WBGene00000378	T21B10.7	0.0906667	0.088151	0.248065	0.0486019			25.7705	26.9704	26.0253	26.3163	26.3821	26.3398	19	32	23	28	28	28
E01B7.2	WBGene00008442	E01B7.2	0.0831667	0.123221	0.33712	0.0476137			21.2249	21.3315	21.3886	21.2716	21.866	21.0569	1	3	1	1	3	1
F53A2.7	WBGene00009952	F53A2.7	0.0869333	0.090405	0.253924	0.0471859			28.8897	29.8279	29.6568	29.1849	29.7936	29.6567	53	63	66	59	68	63
mtm-3	WBGene00003476	T24A11.1b	0.0867667	0.0786713	0.223204	0.0459391			23.2424	22.8377	22.7379	22.3242	23.4887	23.2654	3	5	4	7	7	7
T04D3.5	WBGene00011434	T04D3.5	0.101867	0.0484487	0.141331	0.0458701			17.7832	18.3381	18.7587	17.0928	19.263	18.8298	NA	1	1	NA	1	1
vha-19	WBGene00021952	Y55H10A.1	0.0786667	0.131542	0.357645	0.0457376			22.8198	22.364	22.4248	22.6453	22.3112	22.8881	3	3	3	4	3	4
unc-132	WBGene00021078	W08A12.1c	0.0781667	0.107941	0.298852	0.0443736			21.1012	21.1241	21.376	21.7685	20.9891	21.0782	1	1	1	1	1	2
wdr-5.3	WBGene00013862	ZC302.2a	0.0771	0.109026	0.301595	0.0439156			21.0557	20.6909	21.4472	21.3325	21.2066	20.886	1	1	1	2	2	2
F33D4.6b	WBGene00017998	F33D4.6b	0.0738667	0.148032	0.397702	0.0438187			24.6217	24.0422	24.4012	24.5362	24.4717	24.2788	6	5	7	5	6	5
gln-5	WBGene00001606	F26D10.10	0.0741333	0.102633	0.285371	0.0421265			22.6329	23.3707	22.6004	23.0439	22.8213	22.9612	2	4	3	4	4	4
F27D4.4a	WBGene00009189	F27D4.4a	0.0677333	0.243678	0.61706	0.0420765			23.7309	23.4461	23.5942	23.7408	23.5132	23.7204	5	7	6	9	7	8
snr-3	WBGene00004916	T28D9.10a	0.0671333	0.215184	0.553697	0.0414085		+	24.8636	24.7412	25	24.7503	24.9874	25.0685	5	9	7	7	8	6
mrpl-30	WBGene00021021	W04B5.4	0.0676667	0.151261	0.405454	0.0405945			23.9362	23.551	23.4241	23.8132	23.7107	23.5904	6	6	6	6	6	5
mtm-1	WBGene00003475	Y110A7A.5	0.0669	0.0912833	0.256201	0.0379871			19.2438	19.9263	19.622	19.5355	20.0029	19.4544	1	2	NA	1	3	2
mrps-6	WBGene00020037	R12E2.12	0.0599667	0.262541	0.658252	0.0376888			24.0159	24.0066	24.0552	24.2221	24.1193	23.9162	4	7	6	8	11	5
C12D8.1a	WBGene00007534	C12D8.1a	0.06	0.197921	0.514562	0.0371148			25.9546	25.6804	25.8699	25.8126	25.8097	26.0626	16	14	15	14	14	16
elo-1	WBGene00001239	F56H11.4a	0.0643	0.0969581	0.270846	0.0370092			21.6654	20.9506	21.2945	21.5657	21.378	21.1597	2	1	2	1	2	2
act-5	WBGene00000067	T25C8.2	0.0895667	0.0290902	0.0865195	0.035329			21.4421	23.4609	21.1877	21.2221	23.5979	21.5394	1	5	1	1	6	3
E02H1.5	WBGene00008457	E02H1.5	0.0583333	0.139072	0.376033	0.035244			20.0815	19.834	19.7645	19.789	19.8762	20.1898	1	1	1	1	1	1
unc-115	WBGene00006839	F09B9.2a	0.0570333	0.134828	0.365689	0.0344412			22.782	23.0639	22.9301	23.0638	23.161	22.7223	2	3	3	3	5	4
atgp-1	WBGene00000224	F26D10.9a	0.0590667	0.0688185	0.196967	0.032817			21.302	21.4392	22.0353	21.7616	21.9257	21.2664	3	3	3	3	4	3
mus-101	WBGene00009507	F37D6.1	0.0535667	0.150476	0.403572	0.032808			20.9207	20.6971	20.7471	20.7024	21.0681	20.7551	1	2	1	2	4	2
symk-1	WBGene00017797	F25G6.2	0.0606	0.0545018	0.158071	0.0321763			20.2931	19.5872	20.0491	19.622	20.6726	19.8166	1	2	1	2	4	2
E02H1.6	WBGene00008458	E02H1.6	0.0784333	0.0279919	0.0833478	0.0321312			21.0902	18.3937	21.2274	20.1711	20.6839	20.0916	1	1	1	1	1	1
Y53G8AL.2	WBGene00021800	Y53G8AL.2	0.0493	0.23126	0.589623	0.0311313			26.0044	25.9898	26.1809	26.0254	26.0811	26.2165	13	13	12	17	20	21
cyn-7	WBGene00000883	Y75B12B.2	0.0555	0.0518333	0.150713	0.029707			25.559	26.5632	25.3826	25.8766	25.8639	25.9308	17	19	14	13	18	17
rsd-3	WBGene00004682	C34E11.1	0.0625667	0.0339545	0.100484	0.0294757			19.3138	20.8283	21.306	20.2796	20.8465	20.5097	NA	3	2	2	2	2
chd-3	WBGene00000482	T14G8.1	0.0486667	0.114798	0.316122	0.0294245			24.7898	24.3248	24.4133	24.5	24.4997	24.6742	10	12	10	11	13	12
smg-9	WBGene00013188	Y54E2A.2	0.0496	0.0912449	0.256102	0.0292855			20.3979	20.7352	20.833	20.4278	20.7906	20.8965	1	1	1	1	1	1
cutl-25	WBGene00021919	Y55D5A.6	0.0609333	0.0353064	0.104342	0.0292389			18.1126	19.2373	17.4116	18.4848	18.6211	17.8384	NA	1	NA	1	1	NA
Y37E3.10a	WBGene00021351	Y37E3.10a	0.0471667	0.134013	0.363696	0.0289422			25.7044	26.026	25.9308	26.0275	25.7586	26.0166	11	13	13	16	14	14
tat-4	WBGene00020784	T24H7.5c	0.0496667	0.0732381	0.208787	0.0285789			21.5092	20.8525	21.2842	21.1473	21.5429	21.1047	1	1	1	2	2	1
F20D1.3	WBGene00008975	F20D1.3	0.0431333	0.180933	0.475435	0.0271155			23.7703	23.9098	23.6219	23.7379	23.8506	23.8429	5	7	7	6	6	6
trxr-2	WBGene00014028	ZK637.10	0.0446	0.103303	0.287079	0.0269428			24.0917	23.8919	23.8469	24.2034	23.7367	24.0242	6	8	6	11	11	10
ndx-9	WBGene00003586	F13H10.2b	0.0473667	0.0486637	0.141929	0.0258307			22.3067	23.385	22.9149	22.9674	23.0904	22.6909	2	6	6	5	6	7
rack-1	WBGene00010556	K04D7.1	0.0433667	0.080159	0.227129	0.0256466			30.3088	30.9589	30.6196	30.6676	30.6147	30.7351	41	50	46	50	50	53
lin-54	WBGene00003037	JC8.6b	0.0415333	0.0894369	0.25141	0.0249419			21.5904	21.5817	21.7942	21.972	21.4561	21.6628	2	2	2	2	2	2
ftt-2	WBGene00001502	F52D10.3a	0.0439667	0.0525533	0.152702	0.0245909			25.2019	26.1051	25.6267	25.9057	25.4843	25.6756	8	14	12	11	17	14
rcor-1	WBGene00022278	Y74C9A.4c	0.0417	0.0723557	0.206434	0.0245006			21.1755	21.6944	21.7146	21.7666	21.4734	21.4696	3	4	3	4	4	4
C42C1.11c	WBGene00016589	C42C1.11c	0.0420333	0.066159	0.189813	0.0244175			22.8485	22.9313	22.446	23.0178	22.4703	22.8638	4	5	3	5	6	6
F15B10.3b	WBGene00017481	F15B10.3b	0.0443667	0.0392384	0.115505	0.0235478			20.5622	20.2267	21.5093	20.7967	20.8242	20.8104	2	2	2	2	2	2
F53F4.10	WBGene00009992	F53F4.10	0.0382333	0.1092	0.302034	0.0235053			26.8948	27.3313	27.1488	27.1646	27.1659	27.1591	19	19	20	23	22	23
hrp-1	WBGene00001999	F42A6.7a	0.0385333	0.0512019	0.148968	0.0219105			24.8049	25.1346	25.0998	24.8537	24.7784	25.5228	8	11	8	9	11	9
perm-2	WBGene00016636	C44B12.1	0.0342333	0.137706	0.37271	0.0215054			22.9675	23.1239	23.0569	23.0078	23.2434	22.9998	4	4	4	4	3	2
Y92H12BR.2	WBGene00022368	Y92H12BR.2	0.0310667	0.120244	0.329726	0.0194871			23.7074	23.6033	23.7718	23.8858	23.6531	23.6368	4	5	4	4	5	5
B0001.2	WBGene00007087	B0001.2	0.0368	0.0312527	0.0927443	0.0194012			18.7571	20.0006	18.98	19.0743	19.3993	19.3745	NA	NA	NA	1	1	1
rps-4	WBGene00004473	Y43B11AR.4	0.0310333	0.0837676	0.236614	0.0190254			30.6531	30.832	30.9151	30.6236	30.8976	30.9721	65	67	62	66	60	61
vps-28	WBGene00013598	Y87G2A.10a	0.0290333	0.0763168	0.216972	0.0177703			22.5725	22.2865	22.2831	22.5684	22.4155	22.2453	3	1	2	3	3	3
rab-11.1	WBGene00004274	F53G12.1	0.0280667	0.0704763	0.201411	0.0171206			21.7639	21.4024	21.8352	21.6768	21.7689	21.64	2	2	2	2	2	3
rop-1	WBGene00004405	C12D8.11	0.0258333	0.16477	0.437591	0.0165701			24.9731	25.1586	25.0889	25.0689	25.0833	25.1459	10	19	15	18	24	16
unc-116	WBGene00006840	R05D3.7	0.0253333	0.136608	0.370034	0.0161517			25.4672	25.283	25.2951	25.3913	25.4217	25.3083	16	17	18	21	23	21
rps-5	WBGene00004474	T05E11.1	0.0258	0.0872195	0.245638	0.0160744			27.0315	27.149	27.2673	27.0151	27.2568	27.2533	13	15	16	15	14	13
ttr-46	WBGene00011571	T07C12.7	0.0283	0.0306177	0.090919	0.0156244			19.5884	20.424	20.3319	19.9611	20.4705	19.9976	NA	1	3	1	3	2
cars-1	WBGene00000800	Y23H5A.7c	0.0254	0.069048	0.197583	0.0155967			24.5003	24.2975	24.3492	24.1854	24.5563	24.4815	8	11	10	14	16	13
E01G4.6	WBGene00008448	E01G4.6	0.0392333	0.0115647	0.0350455	0.0149774			17.6659	20.6244	21.275	20.162	19.6842	19.8368	1	1	1	1	1	1
ubc-12	WBGene00006707	R09B3.4	0.0232333	0.101326	0.282036	0.0146825			23.8317	23.7219	23.8657	23.78	23.9679	23.7411	1	5	4	2	3	3
nud-1	WBGene00003829	F53A2.4	0.0267667	0.0265869	0.0792802	0.0145659			21.2011	21.7469	21.1668	21.9581	21.151	21.086	2	5	2	2	4	4
T08A11.2	WBGene00011605	T08A11.2	0.0231333	0.090959	0.255361	0.0145439			23.4869	23.3709	23.2359	23.4962	23.3302	23.3367	8	6	6	6	8	8
yop-1	WBGene00022127	Y71F9B.3	0.0232333	0.0513431	0.149358	0.0140336			25.1572	24.7261	24.9018	24.8631	25.1363	24.8554	5	4	5	5	5	4
prmt-1	WBGene00013766	Y113G7B.17	0.0248667	0.0277205	0.0825628	0.0138057			24.3324	23.8038	23.3225	23.983	23.8259	23.7244	5	7	5	10	9	9
C01G6.5	WBGene00007227	C01G6.5	0.0217	0.0441522	0.129338	0.0130113			20.016	19.4377	19.7097	19.752	19.7643	19.7122	1	1	1	1	1	1
hmr-1	WBGene00001980	W02B9.1a	0.0212333	0.0391205	0.115171	0.0126061			22.1671	21.7099	21.6224	22.0012	21.7656	21.7963	2	3	4	4	7	5
rmd-1	WBGene00011501	T05G5.7a	0.0208333	0.0352721	0.104244	0.012256			25.6748	25.1569	25.5043	25.2122	25.5509	25.6354	11	15	15	12	17	17
F22G12.5a	WBGene00009065	F22G12.5a	0.0226333	0.020133	0.0604457	0.0120747			21.8284	20.5836	20.9804	21.0211	21.1636	21.2756	2	2	3	3	2	1
nuo-5	WBGene00021562	Y45G12B.1a	0.0189333	0.0538773	0.156352	0.0116794			28.3164	28.6242	28.6829	28.4778	28.6139	28.5886	46	66	60	58	66	65
Y53F4B.9	WBGene00013156	Y53F4B.9	0.0209667	0.0168052	0.0506355	0.010954			19.2454	19.7977	20.3341	19.8525	20.2595	19.3281	NA	1	1	1	2	1
pas-5	WBGene00003926	F25H2.9	0.0185	0.02856	0.0849891	0.0107704			25.5244	26.2001	25.7114	25.9512	25.6727	25.8675	14	19	15	16	19	18
acbp-6	WBGene00012457	Y17G7B.1	0.025	0.0089988	0.0273473	0.0103555			21.699	18.627	20.8024	20.4654	20.2772	20.4608	2	NA	1	1	1	1
Y111B2A.2	WBGene00013728	Y111B2A.2	0.0175667	0.0222543	0.0666638	0.00996119			22.6398	22.1106	21.9447	22.0215	22.5571	22.1692	1	2	2	2	2	1
Y14H12B.1b	WBGene00021191	Y14H12B.1b	0.0190667	0.0147968	0.0446812	0.00989588			22.0503	21.4074	21.2893	21.4232	22.2861	21.0949	2	2	3	4	2	2
prp-19	WBGene00020423	T10F2.4	0.0162333	0.0328328	0.0972757	0.00973876			26.7961	27.3695	27.1257	27.1164	27.0848	27.1388	17	24	17	25	26	27
pph-4.1	WBGene00004085	Y75B8A.30	0.0161667	0.0225588	0.0675543	0.00929485			25.2846	24.5343	24.9628	24.9844	24.753	25.0928	10	11	10	14	12	11
vpr-1	WBGene00018008	F33D11.11	0.0149333	0.0424571	0.12458	0.00921885			25.4733	25.0735	25.3194	25.3272	25.3369	25.2469	9	6	9	10	13	9
aos-1	WBGene00000142	C08B6.9	0.0145	0.0386	0.113698	0.0089092			24.8327	25.2167	24.9897	25.0535	24.9096	25.1195	10	12	10	11	13	11
ctc-2	WBGene00010965	MTCE.31	0.0144333	0.0158332	0.047757	0.00800862			23.7045	23.1578	23.8937	23.1869	23.8179	23.7945	2	2	2	2	2	2
cks-1	WBGene00001051	C09G4.3	0.013	0.0219412	0.0657478	0.0076573			21.1639	20.5915	20.6553	20.9342	20.6655	20.85	1	1	1	1	1	1
sca-1	WBGene00004736	K11D9.2b	0.0124333	0.0294031	0.0874216	0.00757104			27.3328	26.8598	27.1817	27.1416	27.087	27.183	31	33	33	35	34	34
smu-2	WBGene00004896	Y49F6B.4	0.0107667	0.0507381	0.147684	0.00684509			21.1984	21.2402	21.3934	21.3407	21.3195	21.2041	1	1	2	2	3	4
C36B7.6	WBGene00016469	C36B7.6	0.0113333	0.0124844	0.0377941	0.00629675			19.437	19.2945	18.6902	18.8297	19.4993	19.1267	2	1	1	2	2	2
let-526	WBGene00002717	C01G8.9a	0.0118333	0.00866956	0.0263564	0.00607157			20.7726	20.778	19.5655	20.0087	20.4652	20.6777	1	1	1	1	2	1
F09E5.2	WBGene00017282	F09E5.2	0.00963333	0.0163019	0.0491458	0.00567998			21.6353	21.0092	21.1355	21.195	21.2687	21.3452	1	2	2	2	2	2
Y57A10A.23	WBGene00013263	Y57A10A.23	0.00846667	0.0166627	0.0502139	0.00507408			27.2135	27.4519	27.6246	27.218	27.6276	27.4698	13	16	17	17	21	20
cri-3	WBGene00010303	F59A2.3	0.00953333	0.0079743	0.0242616	0.00503626			22.7995	23.9751	22.9731	23.4476	23.3481	22.9806	4	3	4	3	4	5
Y39B6A.3a	WBGene00012666	Y39B6A.3a	0.00743333	0.0135716	0.0410365	0.0044216			24.0512	24.2168	23.7732	24.2275	23.7905	24.0455	6	6	7	6	5	5
nol-1	WBGene00021073	W07E6.1	0.00673333	0.0235898	0.0705646	0.00422041			22.6571	22.7168	22.6223	22.7717	22.4897	22.755	5	3	2	6	6	6
ubc-25	WBGene00006720	F25H2.8	0.0049	0.0197778	0.0594019	0.00309639			25.1648	25.0128	24.9184	25.1182	24.9974	24.9951	9	9	9	10	11	11
hch-1	WBGene00001828	F40E10.1	0.00576667	0.00467863	0.0142874	0.00302932			20.5178	21.0011	20.0973	19.9308	20.8927	20.81	1	2	2	1	2	1
ain-1	WBGene00015547	C06G1.4	0.00466667	0.016968	0.051117	0.00293262			26.4469	26.3289	26.6309	26.4242	26.5017	26.4948	19	21	19	26	24	26
alkb-8	WBGene00007581	C14B1.10	0.00386667	0.00508651	0.0155258	0.00221073			21.5857	21.4499	20.9924	21.6688	21.0779	21.2929	2	3	3	3	2	3
aars-1	WBGene00000196	W02B12.6a	0.003	0.00523282	0.0159698	0.0017774			20.7684	20.9323	21.2039	20.7803	21.2403	20.893	2	4	2	3	3	2
Y45G5AM.7	WBGene00021559	Y45G5AM.7	0.00273333	0.0033164	0.0101432	0.00154471			20.4717	19.9462	20.3103	20.6661	20.1478	19.9225	3	2	2	3	3	1
Y57A10A.29	WBGene00013269	Y57A10A.29	0.0028	0.00261898	0.00801647	0.0015141			22.3592	23.0168	23.0624	23.3423	22.4966	22.6079	2	3	2	3	4	3
moma-1	WBGene00019333	K02F3.10	0.00253333	0.00466291	0.0142397	0.00150982			22.887	22.4876	23.0181	22.658	22.8124	22.9299	4	4	3	4	3	3
T11G6.8a	WBGene00011722	T11G6.8a	0.00163333	0.00424154	0.0129591	0.00100449			25.6535	25.2631	25.5689	25.423	25.4964	25.571	13	13	15	17	14	12
fasn-1	WBGene00009342	F32H2.5	0.0011	0.00385745	0.0117907	0.000690394			24.3888	24.5175	24.2022	24.3369	24.3762	24.3987	14	16	14	17	19	20
dim-1	WBGene00001000	C18A11.7b	0.000933333	0.00252239	0.00772168	0.000575822			25.6201	25.8123	25.5085	25.7202	25.7394	25.4841	11	12	14	11	14	12
egl-45	WBGene00001209	C27D11.1	0.000233333	0.000307653	0.000944195	0.000133553			25.4349	26.2385	25.7518	25.723	25.7337	25.9692	15	25	23	25	26	27
T23H2.3	WBGene00020742	T23H2.3	-0.000333333	0.00100258	-0.0030745	-0.000207243			23.0253	23.0883	23.108	23.2565	22.891	23.0731	6	6	6	7	7	6
Y56A3A.19	WBGene00013237	Y56A3A.19	-0.000766667	0.00101319	-0.00310699	-0.000438909			25.0724	24.2565	24.6993	24.5327	24.7224	24.7708	5	5	5	5	6	4
rps-2	WBGene00004471	C49H3.11	-0.00126667	0.00294679	-0.00901652	-0.00077213			29.7169	29.7665	29.9361	29.561	29.8919	29.9628	34	37	37	35	38	40
eif-3.B	WBGene00001225	Y54E2A.11a	-0.0014	0.00257344	-0.0078775	-0.000834465			26.1308	26.6736	26.1779	26.2965	26.2802	26.4014	23	33	22	38	36	30
tut-1	WBGene00017928	F29C4.6	-0.00146667	0.00384643	-0.0117572	-0.000902705			20.6229	20.3693	20.5711	20.7115	20.4572	20.3902	1	2	1	2	1	3
Y62E10A.6	WBGene00013376	Y62E10A.6	-0.00176667	0.0090004	-0.0273521	-0.00112916			20.3263	20.251	20.2446	20.1895	20.3865	20.2406	1	2	3	1	3	3
T12E12.1	WBGene00020462	T12E12.1	-0.0021	0.00453864	-0.0138621	-0.00127158			21.3365	21.0517	21.5074	21.1909	21.4358	21.2626	1	1	2	2	4	2
Y55F3AM.13	WBGene00021930	Y55F3AM.13	-0.0021	0.00873757	-0.0265612	-0.0013299			26.5318	26.5267	26.7443	26.6179	26.534	26.6446	14	14	13	15	16	15
T21B10.3	WBGene00011885	T21B10.3	-0.00223333	0.00601587	-0.0183434	-0.00137711			22.6611	22.3381	22.7029	22.6073	22.6013	22.4868	3	5	4	4	3	3
T24B8.2	WBGene00011976	T24B8.2	-0.0025	0.00935284	-0.0284121	-0.00157432			20.1452	20.0022	20.2527	20.1084	20.2261	20.0581	1	1	2	1	2	2
T05H10.1	WBGene00011507	T05H10.1	-0.00273333	0.0106207	-0.0322182	-0.00172468			22.5135	22.6266	22.4881	22.5251	22.421	22.6739	3	6	7	7	10	8
F17A9.2	WBGene00017534	F17A9.2	-0.0036	0.00666993	-0.0203227	-0.00214651			22.6844	23.179	23.1852	23.0213	22.901	23.1155	4	7	6	9	7	5
gpb-2	WBGene00001680	F52A8.2	-0.00426667	0.00713466	-0.0217274	-0.00251517			21.7145	21.4247	22.0489	21.8796	21.6624	21.6333	1	2	2	2	3	3
ufd-3	WBGene00007333	C05C10.6a	-0.00613333	0.00662592	-0.0201896	-0.00340026			24.0176	23.0215	23.7138	23.5011	23.5082	23.7252	5	9	8	9	10	10
C05C10.5c	WBGene00007332	C05C10.5c	-0.0072	0.00408766	-0.0124911	-0.00346752			19.9116	18.3777	19.4837	19.9528	18.8832	18.9154	1	1	1	1	1	1
rps-13	WBGene00004482	C16A3.9	-0.00816667	0.00933569	-0.0283605	-0.00456759			29.5584	30.5361	30.1376	29.9794	30.0822	30.146	28	31	32	31	31	31
mlc-2	WBGene00003370	C36E6.5	-0.00823333	0.0130181	-0.0393866	-0.00481752			19.7618	20.0397	19.7089	19.4697	20.0621	19.9539	1	1	1	1	1	1
C46F11.4	WBGene00008119	C46F11.4	-0.0096	0.0236065	-0.0706134	-0.00586814			22.5498	22.3861	22.6416	22.6698	22.5844	22.2945	2	3	3	3	4	2
rab-33	WBGene00004283	F43D9.2	-0.0125333	0.00732823	-0.0223121	-0.00607904			18.2341	18.0234	19.4258	18.1051	19.247	18.2936	NA	NA	NA	NA	1	1
sec-10	WBGene00016376	C33H5.9	-0.0113667	0.051754	-0.150494	-0.00721451			20.6008	20.5236	20.71	20.6217	20.6787	20.4999	1	1	1	2	3	2
asns-1	WBGene00003816	F25G6.6	-0.0134	0.0176606	-0.0531636	-0.00764817			19.8792	20.0259	19.8699	19.6721	20.4054	19.6573	NA	2	1	3	3	3
npp-15	WBGene00003801	C29E4.4	-0.0138667	0.0178381	-0.0536878	-0.00788648			21.6279	22.1749	21.7157	21.8016	21.5009	22.1744	2	2	3	4	2	4
F41H10.3d	WBGene00018316	F41H10.3d	-0.0137	0.0195992	-0.0588768	-0.00790678			24.762	25.1113	24.7161	25.2337	24.5868	24.7278	2	3	3	3	3	2
D2045.2	WBGene00008422	D2045.2	-0.0132667	0.0267979	-0.0798919	-0.00796291			22.904	23.1099	23.3606	23.2929	23.0969	22.9449	7	9	8	9	13	13
mdt-19	WBGene00007019	Y71H2B.6	-0.0126667	0.0658218	-0.188903	-0.00808311			20.9978	20.8744	21.0424	20.8701	21.0009	21.0056	1	1	3	2	1	3
rpac-19	WBGene00010230	F58A4.9	-0.0135	0.0325328	-0.0964163	-0.00823162			23.0704	22.6357	22.9939	22.8116	22.8965	22.9514	4	4	4	3	2	3
F13B9.1c	WBGene00017419	F13B9.1c	-0.0134667	0.0645769	-0.185541	-0.00856342			23.7183	23.4937	23.572	23.6167	23.5203	23.6066	5	6	6	7	9	8
sqv-1	WBGene00005019	D2096.4b	-0.0164	0.0278338	-0.0828905	-0.00965927			19.2281	19.8404	19.7217	19.4543	19.6343	19.6524	1	1	1	1	1	1
zyg-9	WBGene00006994	F22B5.7	-0.0168	0.0298161	-0.088612	-0.00994324			24.7347	24.0972	24.5006	24.3695	24.4928	24.4198	8	15	15	15	20	19
cyn-3	WBGene00000879	Y75B12B.5	-0.0185667	0.0214909	-0.0644293	-0.010383			23.5337	24.3767	23.6004	24.0009	23.7943	23.6599	3	5	5	4	7	5
tag-147	WBGene00006493	R09A8.3	-0.0187667	0.0264384	-0.0788495	-0.0107978			26.2011	26.4567	26.3851	25.8968	26.6569	26.4329	17	24	21	23	25	26
lig-4	WBGene00002986	C07H6.1	-0.0207667	0.0272182	-0.0811093	-0.0118259			19.1133	18.9534	18.5889	18.4733	19.1584	18.9616	1	1	1	1	1	1
txl-1	WBGene00021826	Y54E10A.3	-0.0235333	0.0191627	-0.0575922	-0.01233			22.8705	24.2358	23.4257	23.3316	23.4584	23.6714	3	9	4	6	9	8
T28H10.3	WBGene00012144	T28H10.3	-0.0214	0.0361618	-0.106777	-0.0125851			26.7892	26.2979	26.5936	26.7961	26.3118	26.5086	11	11	10	10	13	13
imb-3	WBGene00002077	C53D5.6	-0.0209333	0.0588268	-0.169922	-0.0128964			25.4101	25.0253	25.0953	25.088	25.1973	25.1826	15	16	16	18	20	23
snr-1	WBGene00004914	Y116A8C.42	-0.0239333	0.0399003	-0.117375	-0.0140462		+	25.756	26.226	26.224	25.8941	25.9346	26.3055	12	12	14	16	12	11
Y69H2.7a	WBGene00013482	Y69H2.7a	-0.0254	0.0342453	-0.101315	-0.0145085			21.1936	21.9855	21.4511	21.3354	21.5897	21.6289	2	2	2	4	3	2
mrpl-37	WBGene00013004	Y48E1B.5	-0.0256	0.0386564	-0.113858	-0.0148419			23.8647	24.2043	24.3222	23.7628	24.3625	24.1891	7	8	7	8	6	7
usp-14	WBGene00006856	C13B4.2	-0.0243667	0.0725903	-0.20706	-0.0150627			26.9573	26.7021	26.9214	27.0087	26.7414	26.7576	26	30	29	30	29	28
ZK1098.1b	WBGene00014218	ZK1098.1b	-0.0370667	0.0131291	-0.0397178	-0.0152334			17.6708	19.929	20.6983	18.9734	19.6614	19.5521	NA	1	1	1	1	2
B0491.5	WBGene00007192	B0491.5	-0.0277333	0.0391147	-0.115155	-0.015931			24.8191	24.1833	24.7707	24.6696	24.3095	24.7108	6	8	7	6	10	10
crml-1	WBGene00010641	K07G5.1	-0.0483667	0.0108516	-0.0329103	-0.016287			19.009	20.3018	20.8557	17.2823	21.4837	21.2554	1	1	1	1	2	1
vha-5	WBGene00006914	F35H10.4	-0.0446	0.0126552	-0.0383041	-0.0167394			17.7718	21.0472	21.3938	20.0701	20.2714	19.7375	NA	2	1	2	3	2
dbr-1	WBGene00000937	C55B7.8	-0.0323667	0.0265473	-0.0791653	-0.0169561			20.4416	19.8787	21.1296	20.8272	20.2099	20.3157	1	1	1	1	1	1
W08E3.2	WBGene00012343	W08E3.2	-0.0299	0.0410831	-0.120713	-0.0171082			24.2864	23.5502	24.0089	24.1655	23.7849	23.8054	5	5	5	5	5	4
dpy-18	WBGene00001077	Y47D3B.10	-0.0303	0.0395079	-0.116267	-0.01721			20.5485	20.5309	19.8673	20.1458	20.5509	20.1591	1	2	2	2	2	2
efhd-1	WBGene00012980	Y48B6A.6a	-0.0578333	0.0107333	-0.0325556	-0.0176512			19.3035	24.2535	20.5248	20.0608	23.2125	20.635	1	12	3	2	13	7
ril-1	WBGene00008262	C53A5.1	-0.0374667	0.0532005	-0.154487	-0.0215014			26.3419	25.7155	26.391	26.0994	25.9326	26.304	10	9	10	10	13	12
evl-14	WBGene00001352	H38K22.1	-0.0364667	0.0835528	-0.236051	-0.0220411			21.1186	21.2155	21.3784	21.1367	21.4596	21.0068	1	3	4	3	3	3
K01G5.9	WBGene00010480	K01G5.9	-0.0344667	0.210222	-0.542509	-0.0220441			22.0283	22.1496	22.07	22.1468	22.0307	21.967	2	3	5	4	3	3
D2085.3	WBGene00008428	D2085.3	-0.0396333	0.0549476	-0.159296	-0.0226631			20.4907	20.1136	20.4708	20.0324	20.1805	20.7433	1	1	1	2	2	1
Y48B6A.1	WBGene00012978	Y48B6A.1	-0.0493	0.0280717	-0.0835784	-0.02359			19.6037	20.1423	19.6556	20.7089	19.7898	18.755	NA	1	1	1	1	NA
npp-23	WBGene00007493	C09G9.2a	-0.0385	0.131856	-0.358414	-0.0239515			23.0904	22.8849	23.0127	22.9137	22.8297	23.1291	3	3	3	4	6	6
lpr-3	WBGene00012261	W04G3.8	-0.0414	0.0943924	-0.26424	-0.0249898			25.5956	25.1538	25.3961	25.4555	25.1614	25.4044	14	16	13	22	21	20
let-502	WBGene00002694	C10H11.9	-0.0415	0.142846	-0.385188	-0.0258126			22.8601	22.5681	22.7911	22.7802	22.7379	22.5767	5	6	4	4	6	6
B0238.10	WBGene00015074	B0238.10	-0.0481333	0.0480392	-0.140192	-0.0261121			22.0171	23.0823	22.9976	22.6664	22.6972	22.589	3	3	3	3	4	3
tpp-2	WBGene00017686	F21H12.6	-0.0472667	0.06629	-0.190166	-0.0270318			25.4761	26.18	25.4012	25.6489	25.6589	25.6077	15	30	20	31	26	32
taf-12	WBGene00006396	Y56A3A.4b	-0.0445667	0.238132	-0.604838	-0.02832			20.7948	20.6214	20.8111	20.7776	20.6796	20.6364	2	2	1	3	3	4
wdr-5.1	WBGene00006474	C14B1.4	-0.0444667	0.285144	-0.706912	-0.0284513			24.4142	24.4968	24.4785	24.5098	24.4345	24.3118	7	8	8	7	8	11
ttb-1	WBGene00006648	W03F9.5	-0.0487	0.0939117	-0.262999	-0.0288991			22.1588	21.7461	21.9517	22.1718	21.69	21.8487	3	2	3	2	2	1
mdh-1	WBGene00018491	F46E10.10a	-0.0490333	0.0924814	-0.259303	-0.0290293			22.774	22.6047	22.2223	22.3079	22.51	22.636	3	3	4	3	5	4
pdi-6	WBGene00015168	B0403.4	-0.0469667	0.178563	-0.469925	-0.0293552			29.1473	29.1204	29.3941	29.2239	29.0756	29.2214	37	42	41	46	45	47
egg-1	WBGene00015083	B0244.8	-0.0474667	0.157207	-0.419657	-0.0294256			21.5274	21.3449	21.2009	21.1953	21.4089	21.3266	1	2	1	1	2	1
F52B5.2	WBGene00009921	F52B5.2	-0.0475333	0.202388	-0.524747	-0.0298842			26.6679	26.4681	26.4207	26.5516	26.482	26.3805	18	20	21	23	19	16
sas-6	WBGene00012888	Y45F10D.9	-0.0728	0.0269605	-0.080363	-0.0302591			19.8312	19.0503	17.946	17.4878	19.9246	19.1967	1	NA	NA	NA	1	1
unc-18	WBGene00006757	F27D9.1a	-0.0495667	0.133962	-0.363573	-0.0302913			23.2092	23.2261	23.4368	23.0232	23.4138	23.2864	4	5	5	7	7	6
emb-4	WBGene00001258	Y80D3A.2a	-0.0508333	0.120233	-0.329698	-0.0307302			23.7998	23.3712	23.745	23.4397	23.6832	23.6406	5	5	4	10	11	7
asns-2	WBGene00019730	M02D8.4a	-0.0512667	0.113325	-0.312427	-0.0308076			27.8113	28.2777	28.0925	27.8257	28.1201	28.0819	34	45	40	45	46	48
unc-37	WBGene00006773	W02D3.9	-0.0504667	0.150294	-0.403136	-0.0310529			25.4947	25.1544	25.198	25.2309	25.1196	25.3452	11	15	17	17	16	14
epc-1	WBGene00007030	Y111B2A.11	-0.051	0.138966	-0.375777	-0.031179			20.3386	20.0499	20.3368	20.2741	20.2989	19.9993	1	1	2	2	2	2
tag-325	WBGene00008006	C38D4.5	-0.0505667	0.175834	-0.463563	-0.0314258			21.2264	21.131	21.2979	20.974	21.2871	21.2425	1	2	2	1	1	1
uba-1	WBGene00006699	C47E12.5c	-0.0564667	0.0758046	-0.215613	-0.0320489			23.1611	22.8583	22.4015	22.8429	22.4738	22.9348	4	9	3	9	9	10
rab-6.1	WBGene00004269	F59B2.7	-0.0559	0.0900924	-0.253112	-0.0324839			23.0356	22.7522	23.4467	23.0213	23.1789	22.8666	3	3	3	4	4	3
DY3.8	WBGene00008440	DY3.8	-0.0607333	0.0578187	-0.167167	-0.0325944			20.411	20.0547	20.5718	20.2952	20.8509	19.7092	1	1	1	1	1	1
mdt-4	WBGene00007012	ZK546.13	-0.0529333	0.203304	-0.526829	-0.0330735			20.8171	21.1098	21.037	21.0319	20.8814	20.8918	1	3	1	2	2	2
F44E7.9	WBGene00018431	F44E7.9	-0.0605667	0.0701299	-0.200483	-0.0336089			22.0874	21.4129	21.7902	21.2589	21.817	22.0329	1	1	1	1	1	1
dcr-1	WBGene00000939	K12H4.8	-0.0593333	0.0796144	-0.225693	-0.0336568			21.5565	21.1238	21.1169	20.8355	21.5937	21.19	2	1	1	2	4	4
B0035.3	WBGene00007106	B0035.3	-0.0651667	0.0536809	-0.155811	-0.0339721			24.8769	23.6805	24.4042	24.7188	23.999	24.0483	6	7	6	9	7	6
Y49E10.4	WBGene00013030	Y49E10.4	-0.0573333	0.115396	-0.31762	-0.0341166			23.9135	23.4767	23.8854	23.9039	23.5152	23.6845	6	6	9	10	11	14
F39H2.3	WBGene00009563	F39H2.3	-0.0534667	0.440074	-1.02568	-0.0344473			25.1195	25.1023	25.1684	25.0009	25.0627	25.1662	10	14	12	15	15	13
met-2	WBGene00019883	R05D3.11	-0.0553	0.208574	-0.538782	-0.0345056			21.238	21.0824	21.2728	21.2699	20.9831	21.1743	1	4	2	3	3	3
T20D3.3b	WBGene00011857	T20D3.3b	-0.0707	0.047526	-0.138764	-0.0351829			19.3636	18.6038	18.655	17.9134	19.3141	19.1828	NA	NA	NA	NA	1	1
mig-10	WBGene00003243	F10E9.6a	-0.0620333	0.0843677	-0.238186	-0.0352374			21.3564	21.5055	22.0274	21.3369	21.8816	21.4847	1	2	3	2	2	2
mrpl-17	WBGene00021829	Y54E10A.7	-0.0616667	0.0883517	-0.248587	-0.035277			20.8896	20.4339	21.266	20.9126	20.7043	20.7876	1	1	1	2	2	2
C15H9.4	WBGene00015800	C15H9.4	-0.0726	0.056243	-0.162852	-0.0373111			20.7464	20.4118	20.4653	21.3324	19.9714	20.1019	1	1	3	2	1	1
Y17G7B.17	WBGene00012468	Y17G7B.17	-0.0663	0.0905333	-0.254256	-0.0376542			21.7104	22.1749	21.4242	21.9843	21.5996	21.5267	1	3	2	2	2	2
ife-2	WBGene00002060	R04A9.4	-0.0607333	0.256095	-0.644238	-0.0380947			24.8534	24.8596	24.8342	24.9716	24.6607	24.7327	8	9	9	8	8	8
cct-5	WBGene00000380	C07G2.3a	-0.0735667	0.0645029	-0.185341	-0.0387821			26.0961	27.4364	26.503	26.5841	26.6264	26.6043	24	35	23	30	31	27
Y71H2AR.1	WBGene00022188	Y71H2AR.1	-0.0744	0.062253	-0.179247	-0.0388498			21.0927	21.9343	21.4098	20.8891	22.0323	21.2922	2	3	3	2	1	1
rnr-2	WBGene00004392	C03C10.3	-0.0694333	0.0881159	-0.247974	-0.0390074			22.2057	21.6392	21.8874	21.4175	22.1941	21.9124	2	3	3	4	4	4
F14E5.2b	WBGene00008800	F14E5.2b	-0.0734333	0.0669608	-0.191973	-0.039008			23.7367	22.5285	23.0692	22.7292	23.1585	23.2264	7	5	4	6	5	5
ucr-2.2	WBGene00011679	T10B10.2	-0.061	0.491598	-1.12798	-0.0392515			29.055	29.2317	29.1209	29.0474	29.0733	29.1039	28	36	32	36	37	31
cco-2	WBGene00012553	Y37D8A.14	-0.0642	0.205093	-0.530893	-0.0396069			27.4917	27.0973	27.3297	27.1708	27.3053	27.25	15	16	14	15	14	15
tsg-101	WBGene00015658	C09G12.9	-0.0651333	0.184953	-0.484752	-0.0398524			24.9011	24.5676	24.8047	24.8621	24.6643	24.5516	10	8	9	12	10	10
puf-12	WBGene00014165	ZK945.3	-0.0660333	0.180049	-0.473382	-0.0402767			21.521	21.9029	21.8485	21.6878	21.568	21.8185	2	3	2	2	5	3
lpr-5	WBGene00012256	W04G3.2	-0.0669	0.15973	-0.425656	-0.0403701			23.8193	23.3632	23.3875	23.5613	23.4077	23.4003	5	8	6	6	8	4
dnc-1	WBGene00001017	ZK593.5c	-0.0755333	0.0867285	-0.244357	-0.0417517			18.8289	18.6999	18.5634	18.9514	18.024	18.8902	1	NA	1	1	1	1
mrpl-9	WBGene00015025	B0205.11	-0.0695333	0.164642	-0.437289	-0.0419125			23.0059	23.2031	22.8691	23.0192	23.1366	22.7137	3	4	4	5	5	4
emo-1	WBGene00001303	F32D8.6	-0.0725667	0.134818	-0.365666	-0.0427252			21.5009	20.9542	21.5518	21.1698	21.2666	21.3528	3	3	3	2	4	4
hpo-27	WBGene00016418	C34G6.1	-0.0702	0.19419	-0.506024	-0.0428381			18.7048	18.9342	18.7749	18.4975	18.8103	18.8955	NA	1	NA	1	1	1
D2005.7	WBGene00086551	D2005.7	-0.0753667	0.106484	-0.295162	-0.0429357			23.1858	22.8304	23.0908	23.396	22.6033	22.8816	3	3	4	4	4	3
ucr-1	WBGene00018963	F56D2.1	-0.0702667	0.217865	-0.559721	-0.0432267			29.1271	29.0374	29.3871	29.1606	28.9777	29.2025	47	60	56	55	63	65
W09C5.8	WBGene00012354	W09C5.8	-0.0761	0.108142	-0.29936	-0.0433814			25.3744	24.6362	25.0945	24.9922	24.7096	25.175	4	4	5	7	6	7
C45G9.5	WBGene00016676	C45G9.5	-0.0737667	0.158761	-0.423354	-0.0440597			22.0243	21.5579	21.73	21.4903	21.7418	21.8588	1	3	3	2	2	1
aqp-2	WBGene00000170	C01G6.1a	-0.0758667	0.127831	-0.348518	-0.044168			22.0353	21.5982	22.3198	21.8213	21.8864	22.018	1	2	1	2	2	2
Y82E9BR.18	WBGene00022350	Y82E9BR.18	-0.0756	0.142155	-0.383516	-0.044546			23.8207	24.0263	23.8411	23.4511	24.043	23.9672	5	9	6	6	7	7
mdt-30	WBGene00004125	F44B9.7	-0.0786	0.127801	-0.348443	-0.04555			21.8749	21.5773	21.9554	21.34	21.8666	21.9652	2	4	3	3	2	2
npp-10	WBGene00003796	ZK328.5b	-0.0755	0.389118	-0.923077	-0.0477307			24.4106	24.4228	24.3133	24.2915	24.1867	24.442	12	12	12	13	14	12
sip-1	WBGene00004798	F43D9.4	-0.0816	0.166255	-0.441094	-0.0484275			31.0503	31.633	31.3667	31.4127	31.152	31.2405	56	57	56	55	55	57
tln-1	WBGene00006771	Y71G12B.11a	-0.0759667	0.509805	-1.16387	-0.0485326			25.6	25.6273	25.4484	25.4968	25.5333	25.4177	23	33	28	32	33	29
F23C8.5a	WBGene00017734	F23C8.5a	-0.0908	0.0899473	-0.252736	-0.0488364			21.5846	21.8903	20.8417	21.0992	21.249	21.696	2	2	2	1	1	2
pqn-20	WBGene00004110	C37A2.2	-0.0949667	0.0768661	-0.218427	-0.0490841			19.6446	18.6551	19.9418	19.074	19.7026	19.18	1	1	1	1	1	1
drr-2	WBGene00011730	T12D8.2	-0.1287	0.0402114	-0.118254	-0.049723			20.8082	18.0109	17.2993	18.1964	18.7052	18.8307	NA	1	NA	1	NA	1
mrpl-21	WBGene00023422	F43C1.6	-0.079	0.385037	-0.914781	-0.0497996			23.5821	23.5359	23.538	23.4585	23.627	23.3335	4	4	3	3	4	4
mrps-5	WBGene00008452	E02A10.1	-0.0826667	0.247563	-0.625591	-0.0506492			23.6288	23.2821	23.3884	23.2686	23.5171	23.2656	3	4	4	5	6	8
rpl-22	WBGene00004434	C27A2.2a	-0.0918333	0.109013	-0.301564	-0.0508906			28.3075	29.3115	28.9607	28.9236	28.6694	28.7112	19	24	20	22	22	22
jhdm-1	WBGene00020821	T26A5.5a	-0.0865667	0.163417	-0.434393	-0.0509431			21.296	21.6822	21.7489	21.4746	21.7397	21.2531	2	4	2	3	5	4
rps-27	WBGene00004496	F56E10.4	-0.0835333	0.236295	-0.60078	-0.0509647			28.4679	28.8254	28.9023	28.6101	28.6112	28.7237	11	17	13	16	16	14
his-12	WBGene00001886	ZK131.6	-0.0893	0.142832	-0.385154	-0.0515632			27.6224	27.4617	28.2223	27.6649	27.6666	27.707	11	14	11	10	11	11
B0272.3	WBGene00007129	B0272.3	-0.091	0.130808	-0.355841	-0.0518302			18.68	19.3472	19.106	18.7278	18.8567	19.2757	NA	1	NA	1	1	1
R148.3a	WBGene00020102	R148.3a	-0.0839333	0.29136	-0.720169	-0.0519214			26.2188	25.9112	26.0631	25.9057	25.9042	26.1314	23	24	23	24	27	26
C01G5.5	WBGene00015307	C01G5.5	-0.0854	0.368646	-0.881335	-0.0534787			26.367	26.2152	26.423	26.3865	26.2319	26.1306	18	19	17	16	16	15
exc-9	WBGene00017644	F20D12.5	-0.0887667	0.216497	-0.556649	-0.0534911			24.9062	24.5679	24.8821	24.4676	24.7748	24.8475	4	5	5	6	5	4
T14F9.2	WBGene00020508	T14F9.2	-0.0872333	0.357439	-0.858336	-0.0544653			23.0781	23.0812	23.3112	22.9429	23.1657	23.1002	4	8	7	6	6	6
pdcd-2	WBGene00011116	R07E5.10a	-0.0962	0.134922	-0.365919	-0.0545692			22.4882	22.1691	21.7599	22.3557	21.8606	21.9123	2	3	3	3	2	1
alp-1	WBGene00001132	T11B7.4a	-0.0987	0.156182	-0.417217	-0.0568363			21.6011	20.9989	21.561	21.3837	21.459	21.0222	2	2	3	2	2	2
T27A3.7	WBGene00020843	T27A3.7	-0.0996667	0.158261	-0.422167	-0.0574089			19.8033	19.2588	19.447	19.1904	19.748	19.2717	NA	1	1	2	1	2
vha-1	WBGene00006910	R10E11.8	-0.1039	0.129022	-0.351451	-0.0578626			22.8675	22.1574	22.9505	22.2453	22.6883	22.7301	2	2	2	2	2	2
T09B4.5a	WBGene00020379	T09B4.5a	-0.0912667	0.565841	-1.27372	-0.0580705			26.718	26.8226	26.7471	26.5594	26.6716	26.7829	12	12	12	12	10	9
T13C2.6a	WBGene00020481	T13C2.6a	-0.108033	0.115694	-0.318368	-0.058735			21.0882	21.0002	21.933	20.9705	21.5329	21.1939	2	4	2	3	3	3
nmy-1	WBGene00003776	F52B10.1	-0.1445	0.0528438	-0.153504	-0.0591887			26.1741	28.1098	26.0814	25.7202	27.9465	26.2651	26	80	38	35	89	46
ebp-2	WBGene00012156	VW02B12L.3	-0.100833	0.191422	-0.49967	-0.059251			23.4111	22.8741	23.4293	23.1724	22.9723	23.2673	6	7	8	7	5	9
clec-88	WBGene00019606	K10B2.3a	-0.112867	0.100842	-0.280798	-0.0593426			23.9678	24.7197	23.582	23.848	24.4122	23.6707	4	7	5	4	7	7
tbc-20	WBGene00013196	Y54E2A.12a	-0.123367	0.0750991	-0.213739	-0.0593913			22.8667	22.2355	20.9558	21.9526	22.0892	21.6461	3	5	4	3	3	3
arx-1	WBGene00000199	Y71F9AL.16	-0.1026	0.179634	-0.472417	-0.0597491			19.7175	19.883	19.4078	19.8738	19.5258	19.3009	1	2	1	1	2	1
dmd-4	WBGene00007776	C27C12.6	-0.104567	0.159468	-0.425035	-0.0598886			26.3629	27.1923	26.861	26.7808	26.7107	26.611	1	2	1	1	2	1
sut-2	WBGene00022019	Y61A9LA.8	-0.0989667	0.328427	-0.798253	-0.0609408			23.7774	23.3969	23.6954	23.5414	23.4396	23.5918	6	8	6	8	7	5
dpy-30	WBGene00001088	ZK863.6	-0.103633	0.209886	-0.541749	-0.0612746			27.4705	27.025	27.1539	27.1357	27.3398	26.863	6	10	8	10	10	10
eif-3.G	WBGene00001230	F22B5.2b	-0.102533	0.23229	-0.591908	-0.0612789			24.6259	24.6061	24.3444	24.6234	24.1351	24.5103	7	8	8	11	9	9
pbrm-1	WBGene00007042	C26C6.1a	-0.0984667	0.480546	-1.10614	-0.061967			25.8713	25.7536	25.5898	25.6481	25.6967	25.5745	17	25	20	32	26	26
pabp-2	WBGene00003904	C17E4.5	-0.1021	0.320465	-0.781613	-0.0626139			24.1103	23.9158	24.0734	24.1618	23.7914	23.84	4	4	4	4	3	3
daf-25	WBGene00000917	Y48G1A.3	-0.104467	0.253623	-0.638846	-0.0627984			22.8749	22.8493	22.9678	22.6239	23.1117	22.643	4	7	4	8	6	5
hmg-1.1	WBGene00001971	Y48B6A.14	-0.118567	0.111203	-0.307089	-0.0628634			27.8742	28.5278	27.3956	27.505	27.7391	28.1978	16	20	19	19	25	24
ntl-3	WBGene00003826	Y56A3A.1a	-0.0997	0.629514	-1.39789	-0.0634498			26.0345	25.993	26.0588	26.0217	25.7949	25.9706	17	20	20	22	24	19
mvb-12	WBGene00015508	C06A6.3	-0.1104	0.175394	-0.462538	-0.0634963			23.2026	22.3844	22.8674	22.7503	22.6673	22.7056	5	4	5	5	5	5
pod-1	WBGene00004075	Y76A2B.1a	-0.100333	0.605204	-1.35053	-0.0637323			27.5782	27.5485	27.6198	27.3839	27.6207	27.4409	31	40	35	38	48	41
F32B4.4b	WBGene00009314	F32B4.4b	-0.1119	0.168822	-0.447137	-0.0639334			22.0507	22.19	22.3303	21.8248	22.5518	21.8587	1	2	2	2	4	5
tpxl-1	WBGene00021470	Y39G10AR.12b	-0.1075	0.250144	-0.631243	-0.0643597			26.1165	26.2465	26.0834	25.7163	26.185	26.2226	16	14	15	15	17	16
rars-1	WBGene00004679	F26F4.10b	-0.109433	0.215511	-0.554432	-0.0644719			27.0804	26.531	27.1085	26.7494	26.7255	26.9167	29	32	30	34	38	34
enpl-1	WBGene00011480	T05E11.3b	-0.125333	0.103222	-0.286871	-0.0647083			23.1169	24.2022	22.7768	23.1699	23.1536	23.3964	3	11	5	9	7	9
ifb-2	WBGene00002054	F10C1.7c	-0.242933	0.0366431	-0.108146	-0.0648454			18.7987	23.5527	19.3403	18.9744	23.641	18.3475	1	7	2	2	9	1
pab-2	WBGene00003903	F18H3.3a	-0.104333	0.537125	-1.21752	-0.0657967			26.9836	27.1672	27.1848	27.1189	26.9695	26.9342	32	31	27	32	36	29
ebp-1	WBGene00013344	Y59A8B.7	-0.1096	0.327117	-0.79552	-0.0669202			26.4443	26.5034	26.6168	26.1755	26.6158	26.4444	14	19	18	20	20	22
rla-2	WBGene00004410	Y62E10A.1	-0.1193	0.163964	-0.435687	-0.067256			27.6845	28.3715	28.1847	27.7453	27.816	28.3215	13	18	15	14	19	16
npp-22	WBGene00007118	B0240.4	-0.1226	0.140875	-0.380412	-0.0672783			22.8911	21.794	22.5006	22.3151	22.2196	22.2832	3	3	3	2	4	2
Y37E11B.3b	WBGene00021376	Y37E11B.3b	-0.132267	0.107966	-0.298914	-0.0680913			18.4621	19.2017	19.9389	19.2986	19.0036	18.9037	NA	1	1	1	1	1
T19A5.1	WBGene00020553	T19A5.1	-0.1255	0.134861	-0.36577	-0.0680914			18.9502	18.694	18.0875	18.9091	18.2232	18.2229	NA	1	NA	1	2	1
cytb-5.2	WBGene00020931	W02D3.1	-0.112133	0.317506	-0.775411	-0.0681823			23.1289	22.73	23.0288	22.998	22.7189	22.8344	2	3	2	3	3	3
mppa-1	WBGene00022159	Y71G12B.24a	-0.123533	0.169752	-0.449323	-0.0695989			21.4132	21.5048	21.353	20.7613	21.5133	21.6258	1	2	2	2	2	3
T23B5.4a	WBGene00011941	T23B5.4a	-0.149867	0.0823243	-0.232827	-0.0699109			20.4961	18.3867	19.9887	19.3007	19.4699	19.6513	1	NA	1	1	1	1
pps-1	WBGene00004091	T14G10.1a	-0.118367	0.247844	-0.626205	-0.07008			18.8834	19.4823	19.0158	18.9466	18.967	19.1128	NA	1	1	1	1	1
nkb-1	WBGene00007646	C17E4.9	-0.120967	0.240842	-0.610817	-0.071239			24.4319	23.7505	24.0243	23.9429	23.959	23.9419	10	7	7	7	6	6
pinn-1	WBGene00022448	Y110A2AL.13	-0.129767	0.156592	-0.418193	-0.0716823			23.7267	22.9594	23.2728	23.6215	22.9567	22.9914	3	3	3	4	3	2
nos-3	WBGene00003785	Y53C12B.3a	-0.1152	0.570515	-1.28285	-0.0724619			23.0749	23.0186	23.205	22.9011	22.9266	23.1252	1	3	2	4	4	4
gei-8	WBGene00001565	C14B9.6c	-0.1259	0.2088	-0.539294	-0.0726296			21.6118	21.4973	22.0946	21.8985	21.4655	21.462	4	5	4	3	5	5
mnp-1	WBGene00007139	B0285.7	-0.189367	0.059919	-0.1729	-0.0729671			19.5799	17.3251	20.1801	17.5103	19.4104	19.5963	1	NA	1	NA	2	2
pqn-80	WBGene00004161	Y111B2A.14a	-0.123833	0.310078	-0.759801	-0.0744647			22.3657	22.1867	22.7229	22.326	22.2203	22.3575	3	6	7	7	5	6
mes-2	WBGene00003220	R06A4.7	-0.127667	0.235626	-0.599299	-0.074527			20.9958	20.503	20.5814	20.8072	20.2957	20.5943	3	2	2	2	1	1
F18C12.3	WBGene00008934	F18C12.3	-0.131733	0.189691	-0.495685	-0.0746043			20.2464	20.1598	20.6515	20.5359	20.3251	19.8015	2	1	2	2	2	1
F44E5.1	WBGene00009688	F44E5.1	-0.133833	0.176943	-0.46615	-0.0748884			26.3143	25.5752	25.972	25.6468	25.61	26.2032	6	7	6	7	7	5
rpia-1	WBGene00015101	B0280.3	-0.147267	0.115081	-0.316833	-0.0749521			19.11	20.1356	19.8193	20.0393	19.7233	18.8605	NA	1	1	1	1	1
ogdh-1	WBGene00020679	T22B11.5b	-0.134	0.185521	-0.486065	-0.0754639			24.1391	25.0147	24.2957	24.43	24.2375	24.38	9	13	12	11	15	10
dnc-5	WBGene00022118	Y71F9AL.14	-0.1178	1.14316	-2.4308	-0.0760755			23.3106	23.4038	23.2666	23.261	23.1945	23.1721	4	5	5	5	5	5
snr-4	WBGene00004917	C52E4.3	-0.1164	1.87811	-4.24222	-0.076206		+	25.7058	25.6533	25.6968	25.5333	25.6095	25.5639	13	13	10	12	14	12
smg-8	WBGene00010551	K04B12.3b	-0.118233	1.2881	-2.74742	-0.0766239			22.313	22.224	22.2673	22.2187	22.1108	22.1201	2	4	3	5	5	4
elc-1	WBGene00001236	Y82E9BR.15	-0.121067	0.72895	-1.59173	-0.076816			26.7316	26.5299	26.6175	26.5769	26.4122	26.5267	17	17	15	15	13	13
lec-1	WBGene00002264	W09H1.6a	-0.1632	0.09735	-0.271853	-0.0777023			24.4484	26.0335	24.8233	24.5318	25.6623	24.6215	9	14	9	12	15	13
eif-3.I	WBGene00001232	Y74C10AR.1a	-0.1258	0.465314	-1.07595	-0.0778022			25.2216	25.5715	25.4008	25.2564	25.179	25.3811	9	11	8	12	11	13
pgp-2	WBGene00003996	C34G6.4	-0.1802	0.0812604	-0.23003	-0.0789182			19.3725	17.8549	19.4551	17.5508	19.1749	19.4162	NA	NA	1	NA	1	1
unc-84	WBGene00006816	F54B11.3a	-0.126067	0.628202	-1.39533	-0.0792698			21.1088	20.8461	20.9542	20.8234	20.7716	20.9359	3	3	3	2	5	3
ubql-1	WBGene00008852	F15C11.2b	-0.135367	0.265266	-0.664156	-0.079449			24.235	24.309	24.2711	24.4656	23.7669	24.1765	5	6	6	7	12	11
F26G5.1b	WBGene00017843	F26G5.1b	-0.138933	0.222569	-0.57026	-0.0796804			21.8487	22.396	22.6724	22.1123	22.2044	22.1836	3	4	4	4	5	5
F09E5.3	WBGene00017283	F09E5.3	-0.1595	0.116398	-0.32013	-0.0798204			20.7365	19.9625	19.3883	19.3776	19.7909	20.4403	1	1	NA	1	2	2
elpc-1	WBGene00022463	Y110A7A.16	-0.183733	0.0822651	-0.232671	-0.0802445			21.0325	18.2982	19.7323	19.4953	19.5172	19.4993	NA	1	NA	1	1	1
K02B12.7	WBGene00010500	K02B12.7	-0.137967	0.259516	-0.651683	-0.0806017			23.7349	23.0351	23.3321	23.3507	23.1608	23.1767	4	5	4	5	4	4
ztf-7	WBGene00009772	F46B6.7	-0.128367	0.705813	-1.54656	-0.0810907			25.2755	25.5434	25.396	25.3055	25.217	25.3073	12	13	13	15	15	14
acdh-10	WBGene00020366	T08G2.3	-0.1319	0.450627	-1.04674	-0.0811188			25.8571	25.6175	25.6017	25.7344	25.4068	25.5394	11	12	12	13	15	13
lin-53	WBGene00003036	K07A1.12	-0.130633	0.567767	-1.27748	-0.0815307			27.4684	27.4827	27.3068	27.4566	27.1787	27.2307	17	25	24	25	26	22
fln-2	WBGene00016006	C23F12.1d	-0.140467	0.284206	-0.704906	-0.0826629			23.4361	23.8779	23.4744	23.3307	23.7361	23.3002	6	11	8	7	10	7
T01H8.2	WBGene00011353	T01H8.2	-0.134233	0.479207	-1.10349	-0.082776			21.198	21.0382	21.2572	21.1611	20.828	21.1016	1	2	2	2	1	2
unc-43	WBGene00006779	K11E8.1l	-0.212767	0.0726602	-0.207246	-0.0842095			18.1037	19.3285	19.4836	19.7087	16.9008	19.668	NA	1	1	1	NA	1
npp-19	WBGene00003805	R06F6.5a	-0.1555	0.171339	-0.453047	-0.0843627			24.0906	23.1079	23.7534	23.8286	23.4722	23.1846	3	6	5	6	6	6
R09B3.2	WBGene00011155	R09B3.2	-0.146433	0.253844	-0.639328	-0.0846904			27.5097	27.0638	27.7813	27.2314	27.1935	27.4906	11	11	9	12	15	14
map-1	WBGene00003129	Y37E11AL.7a	-0.135067	0.688221	-1.51225	-0.0849842			29.0879	29.1197	29.3293	29.0263	28.9721	29.1333	46	42	45	46	42	39
pat-10	WBGene00003934	F54C1.7	-0.1787	0.108904	-0.301286	-0.0853748			21.8372	22.796	21.7446	21.6156	22.9093	21.3168	2	5	2	2	5	2
Y54E10A.6	WBGene00021828	Y54E10A.6	-0.147533	0.258808	-0.650143	-0.0854313			23.3369	23.8462	23.9494	23.3152	23.7154	23.6593	3	8	7	9	11	9
blos-1	WBGene00011872	T20G5.10	-0.172267	0.1229	-0.336324	-0.0856109			18.4799	20.0689	19.8102	19.5017	19.3236	19.0169	NA	1	1	1	1	1
lin-37	WBGene00003022	ZK418.4	-0.147933	0.276356	-0.688078	-0.0862588			22.3008	21.594	22.0471	21.728	21.9324	21.8377	2	2	2	2	2	2
gcn-1	WBGene00021697	Y48G9A.3	-0.1422	0.456567	-1.05856	-0.087008			27.2241	26.8005	27.0826	26.7945	26.9596	26.9265	49	59	53	64	72	70
D2030.4	WBGene00008414	D2030.4	-0.1406	0.568646	-1.2792	-0.0873339			25.1183	24.88	25.1968	24.9762	24.8148	24.9823	5	8	7	6	9	5
B0001.4	WBGene00007089	B0001.4	-0.157633	0.202999	-0.526136	-0.0875933			22.7371	22.9436	23.2446	22.2966	23.104	23.0518	5	4	2	2	4	4
rpl-12	WBGene00004424	JC8.3a	-0.145633	0.391103	-0.927105	-0.0878853			28.2915	28.6335	28.6096	28.1485	28.4285	28.5207	18	21	19	16	21	18
F25H8.2	WBGene00009132	F25H8.2	-0.1571	0.212302	-0.547205	-0.087908			22.3749	21.4585	22.2227	21.8346	21.9497	21.8005	4	4	3	3	5	4
F25D7.4	WBGene00009113	F25D7.4	-0.144833	0.442903	-1.03133	-0.0882897			27.3112	27.3935	27.238	27.0253	27.4352	27.0477	28	34	30	28	34	33
gpa-13	WBGene00001675	F18E2.5a	-0.2498	0.0668202	-0.191594	-0.0890935			21.1858	20.7247	18.911	17.8186	21.2014	21.0521	1	1	NA	NA	1	1
C11D2.4	WBGene00015702	C11D2.4	-0.1433	0.64995	-1.43769	-0.0895808			23.742	23.6244	23.6247	23.695	23.4815	23.3847	6	8	7	6	8	8
C41H7.3	WBGene00016573	C41H7.3	-0.196367	0.10261	-0.285312	-0.0897368			20.9106	20.6008	18.7734	20.2367	19.6909	19.7681	1	1	1	1	1	1
lsm-7	WBGene00003081	ZK593.7	-0.1645	0.192651	-0.502492	-0.0900202			24.1865	23.5905	23.3819	23.9486	23.1822	23.5346	4	4	4	7	5	6
dpy-14	WBGene00001075	H27M09.4	-0.149367	0.464824	-1.07497	-0.0911356			21.9337	21.778	21.7854	21.4364	21.8741	21.7385	3	3	2	3	3	3
mog-2	WBGene00003390	H20J04.8	-0.154667	0.324719	-0.790513	-0.0912136			25.2711	25.9126	25.7223	25.4186	25.4534	25.57	8	12	11	13	12	11
Y60A3A.9	WBGene00013360	Y60A3A.9	-0.160067	0.249447	-0.629718	-0.0912483			22.8821	22.3455	22.8082	22.4979	22.1988	22.8589	3	3	2	4	4	5
Y106G6H.5	WBGene00013718	Y106G6H.5	-0.1538	0.36418	-0.872181	-0.0917475			21.0087	21.2334	21.5445	21.0365	21.0139	21.2748	2	3	2	2	1	2
unc-1	WBGene00006741	K03E6.5a	-0.155833	0.32562	-0.792393	-0.091847			20.3815	20.0935	20.6881	20.0463	20.3669	20.2824	1	1	2	2	1	2
F58F9.7	WBGene00019060	F58F9.7	-0.203567	0.103853	-0.288477	-0.0922929			20.2709	20.326	20.2104	18.6621	20.6519	20.8826	1	1	1	NA	1	1
cua-1	WBGene00000834	Y76A2A.2b	-0.1727	0.178884	-0.470673	-0.0925052			22.1632	21	21.2246	21.4597	21.1659	21.2441	3	3	3	4	4	4
sdhb-1	WBGene00006433	F42A8.2	-0.143733	1.67779	-3.69104	-0.0933975			29.8265	29.9252	29.8369	29.7248	29.7561	29.6765	35	34	36	39	40	38
otub-4	WBGene00015249	B0546.2a	-0.1537	0.470929	-1.08709	-0.0936403			20.7047	20.3781	20.6199	20.6043	20.255	20.3823	1	1	1	1	1	1
rab-5	WBGene00004268	F26H9.6	-0.1698	0.215939	-0.555394	-0.0940341			21.7878	20.7422	21.1587	21.1254	21.0366	21.0173	2	2	2	2	3	4
C33C12.9	WBGene00016341	C33C12.9	-0.172567	0.21114	-0.544583	-0.0949798			19.1553	19.1551	18.4864	19.0647	18.3202	18.8942	NA	NA	NA	NA	1	1
ahcy-1	WBGene00019322	K02F2.2	-0.177567	0.185799	-0.486708	-0.0952186			24.8189	25.8088	24.6656	24.9321	24.7953	25.0332	10	16	9	11	14	12
Y50D4C.5	WBGene00021749	Y50D4C.5	-0.1728	0.215372	-0.554119	-0.0953723			21.0121	20.5895	20.4197	20.8756	20.6193	20.008	1	1	1	2	2	2
chd-7	WBGene00007053	T04D1.4	-0.149067	1.27873	-2.72646	-0.0958829			24.2417	24.0821	24.1906	24.0288	24.0671	23.9713	11	12	13	15	13	11
T03G6.1	WBGene00020194	T03G6.1	-0.151967	0.867105	-1.86382	-0.0960881			25.6576	25.6225	25.5357	25.4191	25.3474	25.5934	11	16	13	15	13	15
C16C10.4	WBGene00007625	C16C10.4	-0.165967	0.311571	-0.762944	-0.0966308			21.1101	20.7782	20.6512	20.5863	21.009	20.4463	2	2	1	1	2	2
F29C4.2	WBGene00017926	F29C4.2	-0.173433	0.232631	-0.592666	-0.0967479			24.6594	23.7894	24.6154	24.0655	24.1576	24.3208	3	3	3	4	4	4
hcf-1	WBGene00001827	C46A5.9	-0.151133	1.18958	-2.53054	-0.0968975			26.0155	25.8779	26.0417	25.8219	25.8841	25.7757	20	22	17	22	26	21
gsr-1	WBGene00008117	C46F11.2b	-0.1634	0.385718	-0.916166	-0.0973574			23.6166	23.935	23.4576	23.287	23.6001	23.6319	6	7	6	5	6	6
lin-40	WBGene00003025	T27C4.4d	-0.156667	0.654567	-1.44668	-0.0974117			27.161	27.3068	27.2462	27.2251	26.8898	27.1291	34	41	36	43	42	41
nxt-1	WBGene00003836	Y71F9AM.5b	-0.162	0.483864	-1.1127	-0.0984448			23.2703	23.4916	23.3392	23.0906	23.0599	23.4646	4	4	6	8	9	7
exc-7	WBGene00001368	F35H8.5	-0.1549	1.19341	-2.53883	-0.0992305			20.3544	20.303	20.3341	20.2183	20.2498	20.0587	1	1	1	1	1	1
F28F8.5a	WBGene00009223	F28F8.5a	-0.176733	0.26342	-0.660157	-0.0999785			21.2672	20.9446	20.937	20.9844	21.2296	20.4046	2	2	1	1	1	1
attf-4	WBGene00015477	C05D10.1b	-0.214667	0.133289	-0.361926	-0.102558			20.35	20.5371	20.7755	20.8114	19.1855	21.0217	2	1	2	1	1	1
prp-17	WBGene00018625	F49D11.1	-0.1719	0.480762	-1.10656	-0.103845			23.994	23.696	23.5548	23.412	23.6154	23.7017	5	9	7	7	8	8
rpt-3	WBGene00004503	F23F12.6	-0.168633	0.635307	-1.40917	-0.104116			27.5359	27.731	27.5333	27.6267	27.295	27.3726	28	33	30	34	33	31
tbc-14	WBGene00008444	E01G4.1	-0.186367	0.261462	-0.65591	-0.104458			22.7473	21.7762	22.1766	22.0086	22.0122	22.1202	2	2	3	4	3	3
pcn-1	WBGene00003955	W03D2.4	-0.165967	0.981987	-2.09505	-0.105094			27.9512	27.7581	27.7598	27.7314	27.5713	27.6685	16	19	20	20	18	20
set-29	WBGene00022371	Y92H12BR.6	-0.199967	0.195961	-0.510079	-0.105689			18.944	18.1274	17.6453	18.0541	18.2043	17.8584	NA	1	1	1	1	1
ZK809.3	WBGene00014086	ZK809.3	-0.1877	0.297333	-0.732862	-0.106883			24.9673	24.4218	24.6707	24.7154	24.0956	24.6857	6	5	5	7	7	7
dad-1	WBGene00000896	F57B10.10	-0.178467	0.464115	-1.07357	-0.107108			23.568	23.073	23.4585	23.3288	23.1386	23.0967	3	2	2	2	2	3
sur-6	WBGene00006352	F26E4.1	-0.1738	0.726846	-1.58762	-0.107986			27.8195	27.6265	27.8226	27.7542	27.4619	27.5311	34	35	33	35	32	34
sup-17	WBGene00006324	DY3.7	-0.2048	0.208281	-0.538121	-0.108902			21.8674	20.8858	20.8407	21.2882	20.665	21.0263	2	3	1	3	4	3
rpl-9	WBGene00004420	R13A5.8	-0.170667	1.22047	-2.59776	-0.109004			29.2704	29.3846	29.497	29.2184	29.2012	29.2204	27	35	32	40	33	33
unc-44	WBGene00006780	B0350.2f	-0.1903	0.31755	-0.775504	-0.10903			23.4212	24.1502	23.4574	23.3799	23.5975	23.4805	5	13	8	11	14	11
rpt-2	WBGene00004502	F29G9.5	-0.175033	0.832004	-1.79419	-0.109563			28.0511	28.3569	28.1496	28.0682	27.9407	28.0236	40	44	49	44	42	45
sec-8	WBGene00004753	Y106G6H.7	-0.227967	0.146827	-0.3948	-0.109735			18.7474	17.816	19.6946	18.2301	18.9019	18.4421	NA	1	NA	1	1	1
F12F6.7	WBGene00008722	F12F6.7	-0.1834	0.485128	-1.1152	-0.110186			23.3434	22.8873	23.0723	22.7228	23.0222	23.0078	6	8	8	9	7	8
C07A12.7b	WBGene00015561	C07A12.7b	-0.1856	0.431415	-1.00836	-0.11021			22.5064	21.9496	22.086	21.8431	22.0617	22.0804	4	3	5	6	5	5
R74.7	WBGene00011281	R74.7	-0.181167	0.589808	-1.32051	-0.110657			21.2818	21.0589	21.0482	20.7382	21.1305	20.9767	1	3	2	1	2	2
mab-20	WBGene00003111	Y71G12B.20a	-0.1821	0.559088	-1.26052	-0.110735			25.1275	25.0471	25.0718	24.6382	25.1284	24.9335	10	12	9	11	12	12
imp-1	WBGene00007979	C36B1.12b	-0.1909	0.384062	-0.912798	-0.111694			20.8893	20.4	20.8477	20.5782	20.728	20.2581	2	1	2	2	3	2
C28H8.3	WBGene00016194	C28H8.3	-0.1964	0.312405	-0.764699	-0.111792			20.4401	19.6171	20.2232	19.7861	19.8707	20.0344	1	4	1	1	1	2
immt-1	WBGene00020511	T14G11.3	-0.1863	0.522522	-1.18887	-0.112452			25.4243	25.2736	25.6166	25.2859	25.0269	25.4428	15	24	21	20	19	21
ola-1	WBGene00012344	W08E3.3a	-0.179	0.951019	-2.03215	-0.112714			27.4397	27.2475	27.1985	27.1918	27.1308	27.0261	20	29	25	26	28	24
phb-1	WBGene00004014	Y37E3.9	-0.1831	0.67342	-1.4834	-0.112786			27.9873	27.8788	28.2199	27.7029	27.9085	27.9253	14	20	22	22	26	24
src-1	WBGene00005077	Y92H12A.1c	-0.194133	0.370906	-0.885959	-0.112926			23.7975	23.3514	23.6707	23.7141	23.413	23.1101	6	4	5	5	5	6
ptc-1	WBGene00004208	ZK675.1	-0.225233	0.187693	-0.491082	-0.114994			23.423	23.5827	24.3214	23.1951	23.1744	24.2819	3	2	2	2	2	2
C34B2.8	WBGene00016393	C34B2.8	-0.199133	0.364718	-0.873285	-0.115237			25.7234	25.0714	25.7044	25.4531	25.2536	25.1951	7	9	7	7	13	13
hsf-1	WBGene00002004	Y53C10A.12	-0.1858	0.789154	-1.7097	-0.115499			21.3189	21.0649	21.2982	21.1778	20.9333	21.0135	1	1	1	2	1	1
F11E6.7	WBGene00008710	F11E6.7	-0.180167	1.4175	-3.04437	-0.115552			23.1119	23.1528	23.2814	22.9426	23.0245	23.0385	5	9	6	6	8	8
eif-3.H	WBGene00001231	C41D11.2	-0.2032	0.324979	-0.791054	-0.11566			25.191	25.9041	25.0884	25.1971	25.1655	25.2113	9	14	12	15	14	16
nra-3	WBGene00007651	C17G1.4a	-0.208133	0.281429	-0.698962	-0.115773			20.9484	20.1866	20.2816	20.6089	20.0246	20.1587	1	1	1	1	2	1
smc-4	WBGene00004874	F35G12.8	-0.193267	0.6944	-1.52429	-0.118802			25.5738	25.1779	25.3323	25.064	25.2031	25.2371	16	24	20	21	24	25
iftb-1	WBGene00010560	K04G2.1	-0.1889	1.01106	-2.15452	-0.118979			23.1976	23.321	23.2928	23.1487	22.9235	23.1725	3	5	3	6	7	6
srgp-1	WBGene00006406	F12F6.5b	-0.190933	0.917243	-1.96405	-0.119541			22.1724	22.0811	22.0467	21.8498	22.0854	21.7922	3	5	3	4	5	3
rod-1	WBGene00018900	F55G1.4	-0.1923	0.867381	-1.86437	-0.119952			26.9053	26.8012	27.0467	26.578	26.8199	26.7784	39	47	40	43	50	47
set-16	WBGene00011729	T12D8.1	-0.198533	0.569732	-1.28132	-0.119964			22.3816	22.1481	21.9991	21.8703	22.1933	21.8696	3	4	3	3	3	2
mnat-1	WBGene00018769	F53G2.7	-0.200067	0.529065	-1.20171	-0.120053			21.023	21.201	20.8487	21.0607	20.8067	20.6051	1	1	1	2	2	2
Y66D12A.6	WBGene00013432	Y66D12A.6	-0.291333	0.115341	-0.317483	-0.120503			18.949	21.6853	21.588	20.0993	20.7795	20.4695	NA	1	2	NA	2	2
kat-1	WBGene00002183	T02G5.8	-0.318933	0.100102	-0.278907	-0.120648			21.0566	20.3381	17.3287	19.2607	19.1473	19.3586	1	1	NA	1	1	1
dnj-21	WBGene00001039	T19B4.4	-0.223	0.263639	-0.660633	-0.121357			21.5221	20.7129	20.3999	20.6201	20.5984	20.7474	1	2	2	2	2	2
tsn-1	WBGene00006626	F10G7.2	-0.207067	0.430465	-1.00646	-0.121394			26.6811	27.3871	26.9719	26.8393	26.7734	26.8062	29	50	41	38	44	40
mrpl-45	WBGene00022493	Y119D3B.16	-0.198133	0.689764	-1.51526	-0.121498			23.0503	23.3243	23.4048	23.0109	23.2088	22.9653	5	4	3	5	5	3
leo-1	WBGene00007110	B0035.11	-0.195333	0.904074	-1.93763	-0.122022			22.8684	23.1307	23.1651	22.862	22.7937	22.9225	3	3	3	3	2	3
stt-3	WBGene00020437	T12A2.2	-0.200767	0.665862	-1.46868	-0.122666			25.0429	24.8692	25.0713	24.7397	25.0254	24.616	7	7	9	7	7	6
R04F11.3	WBGene00011016	R04F11.3	-0.227667	0.255693	-0.643362	-0.122806			21.2844	21.618	22.4443	21.4671	21.4827	21.7139	2	2	2	2	4	3
T09A5.7	WBGene00011635	T09A5.7	-0.235833	0.223383	-0.57208	-0.123328			23.2492	22.0723	22.9835	22.7228	22.1185	22.7562	3	2	3	2	4	4
rnp-5	WBGene00004388	K02F3.11	-0.238167	0.217011	-0.557803	-0.123596			20.973	22.2336	22.1818	21.3579	21.7478	21.5682	3	3	2	1	3	3
pas-1	WBGene00003922	C15H11.7	-0.217767	0.359729	-0.863043	-0.124273			25.597	26.3064	25.6584	25.8542	25.5565	25.4978	10	14	14	11	14	15
pbs-3	WBGene00003949	Y38A8.2	-0.232933	0.250404	-0.631812	-0.124652			23.4171	24.5877	23.663	23.7985	23.4774	23.6931	4	5	5	5	3	6
C49H3.3	WBGene00016790	C49H3.3	-0.230267	0.26581	-0.665334	-0.124732			19.5065	18.4165	19.365	18.968	18.8287	18.8005	1	1	1	1	1	1
dpf-3	WBGene00001056	K02F2.1b	-0.197967	1.15703	-2.46044	-0.125259			24.8837	25.1152	25.0407	24.7708	24.7744	24.9005	13	19	17	20	24	19
C35A5.8	WBGene00007952	C35A5.8	-0.2115	0.49386	-1.13244	-0.125388			21.8636	21.3745	21.5306	21.1452	21.455	21.534	2	2	2	2	2	2
erl-1	WBGene00016592	C42C1.15	-0.331433	0.105412	-0.292441	-0.125861			21.0344	17.9125	18.4658	17.7842	18.7739	19.8603	1	1	NA	3	2	1
sbp-1	WBGene00004735	Y47D3B.7	-0.235367	0.252846	-0.63715	-0.125905			20.4055	21.6641	20.952	20.7224	20.8927	20.7004	1	1	1	1	1	1
Y105E8A.8	WBGene00013669	Y105E8A.8	-0.220033	0.382494	-0.909605	-0.126318			21.4049	20.628	20.9263	20.9362	20.6638	20.6991	2	2	1	2	3	3
nfya-1	WBGene00011614	T08D10.1	-0.308867	0.11933	-0.32745	-0.126416			17.3543	19.9353	19.6004	17.7838	18.7281	19.4515	NA	NA	1	NA	1	1
set-18	WBGene00044070	T22A3.4a	-0.2618	0.174978	-0.461566	-0.126645			20.0907	19.5936	18.3305	18.652	19.3696	19.2078	1	1	1	1	2	1
aakb-2	WBGene00012928	Y47D3A.15	-0.216067	0.493365	-1.13147	-0.127777			21.4934	21.0399	21.1653	21.1541	21.1492	20.7471	2	1	2	2	1	1
C25H3.9b	WBGene00016118	C25H3.9b	-0.228467	0.330328	-0.802214	-0.128007			23.3998	23.3316	23.5092	23.7451	22.9134	22.8967	3	2	4	3	5	2
ztf-11	WBGene00009939	F52F12.6a	-0.2979	0.135697	-0.367812	-0.128965			19.2795	20.5589	20.6476	20.3154	20.7471	18.5298	1	1	1	1	1	NA
C36A4.5	WBGene00007966	C36A4.5	-0.210833	0.718187	-1.57071	-0.129011			23.9456	24.286	24.1955	23.7983	24.0964	23.8999	6	10	7	10	7	8
T26A8.4	WBGene00020827	T26A8.4	-0.222467	0.423961	-0.993414	-0.129045			22.078	21.7561	22.3945	21.8392	21.641	22.081	3	3	2	3	3	3
pig-1	WBGene00021012	W03G1.6a	-0.214433	0.611182	-1.36218	-0.129378			28.7536	28.6877	28.8798	28.2819	28.6136	28.7823	12	15	17	17	14	14
cdc-48.1	WBGene00007352	C06A1.1	-0.245767	0.251122	-0.633382	-0.130171			26.9075	28.1396	27.4358	26.9787	27.5059	27.261	34	45	37	37	43	41
ekl-5	WBGene00012512	Y26E6A.1	-0.209167	0.990802	-2.11303	-0.130812			22.4297	22.1841	22.3865	22.0777	22.2504	22.0447	2	2	3	3	3	4
klp-19	WBGene00002229	Y43F4B.6	-0.206867	1.24686	-2.65572	-0.131103			24.9895	25.0285	25.0712	24.7304	24.7685	24.9697	11	14	11	12	20	16
tdp-1	WBGene00006514	F44G4.4a	-0.2239	0.487104	-1.1191	-0.1317			21.736	21.196	21.3392	20.9642	21.3041	21.3312	1	2	2	3	3	2
ddx-23	WBGene00017162	F01F1.7	-0.392867	0.0947087	-0.265055	-0.131737			16.9436	21.0475	21.4628	18.7443	19.7057	19.8253	1	2	1	1	1	1
sucl-1	WBGene00007350	C05G5.4	-0.244767	0.279442	-0.694704	-0.13214			23.3305	22.2534	22.5236	22.3833	22.7278	22.2621	1	2	3	4	2	3
F21D5.6	WBGene00009011	F21D5.6	-0.215767	0.753492	-1.63973	-0.132243			21.9503	21.7004	22.149	21.7102	21.684	21.7582	1	3	3	3	4	3
vhp-1	WBGene00006923	F08B1.1c	-0.256467	0.22881	-0.584178	-0.132266			19.7645	19.5086	20.6085	19.1495	19.8537	20.109	1	2	1	2	2	2
rpt-5	WBGene00004505	F56H1.4	-0.2091	1.36223	-2.91573	-0.133039			28.4707	28.6409	28.5358	28.4262	28.2471	28.3468	44	52	47	51	54	51
ubxn-3	WBGene00018586	F48A11.5b	-0.217633	0.747986	-1.62896	-0.133223			21.5853	21.211	21.5081	21.3559	21.1555	21.1401	4	3	3	2	2	2
fat-1	WBGene00001393	Y67H2A.8	-0.2435	0.309524	-0.758633	-0.13372			21.0871	20.0744	20.2008	20.1402	20.2168	20.2748	1	1	2	1	1	2
set-26	WBGene00013106	Y51H4A.12	-0.2259	0.555269	-1.25305	-0.134442			20.732	20.5262	20.7173	20.7613	20.2109	20.3256	1	1	2	2	2	2
mlc-4	WBGene00003372	C56G7.1	-0.295567	0.160048	-0.426412	-0.134768			25.6812	26.566	25.7471	24.9381	26.9566	25.2129	12	14	9	9	19	13
F11A10.7	WBGene00008688	F11A10.7	-0.2232	0.646701	-1.43136	-0.134788			22.7699	22.7515	22.9037	22.5796	22.331	22.8449	4	4	4	4	4	4
F59H5.1	WBGene00019130	F59H5.1	-0.226433	0.567504	-1.27696	-0.134997			20.2085	19.9576	20.3948	19.8474	20.2084	19.8258	1	1	1	1	1	2
F59A6.5	WBGene00019087	F59A6.5	-0.2183	0.870259	-1.8701	-0.135025			24.3173	24.0032	24.1667	23.7999	24.0408	23.9916	13	17	12	14	14	13
W07A8.2b	WBGene00012319	W07A8.2b	-0.217767	0.90568	-1.94084	-0.135074			19.907	19.6339	19.5598	19.4527	19.5579	19.4368	1	2	2	1	1	1
C06A5.6	WBGene00015504	C06A5.6	-0.222867	0.695829	-1.52708	-0.135404			22.5969	22.9903	22.9996	22.5181	22.6949	22.7052	5	7	6	6	6	6
mut-16	WBGene00003508	B0379.3b	-0.221	0.935558	-2.00091	-0.137229			23.3992	23.1462	23.5151	23.163	23.0996	23.1349	4	5	6	5	5	5
Y55F3AR.2	WBGene00021933	Y55F3AR.2	-0.2352	0.49543	-1.13554	-0.137775			20.1106	19.5251	19.5108	19.6011	19.445	19.3948	1	1	1	1	1	1
ZK105.1	WBGene00022653	ZK105.1	-0.215233	1.59101	-3.46739	-0.137787			21.7491	21.7606	21.695	21.448	21.636	21.475	1	1	1	2	2	2
gpdh-2	WBGene00010778	K11H3.1d	-0.2337	0.548966	-1.24071	-0.138418			23.4659	23.472	23.2975	23.4935	22.872	23.1688	5	6	4	5	7	7
valv-1	WBGene00015216	B0496.7	-0.221	1.40834	-3.02286	-0.140486			23.2845	23.2737	23.2146	23.0226	22.9233	23.1639	4	3	2	4	2	2
exos-4.1	WBGene00007201	B0564.1a	-0.244133	0.450398	-1.04628	-0.140846			20.9785	20.564	20.3209	20.2161	20.6401	20.2748	1	2	2	2	2	2
rsp-1	WBGene00004698	W02B12.3a	-0.241833	0.490628	-1.12606	-0.14103			24.4035	25.088	24.7592	24.4229	24.6764	24.4259	7	10	10	11	11	9
F52G3.1	WBGene00018710	F52G3.1	-0.255167	0.343093	-0.828728	-0.14114			22.5926	21.5619	21.8824	21.6929	21.7338	21.8447	1	3	3	3	3	2
F09F7.4b	WBGene00017301	F09F7.4b	-0.2349	0.65196	-1.4416	-0.141256			22.297	22.2104	22.2237	22.1507	22.1876	21.6881	2	5	3	4	5	5
pbs-5	WBGene00003951	K05C4.1	-0.283067	0.222643	-0.570424	-0.1418			24.1781	25.5494	24.4289	24.9535	24.2443	24.1094	10	11	8	10	12	11
glrx-22	WBGene00044608	C07G1.8	-0.242633	0.521451	-1.18676	-0.142353			22.1701	22.6962	22.7546	22.3462	22.132	22.4148	2	4	2	5	4	3
Y43F8B.2b	WBGene00012813	Y43F8B.2b	-0.252433	0.420345	-0.986152	-0.143757			20.8352	21.497	21.2023	20.9269	21.2195	20.6308	3	2	2	2	1	1
K03H4.2	WBGene00010549	K03H4.2	-0.261167	0.342469	-0.827436	-0.143843			21.2364	20.242	20.3736	20.451	20.2896	20.3279	1	1	1	1	1	2
F26A1.1	WBGene00017801	F26A1.1	-0.3532	0.139463	-0.376983	-0.144938			17.3901	19.8464	20.4509	18.8999	18.7926	18.9353	NA	1	1	1	1	1
Y37E3.8a	WBGene00021350	Y37E3.8a	-0.260833	0.373231	-0.890713	-0.145486			29.3065	30.2682	29.8211	29.3922	29.5117	29.7094	20	26	24	23	21	24
inx-5	WBGene00002127	R09F10.4	-0.2603	0.378301	-0.901061	-0.14551			18.8062	18.6099	19.5344	18.7748	18.8028	18.592	1	1	1	1	1	1
pfkb-1.1	WBGene00022456	Y110A7A.6b	-0.250567	0.507483	-1.15929	-0.146006			24.8115	24.1567	24.2915	24.0184	24.1856	24.304	9	13	11	11	12	12
fgt-1	WBGene00019207	H17B01.1a	-0.2447	0.635154	-1.40887	-0.146204			22.6975	22.2631	22.6026	22.1073	22.4909	22.2309	2	2	2	1	2	2
baf-1	WBGene00000235	B0464.7	-0.2596	0.400851	-0.946855	-0.146322			26.6274	26.6822	27.2461	26.2297	26.6756	26.8716	7	12	10	11	11	10
Y51A2D.7b	WBGene00013075	Y51A2D.7b	-0.249133	0.546825	-1.23652	-0.146422			20.2357	19.7762	20.174	19.5335	19.9199	19.9851	1	1	1	1	2	2
F54E12.2	WBGene00010061	F54E12.2	-0.2616	0.404827	-0.954891	-0.147467			23.7658	22.9762	23.0184	23.1839	22.9097	22.882	3	5	3	2	4	3
T22C1.1	WBGene00011912	T22C1.1	-0.2746	0.312547	-0.764997	-0.147717			22.1941	22.4631	21.8869	22.4302	21.958	21.3321	2	2	2	2	2	1
psmd-9	WBGene00016623	C44B7.1	-0.2416	0.859362	-1.84843	-0.148157			21.8447	21.6124	21.5505	21.525	21.5206	21.2372	1	2	2	3	3	3
F45F2.9b	WBGene00018481	F45F2.9b	-0.237367	1.22412	-2.60572	-0.149185			22.1157	22.1997	22.2693	22.109	21.8397	21.9239	3	2	3	3	3	2
T08G11.1a	WBGene00011629	T08G11.1a	-0.263867	0.435386	-1.01631	-0.149956			23.7119	23.2409	23.6205	22.8302	23.5063	23.4452	8	11	10	9	14	12
F32H2.10	WBGene00009346	F32H2.10	-0.2519	0.676253	-1.48892	-0.150912			22.1756	22.1748	21.8812	21.5696	21.8636	22.0427	2	2	2	4	3	2
ZK1127.4	WBGene00022851	ZK1127.4	-0.266367	0.438769	-1.02307	-0.151314			20.162	19.872	19.746	20.08	19.6109	19.29	1	1	1	1	2	1
saps-1	WBGene00008166	C47G2.5b	-0.2586	0.556971	-1.25638	-0.151598			22.8019	22.4291	22.6368	22.331	22.6828	22.0782	4	7	4	6	7	5
cogc-3	WBGene00022121	Y71F9AM.4a	-0.236133	1.85949	-4.18878	-0.15172			22.4205	22.4428	22.3209	22.0778	22.1784	22.2196	1	1	1	1	2	1
Y76A2B.5	WBGene00013577	Y76A2B.5	-0.265233	0.462041	-1.06944	-0.151734			20.661	20.7953	20.372	20.2657	20.7483	20.0186	1	1	3	2	3	1
F11D5.1c	WBGene00017380	F11D5.1c	-0.471767	0.106705	-0.295723	-0.152414			17.3685	22.1161	20.1908	19.9269	20.4858	17.8474	NA	3	1	1	1	NA
T24B8.7f	WBGene00011980	T24B8.7f	-0.2692	0.461773	-1.06891	-0.153667			20.442	19.7033	19.7618	19.5304	19.7954	19.7737	1	1	2	1	1	2
T10C6.5	WBGene00011687	T10C6.5	-0.277233	0.384761	-0.914219	-0.153741			25.9739	25.3671	25.7124	25.8509	24.9967	25.3741	9	8	8	8	8	9
B0511.7	WBGene00015233	B0511.7	-0.2767	0.389332	-0.923511	-0.153755			21.2378	20.4078	20.3667	20.2442	20.5734	20.3646	1	2	1	2	1	3
rbx-2	WBGene00019993	R10A10.2	-0.258167	0.670803	-1.47831	-0.154163			23.0832	22.5368	22.9719	22.7071	22.5346	22.5757	1	3	3	2	2	3
T19B4.5	WBGene00020558	T19B4.5	-0.2695	0.477586	-1.10028	-0.154447			21.4353	21.5618	21.4419	21.6889	20.9158	21.0258	1	2	2	3	2	2
mrpl-12	WBGene00012361	W09D10.3	-0.2498	1.05224	-2.23955	-0.155007			25.1182	25.33	25.1208	24.9482	25.0857	24.7857	8	12	10	10	11	10
tat-5	WBGene00009498	F36H2.1b	-0.326667	0.208965	-0.539667	-0.155163			20.8968	20.5833	20.4534	21.4951	19.641	19.8174	3	3	1	2	2	4
ZC434.8	WBGene00013894	ZC434.8	-0.2862	0.352515	-0.848195	-0.155762			25.3631	24.4428	24.8601	25.0084	24.3245	24.4745	14	12	15	15	12	13
C01G10.8	WBGene00007235	C01G10.8	-0.2506	1.13443	-2.41222	-0.156245			21.6769	21.8617	21.6473	21.6154	21.3406	21.4781	2	4	3	5	4	5
ina-1	WBGene00002081	F54G8.3	-0.253433	0.991187	-2.11382	-0.156451			20.3183	20.5374	20.3991	19.994	20.1556	20.3449	2	3	1	3	2	1
W03C9.5	WBGene00012221	W03C9.5	-0.326567	0.217603	-0.559133	-0.156697			23.168	22.3494	23.2734	21.6568	23.3855	22.7688	2	2	3	2	2	3
pbs-1	WBGene00003947	K08D12.1	-0.285233	0.374548	-0.893403	-0.156785			23.6083	24.6248	23.8129	23.8795	23.6552	23.6556	3	6	5	6	6	4
rpl-10	WBGene00004421	F10B5.1	-0.2626	0.684952	-1.50588	-0.156834			29.8665	30.4304	30.3291	29.9499	29.9151	29.9732	42	55	48	51	49	48
lst-3	WBGene00003085	Y37A1B.1c	-0.292633	0.330965	-0.803542	-0.156977			23.6522	24.9126	24.2493	23.9575	23.9943	23.9844	3	8	6	5	7	6
dlat-1	WBGene00009082	F23B12.5	-0.274333	0.488893	-1.12264	-0.157268			27.1377	27.9679	27.4278	27.1942	27.2418	27.2744	22	24	24	27	23	24
ZK546.14a	WBGene00022765	ZK546.14a	-0.297267	0.315952	-0.77215	-0.157702			22.5049	22.6551	22.8819	22.9	22.5816	21.6685	2	5	3	4	4	3
hsp-60	WBGene00002025	Y22D7AL.5a	-0.2821	0.417064	-0.979556	-0.157775			27.3162	28.2458	27.4914	27.3919	27.4764	27.3388	43	59	48	53	53	57
sna-2	WBGene00011747	T13F2.7	-0.2779	0.461141	-1.06766	-0.157872			21.6829	21.6732	21.5228	21.3454	21.7917	20.9081	2	3	3	3	3	2
T02H6.11	WBGene00020181	T02H6.11	-0.248233	1.58419	-3.45018	-0.157914			27.1514	27.0021	27.2137	26.8819	26.8098	26.9308	13	19	16	22	17	20
mrps-21	WBGene00017924	F29B9.10	-0.299367	0.309845	-0.75931	-0.158039			21.6745	21.7611	22.0901	22.2786	21.0654	21.2836	1	3	1	1	2	1
snb-1	WBGene00004897	T10H9.4	-0.281267	0.440736	-1.02701	-0.158561			23.6275	22.6904	23.2229	22.9668	22.8393	22.8909	2	2	2	2	2	2
nubp-1	WBGene00008664	F10G8.6	-0.2755	0.533435	-1.21028	-0.159467			25.0418	25.5585	25.3999	24.7496	25.3308	25.0933	8	10	10	9	11	12
R166.2	WBGene00011302	R166.2	-0.2781	0.498079	-1.14077	-0.159481			19.719	19.7186	20.1507	19.9413	19.5503	19.2624	1	1	1	1	1	1
rpl-7	WBGene00004418	F53G12.10	-0.250933	1.57577	-3.429	-0.159507			29.6658	29.748	29.913	29.5185	29.514	29.5415	33	39	35	35	37	40
zyg-12	WBGene00006997	ZK546.1d	-0.254467	1.26926	-2.70536	-0.159634			22.1017	21.8676	22.1748	21.7616	21.8048	21.8143	2	3	3	3	3	4
rde-4	WBGene00004326	T20G5.11	-0.263267	0.829319	-1.78888	-0.15983			23.8717	23.5758	23.9247	23.6426	23.3296	23.6102	5	5	5	8	6	7
C50F2.3	WBGene00016837	C50F2.3	-0.2816	0.465341	-1.076	-0.159845			23.4526	22.8443	23.2792	22.9861	22.5517	23.1935	2	1	2	6	3	4
pat-3	WBGene00003930	ZK1058.2	-0.286867	0.426048	-0.997602	-0.16048			23.4232	23.474	23.4705	22.6056	23.5465	23.355	6	4	5	6	5	5
Y75B8A.31	WBGene00013561	Y75B8A.31	-0.255133	1.48877	-3.21446	-0.161541			25.7175	25.5187	25.7333	25.4613	25.3278	25.415	12	13	15	14	13	14
Y110A2AR.3a	WBGene00022453	Y110A2AR.3a	-0.289567	0.427458	-1.00043	-0.16182			21.2857	20.3351	20.8762	20.6427	20.3644	20.6212	1	1	1	1	2	1
nap-1	WBGene00017075	D2096.8	-0.2561	1.53171	-3.31937	-0.162381			26.0884	26.1866	26.1897	25.7731	25.9098	26.0135	14	17	17	17	14	14
M01A10.1	WBGene00019692	M01A10.1	-0.283733	0.506622	-1.1576	-0.162588			18.7037	18.2468	18.8311	18.4739	17.9719	18.4846	NA	NA	NA	NA	1	1
R08B4.3	WBGene00011139	R08B4.3	-0.262533	1.1338	-2.41086	-0.163176			20.7398	20.4834	20.4476	20.2746	20.4037	20.2049	1	1	1	1	2	2
F53E10.6	WBGene00018762	F53E10.6	-0.284633	0.520161	-1.18423	-0.163549			21.4599	21.3577	21.1634	21.4893	20.8474	20.7904	1	1	1	1	1	1
npp-20	WBGene00003806	Y77E11A.13a	-0.254133	2.12049	-4.98375	-0.163852			27.7858	27.7524	27.6732	27.5157	27.4062	27.5271	23	28	26	24	24	24
C09F9.2	WBGene00007479	C09F9.2	-0.266133	1.0434	-2.22121	-0.164299			25.6005	25.2793	25.2231	25.0714	25.147	25.0861	13	12	15	16	18	17
ajm-1	WBGene00000100	C25A11.4c	-0.450233	0.134303	-0.364406	-0.164587			20.4003	23.5964	21.014	20.4653	22.7268	20.4679	2	6	5	3	5	3
lin-33	WBGene00003019	H32C10.2a	-0.3624	0.20014	-0.519625	-0.16492			18.0224	20.0915	18.054	18.0948	18.5207	18.4652	NA	1	1	1	1	1
ntl-2	WBGene00003825	B0286.4b	-0.257333	1.97936	-4.54129	-0.165311			23.6583	23.5959	23.6751	23.3199	23.4868	23.3506	6	7	7	8	8	9
gcst-1	WBGene00017765	F25B4.1	-0.279633	0.751606	-1.63604	-0.167353			23.4368	22.9193	23.1084	22.9369	22.9717	22.717	6	7	7	8	7	7
cutl-2	WBGene00013145	Y53C12B.6	-0.273067	0.972172	-2.07506	-0.167362			21.9248	22.3294	22.2797	21.9261	21.9484	21.8402	1	1	1	1	2	1
F38B6.4	WBGene00018174	F38B6.4	-0.351833	0.228985	-0.584568	-0.167391			20.4231	18.9679	18.4678	18.6748	18.9982	19.1303	NA	1	NA	1	2	1
ret-1	WBGene00004336	W06A7.3g	-0.290333	0.54802	-1.23886	-0.167401			26.8628	26.0664	26.4724	26.2568	26.0996	26.1742	11	14	16	17	18	16
rpn-11	WBGene00004467	K07D4.3	-0.2765	0.868713	-1.86702	-0.167769			27.0885	27.0719	26.8569	26.9131	26.4832	26.7915	17	23	22	24	21	22
Y71G12B.10	WBGene00022150	Y71G12B.10	-0.292367	0.540802	-1.22472	-0.16815			24.0862	23.451	23.3393	23.409	23.3611	23.2293	2	8	7	9	10	9
flt-1	WBGene00001470	ZK783.4	-0.439767	0.147305	-0.395952	-0.168451			18.1592	20.4214	20.0593	19.9624	17.3848	19.9734	NA	1	1	1	1	2
pac-1	WBGene00015418	C04D8.1d	-0.284567	0.685544	-1.50703	-0.1685			24.8228	24.9694	24.4647	24.2594	24.6556	24.4882	1	2	3	2	3	2
wars-1	WBGene00006945	Y80D3A.1	-0.305767	0.414596	-0.97459	-0.168584			21.4447	22.2788	21.5697	21.7241	21.5261	21.1257	2	2	3	2	2	2
zhit-3	WBGene00006489	ZK856.9	-0.2981	0.490651	-1.12611	-0.168922			24.0914	23.2748	23.9989	23.3917	23.5942	23.4849	3	6	5	5	7	6
T21C9.4	WBGene00011892	T21C9.4	-0.3059	0.432951	-1.01144	-0.169714			23.3566	22.5792	23.4857	22.622	22.9482	22.9336	4	3	3	2	3	3
cku-70	WBGene00000519	Y47D3A.4	-0.3015	0.477496	-1.1001	-0.169949			28.6014	27.7681	28.5583	27.9353	28.0799	28.0081	10	10	8	8	8	7
F07F6.4	WBGene00017217	F07F6.4	-0.2792	0.968899	-2.06841	-0.170766			24.6592	24.4681	24.887	24.5111	24.3237	24.3419	9	13	9	10	10	7
stl-1	WBGene00006061	F30A10.5b	-0.265067	2.19001	-5.21345	-0.170918			25.9292	25.8324	25.9506	25.695	25.5731	25.6489	14	16	15	16	15	15
gbf-1	WBGene00007703	C24H11.7a	-0.279267	0.998041	-2.12784	-0.171199			22.6137	22.3589	22.7713	22.2046	22.3861	22.3154	4	5	4	5	8	4
tag-65	WBGene00006442	F58G11.5	-0.341433	0.278777	-0.693276	-0.17136			20.2059	19.1273	20.058	18.7566	19.9439	19.6664	2	NA	1	NA	1	1
rps-14	WBGene00004483	F37C12.9	-0.2827	0.879314	-1.88814	-0.171362			28.5397	28.765	28.6368	28.0997	28.4532	28.5405	18	19	18	21	19	18
ost-1	WBGene00003893	C44B12.2b	-0.323867	0.347549	-0.837946	-0.171676			19.1809	19.3173	19.3976	18.2224	19.4588	19.243	1	1	1	1	2	1
Y55B1AL.2	WBGene00021904	Y55B1AL.2	-0.293633	0.62988	-1.3986	-0.171721			22.5008	22.8392	23.1488	22.5192	22.7086	22.3801	6	4	5	3	4	4
pas-4	WBGene00003925	C36B1.4	-0.318333	0.389654	-0.924165	-0.172589			25.3088	26.4568	25.7533	25.6881	25.434	25.4418	12	19	14	15	17	17
T13H5.4	WBGene00011758	T13H5.4	-0.276333	1.29036	-2.75248	-0.172666			24.699	24.9369	24.8761	24.6696	24.5849	24.4285	12	16	15	18	15	13
vha-8	WBGene00006917	C17H12.14	-0.2809	1.04602	-2.22665	-0.172739			25.2862	25.1727	24.8887	24.7519	24.9019	24.8511	8	11	9	12	13	11
mdt-9	WBGene00014938	Y62E10A.11b	-0.283067	0.971176	-2.07304	-0.172966			21.8097	21.5819	21.8403	21.6793	21.3668	21.3366	2	3	2	2	2	2
hcp-4	WBGene00001832	T03F1.9	-0.290933	0.783743	-1.69907	-0.174083			24.6712	24.1073	24.3928	24.1364	24.1673	23.9948	9	10	9	12	13	14
C01F1.3a	WBGene00015298	C01F1.3a	-0.2956	0.703919	-1.54286	-0.174747			22.5614	22.5398	22.5491	22.0337	22.6359	22.0939	3	6	6	6	7	6
F33H1.3	WBGene00009364	F33H1.3	-0.280067	1.32164	-2.82299	-0.175128			23.3598	23.1779	23.3203	22.8496	23.1293	23.0389	5	6	5	5	5	5
Y55F3AM.3c	WBGene00021921	Y55F3AM.3c	-0.2943	0.764734	-1.66176	-0.175481			24.3427	23.9362	24.4271	23.7594	24.0104	24.0533	5	5	7	6	7	7
ctl-1	WBGene00000830	Y54G11A.6	-0.276833	1.71189	-3.7813	-0.175967			27.4037	27.3563	27.4199	27.2566	27.0625	27.0303	25	20	21	28	32	31
cor-1	WBGene00000768	R01H10.3b	-0.4853	0.144672	-0.389602	-0.176754			18.8024	22.5976	20.9927	19.9676	21.4522	19.517	NA	5	2	1	4	1
M01F1.3	WBGene00010809	M01F1.3	-0.312567	0.511069	-1.16635	-0.176792			21.1547	20.3421	20.8919	20.2605	20.5168	20.6737	1	2	2	2	2	2
rad-50	WBGene00004296	T04H1.4a	-0.3451	0.313139	-0.766242	-0.17694			21.5754	21.7797	20.9461	20.8978	20.5576	21.8105	2	2	1	2	3	3
thk-1	WBGene00006568	Y43C5A.5b	-0.278233	1.76359	-3.92089	-0.17711			22.7204	22.9472	22.8255	22.5604	22.5023	22.5957	3	3	3	3	4	4
unc-69	WBGene00006802	T07A5.6a	-0.307167	0.625838	-1.39073	-0.178495			21.294	20.829	21.1411	20.6042	21.1276	20.6108	1	2	1	2	1	2
ceh-20	WBGene00000443	F31E3.1	-0.3145	0.532533	-1.20852	-0.178669			22.074	21.8799	21.8328	21.9763	21.1358	21.7311	1	2	2	1	1	1
R11A8.7a	WBGene00011240	R11A8.7a	-0.283767	1.51756	-3.28458	-0.178875			25.7866	25.5456	25.6087	25.3882	25.2713	25.4301	21	29	27	33	33	36
phb-2	WBGene00004015	T24H7.1	-0.305133	0.686966	-1.5098	-0.179269			28.2585	27.6798	28.2436	27.6968	27.6794	27.8903	16	19	16	17	17	15
mca-3	WBGene00003153	Y67D8C.10b	-0.279833	2.00922	-4.63234	-0.179333			23.8654	23.7101	23.8835	23.5289	23.5874	23.5032	7	8	8	9	8	7
pqn-59	WBGene00004143	R119.4	-0.300967	0.778403	-1.68858	-0.179335			25.2856	25.4238	25.6483	25.3318	24.868	25.255	5	8	7	8	7	8
sepa-1	WBGene00010808	M01E5.6	-0.292533	1.08474	-2.30733	-0.179823			23.9509	23.8495	24.0318	23.4291	23.8154	23.7101	4	5	4	5	5	4
lec-5	WBGene00002268	ZK1248.16	-0.421233	0.192221	-0.501504	-0.180019			20.8375	22.3855	20.2708	20.0368	21.8341	20.3592	1	1	1	1	2	2
nmy-2	WBGene00003777	F20G4.3	-0.37	0.266565	-0.666967	-0.180071			28.1343	29.3611	28.1827	27.6818	28.9405	27.9458	77	120	92	87	122	97
rme-8	WBGene00004378	F18C12.2b	-0.3152	0.566718	-1.27543	-0.18041			23.6069	22.8517	23.0608	22.9639	22.9558	22.6541	4	8	6	9	8	5
ddl-1	WBGene00019125	F59E12.10	-0.512333	0.142464	-0.384264	-0.180827			18.9179	21.4699	21.8189	20.9358	18.3037	21.4302	NA	1	1	1	NA	1
mrps-26	WBGene00016412	C34E10.11	-0.294	1.15621	-2.4587	-0.181529			24.5993	24.5828	24.7772	24.5258	24.3779	24.1736	7	8	8	10	11	9
bath-43	WBGene00011815	T16H12.5b	-0.358667	0.309854	-0.759328	-0.181848			18.7622	19.0726	19.699	18.0537	19.2473	19.1568	NA	1	NA	NA	1	2
szy-20	WBGene00004105	C18E9.3e	-0.318133	0.599638	-1.33968	-0.183101			25.6433	24.9588	25.585	25.2484	25.0494	24.9349	10	9	7	9	10	10
Y41D4B.26	WBGene00021525	Y41D4B.26	-0.333967	0.442843	-1.03121	-0.18311			22.2506	21.4526	21.6143	21.8092	21.0698	21.4366	2	4	4	2	2	1
F53C11.4a	WBGene00009974	F53C11.4a	-0.418467	0.207413	-0.536155	-0.183498			18.4688	17.4905	20.0229	17.8476	18.7221	18.1571	NA	NA	NA	1	1	1
fkb-2	WBGene00001427	Y18D10A.19	-0.3731	0.28274	-0.701768	-0.183643			23.5311	24.7588	22.9989	23.5982	23.2575	23.3138	2	4	4	5	5	3
ZK1236.5	WBGene00022864	ZK1236.5	-0.2975	1.17945	-2.50865	-0.183802			23.9261	24.1355	24.0587	23.9457	23.6354	23.6467	6	6	6	5	5	6
rps-22	WBGene00004491	F53A3.3a	-0.315433	0.664746	-1.46651	-0.183916			26.2086	26.4503	26.7299	25.9119	26.0947	26.4359	15	23	21	18	18	19
immt-2	WBGene00012315	W06H3.1	-0.327967	0.50999	-1.16423	-0.184075			24.0004	23.1006	23.5612	23.0615	23.1847	23.4321	8	10	11	7	9	9
E04D5.1a	WBGene00008480	E04D5.1a	-0.311667	0.750142	-1.63318	-0.184327			22.2349	22.7118	22.7007	22.4059	22.0354	22.2711	1	2	2	3	2	2
rps-3	WBGene00004472	C23G10.3	-0.300067	1.12004	-2.38167	-0.184544			28.8734	28.9974	29.2044	28.5694	28.8415	28.7641	33	39	39	41	38	38
dpyd-1	WBGene00016103	C25F6.3	-0.315233	0.696123	-1.52765	-0.184741			21.9365	22.4912	22.5133	21.8383	22.1197	22.0373	4	3	3	2	4	6
mrpl-46	WBGene00021935	Y55F3BL.1	-0.2989	1.19591	-2.54425	-0.184794			22.751	22.4902	22.8835	22.4512	22.3815	22.3953	2	3	3	4	3	3
ekl-4	WBGene00013676	Y105E8A.17b	-0.304133	0.992236	-2.11596	-0.185026			23.2973	23.2039	23.4512	23.2613	22.9057	22.873	4	6	4	6	8	7
hgrs-1	WBGene00004101	C07G1.5	-0.2938	1.60916	-3.51347	-0.185524			27.1064	26.83	26.9945	26.7071	26.7061	26.6363	29	27	31	29	33	34
flh-3	WBGene00012436	Y11D7A.13	-0.3236	0.593895	-1.32848	-0.185594			22.37	21.6884	22.1753	21.6139	22.0244	21.6246	2	4	2	2	3	4
knl-3	WBGene00020392	T10B5.6	-0.3058	1.0015	-2.13493	-0.186096			24.856	24.5047	24.7052	24.3772	24.5602	24.2111	7	7	7	7	7	8
pqn-87	WBGene00004167	Y57A10A.18e	-0.296433	1.65817	-3.63971	-0.187445			26.8173	26.6196	26.6925	26.5266	26.3398	26.3737	37	35	38	33	30	35
Y53F4B.3	WBGene00013150	Y53F4B.3	-0.316933	0.769587	-1.67128	-0.187575			21.9825	21.8241	22.1219	21.9619	21.3776	21.6382	2	2	2	1	3	2
fce-1	WBGene00001405	C04F12.10	-0.324033	0.660508	-1.45825	-0.18815			21.0315	20.3054	20.8216	20.4472	20.4502	20.289	2	1	1	2	2	2
sax-3	WBGene00004729	ZK377.2a	-0.301133	1.409	-3.0244	-0.188259			20.7416	20.4866	20.7167	20.2814	20.298	20.4621	1	2	2	2	4	2
tli-1	WBGene00006578	F25H2.1	-0.293967	2.35127	-5.77877	-0.18955			20.02	20.0391	20.0548	19.6467	19.7737	19.8116	2	2	1	2	2	1
rsa-2	WBGene00012972	Y48A6B.11a	-0.325067	0.700104	-1.53542	-0.189907			23.803	23.1936	23.7364	23.1892	23.4247	23.1439	5	8	5	8	10	7
F56A8.3a	WBGene00010139	F56A8.3a	-0.3239	0.769014	-1.67015	-0.191212			24.1724	23.5059	23.7801	23.467	23.5086	23.5111	5	6	6	8	8	8
taf-9	WBGene00006391	T12D8.7	-0.331667	0.639917	-1.41815	-0.191287			22.1645	22.248	22.3862	22.2715	22.0238	21.5084	3	3	4	4	4	3
R151.10	WBGene00020113	R151.10	-0.333567	0.620249	-1.37984	-0.191513			21.4323	20.9891	21.6671	21.301	20.856	20.9308	2	2	2	2	2	2
rpb-4	WBGene00018391	F43E2.2	-0.329067	0.708191	-1.55119	-0.192196			23.6261	23.301	23.81	23.5505	23.1286	23.0708	2	2	1	2	3	3
wrt-10	WBGene00006956	ZK1290.8	-0.3361	0.608833	-1.3576	-0.192324			23.5161	22.8528	23.1696	23.155	22.719	22.6562	4	5	4	4	3	4
F10E7.6	WBGene00017348	F10E7.6	-0.346533	0.514347	-1.1728	-0.193004			20.8461	19.8732	20.2093	19.8917	20.1167	19.8806	1	1	1	1	2	2
lex-1	WBGene00008682	F11A10.1b	-0.3348	0.659876	-1.45702	-0.19355			19.6571	19.1993	18.8951	18.8133	19.0253	18.9085	NA	1	1	1	2	2
ngp-1	WBGene00003596	T19A6.2b	-0.3312	0.744344	-1.62183	-0.194342			21.8785	22.2976	22.299	21.6401	21.7204	22.121	2	2	2	1	2	1
aldo-2	WBGene00017166	F01F1.12a	-0.380967	0.350151	-0.843317	-0.195193			24.3435	25.5682	24.1232	24.3879	24.2508	24.2533	10	10	7	8	8	7
bca-1	WBGene00000245	T13C5.5	-0.321867	1.07482	-2.28657	-0.196169			22.1695	22.3635	22.6369	22.1404	22.0124	22.0515	3	3	3	3	3	3
F17C11.10	WBGene00008921	F17C11.10	-0.324267	1.06277	-2.26144	-0.197316			23.8124	23.3396	23.5547	23.3309	23.2095	23.1935	6	7	6	10	10	7
T20H4.5	WBGene00020636	T20H4.5	-0.315033	1.55964	-3.38861	-0.197765			26.1658	26.3457	26.3649	26.0241	25.8431	26.0641	11	13	10	12	11	11
pat-2	WBGene00003929	F54F2.1	-0.370367	0.433166	-1.01187	-0.198479			21.7978	21.4863	21.3886	21.148	21.8027	20.6109	1	2	2	2	2	2
oig-2	WBGene00003860	Y38F1A.9	-0.328367	1.1056	-2.35118	-0.200265			22.9683	23.1097	23.1765	22.7447	22.9794	22.5453	2	2	2	2	2	2
T26C12.1	WBGene00020831	T26C12.1	-0.3615	0.522526	-1.18887	-0.20038			22.4343	21.7831	22.8128	21.9117	22.0661	21.9679	3	5	4	5	5	4
unc-87	WBGene00006819	F08B6.4b	-0.542833	0.169967	-0.449828	-0.200547			19.2732	22.0626	20.4593	18.3432	21.37	20.4534	NA	3	1	NA	3	1
rpl-11.1	WBGene00004422	T22F3.4	-0.3281	1.1872	-2.52538	-0.201298			29.4434	29.7322	29.5343	29.4308	29.102	29.1928	21	27	26	26	26	26
swsn-1	WBGene00004203	Y113G7B.23a	-0.3101	2.86832	-7.95255	-0.201495			27.4981	27.452	27.4444	27.1951	27.0846	27.1845	21	30	25	27	28	26
rpl-20	WBGene00004432	E04A4.8	-0.319033	1.74702	-3.87579	-0.201624			30.0491	30.3268	30.1522	29.885	29.8488	29.8372	36	44	39	45	50	44
nuo-6	WBGene00012166	W01A8.4	-0.393067	0.366166	-0.876255	-0.20172			22.8705	21.3443	22.1502	21.8759	21.5882	21.7217	1	2	3	3	2	4
R05D3.8	WBGene00019881	R05D3.8	-0.3353	0.9734	-2.07756	-0.201819			24.3493	24.305	24.6551	24.2069	24.2311	23.8655	8	6	9	6	6	9
cpl-1	WBGene00000776	T03E6.7a	-0.3283	1.23054	-2.61982	-0.201992			30.4182	30.2685	30.4162	30.2675	29.8989	29.9516	31	31	29	31	31	29
hsp-110	WBGene00016250	C30C11.4	-0.347733	0.728492	-1.59083	-0.202337			23.3974	23.6533	22.9418	22.8519	23.0253	23.0721	3	6	5	5	7	7
tufm-1	WBGene00007000	Y71H2AM.23	-0.3772	0.465088	-1.0755	-0.203812			20.9514	22.0717	21.6214	21.3734	20.9266	21.2129	1	2	1	2	3	2
psf-2	WBGene00009287	F31C3.5	-0.3508	0.736205	-1.60591	-0.204138			22.7245	22.1542	22.8165	22.1047	22.3427	22.1954	3	4	4	4	4	4
frm-1	WBGene00001488	ZK270.2b	-0.361967	0.592329	-1.32542	-0.204144			23.575	22.9309	22.9772	23.153	22.6491	22.5951	3	4	3	5	3	5
pck-2	WBGene00011232	R11A5.4a	-0.318	2.29589	-5.57931	-0.204239			30.8096	30.7814	30.9434	30.5806	30.5091	30.4907	99	126	121	116	120	119
pfd-2	WBGene00019220	H20J04.5	-0.334667	1.14167	-2.42763	-0.204332			20.7218	20.8956	20.4276	20.3472	20.3145	20.3793	2	2	1	1	1	1
cdc-48.2	WBGene00008053	C41C4.8	-0.365433	0.564496	-1.27109	-0.204439			25.0029	25.768	25.1983	24.6167	25.1807	25.0755	9	16	9	13	14	16
cash-1	WBGene00010631	K07C5.8	-0.3233	1.84292	-4.14161	-0.204872			26.121	25.8932	25.9489	25.6482	25.6094	25.7356	17	17	19	16	17	19
ced-9	WBGene00000423	T07C4.8	-0.353833	0.714591	-1.56369	-0.204968			21.4735	20.8674	21.2638	21.0294	20.9416	20.5722	1	1	2	3	2	3
C49H3.9	WBGene00016794	C49H3.9	-0.335933	1.13811	-2.42004	-0.204986			23.3962	23.1161	23.5385	23.1138	22.8998	23.0294	4	6	4	5	6	5
npp-9	WBGene00003795	F59A2.1a	-0.3275	1.55904	-3.38712	-0.205112			29.1038	28.7806	28.9829	28.6327	28.5891	28.663	42	51	50	51	51	53
F31D4.5b	WBGene00009292	F31D4.5b	-0.3847	0.457442	-1.0603	-0.206515			22.4489	23.4963	22.7017	22.2925	22.8544	22.3459	2	6	6	7	5	5
Y71H2AM.4	WBGene00022169	Y71H2AM.4	-0.3666	0.610396	-1.36064	-0.207185			26.2998	25.3691	25.7961	25.4265	25.4806	25.4581	7	10	10	8	9	12
C30B5.4	WBGene00016245	C30B5.4	-0.338433	1.20524	-2.56453	-0.207378			19.8425	20.0925	20.2779	19.6725	19.7201	19.805	1	1	2	1	1	1
prp-21	WBGene00004188	W07E6.4	-0.3255	2.02599	-4.68409	-0.207392			24.9591	24.8469	25.0344	24.6794	24.537	24.6475	10	14	12	9	12	13
H19N07.3a	WBGene00010407	H19N07.3a	-0.331067	1.71456	-3.78844	-0.208561			23.9376	23.8504	24.0158	23.4588	23.6947	23.6571	4	8	4	5	5	6
gpx-2	WBGene00011045	R05H10.5a	-0.338733	1.3197	-2.8186	-0.209072			26.9836	26.7878	26.7428	26.6886	26.4131	26.3963	9	9	12	13	9	10
mrps-30	WBGene00044321	B0511.8	-0.3237	2.62615	-6.85937	-0.209218			25.2712	25.3677	25.4242	25.0611	25.0146	25.0163	16	15	12	16	12	13
clec-78	WBGene00018547	F47C12.2	-0.324833	2.48069	-6.268	-0.209324			21.9803	21.8705	21.8157	21.5751	21.5278	21.5891	3	4	2	3	3	3
F41C3.5	WBGene00018271	F41C3.5	-0.344333	1.117	-2.37525	-0.209325			24.0826	24.2362	24.1565	23.5485	23.8818	24.012	7	10	7	6	9	9
K08D12.3a	WBGene00019537	K08D12.3a	-0.3586	0.788573	-1.70856	-0.209722			27.0635	27.1357	27.6188	27.1357	26.7388	26.8677	9	13	11	12	10	11
dab-1	WBGene00000894	M110.5b	-0.356633	0.830364	-1.79095	-0.209892			26.1779	25.58	26.0192	25.716	25.4129	25.5783	16	17	19	14	18	15
ran-5	WBGene00004306	R12C12.2	-0.387367	0.489532	-1.1239	-0.209993			25.1571	24.0125	24.4288	24.2222	24.2348	23.9793	4	6	5	6	7	7
C01F1.1	WBGene00015296	C01F1.1	-0.360167	0.774115	-1.68016	-0.210088			21.9132	21.3606	21.8148	21.2977	21.5785	21.1319	3	5	3	4	3	3
hbl-1	WBGene00001824	F13D11.2a	-0.372433	0.613162	-1.36603	-0.210101			23.5375	22.894	23.4798	22.6565	23.2677	22.8698	5	6	7	6	8	5
coq-8	WBGene00000767	C35D10.4	-0.330467	2.16736	-5.13771	-0.211252			19.3169	19.5238	19.4302	19.049	19.1006	19.1299	1	1	1	2	2	2
eef-1B.2	WBGene00012768	Y41E3.10a	-0.345567	1.25659	-2.67725	-0.212124			30.0007	30.2179	30.4307	29.8744	29.8079	29.9303	35	41	37	41	40	38
Y39A1A.3	WBGene00012643	Y39A1A.3	-0.356933	0.921735	-1.97308	-0.212346			23.8493	23.3953	23.6611	23.164	23.1448	23.5261	3	3	5	5	4	4
T21F4.1b	WBGene00020658	T21F4.1b	-0.393133	0.494988	-1.13467	-0.21291			22.4297	22.3463	23.1572	22.0044	22.7145	22.0349	2	2	2	5	5	4
pqbp-1.1	WBGene00020647	T21D12.3	-0.351267	1.12883	-2.40031	-0.213362			21.0513	20.6307	21.0521	20.4896	20.5574	20.6333	1	1	1	2	2	2
cfp-1	WBGene00009924	F52B11.1c	-0.388833	0.536092	-1.21549	-0.213657			21.6738	21.0378	22.1072	21.164	21.1195	21.3688	2	2	3	3	3	3
flh-2	WBGene00016138	C26E6.2	-0.3671	0.823594	-1.77757	-0.215116			23.7925	23.8186	24.1448	23.7191	23.7292	23.2063	8	8	8	8	6	6
rpl-4	WBGene00004415	B0041.4	-0.358767	1.00603	-2.1442	-0.215176			31.4819	32.0299	31.9038	31.4043	31.4845	31.4505	80	92	86	80	83	76
tag-297	WBGene00007999	C38C6.6	-0.3975	0.505731	-1.15584	-0.215575			23.4868	22.7552	23.7263	22.5999	23.2275	22.9484	9	7	9	6	7	7
sym-1	WBGene00006366	C44H4.3	-0.4516	0.320725	-0.782158	-0.217389			19.8804	21.5303	19.99	19.8973	20.4465	19.7021	1	3	1	1	2	1
arid-1	WBGene00044689	Y108G3AL.7	-0.4579	0.317903	-0.776244	-0.219102			21.4781	19.6685	21.3764	20.4799	20.2778	20.3916	1	NA	2	2	2	2
ZK973.11	WBGene00022836	ZK973.11	-0.396733	0.569989	-1.28182	-0.219249			19.1222	18.2988	19.2882	18.5704	18.534	18.4146	NA	1	NA	1	2	1
snap-1	WBGene00017016	D1014.3	-0.399133	0.553348	-1.24929	-0.219366			21.7448	22.4551	21.5045	21.7885	21.3812	21.3373	3	4	3	3	3	1
F49C12.9	WBGene00009878	F49C12.9	-0.378933	0.794009	-1.71925	-0.220258			23.5343	23.8593	23.8588	23.0732	23.7302	23.3122	8	9	8	8	10	13
ubc-18	WBGene00006713	R01H2.6	-0.367633	1.02395	-2.18103	-0.22033			26.5274	26.1548	26.7184	26.0352	26.1327	26.1298	6	7	8	8	7	8
gars-1	WBGene00001744	T10F2.1b	-0.355533	1.53269	-3.32177	-0.221236			26.7062	27.0501	26.8072	26.4385	26.5097	26.5487	30	35	37	32	38	37
C08H9.2a	WBGene00007463	C08H9.2a	-0.3831	0.764389	-1.66109	-0.221364			27.8798	28.6772	28.304	27.9264	27.8887	27.8966	59	80	62	64	70	73
noah-1	WBGene00016422	C34G6.6a	-0.409133	0.523107	-1.19001	-0.221896			25.1383	26.1425	25.0941	24.9859	25.0765	25.0851	8	15	9	12	15	13
ufm-1	WBGene00044324	ZK652.3	-0.372267	0.987558	-2.10641	-0.222019			22.9675	23.0014	22.738	22.7734	22.2388	22.5779	3	3	3	4	3	3
K02C4.3	WBGene00010502	K02C4.3	-0.3698	1.08662	-2.31128	-0.222771			24.2159	23.7714	24.1826	23.7295	23.7844	23.5466	5	6	6	7	11	8
F13E6.1	WBGene00008745	F13E6.1	-0.397667	0.64062	-1.41952	-0.22339			25.2606	24.4088	24.9828	24.2569	24.5161	24.6862	7	7	7	9	6	6
F39B2.3	WBGene00009554	F39B2.3	-0.370633	1.11803	-2.37742	-0.223826			26.3474	26.0166	26.4173	26.0661	25.8632	25.7401	15	19	15	18	17	17
C45G9.7	WBGene00016678	C45G9.7	-0.3681	1.20398	-2.56178	-0.223947			22.8455	22.4404	22.5347	22.3875	22.1848	22.144	1	1	1	1	1	1
prp-6	WBGene00013343	Y59A8B.6	-0.3638	1.41672	-3.04253	-0.224627			25.661	25.4971	25.4318	25.3624	25.0763	25.0598	13	14	16	18	20	18
his-66	WBGene00001940	H02I12.6	-0.3859	0.841023	-1.81205	-0.225282			28.693	28.6611	29.2185	28.2486	28.611	28.5553	15	17	20	20	18	19
ain-2	WBGene00015007	B0041.2d	-0.3684	1.31197	-2.80111	-0.225802			26.9376	26.9045	27.2701	26.6454	26.7837	26.5779	16	19	19	17	18	17
R02D3.7	WBGene00019824	R02D3.7	-0.4	0.680463	-1.49713	-0.22635			22	21.3122	22.0806	21.2431	21.341	21.6087	2	3	2	2	3	3
lec-3	WBGene00002266	ZK892.1b	-0.364167	1.55103	-3.36719	-0.22645			24.6788	24.3461	24.4833	24.0895	24.2361	24.0901	6	8	8	10	8	9
C08B6.8a	WBGene00007429	C08B6.8a	-0.355333	2.45144	-6.1545	-0.228109			28.8782	29.0089	29.0717	28.6493	28.6202	28.6233	30	32	30	31	30	29
F08B6.1	WBGene00017239	F08B6.1	-0.3955	0.801474	-1.73394	-0.228865			23.6318	23.2956	23.671	23.504	22.8415	23.0664	3	3	3	3	3	3
ZK652.6a	WBGene00022785	ZK652.6a	-0.3639	1.99247	-4.5811	-0.230399			23.171	22.9995	23.0644	22.7883	22.5918	22.7631	3	5	4	5	5	6
mdt-15	WBGene00007016	R12B2.5b	-0.396167	0.862386	-1.85444	-0.231185			20.5729	20.2342	20.7894	19.8657	20.3329	20.2094	1	1	1	1	1	1
F37F2.2	WBGene00018159	F37F2.2	-0.3818	1.20283	-2.55927	-0.231509			24.16	23.9661	24.0859	23.9239	23.6969	23.4458	6	7	7	6	6	8
glrx-5	WBGene00013029	Y49E10.2	-0.403233	0.768155	-1.66847	-0.23152			28.7735	28.007	28.5169	28.1987	27.9827	27.9063	18	19	19	18	18	18
iff-1	WBGene00002064	T05G5.10b	-0.431867	0.526684	-1.19704	-0.232089			31.6367	30.684	31.4406	31.2087	30.4698	30.7872	40	36	36	36	37	37
rnp-1	WBGene00004384	ZK863.7a	-0.405	0.760281	-1.65303	-0.232091			24.2422	23.5497	23.941	23.5974	23.2295	23.691	5	6	5	6	5	5
vps-37	WBGene00016990	CD4.4	-0.434167	0.51376	-1.17165	-0.232105			25.3249	24.1228	24.6988	24.4652	24.0309	24.3479	6	8	8	7	6	5
bub-1	WBGene00000275	R06C7.8	-0.368667	1.93362	-4.40438	-0.232788			26.5727	26.3057	26.4997	26.0407	26.1258	26.1056	23	22	26	22	21	20
mai-2	WBGene00015248	B0546.1	-0.416033	0.656049	-1.44957	-0.23281			26.0791	25.3874	25.3045	24.9965	25.057	25.4694	6	5	6	6	4	5
ran-1	WBGene00004302	K01G5.4	-0.412167	0.711307	-1.55727	-0.233566			24.3039	23.6764	23.7118	23.1487	23.6224	23.6845	5	7	8	7	10	8
swsn-9	WBGene00007256	C01H6.7b	-0.363733	2.57282	-6.63723	-0.233942			23.6443	23.5041	23.6118	23.2925	23.1869	23.1896	5	7	6	5	10	10
nola-3	WBGene00007708	C25A1.6	-0.4181	0.694934	-1.52534	-0.235668			25.217	24.3597	24.7197	24.5717	24.2836	24.1868	6	7	8	7	6	6
B0261.7	WBGene00015095	B0261.7	-0.385733	1.35919	-2.90873	-0.236268			21.77	21.4916	21.5133	21.1545	21.0679	21.3953	1	1	1	3	2	2
blos-2	WBGene00022251	Y73B6BL.30a	-0.4156	0.736042	-1.60559	-0.236291			22.2587	21.393	22.0067	21.4973	21.4102	21.5041	3	1	2	2	2	2
R53.2	WBGene00011272	R53.2	-0.4136	0.804257	-1.73943	-0.238005			22.3375	21.7607	21.9279	21.9072	21.5312	21.3469	2	2	2	3	3	3
denn-4	WBGene00018681	F52C12.4e	-0.436733	0.582947	-1.30712	-0.238116			22.5007	21.5327	21.6911	21.6136	21.6243	21.1764	3	2	2	4	5	3
F21D5.1	WBGene00009006	F21D5.1	-0.378033	1.94647	-4.44255	-0.238493			29.0854	29.1702	29.2564	28.664	28.9017	28.8122	44	62	52	67	67	64
psf-3	WBGene00022043	Y65B4BR.8	-0.3917	1.29431	-2.76135	-0.238572			22.118	21.9645	22.3139	21.9324	21.6898	21.5991	1	1	1	1	2	1
dut-1	WBGene00010609	K07A1.2	-0.387	1.50318	-3.24945	-0.239022			29.308	29.078	29.2534	28.9853	28.6511	28.842	36	47	44	46	43	46
C50D2.5	WBGene00016808	C50D2.5	-0.386367	1.55348	-3.37327	-0.239305			23.9106	23.9615	24.0604	23.7724	23.5949	23.4061	4	7	5	5	5	6
cir-1	WBGene00018892	F55F8.4	-0.4123	0.862141	-1.85395	-0.239377			20.7062	20.4325	20.5932	20.5611	20.0755	19.8584	2	2	1	1	1	1
[truncated: 744 more rows]

## Sheet: 1b - Table S2
Protein domain	Coordinates	SeqID	GDT	PDB ID	RMSD (length)
					5nt7 3s93
M1 L1	1-101	16	33	5nt7	0.9 (80)	3.7 (72)
M1 L2	227-314	10	50	2lh9	4.2 (72)	1.6 (72)
M2 L1	1-104	14	51	5nt7	2.0 (80)	1.4 (72)
M2 L2	243-327	16	57	3s93	3.3 (72)	3.1 (80)

## Sheet: 1c - Table S3
Protein domain	M1 L2	M2 L1	M2 L2
M1 L1	4.1 (72)	3.0 (88)	3.9 (80)
M1 L2		1.7 (72)	3.1 (80)
M2 L1			1.6 (80)

## Sheet: 1d - Table S4
Phenotype	Description
Minor Defects	No major or significant difference from germlines treated with the RNAi control (L4440).
Reduced Germline	There are many variants of this phenotype, having in common the overall reduction of multiple regions of the germline. There are often fewer oocytes and smaller pachytene regions. These animals are not always sterile.
Abnormal Oocytes	The size of some oocytes is significantly smaller than observed in control animals. These smaller oocytes tend to accumulate next to the spermatheca. The chromosome morphology in the oocytes tends to be abnormal and these animals make abnormal embryos as well.
Spermatogenesis Only	The germline produces only male gametes. Through late hermaphrodite adulthood, the germline fails to switch from a spermatogenic program to an oogenic program.
Pachytene Arrest	The germline nuclei do not progress in the meiotic division beyond the pachytene stage. The germline turn is present, and all nuclei beyond the turn have chromosomes with pachytene morphology. Often, there is also early entry into pachytene with reduced mitotic and transition zones.
Few Germ Cells	Germ cell populations are far fewer than normal. The germ cell number ranges from 2 to 14. The DNA morphology of these cells is abnormal.

## Sheet: 1e - Table S5
Protein/ domain	M1 L1	M1 L2	M2 L1	M2 L2
M1 L1		-16.7	-21.1
M1 L2			-5.3
M2 L1
M2 L2				-6.1
GLH-1	-27.1		-4.9	-0.8

## Sheet: 1f - Table S6
Name	Description	Genotype	Reference
GKC1	mip-1D	mip-1(uae1)­ III	This study
GKC2	mip-2D	mip-2(uae2) V	This study
GKC3	mip-1D; mip-2D	mip-1(uae1) III; mip-2(uae2) V	This study
GKC6	meg-3D; mip-1::GFP; mip-2::mCherry	mip-1(knu191[mip-1::GFP]) III; mip-2(knu412[mip-2::mCherry]) V; meg-3(uae4) X	This study
GKC501	mip-1::3xFLAG	mip-1(usa2[mip-1::3xFLAG]) III	This study
GKC502	mip-2::3xFLAG	mip-2(usa3[mip-2::3xFLAG]) V	This study
GKC509	lag-2p::GFP; his-58::mCherry; GFP::PH(PLC1δ1)	qIs153[lag-2p::MYR::GFP + ttx-3p:DsRed]; ltIs37[(pAA64) pie-1p::mCherry::his-58 + unc-119(+)] IV; ltIs38[pAA1; pie-1p::GFP::PH(PLC1δ1) + unc-119(+)]	This study
GKC511	mip-2::GFP	mip-2(usa4[mip-2::GFP]) V	This study
GKC518	mip-1::GFP; mip-2::mCherry	mip-1(knu191[mip-1::GFP]) III; mip-2(knu412[mip-2::mCherry]) V	This study
GKC525	mip-1D; GFP::pgl-3	mip-1(uae1) unc-119(ed3)? III; axIs1464[pie-1p::GFP::pgl-3 ORF::pgl-3 3'utr + unc-119(+)]	This study
GKC548	mip-2D; glh-1::GFP	glh-1(sam24[glh-1::gfp::3×FLAG]) I; mip-2(uae2) V	This study
GKC551	mip-1D; glh-1::GFP	glh-1(sam24[glh-1::gfp::3×FLAG]) I; mip-1(uae1) III	This study
GKC553	mip-1D; mip-2::mCherry	mip-1(uae1) III; mip-2(knu412[mip-2::mCherry])V	This study
GKC554	mip-1::GFP; mip-2D	mip-1(knu191[mip-1::GFP]) III; mip-2(uae2) V	This study
GKC555	mip-1D; mip-2D; glh-1::GFP	glh-1(sam24[glh-1::gfp::3×FLAG]) I; mip-1(uae1) III; mip-2(uae2) V	This study
GKC564	mip-1::GFP	mip-1[knu191 - pNU696 (C-terminal GFP, loxP::unc-119(+)::loxP)] unc-119 (ed3) III	This study
GKC565	mip-2::mCherry	mip-2 (knu412[mip-2::mCherry])	This study
GKC566	mCherry::pgl-1; mip-1::GFP	mip-1(knu191[mip-1::GFP]) unc-119(ed3) III; tjIs15[pie-1::mCherry::pgl-1+unc-119(+)]	This study
GKC567	mip-2D; GFP::pgl-3	unc-119(ed3) III; mip-2(uae2) V; axIs1464[pie-1p::GFP::pgl-3 ORF::pgl-3 3'utr + unc-119(+)]	This study
DUP64	glh-1::GFP	glh-1(sam24[glh-1::gfp::3×FLAG]) I	Andraloj K et al. PLoS Genet (2017)
SA180	mCherry::pgl-1	unc-119(ed3) III; tjIs15[pie-1::mCherry::pgl-1+unc-119(+)]	Sugimoto A. (personal communication)
OD95	his-58:mCherry; GFP::PH(PLC1δ1)	unc-119(ed3) III; ltIs37[(pAA64) pie-1p::mCherry::his-58 + unc-119(+)] IV; ltIs38[pAA1;pie-1p::GFP::PH(PLC1δ1) + unc-119(+)]	McNally et al., J Cell Biol (2006)
JH3016	GFP::meg-3	unc-119(ed3) III; axIs2076 [meg-3p::GFP::meg-3::meg-3 3'UTR + unc-119(+)]	Wang JT, et al. eLife (2014)
JH3503	meg-3::GFP	meg-3(ax3054[meg-3::meGFP]) X	Smith et al. eLife (2016)
JK4475	lag-2p::MYR::GFP	qIs153[lag-2p::MYR::GFP + ttx-3p:DsRed]	Byrd DT, et al. PLoS One (2014)
JH2017	GFP::pgl-3	unc-119(ed3) III; axIs1464[pie-1p::GFP::pgl-3 ORF::pgl-3 3'utr + unc-119(+)]	Gallo et al. Science (2010)

## Sheet: 1g - Table S7
Target gene	Target Location (strand +/-)	Strain Desc-	Guide Sequence	Repair Template Sequence	Screening Primers (Forward / Reverse)
		ription
dpy-10	Exon 5/ (+)	Co-CRISPR screening tool	GCTACCATAGGCACCACGAG	CACTTGAACTTCAATACGGCAAGATGAGAATGACTGGAAACCGTACCGCATGCGGTGCCTATGGTAGCGGAGCTTCACATGGCTTCAGACCAACAGCCTAT
mip-1	50nt upstream of C-terminus (+)	MIP-1::3xFLAG	TATCAATGCTGCGTTGCCGT	ACCACAACAATCGACTACATCTTCAATTGATAATGAGTGTCTAGAAGCTATCAATGCTGCGTTGCCGTCGGATAAGGATAGTTGGGACTACAAAGACGATGACGACAAGGACTACAAAGACGATGACGACAAGGACTACAAAGACGATGACGACAAGTGATCGAAATTTTACGTGCTTTAAAATATCCTGTTTATGTGTT	TCACCACAACAATCGACTACA / GCCAATCTTGACATGGCAGA
mip-2	C-terminus (+)	MIP-2::3xFLAG	GCACTGCTTCAACTACGCCT	TGAACTCCGATTTCTCGCCGAACATCTCCCAGGCGGACTACAAAGACGATGACGACAAGGACTACAAAGACGATGACGACAAGGACTACAAAGACGATGACGACAAGTAGTTGAAGCAGTGCTCCTGACACGTATTTTATAATAT	ATTCCACCGTATCCCCGTAC / GGGTGTGAAAATACGGCCTC
mip-1	Full gene deletion (+/-)	mip-1 null allele	N-term:	gatcaaattgtaaaatgttctctcagaagtgacattcacttggcaaATGTGAtcgaaattttacgtgctttaaaatatcctgtttatgtgtttttgtaaaattattttttaattag	CGTGCATCAGACTGGGTCTG / TTCGTGAATGACTCGCATCC
			GACATTCACTTGGCAAATGA
			C-term:
			TGCCGTCGGATAAGGATAGT
mip-2	Full gene deletion (+/-)	mip-2 null allele	N-term: tgaaaaATGTCTGAAGAAGA	gaatatttaaagtcattcaactgattgttttactgtttccagcatttgcGtgaaaaATGTAGttgaagcagtgctcctgacacgtattttataatatttatgttttttttg	GCCACGATTTTGACATTTTTAAG / CGAAAATAGCGAAAATGGTTC
			C-term: GCACTGCTTCAACTACGCCT
meg-3	Full gene deletion (+/-)	mip-1 null allele	N-term:	atttatttcaatatttcattaagttttgatttttgcaggtATGTGAttgtaccaatttatatctattacttgtagactatattgtatg	CAATATTTCATTAAGTTTTG / CATCCAGACAACAATATAATAC
			ACCGCTTGGGTAAGGTTTTG
			C-term:
			ttggtacaaTCATTGATCTC

## Sheet: 1h - Table S8
Gene	Segment	Vector / tag	Antibiotic Resistance	Restriction Site (F/R)	Forward / Reverse Primer
mip-1	Full	pET-28-SUMO / SUMO-His	Kan	SacI / NotI	TGACGTTGAGCTCATGACGGAAGCTGACGATCCC / TGACGTTGCGGCCGCCCAACTATCCTTATCCGACGGC
mip-1	Full	pGEX-6p-1 / GST	Amp	SalI / NotI	TGACGTTGTCGACTCATGACGGAAGCTGACGATCCC / TGACGTTGCGGCCGCCCAACTATCCTTATCCGACGGC
mip-1	N-terminus	pET-28-SUMO / SUMO -His	Kan	SacI / NotI	TGACGTTGAGCTCATGACGGAAGCTGACGATCCC / TGACGTTGCGGCCGCCGGACGAACAACTGGTATTTG
mip-1	C-terminus	pET-28-SUMO / Sumo-His	Kan	SacI / NotI	TGACGTTGAGCTCATAGTGTCTGTCGCAGAAAGTATGAAAGG / TGACGTTGCGGCCGCCCAACTATCCTTATCCGACGGC
mip-1	N-terminus	pGEX-6p-1 / GST	Amp	SalI / NotI	GTCGACTCGAGCGGCCGCATATGACGGAAGCTGACGATCC / TGACGTTGCGGCCGCCGGACGAACAACTGGTATTTG
mip-1	C-terminus	pGEX-6p-1 / GST	Amp	NotI / NotI	TGACGTTGCGGCCGCATATAGTGTCTGTCGCAGAAAGTATGAAAGG / TGACGTTGCGGCCGCCCAACTATCCTTATCCGACGGC
mip-1	LOTUS 1	pGEX-6p-1 / GST	Amp	SalI / NotI	TGACGTTGTCGACTCATGACGGAAGCTGACGATCCC / TGACGTTGCGGCCGCTTTCTTTTTTTTCTTCTGCTTTGAGATC
mip-1	LOTUS 2	pGEX-6p-1 / GST	Amp	SalI / NotI	TGACGTTGTCGACTCTTGCAACCCGGGATTGACTCG / TGACGTTGCGGCCGCAGGAGCAGGTGGCATTGATTTC
mip-2	Full-length	pET-28-SUMO / SUMO -His	Kan	SacI / NotI	TGACGTTGAGCTC atgtctgaagaagaaggcaaagaaaaaatg / TGACGTTGCGGCCGCCGCCTGGGAGATGTTCGGCG
mip-2	Full-length	pGEX-6p-1 / GST	Amp	XmaI (2x) / NotI	TGACGTTCCCGGGCCCGGGTatgtctgaagaagaaggcaaagaaaaaatg / TGACGTTGCGGCCGCCGCCTGGGAGATGTTCGGCG
mip-2	N-terminus	pET-28-SUMO / SUMO -His	Kan	BamHI / SalI	TGACGTTGGATCCatgtctgaagaagaaggcaaagaaaaaatg / TGACGTTGTCGACGTATCTAAACCCTTGTGATATTGGTAGCTG
mip-2	C-terminus	pET-28-SUMO / SUMO -His	Kan	SacI/ NotI	TGACGTTGAGCTCcaggatcctaactcaaagccgaaag / TGACGTTGCGGCCGCCGCCTGGGAGATGTTCGGCG
mip-2	C-terminus	pGEX-6p-1 / GST	Amp	NotI/ NotI	TGACGTTGCGGCCGCATCAGGATCCTAACTCAAAGCCGAAAG / TGACGTTGCGGCCGCCGCCTGGGAGATGTTCGGCG
mip-2	LOTUS 1	pGEX-6p-1 / GST	Amp	SalI/ NotI	TGACGTTGTCGACTCATGTCTGAAGAAGAAGGCAAAGAAAAAATG / TGACGTTGCGGCCGCTCCGTCGCTCTGCTTCGAGATC
mip-2	LOTUS 2	pGEX-6p-1 / GST	Amp	SalI/ NotI	TGACGTTGTCGACTCCCTGTCAAGAAGCATGTGC / TGACGTTGCGGCCGCAGCAACAGTTGTAGCTTCAAC
glh-1	Full-length	pGEX-6p-2 / GST	Amp	SalI/ NotI	TGACGTTGTCGACTCATGTCTGATGGTTGGAGTGATAGCG / TGACGTTGCGGCCGCCCAGCCTTCTTCATCTTGAGGG
glh-1	Helicase domains	pGEX-6p-2 / GST	Amp	SalI/ NotI	TGACGTTGTCGACTCGGTGTTGAAGGAGAAGGACCTAAG / TGACGTTGCGGCCGCCCAGCCTTCTTCATCTTGAGGG
